# Supplementary material for: Catalytic enantioselective addition of organoboron reagents to fluoroketones controlled by electrostatic interactions
Source: Springer Nature journal article supplement (doi:10.1038/nchem.2523), 2016-05-23
Supplement: 41557_2016_BFnchem2523_MOESM268_ESM.cif [file 41557_2016_BFnchem2523_MOESM268_ESM.cif]

 
data_C10H7Cl2F3O2
 
_audit_creation_method            'SHELXL-2014/7'
_shelx_SHELXL_version_number      '2014/7'
_chemical_name_systematic         ?
_chemical_name_common             ?
_chemical_melting_point           ?
_chemical_formula_moiety          'C10 H7 Cl2 F3 O2' 
_chemical_formula_sum
 'C10 H7 Cl2 F3 O2' 
_chemical_formula_weight          287.06

loop_
 _atom_type_symbol
 _atom_type_description
 _atom_type_scat_dispersion_real
 _atom_type_scat_dispersion_imag
 _atom_type_scat_source
 'C'  'C'   0.0181   0.0091
 'International Tables Vol C Tables 4.2.6.8 and 6.1.1.4'
 'H'  'H'   0.0000   0.0000
 'International Tables Vol C Tables 4.2.6.8 and 6.1.1.4'
 'O'  'O'   0.0492   0.0322
 'International Tables Vol C Tables 4.2.6.8 and 6.1.1.4'
 'F'  'F'   0.0727   0.0534
 'International Tables Vol C Tables 4.2.6.8 and 6.1.1.4'
 'Cl'  'Cl'   0.3639   0.7018
 'International Tables Vol C Tables 4.2.6.8 and 6.1.1.4'
 
_space_group_crystal_system       orthorhombic
_space_group_IT_number            19
_space_group_name_H-M_alt         'P 21 21 21'
_space_group_name_Hall            'P 2ac 2ab'
 
_shelx_space_group_comment
;
The symmetry employed for this shelxl refinement is uniquely defined
by the following loop, which should always be used as a source of
symmetry information in preference to the above space-group names.
They are only intended as comments.
;
 
loop_
 _space_group_symop_operation_xyz
 'x, y, z'
 '-x+1/2, -y, z+1/2'
 '-x, y+1/2, -z+1/2'
 'x+1/2, -y+1/2, -z'
 
_cell_length_a                    6.2490(4)
_cell_length_b                    9.8370(6)
_cell_length_c                    18.7718(10)
_cell_angle_alpha                 90
_cell_angle_beta                  90
_cell_angle_gamma                 90
_cell_volume                      1153.93(12)
_cell_formula_units_Z             4
_cell_measurement_temperature     100(2)
_cell_measurement_reflns_used     9927
_cell_measurement_theta_min       4.71
_cell_measurement_theta_max       69.65
 
_exptl_crystal_description        needle
_exptl_crystal_colour             colorless
_exptl_crystal_density_meas       'not measured' 
_exptl_crystal_density_method     none
_exptl_crystal_density_diffrn     1.652          
_exptl_crystal_F_000              576
_exptl_transmission_factor_min    ?
_exptl_transmission_factor_max    ?
_exptl_crystal_size_max           0.340
_exptl_crystal_size_mid           0.080
_exptl_crystal_size_min           0.050
_exptl_absorpt_coefficient_mu     5.368
_shelx_estimated_absorpt_T_min    0.263
_shelx_estimated_absorpt_T_max    0.775
_exptl_absorpt_correction_type    'multi-scan' 
_exptl_absorpt_correction_T_min   0.5812
_exptl_absorpt_correction_T_max   0.7533
_exptl_absorpt_process_details
;
Sheldrick, G.M. (2013). SADABS. Bruker AXS Inc. Madison, WI USA.
;
_exptl_absorpt_special_details    ?
_diffrn_ambient_temperature       100(2)
_diffrn_radiation_wavelength      1.54178
_diffrn_radiation_type            CuK\a
_diffrn_source                    'microfocus sealed tube'
_diffrn_source_type               'Incoatec I\uS'
_diffrn_radiation_monochromator   mirrors 
_diffrn_measurement_device_type   'Bruker Kappa DUO CCD diffractometer'
_diffrn_measurement_method        '\f and \w scans'  
_diffrn_detector_area_resol_mean  ?
_diffrn_reflns_number             21833
_diffrn_reflns_av_unetI/netI      0.0375
_diffrn_reflns_av_R_equivalents   0.0850
_diffrn_reflns_limit_h_min        -7
_diffrn_reflns_limit_h_max        7
_diffrn_reflns_limit_k_min        -11
_diffrn_reflns_limit_k_max        11
_diffrn_reflns_limit_l_min        -22
_diffrn_reflns_limit_l_max        22
_diffrn_reflns_theta_min          4.711
_diffrn_reflns_theta_max          70.124
_diffrn_reflns_theta_full         67.679
_diffrn_measured_fraction_theta_max   0.995
_diffrn_measured_fraction_theta_full  1.000
_diffrn_reflns_Laue_measured_fraction_max    0.995
_diffrn_reflns_Laue_measured_fraction_full   1.000
_diffrn_reflns_point_group_measured_fraction_max   0.996
_diffrn_reflns_point_group_measured_fraction_full  1.000
_reflns_number_total              2174
_reflns_number_gt                 2052
_reflns_threshold_expression      'I > 2\s(I)'
_reflns_Friedel_coverage          0.690
_reflns_Friedel_fraction_max      0.998
_reflns_Friedel_fraction_full     1.000
 
_reflns_special_details
;
 Reflections were merged by SHELXL according to the crystal
 class for the calculation of statistics and refinement.
 
 _reflns_Friedel_fraction is defined as the number of unique
 Friedel pairs measured divided by the number that would be
 possible theoretically, ignoring centric projections and
 systematic absences.
;
 
_computing_data_collection        'APEX2 (Bruker, 2014)'
_computing_cell_refinement        'SAINT (Bruker, 2014)'
_computing_data_reduction         'SAINT (Bruker, 2014)'
_computing_structure_solution     'SHELXL-2014 (Sheldrick, 2014)'
_computing_structure_refinement   'SHELXL-2014 (Sheldrick, 2014)'
_computing_molecular_graphics     'Bruker SHELXTL'
_computing_publication_material   'Bruker SHELXTL'
_refine_special_details
;
 Refined as a 2-component inversion twin.
;
_refine_ls_structure_factor_coef  Fsqd
_refine_ls_matrix_type            full
_refine_ls_weighting_scheme       calc
_refine_ls_weighting_details
'w=1/[\s^2^(Fo^2^)+(0.0672P)^2^+0.9340P] where P=(Fo^2^+2Fc^2^)/3'
_atom_sites_solution_primary      direct
_atom_sites_solution_secondary    difmap
_atom_sites_solution_hydrogens    mixed
_refine_ls_hydrogen_treatment     mixed
_refine_ls_extinction_method      none
_refine_ls_extinction_coef        na
_refine_ls_abs_structure_details
;
 Refined as an inversion twin.
;
_refine_ls_abs_structure_Flack    0.04(3)
_chemical_absolute_configuration  ad
_refine_ls_number_reflns          2174
_refine_ls_number_parameters      158
_refine_ls_number_restraints      1
_refine_ls_R_factor_all           0.0508
_refine_ls_R_factor_gt            0.0477
_refine_ls_wR_factor_ref          0.1249
_refine_ls_wR_factor_gt           0.1231
_refine_ls_goodness_of_fit_ref    1.104
_refine_ls_restrained_S_all       1.104
_refine_ls_shift/su_max           0.000
_refine_ls_shift/su_mean          0.000
 
loop_
 _atom_site_label
 _atom_site_type_symbol
 _atom_site_fract_x
 _atom_site_fract_y
 _atom_site_fract_z
 _atom_site_U_iso_or_equiv
 _atom_site_adp_type
 _atom_site_occupancy
 _atom_site_site_symmetry_order  
 _atom_site_calc_flag
 _atom_site_refinement_flags_posn
 _atom_site_refinement_flags_adp
 _atom_site_refinement_flags_occupancy
 _atom_site_disorder_assembly
 _atom_site_disorder_group
Cl1 Cl 0.4358(3) 0.51854(17) 0.14572(7) 0.0530(4) Uani 1 1 d . . . . .
Cl2 Cl 1.0519(2) 0.82132(16) 0.26764(8) 0.0499(4) Uani 1 1 d . . . . .
F1 F 0.2513(4) 0.6298(4) 0.41926(17) 0.0401(8) Uani 1 1 d . . . . .
F2 F 0.5227(5) 0.7185(3) 0.47237(15) 0.0333(6) Uani 1 1 d . . . . .
F3 F 0.3532(5) 0.5515(3) 0.52035(16) 0.0389(7) Uani 1 1 d . . . . .
O1 O 0.9760(6) 0.2652(4) 0.46180(19) 0.0379(9) Uani 1 1 d . . . . .
O2 O 0.4503(6) 0.3794(3) 0.40849(16) 0.0299(7) Uani 1 1 d D . . . .
H2O H 0.461(11) 0.331(6) 0.444(2) 0.045 Uiso 1 1 d D U . . .
C1 C 0.9085(8) 0.3653(5) 0.4328(3) 0.0335(11) Uani 1 1 d . . . . .
H1 H 0.9485 0.3800 0.3846 0.040 Uiso 1 1 calc R U . . .
C2 C 0.7654(7) 0.4689(5) 0.4674(2) 0.0232(9) Uani 1 1 d . . . . .
H2A H 0.8469 0.5536 0.4759 0.028 Uiso 1 1 calc R U . . .
H2B H 0.7159 0.4341 0.5141 0.028 Uiso 1 1 calc R U . . .
C3 C 0.5701(7) 0.4999(4) 0.4199(2) 0.0217(9) Uani 1 1 d . . . . .
C4 C 0.6306(7) 0.5582(4) 0.3469(2) 0.0221(9) Uani 1 1 d . . . . .
C5 C 0.5185(7) 0.5160(5) 0.2867(2) 0.0287(10) Uani 1 1 d . . . . .
H5 H 0.4066 0.4510 0.2903 0.034 Uiso 1 1 calc R U . . .
C6 C 0.5747(8) 0.5715(5) 0.2210(2) 0.0317(10) Uani 1 1 d . . . . .
C7 C 0.7386(8) 0.6632(5) 0.2131(3) 0.0325(11) Uani 1 1 d . . . . .
H7 H 0.7768 0.6981 0.1677 0.039 Uiso 1 1 calc R U . . .
C8 C 0.8458(8) 0.7026(5) 0.2741(3) 0.0311(11) Uani 1 1 d . . . . .
C9 C 0.7913(7) 0.6550(5) 0.3410(2) 0.0249(9) Uani 1 1 d . . . . .
H9 H 0.8626 0.6880 0.3822 0.030 Uiso 1 1 calc R U . . .
C10 C 0.4240(7) 0.6010(5) 0.4582(2) 0.0280(10) Uani 1 1 d . . . . .
 
loop_
 _atom_site_aniso_label
 _atom_site_aniso_U_11
 _atom_site_aniso_U_22
 _atom_site_aniso_U_33
 _atom_site_aniso_U_23
 _atom_site_aniso_U_13
 _atom_site_aniso_U_12
Cl1 0.0713(10) 0.0597(9) 0.0280(6) 0.0017(6) -0.0131(6) -0.0232(8)
Cl2 0.0471(7) 0.0589(9) 0.0438(7) 0.0206(6) -0.0060(6) -0.0262(7)
F1 0.0176(12) 0.057(2) 0.0453(17) -0.0014(16) -0.0018(11) 0.0096(13)
F2 0.0330(15) 0.0253(13) 0.0416(15) -0.0101(11) 0.0026(12) 0.0038(12)
F3 0.0379(15) 0.0467(18) 0.0321(14) 0.0031(13) 0.0158(12) 0.0039(14)
O1 0.0394(19) 0.0337(19) 0.041(2) 0.0101(15) 0.0000(16) 0.0083(16)
O2 0.0370(17) 0.0259(15) 0.0269(16) 0.0032(13) -0.0028(14) -0.0138(16)
C1 0.034(2) 0.038(3) 0.029(2) 0.007(2) 0.004(2) 0.009(2)
C2 0.023(2) 0.025(2) 0.022(2) 0.0044(18) 0.0025(16) 0.0013(19)
C3 0.0211(18) 0.020(2) 0.024(2) -0.0015(16) 0.0004(16) -0.0033(19)
C4 0.025(2) 0.019(2) 0.022(2) 0.0014(17) 0.0011(16) 0.0016(17)
C5 0.031(2) 0.025(2) 0.030(2) -0.0007(18) -0.0008(18) -0.004(2)
C6 0.037(2) 0.032(2) 0.026(2) -0.0013(18) -0.0057(19) 0.000(2)
C7 0.040(3) 0.031(2) 0.027(2) 0.009(2) 0.0006(19) 0.000(2)
C8 0.032(2) 0.031(2) 0.030(3) 0.010(2) -0.0021(19) -0.003(2)
C9 0.021(2) 0.027(2) 0.027(2) 0.0023(18) -0.0036(16) 0.0002(19)
C10 0.021(2) 0.033(2) 0.031(2) -0.0033(18) 0.0032(18) 0.000(2)
 
_geom_special_details
;
 All esds (except the esd in the dihedral angle between two l.s. planes)
 are estimated using the full covariance matrix.  The cell esds are taken
 into account individually in the estimation of esds in distances, angles
 and torsion angles; correlations between esds in cell parameters are only
 used when they are defined by crystal symmetry.  An approximate (isotropic)
 treatment of cell esds is used for estimating esds involving l.s. planes.
;
 
loop_
 _geom_bond_atom_site_label_1
 _geom_bond_atom_site_label_2
 _geom_bond_distance
 _geom_bond_site_symmetry_2
 _geom_bond_publ_flag
Cl1 C6 1.738(5) . ?
Cl2 C8 1.743(5) . ?
F1 C10 1.334(6) . ?
F2 C10 1.336(6) . ?
F3 C10 1.339(6) . ?
O1 C1 1.201(6) . ?
O2 C3 1.418(5) . ?
O2 H2O 0.83(3) . ?
C1 C2 1.504(7) . ?
C1 H1 0.9500 . ?
C2 C3 1.543(6) . ?
C2 H2A 0.9900 . ?
C2 H2B 0.9900 . ?
C3 C10 1.529(6) . ?
C3 C4 1.533(6) . ?
C4 C9 1.388(6) . ?
C4 C5 1.393(6) . ?
C5 C6 1.394(6) . ?
C5 H5 0.9500 . ?
C6 C7 1.373(8) . ?
C7 C8 1.382(7) . ?
C7 H7 0.9500 . ?
C8 C9 1.383(6) . ?
C9 H9 0.9500 . ?
 
loop_
 _geom_angle_atom_site_label_1
 _geom_angle_atom_site_label_2
 _geom_angle_atom_site_label_3
 _geom_angle
 _geom_angle_site_symmetry_1
 _geom_angle_site_symmetry_3
 _geom_angle_publ_flag
C3 O2 H2O 108(5) . . ?
O1 C1 C2 124.6(4) . . ?
O1 C1 H1 117.7 . . ?
C2 C1 H1 117.7 . . ?
C1 C2 C3 110.8(4) . . ?
C1 C2 H2A 109.5 . . ?
C3 C2 H2A 109.5 . . ?
C1 C2 H2B 109.5 . . ?
C3 C2 H2B 109.5 . . ?
H2A C2 H2B 108.1 . . ?
O2 C3 C10 107.4(3) . . ?
O2 C3 C4 108.0(3) . . ?
C10 C3 C4 108.9(4) . . ?
O2 C3 C2 109.8(3) . . ?
C10 C3 C2 109.2(4) . . ?
C4 C3 C2 113.3(3) . . ?
C9 C4 C5 120.3(4) . . ?
C9 C4 C3 120.4(4) . . ?
C5 C4 C3 119.3(4) . . ?
C4 C5 C6 118.3(4) . . ?
C4 C5 H5 120.8 . . ?
C6 C5 H5 120.8 . . ?
C7 C6 C5 122.7(4) . . ?
C7 C6 Cl1 118.9(4) . . ?
C5 C6 Cl1 118.4(4) . . ?
C6 C7 C8 117.2(4) . . ?
C6 C7 H7 121.4 . . ?
C8 C7 H7 121.4 . . ?
C7 C8 C9 122.6(5) . . ?
C7 C8 Cl2 119.2(4) . . ?
C9 C8 Cl2 118.2(4) . . ?
C8 C9 C4 118.8(4) . . ?
C8 C9 H9 120.6 . . ?
C4 C9 H9 120.6 . . ?
F1 C10 F2 107.4(4) . . ?
F1 C10 F3 106.7(4) . . ?
F2 C10 F3 107.0(4) . . ?
F1 C10 C3 111.3(4) . . ?
F2 C10 C3 112.4(4) . . ?
F3 C10 C3 111.8(4) . . ?
 
loop_
 _geom_torsion_atom_site_label_1
 _geom_torsion_atom_site_label_2
 _geom_torsion_atom_site_label_3
 _geom_torsion_atom_site_label_4
 _geom_torsion
 _geom_torsion_site_symmetry_1
 _geom_torsion_site_symmetry_2
 _geom_torsion_site_symmetry_3
 _geom_torsion_site_symmetry_4
 _geom_torsion_publ_flag
O1 C1 C2 C3 -130.6(5) . . . . ?
C1 C2 C3 O2 60.1(5) . . . . ?
C1 C2 C3 C10 177.7(4) . . . . ?
C1 C2 C3 C4 -60.7(5) . . . . ?
O2 C3 C4 C9 -163.6(4) . . . . ?
C10 C3 C4 C9 80.0(5) . . . . ?
C2 C3 C4 C9 -41.7(5) . . . . ?
O2 C3 C4 C5 18.2(5) . . . . ?
C10 C3 C4 C5 -98.1(5) . . . . ?
C2 C3 C4 C5 140.1(4) . . . . ?
C9 C4 C5 C6 1.1(7) . . . . ?
C3 C4 C5 C6 179.3(4) . . . . ?
C4 C5 C6 C7 1.6(8) . . . . ?
C4 C5 C6 Cl1 179.8(4) . . . . ?
C5 C6 C7 C8 -1.6(8) . . . . ?
Cl1 C6 C7 C8 -179.8(4) . . . . ?
C6 C7 C8 C9 -1.0(8) . . . . ?
C6 C7 C8 Cl2 -178.7(4) . . . . ?
C7 C8 C9 C4 3.7(7) . . . . ?
Cl2 C8 C9 C4 -178.6(4) . . . . ?
C5 C4 C9 C8 -3.6(7) . . . . ?
C3 C4 C9 C8 178.2(4) . . . . ?
O2 C3 C10 F1 -60.3(5) . . . . ?
C4 C3 C10 F1 56.4(5) . . . . ?
C2 C3 C10 F1 -179.3(4) . . . . ?
O2 C3 C10 F2 179.3(3) . . . . ?
C4 C3 C10 F2 -64.0(5) . . . . ?
C2 C3 C10 F2 60.2(5) . . . . ?
O2 C3 C10 F3 58.9(5) . . . . ?
C4 C3 C10 F3 175.6(4) . . . . ?
C2 C3 C10 F3 -60.2(5) . . . . ?
 
loop_
 _geom_hbond_atom_site_label_D 
 _geom_hbond_atom_site_label_H 
 _geom_hbond_atom_site_label_A 
 _geom_hbond_distance_DH 
 _geom_hbond_distance_HA 
 _geom_hbond_distance_DA 
 _geom_hbond_angle_DHA 
 _geom_hbond_site_symmetry_A 
O2 H2O O1  0.83(3) 2.00(3) 2.825(5) 173(6) 4_456
 
_refine_diff_density_max    0.590
_refine_diff_density_min   -0.259
_refine_diff_density_rms    0.078

_shelx_res_file
;

    sad_a.res created by SHELXL-2014/7


TITL sad_a.res in P2(1)2(1)2(1)
CELL  1.54178   6.2490   9.8370  18.7718   90.000   90.000   90.000
ZERR   4.000   0.0004   0.0006   0.0010    0.000    0.000    0.000
LATT -1
SYMM 1/2-X, -Y, 1/2+Z
SYMM -X, 1/2+Y, 1/2-Z
SYMM 1/2+X, 1/2-Y, -Z
SFAC C  H  O  F  Cl
UNIT 40 28 8 12 8

L.S. 10
BOND $H
FMAP 2
PLAN 20
SIZE 0.34 0.08 0.05
TEMP -173
CONF
EQIV $1 x-1/2, -y+1/2, -z+1
HTAB O2 O1_$1
ACTA
TWIN
DFIX 0.84 O2 H2O
WGHT    0.067200    0.934000
BASF   0.03602
FVAR       0.68531
CL1   5    0.435756    0.518542    0.145715    11.00000    0.07133    0.05968 =
         0.02796    0.00170   -0.01307   -0.02322
CL2   5    1.051916    0.821316    0.267642    11.00000    0.04710    0.05888 =
         0.04383    0.02060   -0.00597   -0.02620
F1    4    0.251294    0.629820    0.419258    11.00000    0.01760    0.05746 =
         0.04533   -0.00140   -0.00183    0.00956
F2    4    0.522675    0.718452    0.472365    11.00000    0.03298    0.02530 =
         0.04164   -0.01007    0.00256    0.00380
F3    4    0.353155    0.551523    0.520347    11.00000    0.03789    0.04671 =
         0.03208    0.00308    0.01579    0.00385
O1    3    0.975972    0.265200    0.461796    11.00000    0.03940    0.03368 =
         0.04061    0.01011    0.00004    0.00834
O2    3    0.450284    0.379417    0.408487    11.00000    0.03702    0.02588 =
         0.02691    0.00322   -0.00280   -0.01384
H2O   2    0.460857    0.331004    0.444392    11.00000   -1.50000
C1    1    0.908542    0.365286    0.432803    11.00000    0.03381    0.03773 =
         0.02907    0.00720    0.00424    0.00943
AFIX  43
H1    2    0.948477    0.380034    0.384588    11.00000   -1.20000
AFIX   0
C2    1    0.765370    0.468892    0.467439    11.00000    0.02343    0.02468 =
         0.02154    0.00437    0.00247    0.00127
AFIX  23
H2A   2    0.846948    0.553639    0.475902    11.00000   -1.20000
H2B   2    0.715917    0.434067    0.514100    11.00000   -1.20000
AFIX   0
C3    1    0.570063    0.499914    0.419862    11.00000    0.02113    0.01961 =
         0.02446   -0.00149    0.00037   -0.00326
C4    1    0.630602    0.558236    0.346876    11.00000    0.02487    0.01937 =
         0.02212    0.00144    0.00113    0.00160
C5    1    0.518486    0.516000    0.286655    11.00000    0.03083    0.02498 =
         0.03036   -0.00066   -0.00077   -0.00415
AFIX  43
H5    2    0.406592    0.450991    0.290282    11.00000   -1.20000
AFIX   0
C6    1    0.574663    0.571548    0.220957    11.00000    0.03726    0.03196 =
         0.02600   -0.00131   -0.00568    0.00046
C7    1    0.738611    0.663227    0.213133    11.00000    0.03967    0.03108 =
         0.02683    0.00892    0.00063    0.00045
AFIX  43
H7    2    0.776790    0.698137    0.167691    11.00000   -1.20000
AFIX   0
C8    1    0.845760    0.702598    0.274117    11.00000    0.03240    0.03062 =
         0.03043    0.01046   -0.00212   -0.00268
C9    1    0.791331    0.655021    0.341025    11.00000    0.02145    0.02661 =
         0.02659    0.00230   -0.00356    0.00019
AFIX  43
H9    2    0.862647    0.687975    0.382248    11.00000   -1.20000
AFIX   0
C10   1    0.424033    0.600982    0.458192    11.00000    0.02053    0.03283 =
         0.03052   -0.00328    0.00323    0.00024
HKLF 4

REM  sad_a.res in P2(1)2(1)2(1)
REM R1 =  0.0477 for    2052 Fo > 4sig(Fo)  and  0.0508 for all    2174 data
REM    158 parameters refined using      1 restraints

END

WGHT      0.0670      0.9401

REM Highest difference peak  0.590,  deepest hole -0.259,  1-sigma level  0.078
Q1    1   0.2799  0.5295  0.1585  11.00000  0.05    0.59
Q2    1   0.5904  0.4469  0.1408  11.00000  0.05    0.49
Q3    1   1.0444  0.7321  0.2415  11.00000  0.05    0.43
Q4    1   0.3187  0.4136  0.3964  11.00000  0.05    0.39
Q5    1   0.9281  0.8687  0.2743  11.00000  0.05    0.37
Q6    1   0.6002  0.5354  0.3763  11.00000  0.05    0.29
Q7    1   0.9323  0.7570  0.2620  11.00000  0.05    0.27
Q8    1   0.7520  0.5826  0.3389  11.00000  0.05    0.27
Q9    1   0.8426  0.2358  0.4548  11.00000  0.05    0.27
Q10   1   0.4392  0.5139  0.4227  11.00000  0.05    0.26
Q11   1   0.8477  0.6467  0.3033  11.00000  0.05    0.24
Q12   1   0.6031  0.7042  0.4448  11.00000  0.05    0.24
Q13   1   0.8118  0.6672  0.2436  11.00000  0.05    0.23
Q14   1   0.5522  0.5640  0.3226  11.00000  0.05    0.23
Q15   1   0.5760  0.5538  0.1572  11.00000  0.05    0.23
Q16   1   0.5639  0.4232  0.4147  11.00000  0.05    0.23
Q17   1   0.6651  0.4854  0.4455  11.00000  0.05    0.23
Q18   1   0.2890  0.6187  0.5198  11.00000  0.05    0.22
Q19   1   0.7617  0.3474  0.4585  11.00000  0.05    0.21
Q20   1   0.5956  0.3953  0.4364  11.00000  0.05    0.21
;
_shelx_res_checksum   58923

_shelx_hkl_file
;
  -1   0   0   -6.80    3.80
   1   0   0   -1.20    5.30
  -2   0   0 4290.47  358.76
  -2   0   0 4632.14  358.56
   2   0   0 4641.24  358.66
   2   0   0 4687.23  360.46
   2   0   0 4325.47  358.16
   2   0   0 4685.03  358.76
   2   0   0 4273.97  358.16
   2   0   0 4697.93  358.56
  -3   0   0    5.30    6.10
  -3   0   0    3.90    5.90
  -3   0   0   10.00    5.80
   3   0   0   12.50    4.20
   3   0   0    8.60    5.10
   3   0   0    7.30    3.90
   3   0   0    8.40    4.80
   3   0   0    4.70    5.50
  -4   0   0  598.64   52.79
  -4   0   0  615.74   50.09
  -4   0   0  659.63   52.79
   4   0   0  590.24   52.69
   4   0   0  616.44   51.19
   4   0   0  647.14   52.19
  -5   0   0    6.30    4.30
  -5   0   0   -1.00    4.10
  -5   0   0    1.80    7.80
  -5   0   0    9.80    6.40
   5   0   0    8.70    8.00
  -6   0   0  339.27   28.30
  -6   0   0  323.97   28.10
  -6   0   0  328.27   28.30
   6   0   0  345.67   30.20
   6   0   0  317.27   27.90
   6   0   0  337.07   29.50
   6   0   0  342.07   29.40
  -7   0   0    1.00    3.70
  -7   0   0    0.70    3.30
  -7   0   0   -4.50    6.50
   7   0   0    8.60    5.40
   7   0   0   -1.60    4.70
   7   0   0   -0.40    5.70
   7  -1   0   -1.90    4.50
   7  -1   0   -1.30    5.90
   7  -1   0    0.30    5.50
  -7   1   0   -7.60    6.80
  -7   1   0    2.20    3.10
  -7   1   0    0.00    2.80
   6  -1   0  200.98   20.40
   6  -1   0  201.38   21.70
   6  -1   0  209.38   21.10
  -6   1   0  212.88   18.50
  -6   1   0  203.68   18.80
  -6   1   0  231.98   19.20
  -6   1   0  206.78   18.90
   5  -1   0    1.10    7.90
  -5   1   0    1.70    4.30
  -5   1   0    4.40    4.30
  -5   1   0    4.60    6.90
  -5   1   0   14.30    6.50
  -5   1   0    2.30    8.30
   4  -1   0 1374.76  119.19
   4  -1   0 1409.96  120.49
   4  -1   0 1504.65  120.09
   4  -1   0 1500.65  119.29
  -4   1   0 1497.45  118.19
  -4   1   0 1629.74  120.49
  -4   1   0 1472.45  120.39
   3  -1   0   43.00    7.30
   3  -1   0   50.19    9.10
   3  -1   0   49.30    8.30
   3  -1   0   34.10    7.60
  -3   1   0   37.90    8.00
  -3   1   0   49.50   10.10
  -3   1   0   43.80   10.40
   2  -1   0  495.95   37.80
   2  -1   0  474.15   38.20
   2  -1   0  445.76   37.40
   2  -1   0  485.05   37.60
   2  -1   0  439.66   37.50
  -2   1   0  421.46   38.00
  -2   1   0  436.26   37.80
   0  -1   0   -4.80    2.30
   0   1   0   -0.90    2.20
  -1  -1   0  176.98   18.00
   1   1   0  192.68   18.80
  -2  -1   0  404.06   37.70
   2   1   0  490.55   38.20
   2   1   0  467.55   37.90
   2   1   0  475.75   37.60
   2   1   0  440.96   37.00
   2   1   0  452.55   37.20
   2   1   0  492.95   41.30
   2   1   0  461.85   37.20
  -3  -1   0   38.30    7.90
  -3  -1   0   36.30    7.60
  -3  -1   0   32.50    6.80
   3   1   0   39.20    7.20
   3   1   0   40.60    9.10
   3   1   0   37.30    8.10
   3   1   0   42.10    6.80
  -4  -1   0 1487.95  114.99
  -4  -1   0 1288.07  117.29
  -4  -1   0 1501.55  117.39
   4   1   0 1436.46  115.99
   4   1   0 1476.65  117.29
   4   1   0 1485.85  117.19
  -5  -1   0    4.20    6.40
  -5  -1   0    4.70    4.10
  -5  -1   0    6.80    4.40
  -5  -1   0   11.50    8.30
   5   1   0    4.60    6.90
  -6  -1   0  218.28   20.10
  -6  -1   0  219.28   19.90
   6   1   0  223.88   21.10
   6   1   0  212.08   22.20
   6   1   0  236.18   21.10
   6   1   0  214.88   19.60
  -7  -1   0    1.50    6.10
  -7  -1   0   -0.90    3.60
  -7  -1   0   -0.80    3.40
   7   1   0   -1.80    4.80
   7   1   0    1.80    2.90
   7   1   0    6.30    5.40
   7  -2   0   14.30    5.70
   7  -2   0    8.80    6.80
   7  -2   0    9.90    5.40
  -7   2   0   15.70    7.80
  -7   2   0   18.20    3.70
   6  -2   0   81.09   15.10
   6  -2   0   86.99   12.40
   6  -2   0   96.39   13.40
   6  -2   0   88.59   10.80
   6  -2   0   66.09   13.60
  -6   2   0   87.59    9.90
  -6   2   0   76.69   14.10
  -6   2   0   90.79    9.80
   5  -2   0   76.29   16.80
   5  -2   0   93.89   15.60
   5  -2   0   66.69   14.70
  -5   2   0   84.49   16.20
  -5   2   0   94.99   10.90
  -5   2   0   90.49   14.10
  -5   2   0   78.09    9.80
   4  -2   0  347.57   29.90
   4  -2   0  285.27   31.60
   4  -2   0  315.87   30.40
   4  -2   0  339.87   29.50
  -4   2   0  328.47   28.00
  -4   2   0  343.27   30.70
  -4   2   0  371.06   31.30
  -4   2   0  347.27   31.10
   3  -2   0  163.38   16.20
   3  -2   0  157.88   15.10
   3  -2   0  131.49   16.70
  -3   2   0  140.59   16.10
  -3   2   0  153.68   15.90
  -3   2   0  161.48   16.40
   2  -2   0   46.30    8.00
   2  -2   0   43.50    9.60
   2  -2   0   40.80    7.20
   2  -2   0   47.80    8.10
  -2   2   0   36.20    7.90
  -2   2   0   50.99   12.00
  -2   2   0   35.30   15.40
  -2   2   0   51.79    8.80
   1  -2   0 4531.55  357.66
   1  -2   0 4562.64  357.86
   1  -2   0 4483.15  359.06
   1  -2   0 4699.13  358.46
  -1   2   0 4516.45  358.66
  -1   2   0 4339.37  357.66
   0  -2   0 1190.28   86.09
   0   2   0  961.70   85.89
  -1  -2   0 4577.74  361.46
   1   2   0 4564.94  360.26
   1   2   0 4352.66  360.56
   1   2   0 4574.94  360.36
   1   2   0 4641.44  361.96
   1   2   0 4633.74  360.36
  -2  -2   0   48.80   11.20
   2   2   0   50.69    6.60
   2   2   0   46.20    6.60
   2   2   0   44.00    8.00
   2   2   0   51.49    8.30
   2   2   0   61.59   11.90
  -3  -2   0  137.89   15.90
  -3  -2   0   92.19   16.90
   3   2   0  149.79   13.40
   3   2   0  145.49   15.00
   3   2   0  158.28   15.10
  -4  -2   0  290.87   30.70
  -4  -2   0  335.67   26.90
   4   2   0  330.87   29.70
   4   2   0  353.86   30.50
  -5  -2   0   84.89   15.30
  -5  -2   0   91.29    9.70
  -5  -2   0   73.89   12.60
   5   2   0   66.59   15.10
   5   2   0   64.89   11.50
   5   2   0  112.19   13.40
   5   2   0   85.79   13.80
  -6  -2   0   90.09   11.30
  -6  -2   0   88.79   10.80
   6   2   0   87.39   12.60
   6   2   0   85.29   13.70
   6   2   0   92.09   10.80
   6   2   0   94.89   13.80
  -7  -2   0   14.40    4.10
  -7  -2   0   13.40    3.70
   7   2   0   15.80    5.00
   7   2   0   18.40    5.20
   7   2   0   14.30    3.60
   7  -3   0   83.59   11.10
   7  -3   0   61.89   10.00
  -7   3   0   82.59   11.50
  -7   3   0   74.29    8.00
   6  -3   0   19.40    9.20
   6  -3   0   18.20    6.10
   6  -3   0   31.00    8.80
  -6   3   0   21.70    4.90
  -6   3   0   16.30    3.80
  -6   3   0   28.10    9.00
   5  -3   0   15.50    9.00
   5  -3   0   22.90    6.70
   5  -3   0   14.40    5.30
  -5   3   0   16.10    8.70
  -5   3   0   13.20    7.80
  -5   3   0   25.60    6.20
  -5   3   0   29.20    5.40
   4  -3   0   67.79   11.20
   4  -3   0   81.89   15.30
   4  -3   0   65.39   11.90
   4  -3   0   66.39   12.90
  -4   3   0   60.79   11.10
  -4   3   0   73.09   13.30
   3  -3   0  709.13   62.59
   3  -3   0  760.22   62.09
   3  -3   0  768.52   61.79
  -3   3   0  695.33   61.49
  -3   3   0  738.13   61.29
  -3   3   0  828.12   61.79
   2  -3   0  134.49   13.20
   2  -3   0  127.29   13.60
   2  -3   0  136.79   15.70
   2  -3   0  101.29   12.30
  -2   3   0  118.09   13.50
  -2   3   0  115.39   12.10
  -2   3   0  124.29   13.10
  -2   3   0  159.68   24.00
   1  -3   0  722.33   59.39
   1  -3   0  782.52   61.19
   1  -3   0  757.52   61.59
   1  -3   0  757.42   59.79
  -1   3   0  813.42   66.19
  -1   3   0  654.53   58.99
  -1   3   0  702.73   59.79
  -1   3   0  747.43   59.09
   0  -3   0   -6.90    5.30
   0  -3   0    1.60    2.80
   0  -3   0   -2.00    4.00
   0  -3   0   -1.40    7.60
   0   3   0   -0.30    4.80
   0   3   0   -0.90    3.70
   0   3   0   -4.90    3.30
  -1  -3   0  829.82   61.69
  -1  -3   0  709.83   59.89
   1   3   0  832.62   60.39
   1   3   0  664.13   60.49
   1   3   0  711.43   59.99
   1   3   0  764.62   62.89
   1   3   0  766.12   60.39
  -2  -3   0  132.39   15.80
   2   3   0  149.39   13.10
   2   3   0  133.39   12.70
   2   3   0  120.09   13.70
   2   3   0  124.29   12.20
   3   3   0  774.42   65.19
   3   3   0  810.62   66.09
   3   3   0  819.92   64.59
  -4  -3   0   53.09   12.90
   4   3   0   52.09   11.90
   4   3   0   57.09   10.30
  -5  -3   0   21.00    4.60
   5   3   0   24.00    5.10
   5   3   0   13.80    5.90
   5   3   0    4.00    6.20
  -6  -3   0   18.50    4.90
  -6  -3   0   21.70    5.30
   6   3   0   25.20    6.40
   6   3   0   18.80    5.00
   6   3   0   33.20    6.90
  -7  -3   0   62.29    7.50
   7   3   0   56.09    9.80
   7  -4   0   13.80    5.80
   7  -4   0    3.30    5.10
  -7   4   0    5.60    3.20
  -7   4   0    7.90    5.30
   6  -4   0   75.59   11.90
   6  -4   0   62.29   15.10
  -6   4   0   76.09   13.00
  -6   4   0   83.99    9.30
   5  -4   0   60.89   11.40
   5  -4   0   44.80   10.70
  -5   4   0   42.70   10.10
  -5   4   0   48.00    8.10
  -5   4   0   45.30   13.00
   4  -4   0    3.40    6.00
   4  -4   0   -1.40    6.60
   4  -4   0   12.60    8.50
   4  -4   0    5.40    7.30
  -4   4   0   14.60    7.60
   3  -4   0 1065.19   93.49
   3  -4   0 1084.39   92.69
   3  -4   0 1152.18   92.99
  -3   4   0 1158.98   92.49
  -3   4   0 1234.58   92.79
   2  -4   0 1195.18   99.19
   2  -4   0 1217.88  100.99
   2  -4   0 1217.98   99.49
  -2   4   0 1344.47   99.39
  -2   4   0 1190.08   99.29
   1  -4   0   26.00    6.30
   1  -4   0   12.10    4.20
   1  -4   0   25.60    8.00
   1  -4   0   15.60    9.60
  -1   4   0    6.90    4.60
  -1   4   0   12.70    5.80
  -1   4   0   10.70    4.20
   0  -4   0  357.96   29.80
   0  -4   0  295.47   25.70
   0  -4   0  313.37   28.10
   0  -4   0  290.47   26.50
   0   4   0  271.37   27.40
   0   4   0  330.97   26.90
   0   4   0  337.37   26.30
  -1  -4   0    3.50    4.50
   1   4   0   22.50    6.90
   1   4   0   17.60    4.70
   1   4   0   15.60    4.60
   1   4   0   18.70    5.40
   1   4   0   30.70    5.60
   2   4   0 1272.87   97.79
   2   4   0 1242.98   97.99
   2   4   0 1212.28   97.39
   2   4   0 1158.98   98.49
   3   4   0 1074.09   88.39
   3   4   0 1100.99   88.49
   3   4   0 1114.79   89.79
   3   4   0 1098.99   87.79
  -4  -4   0    5.60    6.90
   4   4   0   10.40    7.40
   4   4   0   15.70    5.70
  -5  -4   0   60.69   10.90
   5   4   0   42.90    8.40
   5   4   0   48.20    9.70
  -6  -4   0   69.29    8.50
   6   4   0   74.09   11.40
   6   4   0   82.49    9.60
   7   4   0    8.80    2.80
   6  -5   0    3.40    8.20
   6  -5   0    5.60    6.10
  -6   5   0    4.20    6.50
  -6   5   0    0.10    4.00
   5  -5   0  229.78   24.50
   5  -5   0  235.08   22.00
  -5   5   0  252.07   23.10
  -5   5   0  213.48   19.50
  -5   5   0  184.48   23.60
   4  -5   0   87.89   17.20
   4  -5   0   79.59   14.20
  -4   5   0   98.89   15.10
   3  -5   0   64.09   12.80
   3  -5   0   72.09   15.30
   3  -5   0   61.69   10.80
  -3   5   0   59.79   13.20
  -3   5   0   84.99   12.30
   2  -5   0  136.49   20.80
   2  -5   0  153.78   16.50
   2  -5   0  162.88   17.50
  -2   5   0  200.68   18.10
  -2   5   0  158.78   16.50
   1  -5   0  850.81   65.99
   1  -5   0  720.03   64.99
   1  -5   0  805.72   68.49
  -1   5   0  820.62   66.19
  -1   5   0  811.32   65.09
  -1   5   0  831.52   65.69
   0  -5   0   10.50    5.70
   0  -5   0    5.60   10.50
   0   5   0   -0.10    5.50
   0   5   0    0.80    7.30
   0   5   0    7.70    5.10
  -1  -5   0  867.41   69.39
  -1  -5   0  888.41   72.39
   1   5   0  876.71   69.49
   1   5   0  772.52   69.09
   1   5   0  855.71   68.79
   1   5   0  890.11   70.39
  -2  -5   0  129.69   19.30
   2   5   0  139.79   15.80
   2   5   0  157.08   15.80
   2   5   0  160.18   15.60
   3   5   0   52.19   11.80
   3   5   0   85.39   10.90
   4   5   0  100.89   15.30
   5   5   0  223.98   20.10
   6   5   0    4.60    3.70
   6  -6   0   26.00    6.70
  -6   6   0   33.90    8.50
  -6   6   0   28.30    5.40
   5  -6   0    7.80    7.20
  -5   6   0   10.40    4.10
  -5   6   0    6.70    6.30
   4  -6   0  161.18   18.50
   4  -6   0  180.28   23.90
   4  -6   0  193.18   23.00
  -4   6   0  191.28   20.80
  -4   6   0  150.08   15.90
  -4   6   0  174.28   18.00
  -4   6   0  171.28   18.40
   3  -6   0  114.99   16.50
  -3   6   0  127.09   16.40
  -3   6   0  112.29   17.50
   2  -6   0   21.40   12.20
   2  -6   0   -0.60    6.70
  -2   6   0   16.10    6.50
  -2   6   0   11.00    7.40
   1  -6   0 1733.03  145.69
   1  -6   0 1757.72  142.79
   1  -6   0 1748.72  141.29
  -1   6   0 1891.21  142.19
  -1   6   0 1706.13  142.69
  -1   6   0 1827.22  143.09
   0  -6   0  752.22   63.59
   0  -6   0  715.93   59.49
   0  -6   0  655.63   57.79
   0   6   0  773.62   60.19
   0   6   0  746.63   59.29
  -1  -6   0 1765.82  144.29
  -1  -6   0 1772.22  147.29
  -1  -6   0 1681.53  142.59
   1   6   0 1926.31  145.29
   1   6   0 1888.91  144.39
  -2  -6   0    8.00   11.10
   2   6   0   14.00    4.70
   2   6   0   14.30    6.50
   3   6   0  111.59   14.10
   5   6   0    2.20    4.10
   6   6   0   21.70    3.80
   6  -7   0    2.40    4.80
   5  -7   0   36.60    7.90
  -5   7   0   34.30    7.60
   4  -7   0    3.80   11.70
   4  -7   0   26.60    6.80
  -4   7   0    7.80    7.70
  -4   7   0   20.80    7.60
   3  -7   0  101.59   22.90
   3  -7   0  110.39   13.60
  -3   7   0  119.29   17.20
  -3   7   0   74.29   13.30
  -3   7   0  109.69   13.50
   2  -7   0   42.70   10.30
   2  -7   0   59.69   16.60
  -2   7   0   49.30   11.20
  -2   7   0   67.79   14.40
   1  -7   0   24.20    5.60
   1  -7   0   41.50   17.10
   1  -7   0   27.10    5.80
   1  -7   0   34.50   18.60
   1  -7   0   34.60    9.10
  -1   7   0   36.70   10.00
  -1   7   0   36.40    8.90
  -1   7   0   29.20    7.50
   0  -7   0    3.40    7.30
   0  -7   0   -0.70    3.50
   0  -7   0    4.40   14.60
   0  -7   0    5.10    3.00
   0   7   0    4.90    6.50
   0   7   0   -5.20    7.50
  -1  -7   0   33.50   16.00
  -1  -7   0   30.50    5.10
   1   7   0   24.20    8.00
  -2  -7   0   67.99   17.60
  -2  -7   0  107.79   38.70
   2   7   0   43.80    9.40
   3   7   0  105.69   25.90
   3   7   0   86.39   17.70
   5  -8   0    2.50    5.60
  -5   8   0   -0.80    5.60
   4  -8   0  165.38   24.10
   4  -8   0  170.68   17.00
  -4   8   0  170.58   19.10
  -4   8   0  178.98   18.10
   3  -8   0   45.60    8.70
   3  -8   0   51.29   14.90
  -3   8   0   58.99   12.70
  -3   8   0   66.39   15.10
  -3   8   0   39.60    9.40
   2  -8   0  102.19   13.10
   2  -8   0   91.49   12.50
   2  -8   0   93.69   16.90
  -2   8   0   78.59   17.60
  -2   8   0   68.99   13.60
  -2   8   0   63.19   15.60
  -2   8   0   83.59   12.80
  -2   8   0   62.89   13.70
   1  -8   0   62.09    9.60
   1  -8   0   34.50   10.10
   1  -8   0   33.10   17.40
   1  -8   0  120.29   35.70
   1  -8   0   63.29   11.20
  -1   8   0   84.49   18.00
  -1   8   0   71.09   17.10
  -1   8   0   81.89   13.00
  -1   8   0   52.69   10.30
   0  -8   0  116.59   41.10
   0  -8   0   27.80    9.10
   0  -8   0   12.50   16.00
   0  -8   0   19.40    5.50
   0  -8   0   14.50    4.70
   0   8   0   13.20    7.70
   0   8   0   28.90   10.70
  -1  -8   0   61.59   25.80
  -1  -8   0   30.90   18.00
  -1  -8   0   52.39    8.10
   1   8   0   33.20    9.10
   1   8   0   57.09   13.00
   1   8   0   84.69   17.40
   1   8   0   45.30   10.80
   1   8   0  100.39   23.40
  -2  -8   0   86.79    8.90
   2   8   0   68.09   15.60
   2   8   0   88.79   17.70
   2   8   0   86.69   19.00
   2   8   0   64.69   15.70
   2   8   0   67.39   13.40
   3   8   0   49.60   14.90
   3   8   0   32.30    9.90
  -5   9   0   79.69   10.40
   4  -9   0   28.20    6.20
   4  -9   0   19.00    9.80
  -4   9   0   25.20    7.50
  -4   9   0   29.10    7.00
   3  -9   0   13.10   13.20
   3  -9   0    2.50    6.60
  -3   9   0   13.10    8.20
  -3   9   0    3.80    6.90
   2  -9   0   38.20    8.20
   2  -9   0   24.40    7.70
   2  -9   0   39.40   14.60
  -2   9   0   37.90    8.20
  -2   9   0   55.69    9.50
  -2   9   0   33.40   13.50
  -2   9   0   65.89   13.40
  -2   9   0   71.59   12.50
   1  -9   0   67.99   11.80
   1  -9   0   57.49   12.90
   1  -9   0   52.79   10.90
   1  -9   0   93.89   12.10
  -1   9   0   92.19   14.00
  -1   9   0   81.99   18.60
  -1   9   0   84.69   15.60
  -1   9   0   84.89   14.80
  -1   9   0   88.89   19.10
  -1   9   0   76.89   14.30
  -1   9   0   71.19   15.10
   0  -9   0    8.10    6.20
   0  -9   0   -1.60    5.70
   0   9   0   22.30    8.50
   0   9   0   13.90    8.20
   0   9   0   40.00   11.60
   0   9   0   68.39   18.00
   0   9   0   18.70    8.80
   0   9   0   57.99   11.30
   0   9   0   17.60   12.70
  -1  -9   0   63.29   10.50
  -1  -9   0   70.39    9.20
   1   9   0   79.69   18.20
   1   9   0   66.19   13.30
   1   9   0  134.39   22.90
   1   9   0   78.09   13.70
   1   9   0   85.09   15.40
   1   9   0   65.19   12.40
   2   9   0   14.30   14.00
   2   9   0   39.70    9.60
   2   9   0   26.20    9.50
   2   9   0   24.90    8.50
   3   9   0    8.40    7.80
   3   9   0    3.70   12.80
   4   9   0   18.20    7.10
   4 -10   0   -2.90    4.40
   4 -10   0    1.70    8.10
  -4  10   0   -6.60    4.00
  -4  10   0   -0.10    5.80
  -4  10   0   -0.40    4.20
   3 -10   0   17.80   11.30
   3 -10   0   46.00    9.40
  -3  10   0   26.20    8.20
  -3  10   0   42.40    7.10
  -3  10   0   27.00    6.20
   2 -10   0  192.88   24.10
   2 -10   0  136.99   15.30
   2 -10   0  124.19   22.00
  -2  10   0  145.49   16.00
  -2  10   0  128.59   15.00
  -2  10   0  162.78   17.90
  -2  10   0  153.58   16.70
   1 -10   0   26.20   13.70
   1 -10   0   21.80    7.60
   1 -10   0   14.60    6.20
   1 -10   0    4.10    6.00
  -1  10   0   19.00    9.40
  -1  10   0   26.00   12.40
  -1  10   0    9.60    7.80
  -1  10   0   26.60   12.60
  -1  10   0   11.70    7.30
   0 -10   0    7.70    5.30
   0 -10   0   15.80    6.30
   0 -10   0  -17.60    6.60
   0  10   0    8.70    8.20
   0  10   0    3.70    7.50
   0  10   0    1.00    7.40
   0  10   0    1.00    9.60
   0  10   0   -2.20    8.10
   0  10   0    6.50   12.60
   0  10   0   11.10   11.20
  -1 -10   0   13.90    6.50
  -1 -10   0   23.70    6.30
   1  10   0    0.90   12.80
   1  10   0   18.80    9.00
   1  10   0   13.10    8.00
   1  10   0   21.60   10.50
   1  10   0   19.10    8.60
  -2 -10   0  197.78   16.30
   2  10   0  158.78   25.20
   2  10   0  155.18   17.70
   2  10   0  139.89   20.70
   3  10   0   16.50    6.90
   3  10   0    1.20   10.90
   3 -11   0   -1.60    7.50
   3 -11   0    7.00    6.60
   2 -11   0   21.60    6.70
   2 -11   0   30.00    5.80
  -2  11   0   34.10    8.00
  -2  11   0   16.80    5.30
  -2  11   0   25.10    7.30
   1 -11   0   -4.80    6.50
   1 -11   0   10.30    6.30
   1 -11   0   17.40    4.90
  -1  11   0   10.70    6.20
  -1  11   0    3.30    9.30
  -1  11   0    8.70    5.50
  -1  11   0   17.30    7.80
   0 -11   0  -15.40    5.30
   0 -11   0   -6.00    5.50
   0 -11   0    7.40    6.90
   0  11   0   11.70    6.60
   0  11   0    1.20    9.60
   0  11   0   14.00   10.80
   0  11   0    0.20    7.80
  -1 -11   0   20.40    5.00
  -1 -11   0    6.20    6.20
   1  11   0    5.00    6.40
   1  11   0    7.10    6.00
   1  11   0   15.30   10.90
   2  11   0   36.90   11.20
   2  11   0   10.90   10.20
   2  11  -1   24.80   10.20
   2  11  -1   13.50    6.60
   1  11  -1   21.30    7.70
   1  11  -1   36.70   11.30
   1  11  -1   32.50    7.30
   1  11  -1   26.50   12.00
  -1 -11   1   63.49    9.60
  -1 -11   1   38.70   10.00
   0  11  -1   16.60    6.60
   0  11  -1   12.40    5.90
   0  11  -1    7.70   10.70
   0  11  -1   11.90    8.40
   0 -11   1   16.80    7.40
   0 -11   1    8.10    6.20
   0 -11   1    9.50    5.40
  -1  11  -1   47.80    8.50
  -1  11  -1   30.60    8.80
  -1  11  -1   38.30    6.70
   1 -11   1   44.60    7.80
   1 -11   1   19.70    6.40
   1 -11   1   27.60    7.40
  -2  11  -1    2.50    4.60
  -2  11  -1   14.20    5.10
  -2  11  -1   18.10    7.30
   2 -11   1    7.00    5.60
   2 -11   1   15.50    5.50
   3 -11   1   -5.20    6.00
   3  10  -1  107.39   15.60
   3  10  -1   90.69   19.70
   2  10  -1   98.09   23.30
   2  10  -1   77.29   15.80
   2  10  -1   74.69   12.90
   1  10  -1   12.30   13.40
   1  10  -1   13.10   10.70
   1  10  -1   16.70    8.30
   1  10  -1   23.90    8.90
   1  10  -1   29.80    9.80
  -1 -10   1   24.00    7.00
  -1 -10   1   27.40    6.60
   0  10  -1   26.00   13.60
   0  10  -1   27.90    8.80
   0  10  -1   40.00    8.30
   0  10  -1   25.70   10.80
   0  10  -1   32.10    9.00
   0  10  -1   37.10   12.60
   0 -10   1   17.20    7.90
   0 -10   1   48.80   10.70
   0 -10   1   44.90   10.80
  -1  10  -1   45.60   12.70
  -1  10  -1   21.10   10.00
  -1  10  -1   15.50    8.10
  -1  10  -1   32.40    7.70
   1 -10   1   25.80    6.50
   1 -10   1   16.30   13.10
   1 -10   1    9.90    6.50
   1 -10   1   25.80    8.20
  -2  10  -1  105.79   12.30
  -2  10  -1  102.09   13.50
  -2  10  -1  104.89   14.40
  -2  10  -1   89.99   12.50
   2 -10   1   78.89   11.90
   2 -10   1   57.69   13.90
   2 -10   1   69.39   15.60
  -3  10  -1   79.49   11.20
  -3  10  -1   84.69   14.00
  -3  10  -1  106.19   12.60
   3 -10   1  116.19   12.30
   3 -10   1  108.09   17.60
  -4  10  -1   -1.40    4.20
  -4  10  -1    2.90    4.60
   4 -10   1    2.80    7.60
   4 -10   1    6.00    4.70
   3   9  -1   25.80   13.60
   3   9  -1   27.30    9.00
   2   9  -1   74.79   16.70
   2   9  -1   73.29   13.80
   2   9  -1   90.49   18.00
  -2  -9   1   80.39   10.50
   1   9  -1    9.10   13.40
   1   9  -1   26.10    9.40
   1   9  -1   27.10    8.20
   1   9  -1   32.30    8.80
   1   9  -1   22.50   11.40
   1   9  -1   20.70    9.10
  -1  -9   1   36.60    7.90
  -1  -9   1   31.30    6.50
   0   9  -1  172.58   25.80
   0   9  -1  139.09   19.10
   0   9  -1  131.69   20.50
   0   9  -1  137.39   19.50
   0   9  -1  134.79   17.50
   0   9  -1  126.89   20.80
   0   9  -1  156.58   17.10
   0  -9   1  139.49   15.30
   0  -9   1  125.09   15.20
  -1   9  -1   25.30    9.00
  -1   9  -1   39.00   12.90
  -1   9  -1   60.89   13.40
  -1   9  -1   47.80   11.70
  -1   9  -1   35.20    9.90
  -1   9  -1   36.90    8.80
   1  -9   1   15.10    6.10
   1  -9   1   29.70    7.20
   1  -9   1   26.30    7.30
   1  -9   1    6.40    7.30
  -2   9  -1   74.29   13.60
  -2   9  -1   66.99   12.50
  -2   9  -1   67.49   13.00
  -2   9  -1   90.59   20.20
  -2   9  -1   75.79   15.00
   2  -9   1   64.19   12.30
   2  -9   1   73.89   13.20
   2  -9   1  105.29   22.90
  -3   9  -1   22.40    7.60
  -3   9  -1   17.70    8.50
   3  -9   1   19.50    7.00
   3  -9   1   21.90   14.00
  -4   9  -1    5.80    6.90
  -4   9  -1    4.30    6.30
   4  -9   1    6.30    5.50
   4  -9   1   -2.70    9.90
   3   8  -1  119.59   19.50
   3   8  -1  120.49   27.10
   2   8  -1   20.50    8.90
   2   8  -1   27.50    9.60
   2   8  -1   35.10    8.50
   2   8  -1   17.10   13.30
  -2  -8   1   33.50    6.50
   1   8  -1  167.88   21.80
   1   8  -1  236.48   22.30
   1   8  -1  212.98   23.70
   1   8  -1  214.38   25.80
   1   8  -1  222.48   26.80
  -1  -8   1  267.57   47.60
  -1  -8   1  199.98   18.70
  -1  -8   1  238.58   32.00
   0   8  -1   31.50    8.60
   0   8  -1   34.90   11.70
   0  -8   1  100.19   39.30
   0  -8   1   25.10    5.50
   0  -8   1   35.60   17.20
   0  -8   1   30.70    9.20
   0  -8   1   24.90    6.00
  -1   8  -1  227.78   24.00
  -1   8  -1  230.48   21.70
  -1   8  -1  184.98   29.50
  -1   8  -1  236.28   21.40
  -1   8  -1  223.68   21.10
   1  -8   1  159.18   21.30
   1  -8   1  183.68   19.70
   1  -8   1  193.08   29.80
   1  -8   1  173.98   19.60
   1  -8   1  178.38   21.70
   1  -8   1  291.17   46.10
   1  -8   1  209.28   18.90
  -2   8  -1   22.50    8.00
  -2   8  -1   31.30   10.00
  -2   8  -1   26.80    8.70
  -2   8  -1   51.59   13.90
  -2   8  -1   17.90    8.10
   2  -8   1   18.20   13.90
   2  -8   1   33.60    7.20
   2  -8   1   27.40    7.10
  -3   8  -1  110.09   14.80
  -3   8  -1   65.29   16.50
  -3   8  -1  104.49   15.60
   3  -8   1   94.79   23.10
   3  -8   1  113.79   14.60
  -4   8  -1   52.89    9.50
  -4   8  -1   29.50    8.00
   4  -8   1   23.10   12.30
  -5   8  -1   -1.60    5.60
   5  -8   1   -5.50    9.70
   5  -8   1    8.60    5.80
   3   7  -1  340.47   34.70
   3   7  -1  365.56   37.70
   2   7  -1  115.89   15.00
  -2  -7   1  128.29   24.10
   1   7  -1   77.79   11.80
  -1  -7   1   57.19   11.40
  -1  -7   1   78.99   18.40
  -1  -7   1   58.39    7.20
   0   7  -1    8.80    7.50
   0   7  -1    9.60    6.70
   0  -7   1   10.90    7.40
   0  -7   1    6.30    3.90
   0  -7   1   23.70   14.70
   0  -7   1    8.60    3.40
  -1   7  -1   60.29   14.00
  -1   7  -1   63.29   12.60
  -1   7  -1   67.59   12.00
   1  -7   1   88.89   13.60
   1  -7   1   89.69   10.60
   1  -7   1   78.29   10.30
   1  -7   1   92.39   22.00
  -2   7  -1  111.49   17.60
  -2   7  -1  109.19   16.60
   2  -7   1  101.69   21.00
   2  -7   1   92.69   15.00
  -3   7  -1  298.77   27.40
  -3   7  -1  300.87   27.30
  -3   7  -1  311.17   29.80
   3  -7   1  313.57   33.40
   3  -7   1  280.87   26.90
  -4   7  -1   34.80    8.50
  -4   7  -1   27.30    8.00
   4  -7   1   38.60    7.10
   4  -7   1   10.20   12.10
  -5   7  -1   86.79   12.10
   5  -7   1   77.49   18.30
   5  -7   1   87.49   12.70
   6  -7   1   57.59    8.90
   6   6  -1   33.00    5.50
   5   6  -1   30.30    5.60
   3   6  -1   59.99   11.30
   3   6  -1   56.79   12.40
   2   6  -1  377.86   30.10
   2   6  -1  351.66   31.10
  -2  -6   1  316.97   35.70
  -1  -6   1   51.29   15.20
  -1  -6   1   72.09   10.80
   0   6  -1  290.87   23.00
   0   6  -1  224.48   21.60
   0  -6   1  189.08   26.70
   0  -6   1  241.08   21.90
   0  -6   1  217.78   19.40
  -1   6  -1   68.09    9.80
   1  -6   1   70.49   11.20
   1  -6   1   42.10   14.30
   1  -6   1   40.90    7.50
  -2   6  -1  308.17   29.00
  -2   6  -1  340.17   30.00
   2  -6   1  308.47   32.70
   2  -6   1  349.67   29.30
   2  -6   1  277.47   28.20
  -3   6  -1   70.59   15.30
  -3   6  -1   94.89   14.00
   3  -6   1   68.29   12.90
   3  -6   1   64.79   13.70
   3  -6   1   49.99   12.10
  -4   6  -1  262.47   24.00
  -4   6  -1  251.67   23.50
  -4   6  -1  274.97   25.70
  -4   6  -1  194.78   22.90
   4  -6   1  241.88   23.70
   4  -6   1  290.37   27.30
   4  -6   1  245.58   28.70
  -5   6  -1   47.80    8.90
  -5   6  -1   38.00    7.00
   5  -6   1   35.00    8.20
   5  -6   1   35.60   12.30
  -6   6  -1   53.59    9.50
  -6   6  -1   33.50    6.10
   6  -6   1   48.30    9.60
   6   5  -1   91.39   10.00
   5   5  -1   12.90    4.80
   4   5  -1  208.68   22.20
   4   5  -1  209.58   22.40
   3   5  -1  112.39   14.50
   3   5  -1  110.39   11.40
   3   5  -1  102.69   12.90
   3   5  -1   99.39   13.00
   2   5  -1  642.04   49.60
   2   5  -1  642.84   48.80
   2   5  -1  601.94   49.30
  -2  -5   1  514.35   49.10
   1   5  -1   49.00   11.50
   1   5  -1   47.80    7.70
   1   5  -1   56.59    9.20
   1   5  -1   45.90    8.60
  -1  -5   1   58.69    9.30
  -1  -5   1   49.40   12.60
   0   5  -1    6.70    4.70
   0   5  -1    5.80    5.40
   0   5  -1    6.80    6.90
   0  -5   1    3.80   10.60
   0  -5   1    5.30    5.60
   0  -5   1    4.40    3.80
  -1   5  -1   54.29    9.40
  -1   5  -1   47.90   10.90
  -1   5  -1   41.40    8.10
   1  -5   1   38.40    7.70
   1  -5   1   42.60    8.20
   1  -5   1   61.49   15.00
  -2   5  -1  549.25   48.30
  -2   5  -1  532.55   48.60
   2  -5   1  625.54   48.80
   2  -5   1  587.44   48.30
   2  -5   1  612.34   51.39
  -3   5  -1  112.49   14.80
  -3   5  -1   96.49   14.80
   3  -5   1  114.89   17.40
   3  -5   1  109.39   15.00
   3  -5   1   96.19   14.50
  -4   5  -1  309.17   25.50
   4  -5   1  200.58   24.20
   4  -5   1  233.28   24.70
   4  -5   1  219.28   27.50
  -5   5  -1    9.10    4.20
  -5   5  -1    5.10    6.90
   5  -5   1   13.10    9.70
   5  -5   1   13.10    6.90
  -6   5  -1   63.59    8.20
  -6   5  -1   60.09   11.50
   6  -5   1   75.39   11.10
   6  -5   1   54.09   12.50
   7   4  -1    7.10    2.90
   6   4  -1  116.29   11.50
   6   4  -1  108.19   12.80
  -6  -4   1   90.29   10.60
   5   4  -1    8.50    5.70
   5   4  -1    5.70    4.70
   4   4  -1  409.16   35.50
   4   4  -1  409.26   36.90
   3   4  -1   82.49   11.00
   3   4  -1   85.09    9.80
   3   4  -1   96.29   12.40
   2   4  -1 2425.16  187.48
   2   4  -1 2390.06  187.88
   2   4  -1 2159.78  188.28
   2   4  -1 2476.85  187.88
   1   4  -1  885.11   69.19
   1   4  -1  735.93   69.89
   1   4  -1  824.72   69.09
   1   4  -1  893.01   68.79
  -1  -4   1  946.91   69.29
  -1  -4   1  863.81   70.69
  -1  -4   1  864.31   68.69
   0   4  -1  805.62   63.09
   0   4  -1  705.83   63.59
   0   4  -1  755.22   63.59
   0  -4   1  827.82   63.49
   0  -4   1  743.63   62.89
   0  -4   1  796.12   64.79
   0  -4   1  867.01   65.89
  -1   4  -1  975.20   71.19
  -1   4  -1  919.31   71.49
  -1   4  -1  881.71   70.69
  -1   4  -1  924.01   79.09
   1  -4   1  873.71   72.99
   1  -4   1  786.42   73.09
   1  -4   1  909.91   71.49
   1  -4   1  781.62   70.89
  -2   4  -1 2625.04  186.98
  -2   4  -1 2457.85  186.98
  -2   4  -1 2322.47  192.48
   2  -4   1 2224.48  186.78
   2  -4   1 2328.77  186.98
   2  -4   1 2101.69  187.98
  -3   4  -1   80.89   12.30
  -3   4  -1  112.89   13.40
   3  -4   1   83.09   13.00
   3  -4   1   90.99   15.30
   3  -4   1   89.99   13.00
  -4   4  -1  417.36   37.30
  -4   4  -1  494.55   37.50
   4  -4   1  396.36   36.70
   4  -4   1  357.96   38.80
   4  -4   1  404.16   36.70
   4  -4   1  401.16   37.40
  -5   4  -1   12.50    7.80
  -5   4  -1    5.70    8.10
  -5   4  -1   14.50    4.70
   5  -4   1    9.10    6.70
   5  -4   1    6.90    9.20
  -6   4  -1  111.09   15.20
  -6   4  -1  115.49   11.70
   6  -4   1   88.49   16.20
   6  -4   1  127.09   13.30
  -7   4  -1   10.50    5.30
  -7   4  -1    4.20    3.20
   7  -4   1    5.00    5.20
   7  -4   1    2.60    5.10
   7   3  -1   15.90    3.80
   7   3  -1   21.90    5.00
  -7  -3   1   13.90    3.60
   6   3  -1   56.59   10.70
   6   3  -1   35.10   10.50
   6   3  -1   40.30    8.40
  -6  -3   1   49.90    8.40
  -6  -3   1   40.70    8.50
   5   3  -1   11.40    4.80
   5   3  -1    9.80    5.90
   5   3  -1    9.80    7.80
  -5  -3   1   15.60    4.60
   4   3  -1   83.59   12.00
   4   3  -1   82.19   11.10
   4   3  -1  107.29   13.90
  -4  -3   1   65.89   13.80
   3   3  -1  576.44   48.70
   3   3  -1  567.84   47.20
   3   3  -1  598.64   48.10
   2   3  -1 1169.98   89.79
   2   3  -1 1082.19   89.49
   2   3  -1 1154.88   89.29
   2   3  -1 1074.89   90.09
  -2  -3   1 1112.69   91.99
   1   3  -1   95.79    9.00
   1   3  -1   75.49    8.60
   1   3  -1   78.89    8.30
  -1  -3   1   76.89   11.60
  -1  -3   1   74.69    7.80
   0   3  -1   92.89    9.60
   0   3  -1   93.59   23.80
   0   3  -1   72.39   11.10
   0   3  -1   93.89    9.80
   0  -3   1   98.09   10.40
   0  -3   1  106.09    9.50
   0  -3   1  107.19   13.00
  -1   3  -1   69.59   11.00
  -1   3  -1   78.49    9.30
  -1   3  -1   88.79   23.00
   1  -3   1   91.79   14.60
   1  -3   1  114.79   13.40
   1  -3   1   96.59   10.70
   1  -3   1  105.59   10.10
  -2   3  -1 1018.00   83.89
  -2   3  -1  937.31   83.29
  -2   3  -1 1134.09   84.09
  -2   3  -1 1117.59   89.29
   2  -3   1 1019.20   84.89
   2  -3   1 1078.79   83.99
   2  -3   1  921.91   83.19
   2  -3   1 1121.39   83.99
  -3   3  -1  504.45   47.70
  -3   3  -1  566.24   48.40
  -3   3  -1  671.23   49.10
   3  -3   1  556.14   48.30
   3  -3   1  611.34   48.90
   3  -3   1  587.94   49.80
  -4   3  -1   84.99   13.30
  -4   3  -1   87.79   14.90
  -4   3  -1   66.59   13.70
   4  -3   1   84.89   12.50
   4  -3   1   86.09   16.40
   4  -3   1   72.69   11.30
   4  -3   1   92.69   14.00
  -5   3  -1   10.80    7.50
  -5   3  -1   13.60    4.10
  -5   3  -1   11.80    8.80
  -5   3  -1   14.60    4.50
   5  -3   1   17.30    6.30
   5  -3   1   15.80    8.90
   5  -3   1   13.90    4.80
  -6   3  -1   46.80   12.70
  -6   3  -1   49.00    7.80
   6  -3   1   59.29   14.00
   6  -3   1   52.69    9.80
   6  -3   1   40.00    9.80
  -7   3  -1   20.90    4.00
  -7   3  -1   24.20    6.90
  -7   3  -1   12.70    6.10
   7  -3   1   16.40    6.10
   7  -3   1   13.30    6.50
   7   2  -1  112.99   11.80
   7   2  -1  113.99   11.90
   7   2  -1   89.19   10.60
  -7  -2   1  119.59   11.10
  -7  -2   1  108.29   11.10
   6   2  -1   11.00    4.60
   6   2  -1   11.30    6.70
   6   2  -1   14.20    6.00
  -6  -2   1   11.10    5.30
  -6  -2   1   14.40    5.10
   5   2  -1   43.50    8.80
   5   2  -1   49.80    9.50
   5   2  -1   42.90    8.50
   5   2  -1   58.89   12.40
  -5  -2   1   42.40    7.70
  -5  -2   1   27.40    9.80
  -5  -2   1   41.40    8.80
   4   2  -1  156.88   16.20
   4   2  -1  124.29   15.20
   4   2  -1  153.28   13.70
  -4  -2   1  121.29   11.70
  -4  -2   1  103.69   16.50
   3   2  -1  312.57   27.60
   3   2  -1  342.47   27.50
   3   2  -1  320.47   26.40
  -3  -2   1  269.97   28.20
   2   2  -1 1749.12  143.89
   2   2  -1 1978.40  144.49
   2   2  -1 1769.12  144.59
   2   2  -1 1683.73  143.79
  -2  -2   1 1893.31  146.89
   1   2  -1 7591.64  679.13
   1   2  -1 9090.59  679.03
   1   2  -1 8467.15  678.83
   1   2  -1 8599.04  678.93
  -1  -2   1 9234.88  680.33
   0  -2   1  562.54   46.20
  -1   2  -1 9999.00  712.53
  -1   2  -1 8320.47  709.73
   1  -2   1 8773.52  711.03
   1  -2   1 8836.72  709.73
   1  -2   1 8985.10  709.73
  -2   2  -1 1862.81  142.19
  -2   2  -1 1870.21  145.09
   2  -2   1 1857.41  142.09
   2  -2   1 1573.94  141.49
   2  -2   1 1748.03  141.89
  -3   2  -1  320.87   27.40
  -3   2  -1  250.97   26.20
  -3   2  -1  273.27   26.60
   3  -2   1  301.27   27.90
   3  -2   1  320.37   25.90
   3  -2   1  331.87   27.00
  -4   2  -1  110.29   15.70
  -4   2  -1  133.29   15.70
  -4   2  -1  128.99   11.90
  -4   2  -1  113.09   15.20
   4  -2   1   94.79   16.40
   4  -2   1  131.29   14.30
   4  -2   1  130.99   15.70
  -5   2  -1   41.00    7.20
  -5   2  -1   38.70    7.20
  -5   2  -1   42.30    8.60
  -5   2  -1   33.20    9.20
  -5   2  -1   40.00   10.70
   5  -2   1   32.80   10.70
   5  -2   1   28.20    9.80
   5  -2   1   46.20   10.90
  -6   2  -1   12.50    4.20
  -6   2  -1   17.30    8.20
  -6   2  -1   13.80    4.10
   6  -2   1    7.40    8.00
   6  -2   1   10.10    6.40
   6  -2   1   10.80    8.20
   6  -2   1   19.60    5.30
  -7   2  -1  114.69   13.80
  -7   2  -1   99.39   12.70
  -7   2  -1  123.89   10.60
   7  -2   1   87.49   12.20
   7  -2   1  104.49   13.90
   7  -2   1  152.28   13.50
   7   1  -1   20.40    6.00
   7   1  -1   20.10    3.80
   7   1  -1   23.20    5.60
  -7  -1   1   13.80    7.00
  -7  -1   1   12.60    4.40
  -7  -1   1   18.80    4.20
   6   1  -1   75.29   13.60
   6   1  -1   68.09   12.00
   6   1  -1   71.19    9.60
  -6  -1   1   72.49   10.50
  -6  -1   1   79.29   10.00
   5   1  -1  175.08   20.00
  -5  -1   1  131.19   18.30
  -5  -1   1  186.28   16.30
  -5  -1   1  192.48   16.30
  -5  -1   1  159.18   20.60
   4   1  -1  148.69   14.10
   4   1  -1  131.49   15.70
   4   1  -1  127.29   15.80
  -4  -1   1  127.39   16.50
  -4  -1   1  126.39   12.20
   3   1  -1  367.46   30.80
   3   1  -1  385.16   32.00
   3   1  -1  401.46   31.80
   3   1  -1  359.66   30.80
  -3  -1   1  351.86   32.40
  -3  -1   1  336.87   31.90
   2   1  -1  549.95   44.50
   2   1  -1  540.05   44.40
   2   1  -1  526.25   43.90
   2   1  -1  511.95   43.80
  -2  -1   1  589.44   45.00
  -2  -1   1  539.15   44.00
  -1  -1   1 1087.99   85.59
  -1  -1   1 1017.40   85.39
   0   1  -1  180.88   17.60
   0  -1   1  234.68   17.90
  -1   1  -1 1034.80   81.99
   1  -1   1  995.20   83.09
   1  -1   1 1032.60   82.29
  -2   1  -1  553.24   45.00
  -2   1  -1  609.74   45.10
   2  -1   1  528.85   45.10
   2  -1   1  537.05   44.60
   2  -1   1  543.75   44.40
   2  -1   1  515.75   46.50
   2  -1   1  525.45   44.40
   2  -1   1  543.55   44.20
  -3   1  -1  359.66   32.40
  -3   1  -1  385.36   33.10
  -3   1  -1  351.06   32.70
   3  -1   1  365.56   31.20
   3  -1   1  391.06   32.10
   3  -1   1  385.46   32.90
   3  -1   1  394.86   32.30
   3  -1   1  358.66   31.30
  -4   1  -1  122.69   16.10
  -4   1  -1  126.09   12.60
  -4   1  -1  123.49   16.70
   4  -1   1  145.29   15.80
   4  -1   1  138.09   15.00
   4  -1   1  133.29   17.70
  -5   1  -1  175.48   20.50
  -5   1  -1  182.08   22.00
  -5   1  -1  193.88   16.60
  -5   1  -1  141.69   18.40
  -5   1  -1  195.48   16.60
   5  -1   1  153.18   22.30
  -6   1  -1   60.99    9.00
  -6   1  -1   64.09    9.10
  -6   1  -1   75.69    9.60
  -6   1  -1   74.09    8.30
   6  -1   1   82.29   12.70
   6  -1   1   68.19   12.30
   6  -1   1   76.79   13.00
  -7   1  -1   21.50    3.80
  -7   1  -1   16.00    7.10
  -7   1  -1   15.10    3.40
   7  -1   1   15.20    6.70
   7  -1   1   11.60    5.70
   7  -1   1   15.80    5.30
   7   0  -1    9.80    5.70
   7   0  -1    5.70    6.00
  -7   0   1    3.60    6.80
  -7   0   1    0.60    3.40
  -7   0   1    1.30    3.60
   6   0  -1    2.70    3.70
   6   0  -1    2.40    7.60
   6   0  -1    5.80    5.70
   6   0  -1   -0.10    5.10
   6   0  -1    0.00    7.40
  -6   0   1    0.10    4.50
  -6   0   1    3.00    4.30
  -6   0   1    2.20    3.90
   5   0  -1   55.59   13.40
  -5   0   1   54.29    8.50
  -5   0   1   49.20    9.70
  -5   0   1   52.79   13.00
  -5   0   1   49.50    8.30
   4   0  -1  115.29   13.40
   4   0  -1  115.99   15.40
   4   0  -1  126.49   13.20
  -4   0   1  122.99   15.50
  -4   0   1  128.99   16.20
  -4   0   1  120.29   11.80
   3   0  -1  184.28   16.60
   3   0  -1  158.08   15.10
   3   0  -1  153.78   16.20
   3   0  -1  159.68   15.60
   3   0  -1  165.18   16.90
  -3   0   1  158.68   17.10
  -3   0   1  162.18   17.50
   2   0  -1  729.33   56.09
   2   0  -1  707.23   56.09
   2   0  -1  680.53   56.79
   2   0  -1  663.63   55.69
   2   0  -1  751.32   56.69
   2   0  -1  663.63   55.69
  -2   0   1  675.33   56.59
  -2   0   1  681.83   56.09
  -1   0   1  609.44   50.09
   0   0  -1    1.40    1.50
   0   0   1    1.10    1.40
  -1   0  -1  752.42   61.59
  -1   0  -1  721.43   61.79
   1   0   1  808.82   62.09
  -2   0  -1  724.33   56.29
   2   0   1  679.43   55.69
   2   0   1  655.43   55.39
   2   0   1  709.63   58.39
   2   0   1  729.53   56.29
   2   0   1  617.54   55.29
   2   0   1  726.53   55.99
   2   0   1  695.13   55.79
  -3   0  -1  139.79   17.10
  -3   0  -1  169.78   17.60
  -3   0  -1  154.18   17.40
   3   0   1  152.28   14.60
   3   0   1  147.19   14.20
   3   0   1  164.28   15.70
   3   0   1  159.48   16.60
   3   0   1  163.78   15.70
  -4   0  -1  125.19   11.70
  -4   0  -1  108.79   15.40
  -4   0  -1  112.39   15.90
   4   0   1  127.09   14.80
   4   0   1  118.29   15.10
   4   0   1  135.69   16.20
  -5   0  -1   51.09    8.30
  -5   0  -1   45.80   11.00
  -5   0  -1   49.50   10.80
  -5   0  -1   65.89    8.50
   5   0   1   59.49   11.80
  -6   0  -1   -0.50    4.00
  -6   0  -1    3.20    4.00
  -6   0  -1    6.90    4.40
   6   0   1   -2.00    6.70
   6   0   1   -1.80    7.00
   6   0   1    3.30    3.50
   6   0   1    5.10    5.80
  -7   0  -1   -3.30    6.20
  -7   0  -1    4.40    3.30
  -7   0  -1   -0.10    3.50
   7   0   1   -4.90    5.10
   7   0   1    3.70    4.30
   7   0   1   -3.30    5.90
   7  -1  -1   29.10    6.50
   7  -1  -1   32.00    7.30
  -7   1   1   24.00    7.90
  -7   1   1   28.20    5.20
  -7   1   1   17.60    4.00
   6  -1  -1   87.89   13.20
   6  -1  -1   99.69   13.60
   6  -1  -1   80.99   13.60
   6  -1  -1  103.89   15.90
  -6   1   1  101.09   10.50
  -6   1   1   86.99   11.10
  -6   1   1   98.09   11.20
  -6   1   1  107.69   11.00
   5  -1  -1  136.09   23.60
  -5   1   1  195.38   17.30
  -5   1   1  196.38   17.30
  -5   1   1  191.18   19.50
  -5   1   1  173.38   20.90
   4  -1  -1  194.18   18.80
   4  -1  -1  171.58   20.60
   4  -1  -1  201.28   18.60
   4  -1  -1  179.08   19.60
  -4   1   1  206.88   20.60
  -4   1   1  207.38   17.10
  -4   1   1  154.38   18.60
  -4   1   1  202.98   19.80
   3  -1  -1  323.77   27.90
   3  -1  -1  337.17   28.60
   3  -1  -1  331.17   28.10
   3  -1  -1  310.37   29.10
  -3   1   1  325.57   28.60
  -3   1   1  323.77   29.20
  -3   1   1  336.07   28.90
   2  -1  -1  533.65   43.90
   2  -1  -1  553.24   44.00
   2  -1  -1  570.94   43.40
   2  -1  -1  598.84   43.70
  -2   1   1  457.45   43.80
  -2   1   1  486.65   43.40
  -1   1   1    2.40    5.00
   0  -1  -1  226.28   21.00
   0  -1  -1  275.37   20.60
   0   1   1  245.58   21.30
   0   1   1  237.18   20.40
  -1  -1  -1  883.41   75.59
   1   1   1  980.10   76.19
  -2  -1  -1  487.25   45.80
   2   1   1  605.64   46.00
   2   1   1  584.84   45.40
   2   1   1  576.74   45.10
   2   1   1  535.55   45.00
   2   1   1  557.24   45.90
   2   1   1  568.84   45.00
   2   1   1  560.74   48.60
  -3  -1  -1  313.87   29.10
  -3  -1  -1  322.87   28.60
   3   1   1  325.57   28.10
   3   1   1  317.57   28.40
   3   1   1  314.47   26.90
   3   1   1  328.27   27.60
  -4  -1  -1  201.78   21.10
  -4  -1  -1  215.88   17.30
  -4  -1  -1  198.68   21.60
   4   1   1  199.38   20.40
   4   1   1  171.68   20.50
  -5  -1  -1  211.18   18.20
  -5  -1  -1  231.08   18.20
  -5  -1  -1  176.88   22.60
   5   1   1  152.48   21.60
  -6  -1  -1  107.29   11.90
  -6  -1  -1  105.69   11.70
   6   1   1  103.09   11.30
   6   1   1  110.29   13.50
   6   1   1   91.99   14.90
   6   1   1  101.59   13.40
  -7  -1  -1   25.60    6.50
  -7  -1  -1   30.80    8.90
  -7  -1  -1   22.50    4.50
   7   1   1   29.50    6.60
   7   1   1   34.20    5.70
   7   1   1   39.00    9.10
   7   1   1   30.00    6.00
   7  -2  -1  112.39   14.20
   7  -2  -1  112.89   12.10
   7  -2  -1  128.19   14.60
  -7   2   1  109.49   14.30
  -7   2   1  103.79   10.50
   6  -2  -1   22.30    9.10
   6  -2  -1   10.10    6.80
   6  -2  -1   30.30    8.60
   6  -2  -1   29.60    6.40
   6  -2  -1   28.40    5.70
  -6   2   1   18.80    4.50
  -6   2   1   17.70    4.80
   5  -2  -1   31.90    8.20
   5  -2  -1   35.60   11.20
   5  -2  -1   57.89   10.80
  -5   2   1   62.29   12.10
  -5   2   1   49.99    8.30
  -5   2   1   47.30    8.10
   4  -2  -1  143.39   15.70
   4  -2  -1  129.79   18.00
   4  -2  -1  150.38   16.50
   4  -2  -1  142.69   16.90
  -4   2   1  152.48   13.80
  -4   2   1  151.08   17.10
  -4   2   1  144.59   15.70
  -4   2   1  160.38   17.10
   3  -2  -1  304.57   26.50
   3  -2  -1  289.77   26.70
   3  -2  -1  266.87   27.40
   3  -2  -1  303.07   26.30
  -3   2   1  305.97   26.80
  -3   2   1  277.67   25.70
  -3   2   1  326.17   26.50
  -3   2   1  320.97   26.90
   2  -2  -1 2238.08  172.78
   2  -2  -1 2209.38  172.48
   2  -2  -1 2178.28  173.08
   2  -2  -1 2309.17  172.48
  -2   2   1 2042.50  172.28
  -2   2   1 2037.40  172.18
   1  -2  -1 9126.29  662.93
   1  -2  -1 8613.24  662.03
   1  -2  -1 8483.45  662.13
  -1   2   1 7797.12  661.83
  -1   2   1 8190.28  662.73
  -1   2   1 8069.39  661.93
   0  -2  -1  645.14   54.69
   0  -2  -1  729.23   54.29
   0   2   1  664.43   55.09
   0   2   1  641.14   54.19
  -1  -2  -1 8195.58  690.33
   1   2   1 8828.72  689.53
   1   2   1 8594.44  689.83
   1   2   1 9302.27  691.23
  -2  -2  -1 1978.60  174.88
   2   2   1 2224.28  174.58
   2   2   1 2090.09  171.28
   2   2   1 2200.58  171.08
   2   2   1 2230.58  171.58
   2   2   1 2235.08  172.08
  -3  -2  -1  288.47   27.00
  -3  -2  -1  303.17   27.40
   3   2   1  298.47   26.60
   3   2   1  288.77   25.00
   3   2   1  311.57   26.40
  -4  -2  -1  134.49   18.10
  -4  -2  -1  128.09   18.00
  -4  -2  -1  162.48   13.10
   4   2   1  165.58   17.20
   4   2   1  133.99   16.40
  -5  -2  -1   47.90    7.70
  -5  -2  -1   56.69   14.00
   5   2   1   48.90   11.90
   5   2   1   57.69   12.10
   5   2   1   42.30    7.50
   5   2   1   42.80    7.40
   5   2   1   43.30   13.20
  -6  -2  -1   28.20    5.50
  -6  -2  -1   19.70    5.40
   6   2   1   27.10    7.50
   6   2   1   26.80    5.20
   6   2   1   28.50    6.30
   6   2   1   29.70    6.60
  -7  -2  -1   90.19   11.20
  -7  -2  -1   97.09   11.30
   7   2   1  133.59   12.10
   7   2   1  130.99   12.30
   7   2   1  132.89   10.90
   7  -3  -1    5.00    5.60
   7  -3  -1    2.80    6.70
  -7   3   1   10.30    6.20
  -7   3   1    6.90    3.60
   6  -3  -1   50.39   11.20
   6  -3  -1   45.60   10.30
   6  -3  -1   85.29   15.70
   6  -3  -1   59.19   10.10
  -6   3   1   63.69    8.70
  -6   3   1   66.19    8.10
  -6   3   1   66.29   13.80
   5  -3  -1   40.50    7.40
   5  -3  -1   22.20    5.70
   5  -3  -1   32.50    9.70
  -5   3   1   23.80    8.70
  -5   3   1   22.10    5.50
  -5   3   1   40.10    7.10
   4  -3  -1   68.39   12.40
   4  -3  -1   61.69   11.30
   4  -3  -1   60.19   12.10
   4  -3  -1   61.39   14.60
  -4   3   1   75.39   11.20
  -4   3   1   68.79   12.60
   3  -3  -1  612.04   51.59
   3  -3  -1  596.24   51.59
   3  -3  -1  582.24   52.29
  -3   3   1  652.93   51.29
  -3   3   1  669.13   51.59
  -3   3   1  598.64   51.09
   2  -3  -1 1061.49   81.29
   2  -3  -1  999.00   81.09
   2  -3  -1 1008.90   82.49
  -2   3   1 1080.59   80.99
  -2   3   1  932.51   80.79
  -2   3   1  956.20   80.59
   1  -3  -1  213.58   19.70
   1  -3  -1  186.88   19.90
   1  -3  -1  157.78   15.90
   1  -3  -1  190.08   17.10
  -1   3   1  177.68   17.40
  -1   3   1  183.58   15.80
  -1   3   1  186.18   15.80
   0  -3  -1  100.69   13.10
   0  -3  -1   62.69   11.30
   0  -3  -1   73.59    8.90
   0   3   1   86.29    8.80
   0   3   1   70.29    8.20
   0   3   1   76.29    8.20
   0   3   1   68.59   10.90
   0   3   1   64.79    8.40
  -1  -3  -1  187.18   14.70
  -1  -3  -1  178.48   15.00
  -1  -3  -1  156.78   17.90
   1   3   1  169.38   14.80
   1   3   1  165.18   15.80
   1   3   1  165.28   15.00
   1   3   1  179.18   15.70
   1   3   1  169.38   19.60
  -2  -3  -1  994.50   83.29
   2   3   1  999.20   81.19
   2   3   1 1052.89   82.09
   2   3   1 1001.90   81.19
   2   3   1 1029.50   80.79
   2   3   1  995.80   85.19
  -3  -3  -1  586.34   50.49
   3   3   1  646.84   50.49
   3   3   1  580.64   49.00
   3   3   1  582.64   49.20
  -4  -3  -1   54.89   13.70
  -4  -3  -1   37.50   13.60
   4   3   1   72.59   10.90
   4   3   1   71.99   12.70
  -5  -3  -1   34.30    6.90
   5   3   1   37.10    8.80
   5   3   1   29.10    5.70
   5   3   1   35.90    7.60
   5   3   1   37.50    7.00
  -6  -3  -1   57.79    9.00
  -6  -3  -1   58.59    8.80
   6   3   1   58.79    9.20
   6   3   1   90.99   12.00
   6   3   1   66.69   10.90
   6   3   1   76.19   10.20
  -7  -3  -1    5.50    3.20
   7   3   1   14.60    4.40
   7   3   1   12.40    3.20
   7  -4  -1   -0.20    5.60
   7  -4  -1    7.70    6.10
  -7   4   1    6.00    3.20
  -7   4   1    8.70    5.10
   6  -4  -1   74.49   11.70
   6  -4  -1   60.99   15.20
  -6   4   1   88.39    9.80
  -6   4   1   98.79   13.90
   5  -4  -1   21.60    7.10
   5  -4  -1   24.10   10.00
  -5   4   1   17.50    8.10
  -5   4   1   13.10    8.00
  -5   4   1   19.60    5.30
   4  -4  -1  420.46   37.80
   4  -4  -1  424.86   38.20
   4  -4  -1  412.36   39.00
   4  -4  -1  435.26   38.00
  -4   4   1  438.36   37.80
   3  -4  -1  146.69   16.70
   3  -4  -1  156.08   17.00
   3  -4  -1  143.89   18.00
  -3   4   1  140.29   16.60
  -3   4   1  171.48   16.90
   2  -4  -1 2290.67  187.98
   2  -4  -1 2279.17  186.18
  -2   4   1 2395.06  186.38
  -2   4   1 2527.05  186.18
  -2   4   1 2191.08  186.68
   1  -4  -1  964.30   74.19
   1  -4  -1  967.50   72.09
   1  -4  -1  786.22   71.19
  -1   4   1  872.31   71.89
  -1   4   1  841.62   71.19
  -1   4   1  920.51   71.69
   0  -4  -1  842.72   68.59
   0  -4  -1  880.41   70.79
   0   4   1  745.63   68.39
   0   4   1  883.31   68.49
   0   4   1  882.71   69.39
   0   4   1  887.21   68.89
  -1  -4  -1  867.11   75.29
  -1  -4  -1  896.01   77.29
   1   4   1  999.20   74.99
   1   4   1  916.41   75.79
   1   4   1 1009.90   76.49
   1   4   1 1070.99   81.09
   1   4   1  993.20   75.59
   1   4   1  810.82   75.09
  -2  -4  -1 2342.17  189.08
   2   4   1 2399.56  188.58
   2   4   1 2336.17  187.08
   2   4   1 2312.37  187.38
   2   4   1 2414.66  187.78
  -3  -4  -1  143.39   18.20
   3   4   1  176.68   17.70
   3   4   1  145.49   15.00
   3   4   1  157.68   15.70
  -4  -4  -1  343.47   36.90
   4   4   1  477.25   37.90
  -5  -4  -1    8.90    3.90
   5   4   1   14.90    5.70
   5   4   1   16.40    5.10
   5   4   1   14.20    5.20
   5   4   1   14.20    5.80
  -6  -4  -1   74.39    8.90
   6   4   1   88.49   11.80
   6   4   1  109.49   12.10
   6   4   1   69.29   13.20
   6   4   1   92.79   10.10
   7   4   1    8.10    2.60
   6  -5  -1   29.10   10.50
   6  -5  -1   62.89   10.60
  -6   5   1   69.39    7.90
  -6   5   1   60.79   10.80
   5  -5  -1   13.40    7.20
   5  -5  -1   17.40   10.10
  -5   5   1    9.50    7.30
  -5   5   1   11.70    7.90
  -5   5   1   15.80    4.90
   4  -5  -1  253.57   24.40
   4  -5  -1  242.38   23.70
   4  -5  -1  216.88   23.50
  -4   5   1  202.58   23.10
   3  -5  -1   91.59   13.80
   3  -5  -1  122.09   15.30
   3  -5  -1   83.59   15.90
  -3   5   1  112.89   14.80
  -3   5   1  134.09   15.70
   2  -5  -1  417.26   37.80
   2  -5  -1  432.66   40.80
   2  -5  -1  392.96   37.10
  -2   5   1  475.55   38.30
  -2   5   1  481.05   37.70
   1  -5  -1   29.50   12.30
   1  -5  -1   26.30    7.20
   1  -5  -1   33.40   13.40
  -1   5   1   30.10    5.90
  -1   5   1   30.10    7.60
  -1   5   1   32.40    6.50
   0  -5  -1    7.90    5.30
   0  -5  -1    3.20   11.00
   0   5   1    1.50    5.70
   0   5   1    7.90    5.10
  -1  -5  -1   27.40    6.10
  -1  -5  -1   34.70   11.70
   1   5   1   27.90    6.30
   1   5   1   28.80    5.00
   1   5   1   35.20    8.50
   1   5   1   24.30    6.20
  -2  -5  -1  504.15   46.70
  -2  -5  -1  489.75   40.80
   2   5   1  403.46   38.60
   2   5   1  455.55   38.10
   2   5   1  426.76   37.00
   3   5   1  106.39   15.00
   3   5   1  112.49   13.50
   4   5   1  250.27   25.90
   5   5   1    7.20    5.20
   5   5   1   13.70    4.60
   6   5   1   54.49    7.30
   6  -6  -1   19.40    6.40
   6  -6  -1   28.90    7.90
  -6   6   1   46.20   11.00
  -6   6   1   25.20    4.50
   5  -6  -1   30.00    8.30
   5  -6  -1   29.50   10.80
  -5   6   1   48.40    7.00
   4  -6  -1  260.37   27.10
   4  -6  -1  214.18   21.00
   4  -6  -1  214.68   33.20
  -4   6   1  205.68   22.90
  -4   6   1  213.68   20.30
  -4   6   1  178.18   18.40
  -4   6   1  202.28   20.80
   3  -6  -1   60.09   13.20
  -3   6   1   61.69   14.60
  -3   6   1   59.19   12.80
   2  -6  -1  261.27   31.80
   2  -6  -1  289.37   28.10
  -2   6   1  328.47   28.20
  -2   6   1  330.97   29.40
   1  -6  -1   78.49    9.50
   1  -6  -1   69.69   16.80
   1  -6  -1   63.59   12.20
   1  -6  -1   97.59   24.20
  -1   6   1   88.99   15.10
  -1   6   1   81.39   13.00
  -1   6   1  100.39   11.40
   0  -6  -1  211.18   29.50
   0  -6  -1  277.87   22.10
   0  -6  -1  271.67   24.50
   0   6   1  297.87   25.50
   0   6   1  252.07   24.10
  -1  -6  -1   95.99   19.30
  -1  -6  -1   77.39    6.90
   1   6   1   96.19   15.30
   1   6   1   66.09   11.60
  -2  -6  -1  292.07   31.50
  -2  -6  -1  330.87   40.70
   2   6   1  289.07   27.20
   3   6   1   74.79   11.90
   4   6   1  248.88   22.80
   5   6   1   43.40   10.00
   6   6   1   21.70    4.70
   6  -7  -1   84.69    9.90
   5  -7  -1   99.59   13.20
  -5   7   1   95.89   13.40
   4  -7  -1   51.09   11.10
   4  -7  -1   26.00   12.80
  -4   7   1   31.70    7.80
  -4   7   1   35.60    8.60
   3  -7  -1  307.37   23.80
   3  -7  -1  239.98   30.60
  -3   7   1  217.88   30.00
  -3   7   1  237.88   23.50
  -3   7   1  240.68   23.70
  -3   7   1  227.98   26.30
   2  -7  -1  104.99   22.60
   2  -7  -1  104.79   15.40
  -2   7   1  112.29   18.80
  -2   7   1  137.69   17.70
   1  -7  -1   89.29   10.70
   1  -7  -1   77.59   10.50
   1  -7  -1   91.59   29.90
   1  -7  -1   76.79   13.40
   1  -7  -1   99.69   22.00
  -1   7   1  117.89   15.10
   0  -7  -1    0.80    6.90
   0  -7  -1    6.50    3.10
   0  -7  -1   15.90   18.40
   0  -7  -1    8.00    3.70
   0  -7  -1    7.40   14.10
   0   7   1    7.30    7.90
   0   7   1   17.90    6.90
  -1  -7  -1  117.49   24.10
  -1  -7  -1  129.29   34.80
  -1  -7  -1  118.49   10.30
   1   7   1   83.29   14.20
  -2  -7  -1  174.88   39.90
   2   7   1  100.89   15.30
   3   7   1  311.87   31.70
   3   7   1  294.97   27.70
   4   7   1   63.39   13.80
   5  -8  -1    2.00    5.60
  -5   8   1   11.50    6.00
  -5   8   1   13.40    6.00
   4  -8  -1    7.40   11.40
   4  -8  -1   10.80    6.30
  -4   8   1   19.70    7.70
  -4   8   1    9.60    7.40
   3  -8  -1  134.29   24.80
   3  -8  -1  159.08   17.00
  -3   8   1  162.48   20.30
  -3   8   1  163.58   17.70
   2  -8  -1   56.19   10.90
   2  -8  -1   28.70    7.00
  -2   8   1   45.70   13.90
  -2   8   1   27.30   10.30
  -2   8   1   20.30    7.70
  -2   8   1   22.50    8.00
  -2   8   1   63.19   10.80
   1  -8  -1  250.87   33.20
   1  -8  -1  214.48   25.60
   1  -8  -1  239.18   24.10
   1  -8  -1  277.17   23.50
   1  -8  -1  258.17   25.40
   1  -8  -1  273.97   24.60
   1  -8  -1  327.17   46.50
  -1   8   1  274.87   25.50
  -1   8   1  303.07   25.60
  -1   8   1  316.57   29.50
  -1   8   1  279.87   29.30
   0  -8  -1   77.19   21.70
   0  -8  -1   65.19    9.10
   0  -8  -1  145.79   38.50
   0   8   1  120.69   18.70
   0   8   1   65.89   12.70
  -1  -8  -1  218.78   34.00
  -1  -8  -1  259.77   23.60
  -1  -8  -1  296.67   52.49
   1   8   1  380.36   32.60
   1   8   1  330.07   33.10
   1   8   1  300.57   28.20
   1   8   1  322.37   28.10
   1   8   1  217.08   25.90
   1   8   1  276.07   29.90
  -2  -8  -1   30.10    5.90
   2   8   1   27.20   13.60
   2   8   1   18.60    8.90
   2   8   1   25.00    9.10
   2   8   1   30.20    8.80
   3   8   1  138.59   21.10
   3   8   1  167.38   16.80
   3   8   1  107.49   20.10
  -5   9   1   11.00    5.60
   4  -9  -1   20.40    5.90
   4  -9  -1   13.90   10.00
  -4   9   1   53.59   10.50
  -4   9   1   20.70    6.60
   3  -9  -1   20.40   13.10
   3  -9  -1   31.70    7.80
  -3   9   1   36.50    9.00
  -3   9   1   31.50    8.10
   2  -9  -1  134.69   23.90
   2  -9  -1  113.69   14.90
   2  -9  -1  110.49   15.10
  -2   9   1  146.39   22.30
  -2   9   1  129.89   15.30
  -2   9   1  130.09   16.70
  -2   9   1  138.99   15.70
   1  -9  -1   28.40    7.20
   1  -9  -1   31.70    7.20
  -1   9   1   19.80    8.90
  -1   9   1   39.40    8.50
  -1   9   1   16.80    8.40
  -1   9   1   28.60   12.60
  -1   9   1   20.90    8.70
  -1   9   1   39.20   11.90
  -1   9   1   21.40   13.20
   0  -9  -1  247.58   19.20
   0  -9  -1  177.48   18.90
   0  -9  -1  212.68   19.50
   0   9   1  191.28   23.80
   0   9   1  201.38   23.10
   0   9   1  171.58   26.50
   0   9   1  227.38   21.20
   0   9   1  197.98   28.20
   0   9   1  185.78   24.20
   0   9   1  184.48   22.30
  -1  -9  -1   17.80    4.60
  -1  -9  -1   17.50    5.80
   1   9   1   25.00    9.50
   1   9   1   33.10   10.10
   1   9   1   30.90    8.50
   1   9   1   23.60    9.20
   1   9   1   14.90   13.20
  -2  -9  -1  125.99   12.70
   2   9   1  122.59   16.80
   2   9   1  107.59   16.80
   2   9   1  108.49   15.70
   2   9   1   97.09   19.10
   2   9   1  116.59   26.60
   3   9   1   48.50   11.80
   3   9   1   27.10    8.90
   3   9   1   27.30   13.60
   4   9   1   12.50    6.60
   4 -10  -1    8.70    5.20
  -4  10   1   33.80    6.70
  -4  10   1   25.70    6.00
   3 -10  -1  112.39   12.20
   3 -10  -1   93.99   17.70
  -3  10   1  100.49   12.40
  -3  10   1   89.39   13.10
  -3  10   1   90.19   11.20
   2 -10  -1   94.89   20.50
   2 -10  -1  103.29   13.10
  -2  10   1  104.59   12.20
  -2  10   1  121.09   15.20
  -2  10   1  111.09   14.10
  -2  10   1  105.79   19.60
  -2  10   1   89.89   13.20
   1 -10  -1   50.79    9.90
  -1  10   1   15.90    8.80
  -1  10   1   87.49   14.00
  -1  10   1   53.79   12.20
  -1  10   1   25.80   13.30
  -1  10   1   99.49   18.10
  -1  10   1   42.10    9.10
   0 -10  -1   41.70    9.30
   0 -10  -1   11.00    7.40
   0 -10  -1   65.49   10.30
   0  10   1   22.60    8.80
   0  10   1   19.60   10.10
   0  10   1   32.70    8.70
   0  10   1   29.50   12.00
   0  10   1   45.40   14.10
   0  10   1   29.30   12.90
  -1 -10  -1   14.70    6.20
   1  10   1   35.20   10.60
   1  10   1   17.00   13.00
   1  10   1   47.80   14.50
   1  10   1   31.50    8.40
   1  10   1   21.00    8.70
  -2 -10  -1  131.59   12.10
   2  10   1   76.69   15.10
   2  10   1  129.79   22.40
   2  10   1   94.69   16.70
   3  10   1   90.89   19.90
   3  10   1  103.19   14.90
  -3  11   1    7.10    8.30
   2 -11  -1    7.90    6.80
   2 -11  -1   15.90    5.10
  -2  11   1    4.00    6.60
  -2  11   1   12.80    4.80
  -2  11   1    4.70    4.80
   1 -11  -1   28.30    8.20
   1 -11  -1   42.00    6.90
   1 -11  -1   26.70    6.90
  -1  11   1   33.60    8.40
  -1  11   1   35.40    7.00
  -1  11   1   27.80   10.30
  -1  11   1   31.70   10.70
   0 -11  -1   12.40    6.40
   0 -11  -1    0.20    5.60
   0 -11  -1   45.10   10.80
   0  11   1   18.90    8.10
   0  11   1   28.60    9.70
   0  11   1   25.30    6.80
   0  11   1   19.70   11.20
  -1 -11  -1   49.80   10.30
  -1 -11  -1   52.29    9.00
   1  11   1   41.00    9.80
   1  11   1   29.80    7.50
   1  11   1   35.30   11.80
   1  11   1   49.20   12.10
   2  11   1   22.00   10.60
   2  11  -2   25.40   10.40
   2  11  -2   13.40    7.10
   1  11  -2   24.50    6.90
   1  11  -2   13.00    8.30
   1  11  -2   18.40    7.60
   1  11  -2   18.40    7.90
   1  11  -2   20.60   10.80
  -1 -11   2   29.60    7.00
  -1 -11   2   45.00   10.00
   0  11  -2   42.20    9.50
   0  11  -2   11.90    9.10
   0  11  -2   37.80    7.10
   0  11  -2   56.89   11.90
   0  11  -2   58.79    9.50
   0 -11   2   37.30    7.50
   0 -11   2   62.19   12.20
  -1  11  -2   21.70    8.50
  -1  11  -2   34.50    6.30
  -1  11  -2   17.50    6.20
   1 -11   2   35.10    7.60
   1 -11   2   12.10    5.70
  -2  11  -2   19.40    5.20
  -2  11  -2   20.50    7.40
   2 -11   2   24.10    5.70
   2 -11   2    3.30    4.70
   3  10  -2   19.90    7.40
   3  10  -2   27.70   12.00
   2  10  -2   89.99   16.80
   2  10  -2   69.89   15.20
   2  10  -2   66.49   12.90
   1  10  -2  127.49   25.40
   1  10  -2  122.09   16.80
   1  10  -2  134.39   20.20
   1  10  -2  104.99   19.40
   1  10  -2  143.09   17.00
  -1 -10   2  158.78   15.50
  -1 -10   2  141.19   16.10
   0  10  -2   12.70    7.50
   0  10  -2   -3.60   10.20
   0  10  -2   19.50    8.20
   0  10  -2    2.30    8.10
   0  10  -2   23.50   13.70
   0 -10   2    3.10    6.00
   0 -10   2   -8.40    7.20
   0 -10   2    7.10    6.20
  -1  10  -2  146.29   17.00
  -1  10  -2  140.19   16.70
  -1  10  -2  127.89   21.90
  -1  10  -2  126.39   19.50
   1 -10   2  158.18   14.80
   1 -10   2  160.48   18.20
   1 -10   2  116.59   16.40
   1 -10   2  136.59   21.50
  -2  10  -2   88.79   12.80
  -2  10  -2   59.89   11.50
  -2  10  -2   50.59    9.80
   2 -10   2   88.19   11.20
   2 -10   2   86.09   17.90
  -3  10  -2   33.60    8.50
  -3  10  -2   63.49   10.00
   3 -10   2   32.40    7.10
   3 -10   2   17.90    8.90
  -4  10  -2   80.89   10.00
  -4  10  -2   85.19    9.40
   4 -10   2   77.19   12.80
   4 -10   2   74.49   11.40
   3   9  -2   25.30    8.50
   3   9  -2   43.40   13.90
   2   9  -2  138.09   26.40
   2   9  -2   99.49   15.80
   2   9  -2  114.09   19.70
   2   9  -2  105.69   16.30
  -2  -9   2  136.29   13.30
   1   9  -2   83.69   15.50
   1   9  -2   86.39   18.20
   1   9  -2   85.99   17.50
   1   9  -2   85.49   15.60
   1   9  -2   59.39   15.60
   1   9  -2   74.39   13.90
  -1  -9   2   66.09   10.30
  -1  -9   2   54.49   10.80
   0   9  -2  107.69   15.50
   0   9  -2   97.19   15.40
   0   9  -2   89.69   17.30
   0   9  -2   93.69   18.10
   0   9  -2  113.39   18.10
   0   9  -2   97.19   17.40
   0  -9   2  141.99   15.30
   0  -9   2   93.79   13.20
   0  -9   2   61.59   13.10
  -1   9  -2   72.29   15.40
  -1   9  -2   71.19   14.10
  -1   9  -2   78.69   13.40
  -1   9  -2   60.49   13.90
   1  -9   2   46.10    9.40
   1  -9   2   64.19   10.90
   1  -9   2   71.69   15.10
   1  -9   2   45.00   11.30
   1  -9   2   83.79   12.30
  -2   9  -2  136.69   15.70
  -2   9  -2  108.49   15.70
  -2   9  -2  109.49   21.00
  -2   9  -2  133.59   14.90
  -2   9  -2  137.19   17.50
   2  -9   2   90.79   14.10
   2  -9   2  104.19   15.20
   2  -9   2  106.49   23.70
  -3   9  -2   51.19    8.90
  -3   9  -2   40.00    9.90
   3  -9   2   44.60   14.60
   3  -9   2   58.59   11.00
  -4   9  -2  101.59   13.70
  -4   9  -2  118.29   13.10
   4  -9   2  110.29   12.70
   4  -9   2  103.39   17.70
   3   8  -2  339.47   33.70
   3   8  -2  331.57   37.30
   2   8  -2  107.19   19.90
   2   8  -2  110.29   17.20
   2   8  -2   99.89   15.10
   2   8  -2  125.99   24.60
   2   8  -2  104.29   15.70
  -2  -8   2  109.49   11.20
   1   8  -2  343.57   35.60
   1   8  -2  272.67   34.70
   1   8  -2  399.06   33.90
   1   8  -2  299.67   31.80
   1   8  -2  340.97   30.40
   1   8  -2  338.27   30.80
   1   8  -2  340.67   29.50
  -1  -8   2  271.27   29.50
  -1  -8   2  315.07   27.20
  -1  -8   2  240.88   41.50
   0   8  -2  433.56   37.20
   0  -8   2  450.35   35.50
   0  -8   2  419.36   37.90
   0  -8   2  413.76   35.30
   0  -8   2  378.56   44.30
  -1   8  -2  325.37   31.90
  -1   8  -2  257.87   29.40
  -1   8  -2  288.67   33.30
  -1   8  -2  352.66   29.30
  -1   8  -2  277.07   32.50
  -1   8  -2  302.17   29.70
  -1   8  -2  316.07   29.30
   1  -8   2  350.46   27.90
   1  -8   2  269.57   39.20
   1  -8   2  314.77   28.50
   1  -8   2  338.67   28.60
   1  -8   2  404.96   54.19
   1  -8   2  338.07   28.60
   1  -8   2  341.07   35.80
  -2   8  -2  107.29   18.00
  -2   8  -2  112.29   16.20
  -2   8  -2   91.09   21.80
  -2   8  -2  104.79   13.90
   2  -8   2   90.89   22.70
   2  -8   2  119.69   14.30
   2  -8   2   84.99   13.50
  -3   8  -2  310.77   27.00
  -3   8  -2  269.37   30.70
  -3   8  -2  277.57   27.70
   3  -8   2  291.57   26.50
   3  -8   2  309.07   33.50
  -4   8  -2   33.80    9.20
  -4   8  -2   38.10    8.50
   4  -8   2   45.10   13.40
   4  -8   2   54.29    9.60
  -5   8  -2   50.49    9.80
   5  -8   2   64.29   10.20
   5  -8   2   78.89   15.10
   3   7  -2  250.57   29.30
   3   7  -2  180.08   24.20
   2   7  -2  166.88   18.30
   2   7  -2  182.98   17.00
  -2  -7   2  148.49   24.60
   1   7  -2  122.09   15.00
  -1  -7   2  125.29   22.90
  -1  -7   2  124.49   11.40
  -1  -7   2  111.69   14.90
   0   7  -2   10.90   10.60
   0   7  -2    5.30    6.50
   0  -7   2    9.30    3.60
   0  -7   2    6.90    7.50
   0  -7   2   15.50   14.80
   0  -7   2    7.80    4.10
  -1   7  -2  120.29   14.80
  -1   7  -2  109.29   18.50
  -1   7  -2  120.29   16.40
   1  -7   2  132.19   16.30
   1  -7   2  119.69   13.60
   1  -7   2  109.19   23.00
   1  -7   2  139.89   13.60
  -2   7  -2  172.18   21.10
  -2   7  -2  158.18   19.90
   2  -7   2  155.88   18.90
  -3   7  -2  169.28   19.80
  -3   7  -2  216.48   20.10
  -3   7  -2  216.08   21.90
   3  -7   2  179.08   26.90
   3  -7   2  168.58   19.10
  -4   7  -2   90.89   13.60
  -4   7  -2   85.89   18.10
   4  -7   2   92.89   15.70
   4  -7   2   81.89   11.70
  -5   7  -2   69.09    9.90
  -5   7  -2   36.50    8.00
   5  -7   2   38.20    8.10
   5  -7   2   41.10   12.40
   6  -7   2   40.70    8.80
   6  -7   2   58.99    8.30
   6   6  -2    6.10    3.40
   5   6  -2  188.58   17.30
   3   6  -2   65.79   15.50
   3   6  -2   85.29   10.30
   3   6  -2   71.29   13.60
   2   6  -2  321.57   30.90
   2   6  -2  380.16   30.20
   2   6  -2  335.57   31.10
  -2  -6   2  371.76   36.50
  -2  -6   2  364.56   31.20
   1   6  -2   65.39    9.60
   1   6  -2   53.59   10.90
  -1  -6   2   73.29    6.80
  -1  -6   2   83.19   19.10
  -1  -6   2   84.89   11.70
   0   6  -2 1319.67  104.29
   0   6  -2 1284.87  105.19
   0   6  -2 1352.76  104.89
   0  -6   2 1301.07  107.69
   0  -6   2 1253.17  103.09
   0  -6   2 1274.87  104.69
  -1   6  -2   82.29   10.90
  -1   6  -2   95.49   12.20
  -1   6  -2   77.69   13.90
   1  -6   2   72.19    9.50
   1  -6   2   67.09   18.20
   1  -6   2   86.39   12.50
   1  -6   2   57.59   10.30
  -2   6  -2  361.46   31.40
  -2   6  -2  361.96   30.50
   2  -6   2  294.67   35.00
   2  -6   2  346.57   30.70
   2  -6   2  302.97   29.80
  -3   6  -2   95.99   15.00
  -3   6  -2   78.99   15.30
   3  -6   2   90.19   14.50
  -4   6  -2  153.18   18.20
  -4   6  -2  150.18   15.30
  -4   6  -2  110.09   16.20
   4  -6   2  120.59   17.50
   4  -6   2   95.89   15.40
   4  -6   2  103.59   21.30
  -5   6  -2  238.88   20.70
  -5   6  -2  175.08   17.80
   5  -6   2  201.08   20.30
   5  -6   2  215.78   26.30
  -6   6  -2    6.00    3.50
  -6   6  -2   16.20    6.20
   6  -6   2    5.00    5.80
   6   5  -2  160.28   14.80
   5   5  -2  123.89   13.10
   4   5  -2   58.29   11.20
   3   5  -2   36.00    6.90
   3   5  -2   22.80    5.20
   2   5  -2   92.89   11.00
   2   5  -2  113.99   12.20
   2   5  -2  122.49   12.30
  -2  -5   2   80.29   11.90
   1   5  -2   61.19    8.10
   1   5  -2   67.99    9.70
   1   5  -2   56.69    9.40
  -1  -5   2   57.99   10.00
  -1  -5   2   52.89    7.60
   0   5  -2  384.56   34.40
   0   5  -2  400.46   34.90
   0   5  -2  396.96   33.70
   0  -5   2  408.96   34.30
   0  -5   2  455.45   38.30
   0  -5   2  388.76   33.50
  -1   5  -2   53.89    8.90
  -1   5  -2   59.39   11.50
  -1   5  -2   58.49   10.00
   1  -5   2   57.79   10.30
   1  -5   2   58.49   13.00
   1  -5   2   52.89    8.70
  -2   5  -2   77.99   12.20
  -2   5  -2   74.19   13.00
   2  -5   2  116.49   18.00
   2  -5   2  102.99   13.10
   2  -5   2   97.69   11.80
  -3   5  -2   42.00    9.10
  -3   5  -2   41.40    8.50
   3  -5   2   13.10    7.80
   3  -5   2   25.00    8.40
  -4   5  -2   89.29   15.80
  -4   5  -2   87.09   15.70
   4  -5   2   78.89   13.70
   4  -5   2   79.99   14.40
   4  -5   2   58.09   13.90
  -5   5  -2   92.59   20.30
  -5   5  -2  156.08   16.60
  -5   5  -2  142.49   12.70
   5  -5   2  111.79   20.90
   5  -5   2  102.09   15.40
  -6   5  -2  164.28   14.70
  -6   5  -2  172.68   17.50
   6  -5   2  153.98   16.40
   7   4  -2   38.60    5.60
   6   4  -2   55.69   10.00
   6   4  -2   49.00    7.90
  -6  -4   2   48.80    7.80
   5   4  -2  456.45   39.70
   5   4  -2  507.15   41.60
   4   4  -2  135.19   14.80
   4   4  -2  131.79   16.10
   4   4  -2  127.89   13.10
  -4  -4   2   86.29   14.20
   3   4  -2  361.96   32.10
   3   4  -2  371.86   32.90
   3   4  -2  389.46   31.40
   2   4  -2  634.14   47.40
   2   4  -2  571.24   47.10
   2   4  -2  524.35   47.50
   2   4  -2  625.24   46.80
  -2  -4   2  527.05   46.50
   1   4  -2  927.61   67.39
   1   4  -2  927.51   67.19
  -1  -4   2  743.63   68.89
  -1  -4   2  759.72   66.79
  -1  -4   2  812.82   67.39
   0   4  -2   37.20    7.60
   0   4  -2   43.30    9.60
   0   4  -2   48.00    7.20
   0  -4   2   51.79    8.60
   0  -4   2   45.40   11.20
   0  -4   2   37.10    6.60
  -1   4  -2  817.32   67.69
  -1   4  -2  824.02   68.09
  -1   4  -2  810.22   75.49
  -1   4  -2  781.12   67.19
   1  -4   2  885.31   67.69
   1  -4   2  901.51   69.59
   1  -4   2  850.41   70.39
  -2   4  -2  551.24   56.79
  -2   4  -2  619.34   47.80
  -2   4  -2  589.34   48.60
  -2   4  -2  608.94   48.80
   2  -4   2  558.44   48.40
   2  -4   2  561.64   53.09
   2  -4   2  598.14   48.80
  -3   4  -2  346.57   32.20
  -3   4  -2  357.46   32.50
   3  -4   2  360.56   32.60
   3  -4   2  387.36   32.40
  -4   4  -2  109.09   15.30
  -4   4  -2   94.89   16.50
   4  -4   2   98.39   19.30
   4  -4   2  128.59   16.50
   4  -4   2  124.69   14.70
   4  -4   2  106.39   14.50
  -5   4  -2  459.85   39.30
  -5   4  -2  382.76   40.00
  -5   4  -2  484.25   36.40
   5  -4   2  358.96   44.30
   5  -4   2  508.15   38.00
   5  -4   2  389.56   39.10
  -6   4  -2   48.80   11.80
  -6   4  -2   37.30    7.60
   6  -4   2   47.30   10.00
   6  -4   2   61.89   10.10
   6  -4   2   42.70    9.90
  -7   4  -2   49.00    8.40
  -7   4  -2   44.40    5.80
   7  -4   2   25.00    6.20
   7   3  -2   10.60    3.60
   7   3  -2    8.60    4.40
  -7  -3   2    3.10    3.00
   6   3  -2   13.90    4.80
   6   3  -2   15.00    6.30
  -6  -3   2   18.50    5.30
  -6  -3   2   17.90    4.90
   5   3  -2  426.66   36.10
   5   3  -2  403.36   35.40
   5   3  -2  455.45   37.80
   5   3  -2  382.86   37.90
  -5  -3   2  440.36   35.00
   4   3  -2   41.50    7.90
   4   3  -2   36.20    6.30
   4   3  -2   43.30    9.20
  -4  -3   2   30.70    7.70
  -4  -3   2   27.20    8.30
   3   3  -2  110.99   13.30
   3   3  -2  123.19   14.20
   3   3  -2  134.89   12.70
  -3  -3   2  139.69   15.30
   2   3  -2  695.83   51.79
   2   3  -2  616.04   51.29
   2   3  -2  601.04   51.79
   2   3  -2  695.23   51.29
  -2  -3   2  547.25   53.89
   1   3  -2 1877.21  158.98
   1   3  -2 2276.27  159.28
   1   3  -2 2116.39  158.88
   1   3  -2 1735.53  158.98
  -1  -3   2 2162.78  158.98
  -1  -3   2 1768.02  158.68
  -1  -3   2 2107.59  160.88
   0   3  -2 2530.05  199.28
   0   3  -2 2535.75  194.48
   0   3  -2 2332.07  194.58
   0   3  -2 2178.48  194.68
   0  -3   2 2544.25  196.18
   0  -3   2 2602.64  194.68
   0  -3   2 2476.95  194.78
  -1   3  -2 2028.30  159.08
  -1   3  -2 1986.50  159.48
  -1   3  -2 2097.89  164.18
   1  -3   2 2048.70  160.38
   1  -3   2 2038.30  159.48
   1  -3   2 2095.59  159.48
   1  -3   2 2000.00  161.48
   1  -3   2 1761.22  158.88
  -2   3  -2  554.54   52.59
  -2   3  -2  536.85   46.50
  -2   3  -2  468.25   46.20
  -2   3  -2  552.54   45.30
   2  -3   2  611.84   46.50
   2  -3   2  637.64   46.50
   2  -3   2  588.94   50.49
   2  -3   2  557.34   45.60
  -3   3  -2  161.18   15.40
   3  -3   2  101.89   16.50
   3  -3   2  108.29   13.00
   3  -3   2  116.29   14.50
   3  -3   2  116.09   13.60
  -4   3  -2   33.90    9.10
  -4   3  -2   18.20    7.50
   4  -3   2   32.40    9.10
   4  -3   2   34.40   10.10
  -5   3  -2  401.46   40.40
  -5   3  -2  474.25   36.20
  -5   3  -2  402.06   38.70
  -5   3  -2  475.25   36.10
   5  -3   2  410.26   38.80
   5  -3   2  432.46   37.20
  -6   3  -2   25.80    8.50
  -6   3  -2   13.50    4.70
   6  -3   2   13.00    8.70
   6  -3   2   26.30    8.80
   6  -3   2   20.30    6.20
  -7   3  -2    9.40    5.00
  -7   3  -2   10.30    6.00
  -7   3  -2    4.40    3.50
   7  -3   2   12.20    5.60
   7  -3   2    3.50    5.60
   7   2  -2   15.00    5.20
   7   2  -2   14.70    3.80
   7   2  -2    9.40    9.20
  -7  -2   2   15.40    3.80
  -7  -2   2   12.40    4.10
   6   2  -2   80.29   10.20
   6   2  -2   75.09   13.50
   6   2  -2   66.19   12.70
   6   2  -2   78.49   12.30
  -6  -2   2   74.79   10.60
  -6  -2   2   77.79   10.50
   5   2  -2   69.49   13.90
   5   2  -2   68.09   11.10
   5   2  -2   70.39    9.60
   5   2  -2   54.49   13.80
  -5  -2   2   78.89   14.00
  -5  -2   2   68.99    9.40
  -5  -2   2   62.49   12.60
   4   2  -2  298.27   27.30
   4   2  -2  291.27   26.00
   4   2  -2  317.97   28.20
  -4  -2   2  304.27   28.70
  -4  -2   2  271.07   26.90
  -4  -2   2  302.17   24.50
   3   2  -2  722.63   59.29
   3   2  -2  733.43   58.99
   3   2  -2  702.13   58.19
   2   2  -2 1894.91  161.28
   2   2  -2 2063.39  161.48
   2   2  -2 2175.08  161.98
   2   2  -2 1974.60  161.98
  -2  -2   2 2070.29  164.38
   1   2  -2  627.84   48.80
   1   2  -2  595.54   48.70
   1   2  -2  654.63   49.10
  -1  -2   2  557.04   48.80
   0   2  -2  148.39   12.00
   0   2  -2  124.99   20.80
   0   2  -2  106.29   10.70
   0   2  -2  110.09   13.00
   0   2  -2  106.69   10.90
   0  -2   2  136.79   14.10
   0  -2   2  130.99   11.50
   0  -2   2  135.59   11.20
  -1   2  -2  656.03   51.99
  -1   2  -2  699.03   56.39
   1  -2   2  647.24   54.09
   1  -2   2  628.54   51.79
   1  -2   2  617.24   51.69
   1  -2   2  609.04   51.39
  -2   2  -2 1760.22  154.48
  -2   2  -2 2108.99  154.78
  -2   2  -2 1913.21  157.68
   2  -2   2 1846.32  157.18
   2  -2   2 1891.61  154.08
   2  -2   2 2003.50  154.28
   2  -2   2 1907.01  155.38
   2  -2   2 2077.59  154.58
  -3   2  -2  669.63   54.99
  -3   2  -2  642.44   54.89
  -3   2  -2  576.54   54.49
   3  -2   2  720.73   55.09
   3  -2   2  638.94   54.09
   3  -2   2  670.83   54.09
   3  -2   2  723.83   55.99
  -4   2  -2  335.57   29.60
  -4   2  -2  311.17   28.50
  -4   2  -2  299.97   25.50
  -4   2  -2  290.27   28.40
   4  -2   2  306.17   28.70
   4  -2   2  297.47   29.80
  -5   2  -2   69.59    9.00
  -5   2  -2   72.49    8.80
  -5   2  -2   84.99   17.60
  -5   2  -2   67.49   13.10
  -5   2  -2   84.69    8.90
   5  -2   2   62.19   14.10
   5  -2   2   59.29   13.90
   5  -2   2   71.69   13.20
   5  -2   2   58.39   12.50
  -6   2  -2   70.59    8.60
  -6   2  -2   71.69    8.80
  -6   2  -2   61.69   13.40
   6  -2   2   76.99   13.80
   6  -2   2   76.89   10.10
   6  -2   2   86.59   12.90
   6  -2   2   56.39   12.70
  -7   2  -2   14.60    6.10
  -7   2  -2   23.40    5.10
   7  -2   2   10.90    5.70
   7   1  -2   30.90    6.10
   7   1  -2   36.90    6.50
   7   1  -2   39.80    6.90
  -7  -1   2   30.30    7.30
  -7  -1   2   25.60    6.70
   6   1  -2   14.70    5.80
   6   1  -2   16.10    7.50
   6   1  -2   11.00    4.40
   6   1  -2   12.50    6.00
  -6  -1   2   22.10    5.80
  -6  -1   2   14.60    5.10
   5   1  -2   18.40    7.50
   5   1  -2    1.80    6.50
  -5  -1   2    6.80    4.50
  -5  -1   2    3.00    7.30
  -5  -1   2    3.70    6.20
  -5  -1   2   -0.30    4.20
   4   1  -2  125.79   14.70
   4   1  -2  136.39   13.20
  -4  -1   2   97.39   15.60
  -4  -1   2  103.39   13.70
  -4  -1   2  112.69   11.20
   3   1  -2  208.58   19.40
   3   1  -2  213.08   19.50
   3   1  -2  227.18   20.70
   3   1  -2  238.88   20.60
  -3  -1   2  196.38   21.20
   2   1  -2  268.87   24.00
   2   1  -2  318.97   24.90
   2   1  -2  275.27   24.20
   2   1  -2  264.97   25.50
   2   1  -2  286.57   24.50
  -2  -1   2  292.97   25.30
  -2  -1   2  309.77   28.70
   1   1  -2 1063.89   86.89
   1   1  -2 1051.59   86.89
  -1  -1   2 1152.18   88.49
   0  -1   2 1515.45  121.19
  -1   1  -2 1018.70   87.29
   1  -1   2 1107.29   87.89
   1  -1   2 1089.79   88.69
   1  -1   2 1140.79   87.29
  -2   1  -2  295.87   24.90
  -2   1  -2  292.87   29.20
  -2   1  -2  266.07   24.20
   2  -1   2  277.37   23.70
   2  -1   2  273.37   26.30
   2  -1   2  274.87   23.20
   2  -1   2  269.77   23.60
   2  -1   2  262.77   23.30
  -3   1  -2  204.18   20.30
  -3   1  -2  202.08   20.10
  -3   1  -2  214.68   20.30
   3  -1   2  206.48   18.20
   3  -1   2  167.48   21.90
   3  -1   2  217.58   20.30
   3  -1   2  186.78   17.80
   3  -1   2  199.18   19.00
   3  -1   2  220.38   19.60
   3  -1   2  202.18   19.00
  -4   1  -2  120.79   11.10
  -4   1  -2  102.79   15.60
  -4   1  -2  117.79   16.00
  -4   1  -2   94.09   15.30
   4  -1   2  114.39   14.40
   4  -1   2  117.79   16.90
  -5   1  -2    4.50    4.00
  -5   1  -2    8.30    9.30
  -5   1  -2    5.30    7.40
  -5   1  -2    1.80    3.90
   5  -1   2    6.60    7.30
   5  -1   2    9.10    8.70
  -6   1  -2   16.30    4.30
  -6   1  -2   23.00    8.20
  -6   1  -2   14.30    4.70
  -6   1  -2   21.90    4.40
   6  -1   2   21.70    7.80
   6  -1   2    8.90    7.70
   6  -1   2   10.00    5.90
  -7   1  -2   42.40    9.50
  -7   1  -2   29.80    6.40
  -7   1  -2   42.90    6.00
   7  -1   2   38.50    7.60
   7  -1   2   44.40    8.40
   7  -1   2   40.40    7.80
   7   0  -2   13.70    6.50
   7   0  -2   11.70    5.80
  -7   0   2    6.80    3.90
  -7   0   2   11.00    3.70
  -7   0   2   10.30    7.90
   6   0  -2   -4.70    5.00
   6   0  -2   -4.70    7.40
   6   0  -2   -1.10    5.90
  -6   0   2    4.20    4.80
  -6   0   2    3.10    4.50
  -6   0   2    0.30    4.20
   5   0  -2   33.70    9.30
   5   0  -2   20.50    6.90
  -5   0   2   32.30    7.50
  -5   0   2   24.00    5.60
  -5   0   2   28.70    9.20
  -5   0   2   30.60    8.10
   4   0  -2   39.60    9.10
   4   0  -2   43.40    8.50
   4   0  -2   33.00    8.00
  -4   0   2   38.50    6.70
  -4   0   2   45.70    9.90
  -4   0   2   44.90    9.20
   3   0  -2 1192.88   91.49
   3   0  -2 1136.39   90.89
   3   0  -2 1076.49   90.79
   3   0  -2 1134.69   91.69
  -3   0   2 1143.19   91.49
  -3   0   2 1110.39   91.79
   2   0  -2   68.19    8.10
   2   0  -2   71.49    8.30
   2   0  -2   59.89    9.70
   2   0  -2   63.79    8.90
   2   0  -2   50.59    7.90
   2   0  -2   63.69    9.90
  -2   0   2   51.89   10.20
   1   0  -2  829.52   63.69
  -1   0   2  778.32   63.59
  -1   0   2  758.72   64.19
   0   0  -2  148.89   13.40
   0   0   2  147.79   13.40
  -1   0  -2  709.63   60.39
   1   0   2  798.22   60.89
   1   0   2  719.93   60.99
  -2   0  -2   47.10    9.90
  -2   0  -2   43.60   17.80
   2   0   2   57.59    9.50
   2   0   2   55.59    7.60
   2   0   2   49.60    5.80
   2   0   2   55.09   12.80
   2   0   2   50.89    6.80
   2   0   2   63.49    8.30
   2   0   2   60.19    7.70
  -3   0  -2 1195.08   88.69
  -3   0  -2 1072.39   88.49
  -3   0  -2 1024.10   88.29
   3   0   2 1106.59   88.39
   3   0   2 1016.10   87.59
   3   0   2 1066.19   87.89
   3   0   2 1142.09   87.79
  -4   0  -2   39.20    9.20
  -4   0  -2   45.80    6.70
  -4   0  -2   38.20    9.10
  -4   0  -2   43.80    9.30
   4   0   2   41.70   10.50
   4   0   2   49.20    8.60
   4   0   2   40.20    9.20
  -5   0  -2   30.60    9.40
  -5   0  -2   42.10    7.30
  -5   0  -2   34.60   10.20
  -5   0  -2   39.20    7.20
   5   0   2   34.90   10.00
  -6   0  -2    6.20    4.00
  -6   0  -2    5.20    4.40
  -6   0  -2    6.00    3.90
   6   0   2   -1.30    5.20
   6   0   2    0.20    7.20
   6   0   2    0.50    6.90
   6   0   2    4.10    3.50
  -7   0  -2    8.00    6.20
  -7   0  -2   10.60    3.40
  -7   0  -2   10.60    3.80
   7   0   2   13.20    5.80
   7   0   2   14.00    4.80
   7   0   2   13.30    5.40
   7   0   2    9.60    3.50
   7  -1  -2   33.30    5.80
   7  -1  -2   27.60    6.80
   7  -1  -2   26.30    7.70
  -7   1   2   28.80    6.10
  -7   1   2   27.10    9.10
  -7   1   2   35.40    5.80
   6  -1  -2   25.10    8.90
   6  -1  -2   22.50    7.00
   6  -1  -2   19.10    6.00
  -6   1   2   15.90    4.90
  -6   1   2   13.40    4.60
  -6   1   2   10.20    4.60
  -6   1   2   10.40    4.40
   5  -1  -2    5.20    7.60
   5  -1  -2    1.90    6.20
  -5   1   2   10.20    6.90
  -5   1   2    4.30    4.40
  -5   1   2    8.60    4.70
  -5   1   2    2.00    7.30
   4  -1  -2   95.29   12.30
   4  -1  -2  104.29   12.90
   4  -1  -2   78.09   13.40
   4  -1  -2   77.99   14.80
  -4   1   2  110.59   12.90
  -4   1   2  130.09   14.70
  -4   1   2  104.89   10.80
  -4   1   2   94.49   19.40
   3  -1  -2  263.17   21.90
   3  -1  -2  259.07   22.30
   3  -1  -2  243.48   21.70
   3  -1  -2  235.98   22.80
  -3   1   2  243.28   22.70
  -3   1   2  228.88   22.00
  -3   1   2  225.78   21.70
   2  -1  -2  253.97   21.60
   2  -1  -2  240.98   20.10
   2  -1  -2  236.68   20.20
   2  -1  -2  265.87   20.50
   2  -1  -2  249.38   20.80
  -2   1   2  219.08   20.60
  -2   1   2  196.88   19.80
  -2   1   2  197.48   19.80
   1  -1  -2  857.01   65.59
  -1   1   2  775.82   65.39
   0  -1  -2 1458.15  106.99
   0  -1  -2 1286.17  107.39
   0   1   2 1264.77  107.29
  -1  -1  -2  778.42   70.59
  -1  -1  -2  824.22   70.39
   1   1   2  880.71   69.69
   1   1   2 1000.40   71.69
  -2  -1  -2  213.08   25.70
  -2  -1  -2  227.08   21.40
   2   1   2  217.78   19.60
   2   1   2  250.27   20.90
   2   1   2  234.98   21.00
   2   1   2  260.57   24.90
   2   1   2  257.77   20.30
   2   1   2  240.38   20.70
  -3  -1  -2  221.48   23.00
  -3  -1  -2  246.48   23.10
   3   1   2  250.37   22.20
   3   1   2  244.28   22.50
   3   1   2  236.88   21.30
  -4  -1  -2   85.89   15.00
  -4  -1  -2  115.69   10.10
  -4  -1  -2  100.89   17.80
  -4  -1  -2  109.79   15.30
   4   1   2   79.29   14.20
   4   1   2   89.49   13.40
  -5  -1  -2    6.20    4.20
  -5  -1  -2    5.70    8.30
  -5  -1  -2    5.50    4.00
  -5  -1  -2    1.70    8.00
   5   1   2   -2.90    7.90
   5   1   2   11.90    7.20
  -6  -1  -2   12.70    4.50
  -6  -1  -2   12.40    4.60
  -6  -1  -2   15.00    5.00
   6   1   2   15.80    4.30
   6   1   2   21.70    5.90
   6   1   2   38.60    8.00
   6   1   2   27.10    6.80
  -7  -1  -2   25.50    4.60
  -7  -1  -2   27.70    6.30
   7   1   2   34.20    6.50
   7   1   2   33.10    6.20
   7   1   2   33.60    5.30
   7   1   2   37.50    6.80
   7  -2  -2   25.20    7.60
   7  -2  -2   13.30    5.90
  -7   2   2   14.40    7.40
  -7   2   2   13.90    3.70
   6  -2  -2   76.89   13.10
   6  -2  -2   87.29   11.10
   6  -2  -2   93.19   15.90
   6  -2  -2   72.19   13.30
   6  -2  -2   78.09   12.10
  -6   2   2   76.09    9.40
  -6   2   2   65.99    9.70
   5  -2  -2   89.99   15.20
   5  -2  -2   56.79   12.60
   5  -2  -2   88.99   12.30
   5  -2  -2   77.79   11.80
   5  -2  -2   71.69   13.70
   5  -2  -2   65.99   13.20
   5  -2  -2   77.69   12.90
  -5   2   2   89.79   10.20
  -5   2   2   74.99   10.10
  -5   2   2   77.39   14.80
  -5   2   2   78.89    9.80
   4  -2  -2  362.06   29.90
   4  -2  -2  328.97   30.30
   4  -2  -2  333.27   29.50
   4  -2  -2  327.37   31.10
  -4   2   2  316.27   28.90
  -4   2   2  337.37   30.10
  -4   2   2  341.57   29.50
  -4   2   2  301.97   27.60
   3  -2  -2  731.23   60.49
   3  -2  -2  759.82   60.39
   3  -2  -2  700.53   60.99
   3  -2  -2  730.93   60.29
  -3   2   2  794.72   60.39
  -3   2   2  668.03   59.69
  -3   2   2  771.32   60.59
   2  -2  -2 2314.77  180.38
   2  -2  -2 2093.59  179.68
   2  -2  -2 2451.35  179.68
   2  -2  -2 2411.26  179.58
  -2   2   2 2338.87  179.48
  -2   2   2 1916.81  178.88
  -2   2   2 2287.37  179.18
   1  -2  -2  735.23   53.69
   1  -2  -2  594.34   53.69
   1  -2  -2  659.13   56.19
   1  -2  -2  711.33   54.99
  -1   2   2  632.34   53.29
  -1   2   2  656.53   53.49
   0  -2  -2  143.59   19.60
   0  -2  -2  158.88   17.00
   0   2   2  185.78   16.00
   0   2   2  165.78   14.50
  -1  -2  -2  596.54   53.99
  -1  -2  -2  581.54   56.09
   1   2   2  598.44   53.09
   1   2   2  703.53   53.19
   1   2   2  750.62   53.59
   1   2   2  753.52   55.99
  -2  -2  -2 2304.87  181.68
  -2  -2  -2 2056.49  184.78
  -2  -2  -2 2092.29  183.08
   2   2   2 2353.76  184.28
   2   2   2 2346.87  180.48
   2   2   2 2586.14  181.78
   2   2   2 2144.29  180.98
   2   2   2 2358.36  180.88
  -3  -2  -2  749.42   60.99
   3   2   2  698.33   60.09
   3   2   2  759.52   60.89
  -4  -2  -2  274.37   30.80
  -4  -2  -2  350.26   27.00
  -4  -2  -2  337.97   31.20
   4   2   2  336.77   30.40
   4   2   2  329.37   29.60
  -5  -2  -2   14.00   17.70
  -5  -2  -2   86.49    9.40
  -5  -2  -2   58.29   15.40
   5   2   2   88.99   11.10
   5   2   2  101.79   12.30
   5   2   2   76.99   13.40
   5   2   2   82.29   15.60
   5   2   2   79.19   10.30
   5   2   2   87.79   12.80
  -6  -2  -2   74.19    9.70
  -6  -2  -2   69.99    9.40
   6   2   2   71.29    9.50
   6   2   2   77.09   11.20
   6   2   2   80.89   11.10
   6   2   2   90.09   13.00
  -7  -2  -2   13.80    3.80
  -7  -2  -2    9.50    4.00
   7   2   2   14.50    4.30
   7   2   2   20.70    3.60
   7   2   2   23.90    5.20
   7  -3  -2   -0.20    6.80
  -7   3   2    9.00    6.10
  -7   3   2    4.20    3.50
   6  -3  -2    8.30    9.40
   6  -3  -2   14.30    5.90
   6  -3  -2   15.70    8.00
   6  -3  -2   20.40    5.70
   6  -3  -2    8.90    6.80
  -6   3   2    9.50    3.70
  -6   3   2   11.90    8.40
  -6   3   2   10.00    4.80
   5  -3  -2  368.66   33.40
   5  -3  -2  406.06   33.10
   5  -3  -2  386.56   34.90
   5  -3  -2  396.66   33.20
  -5   3   2  366.16   31.70
  -5   3   2  374.06   32.20
   4  -3  -2   22.60    7.30
   4  -3  -2   25.90    7.80
   4  -3  -2   29.80    8.40
   4  -3  -2   26.40    8.50
  -4   3   2   32.20    7.60
  -4   3   2   38.00    9.40
   3  -3  -2  156.68   15.80
   3  -3  -2  147.19   14.40
  -3   3   2  129.29   15.30
  -3   3   2  109.29   13.50
  -3   3   2  101.69   13.30
   2  -3  -2  665.63   56.29
   2  -3  -2  633.24   55.79
   2  -3  -2  626.44   57.59
  -2   3   2  688.73   55.69
  -2   3   2  738.13   55.59
  -2   3   2  746.23   55.89
   1  -3  -2 1747.83  139.09
   1  -3  -2 1593.74  138.69
   1  -3  -2 1808.82  140.59
   1  -3  -2 1678.03  141.99
  -1   3   2 1727.23  138.49
  -1   3   2 1903.21  138.69
  -1   3   2 1767.62  138.99
   0  -3  -2 2577.74  207.68
   0  -3  -2 2515.05  206.38
   0   3   2 2661.53  206.38
   0   3   2 2537.05  206.48
   0   3   2 2651.63  207.38
   0   3   2 2687.83  206.38
  -1  -3  -2 1782.92  139.59
  -1  -3  -2 1760.22  140.79
   1   3   2 1766.02  140.19
   1   3   2 1563.64  139.39
   1   3   2 1763.42  142.09
   1   3   2 1858.81  139.89
   1   3   2 1828.82  139.39
  -2  -3  -2  658.13   57.29
  -2  -3  -2  640.24   59.69
   2   3   2  717.63   54.09
   2   3   2  635.64   52.99
   2   3   2  616.14   56.99
   2   3   2  620.74   52.69
   2   3   2  675.23   52.39
  -3  -3  -2  106.09   16.80
   3   3   2  137.29   14.00
   3   3   2  160.38   15.90
   3   3   2  148.19   14.40
  -4  -3  -2   17.30    8.30
  -4  -3  -2   25.50    8.40
   4   3   2   37.70    9.10
   4   3   2   27.00    6.60
  -5  -3  -2  401.36   34.80
   5   3   2  416.36   36.00
   5   3   2  415.96   35.30
   5   3   2  429.46   36.40
   5   3   2  465.85   36.00
  -6  -3  -2   15.50    4.40
  -6  -3  -2   14.40    4.70
   6   3   2   19.20    4.70
   6   3   2   13.90    6.50
   6   3   2   23.40    6.00
   6   3   2   13.90    5.40
  -7  -3  -2    4.10    3.00
   7   3   2    7.10    4.00
   7   3   2    3.40    4.30
   7   3   2    0.10    2.70
   7  -4  -2   28.40    7.50
  -7   4   2   33.70    7.60
  -7   4   2   34.40    5.40
   6  -4  -2   73.09   16.00
   6  -4  -2   47.50    8.30
  -6   4   2   57.69   10.60
  -6   4   2   53.49    8.40
   5  -4  -2  448.76   38.60
   5  -4  -2  455.85   39.10
   5  -4  -2  485.15   41.20
  -5   4   2  429.36   40.30
  -5   4   2  448.06   38.00
  -5   4   2  500.95   43.80
   4  -4  -2  107.09   14.30
   4  -4  -2   90.29   13.80
   4  -4  -2   84.39   14.80
   4  -4  -2   69.49   14.90
  -4   4   2   88.49   12.10
  -4   4   2  108.19   14.50
   3  -4  -2  212.48   25.90
   3  -4  -2  248.98   25.70
   3  -4  -2  228.88   25.10
  -3   4   2  315.67   25.30
  -3   4   2  301.87   24.50
  -3   4   2  341.27   26.20
   2  -4  -2  480.35   44.50
   2  -4  -2  555.24   45.30
   2  -4  -2  524.55   47.60
  -2   4   2  546.75   45.10
  -2   4   2  594.44   44.80
  -2   4   2  536.15   44.10
   1  -4  -2  826.12   70.99
   1  -4  -2  844.22   75.69
   1  -4  -2  918.11   73.49
  -1   4   2  853.51   70.69
  -1   4   2  984.40   71.29
  -1   4   2  768.02   70.29
  -1   4   2  965.40   70.49
   0  -4  -2  103.19   11.00
   0  -4  -2   94.39   16.40
   0   4   2   97.49   10.30
   0   4   2   94.59   10.80
   0   4   2   88.59   11.60
   0   4   2  100.99   10.60
  -1  -4  -2  908.01   73.19
  -1  -4  -2  982.80   75.49
   1   4   2  888.31   72.89
   1   4   2  843.12   73.89
   1   4   2  825.82   76.09
   1   4   2  952.80   74.59
   1   4   2 1002.00   73.69
  -2  -4  -2  464.55   48.90
   2   4   2  561.34   44.10
   2   4   2  528.25   42.90
  -3  -4  -2  294.07   28.10
   3   4   2  272.77   26.50
   3   4   2  268.17   24.90
  -4  -4  -2  100.69   16.70
  -4  -4  -2  103.79   17.40
   4   4   2  110.39   16.20
  -5  -4  -2  420.46   38.60
   5   4   2  504.15   39.80
   5   4   2  511.55   39.90
   5   4   2  476.85   39.50
   5   4   2  484.05   40.20
  -6  -4  -2   47.40    7.00
   6   4   2   43.30   10.20
   6   4   2   56.89    9.30
   6   4   2   51.89    8.00
   7   4   2   35.00    4.70
   6  -5  -2  113.49   18.10
   6  -5  -2  162.28   15.70
  -6   5   2  147.39   13.60
  -6   5   2  146.39   15.90
   5  -5  -2  149.59   16.30
   5  -5  -2  168.68   19.90
  -5   5   2  110.79   13.00
  -5   5   2  121.29   16.20
   4  -5  -2   56.19   11.30
   4  -5  -2   58.19   14.20
   4  -5  -2   42.00    9.70
   3  -5  -2   36.90    8.50
  -3   5   2   30.50    8.00
  -3   5   2   16.90    6.60
   2  -5  -2  116.49   20.30
   2  -5  -2  104.49   14.80
  -2   5   2  143.99   16.40
  -2   5   2  156.78   14.80
   1  -5  -2   78.59   20.40
   1  -5  -2   71.19   17.20
   1  -5  -2   55.59   10.40
  -1   5   2   52.89   10.40
  -1   5   2   60.79    9.20
  -1   5   2   51.79   12.80
   0  -5  -2  533.15   47.00
   0  -5  -2  557.24   51.19
   0  -5  -2  511.45   43.20
   0   5   2  544.05   43.20
   0   5   2  461.35   43.30
   0   5   2  538.75   43.60
  -1  -5  -2   69.79   16.20
  -1  -5  -2   61.49   21.10
   1   5   2   71.39   10.60
   1   5   2   59.79   10.00
   1   5   2   86.29   14.20
  -2  -5  -2  139.99   25.20
   2   5   2  117.89   13.90
   2   5   2  114.39   14.90
  -3  -5  -2   15.90    9.00
   3   5   2   51.79   10.20
   3   5   2   36.90    9.20
   4   5   2   71.99   14.40
   5   5   2  151.98   15.60
   5   5   2  155.28   14.90
   6   5   2  161.78   15.50
   6   5   2  156.58   14.40
   6  -6  -2    1.70    5.50
   6  -6  -2    7.70    7.40
  -6   6   2    4.20    3.40
   5  -6  -2  177.98   19.10
   5  -6  -2  174.58   21.60
  -5   6   2  164.48   17.70
  -5   6   2  178.38   16.00
   4  -6  -2   96.39   16.10
   4  -6  -2   98.89   14.10
  -4   6   2   87.29   10.20
  -4   6   2   95.69   13.00
  -4   6   2   70.89   12.70
  -4   6   2   88.79   15.50
   3  -6  -2   96.99   15.10
  -3   6   2  117.19   15.40
  -3   6   2  101.69   17.00
   2  -6  -2  263.07   25.30
   2  -6  -2  237.48   30.20
  -2   6   2  296.27   26.90
  -2   6   2  257.47   25.30
   1  -6  -2   96.99   24.30
   1  -6  -2   99.39   12.50
   1  -6  -2   89.99    9.70
   1  -6  -2   74.09   19.90
  -1   6   2   77.99   15.60
   0  -6  -2 1232.88   99.29
   0  -6  -2 1301.57  109.79
   0  -6  -2 1245.18  104.49
   0  -6  -2 1226.08  100.89
   0   6   2 1231.58  101.39
   0   6   2 1270.77  100.69
  -1  -6  -2   69.39    6.60
  -1  -6  -2   67.19   18.30
  -1  -6  -2   72.69   25.70
   1   6   2   98.19   15.50
   1   6   2   92.49   12.00
  -2  -6  -2  299.97   40.60
   2   6   2  281.97   26.50
   3   6   2   99.29   13.50
   3   6   2   91.99   15.20
   4   6   2  120.79   14.10
   5   6   2  207.48   19.70
   6   6   2    8.50    2.90
   6  -7  -2   72.89    9.00
   5  -7  -2   45.60    8.80
   5  -7  -2   50.99   11.20
  -5   7   2   68.69   11.10
  -5   7   2   50.79   10.10
   4  -7  -2   79.29   12.90
  -4   7   2   98.79   14.20
  -4   7   2  110.29   13.40
   3  -7  -2  110.89   15.50
   3  -7  -2  128.99   24.80
  -3   7   2  144.19   19.00
  -3   7   2   98.89   23.70
  -3   7   2  139.19   16.10
  -3   7   2  170.08   15.80
   2  -7  -2  188.18   27.80
   2  -7  -2  204.98   21.40
  -2   7   2  208.88   22.70
  -2   7   2  197.58   24.00
   1  -7  -2  140.19   16.60
   1  -7  -2  143.79   14.20
   1  -7  -2  145.49   13.90
   1  -7  -2  147.89   32.00
   1  -7  -2  120.19   23.90
  -1   7   2  138.39   18.00
   0  -7  -2    4.40    3.60
   0  -7  -2    7.10    3.10
   0  -7  -2   17.70   15.30
   0  -7  -2    2.50    8.70
   0  -7  -2   17.50   18.80
   0   7   2    9.80    8.20
   0   7   2   13.20    6.70
  -1  -7  -2  166.08   13.70
  -1  -7  -2  147.49   25.40
  -1  -7  -2  171.98   38.00
   1   7   2  136.09   17.20
  -2  -7  -2  296.47   48.10
   2   7   2  203.08   22.80
   3   7   2  160.88   22.60
   3   7   2  157.78   17.40
   4   7   2  110.09   13.90
   5   7   2   60.59   10.00
   5  -8  -2   57.29    9.40
  -5   8   2   48.00    9.60
  -5   8   2   50.89    9.30
   4  -8  -2   48.90   12.60
   4  -8  -2   29.00    7.10
  -4   8   2   28.50    8.30
  -4   8   2   29.30    7.90
   3  -8  -2  250.97   24.30
   3  -8  -2  256.77   30.30
  -3   8   2  270.17   24.70
  -3   8   2  282.97   24.80
  -3   8   2  248.78   28.50
   2  -8  -2  122.39   14.20
   2  -8  -2  105.99   14.60
  -2   8   2  106.69   18.80
  -2   8   2  116.89   22.30
  -2   8   2  113.29   14.50
  -2   8   2  102.89   14.00
  -2   8   2  111.49   14.70
   1  -8  -2  356.46   28.80
   1  -8  -2  342.27   56.29
   1  -8  -2  308.17   28.30
   1  -8  -2  288.97   30.00
   1  -8  -2  328.07   27.70
   1  -8  -2  324.17   28.80
  -1   8   2  333.37   33.70
  -1   8   2  313.87   29.80
  -1   8   2  331.67   33.10
  -1   8   2  347.57   32.90
  -1   8   2  343.77   29.30
  -1   8   2  305.17   34.80
   0  -8  -2  429.36   34.90
   0  -8  -2  485.05   58.29
   0  -8  -2  362.06   44.30
   0  -8  -2  459.05   35.50
   0   8   2  393.76   39.90
   0   8   2  396.76   36.90
  -1  -8  -2  361.96   29.00
  -1  -8  -2  386.06   29.40
  -1  -8  -2  280.37   38.40
   1   8   2  310.97   32.60
   1   8   2  362.46   36.90
   1   8   2  379.16   32.40
   1   8   2  327.77   31.30
   1   8   2  390.96   35.40
   1   8   2  285.07   32.50
  -2  -8  -2  115.89   11.10
   2   8   2  113.39   17.40
   2   8   2  116.99   19.60
   2   8   2  126.49   25.50
   2   8   2  125.19   16.30
   3   8   2  304.37   30.60
   3   8   2  270.17   26.90
   3   8   2  295.07   39.70
   4   8   2   24.20    8.60
   4   8   2   47.00   10.20
   4  -9  -2  121.89   12.80
   4  -9  -2  121.29   17.70
  -4   9   2  125.79   13.60
  -4   9   2  114.09   14.40
   3  -9  -2   74.29   14.90
   3  -9  -2   53.19   11.90
  -3   9   2   50.19   10.10
  -3   9   2   63.89   12.30
   2  -9  -2  132.79   14.70
   2  -9  -2  118.39   22.80
   2  -9  -2  116.19   14.40
  -2   9   2  117.59   16.00
  -2   9   2  112.89   22.30
  -2   9   2  103.19   14.70
  -2   9   2  102.59   15.60
   1  -9  -2   84.79   12.70
   1  -9  -2   63.89   11.80
  -1   9   2   98.19   19.60
  -1   9   2  125.69   23.50
  -1   9   2   87.79   14.10
  -1   9   2   47.70   10.70
  -1   9   2   47.20   13.30
  -1   9   2   72.19   13.60
   0  -9  -2  102.89   11.90
   0  -9  -2   72.99   11.00
   0   9   2   75.59   18.20
   0   9   2   98.69   18.50
   0   9   2   74.79   15.90
   0   9   2  100.19   16.90
   0   9   2   92.79   15.50
   0   9   2   97.29   14.10
  -1  -9  -2   59.59    8.00
  -1  -9  -2   63.99   10.00
   1   9   2   62.49   17.10
   1   9   2   41.90    9.60
   1   9   2   67.29   15.90
   1   9   2   44.60   10.60
   1   9   2   59.39   14.70
  -2  -9  -2  129.79   13.30
   2   9   2  120.29   17.30
   2   9   2  119.99   17.40
   2   9   2  142.49   26.50
   2   9   2  119.09   19.60
  -3  -9  -2   72.49    9.10
   3   9   2   53.79   12.20
   3   9   2   58.59   15.20
   3   9   2   64.69   15.00
   4   9   2  116.79   16.00
  -4  10   2   74.19   11.30
  -4  10   2   78.29    8.90
  -4  10   2   68.99    9.50
   3 -10  -2   26.00    6.40
   3 -10  -2   21.70   10.70
  -3  10   2   19.70    6.10
  -3  10   2   17.80    7.20
  -3  10   2   10.60    5.50
   2 -10  -2   96.59   20.60
   2 -10  -2   82.89   12.10
  -2  10   2   92.59   10.80
  -2  10   2   77.99   12.60
  -2  10   2   99.89   13.90
  -2  10   2   98.29   17.80
  -2  10   2   72.19   12.20
   1 -10  -2  131.29   13.60
   1 -10  -2   86.79   13.20
  -1  10   2  116.99   16.50
  -1  10   2  137.69   15.20
  -1  10   2  148.39   16.40
  -1  10   2  110.39   20.50
  -1  10   2  124.39   22.40
   0 -10  -2    4.00    5.10
   0 -10  -2   22.70    6.00
   0  10   2   17.30    7.90
   0  10   2    6.90    9.30
   0  10   2    4.30   11.90
   0  10   2   15.60   11.00
   0  10   2   14.10    8.30
   0  10   2   17.80    9.90
  -1 -10  -2  114.29   14.30
  -1 -10  -2  141.49   14.60
   1  10   2  148.49   19.30
   1  10   2  148.19   19.20
   1  10   2  119.59   24.90
   1  10   2  136.89   17.80
   1  10   2  138.29   16.20
  -2 -10  -2   83.39   10.10
   2  10   2   81.59   15.50
   2  10   2   94.69   14.00
   2  10   2   75.29   15.60
   2  10   2   81.99   14.50
   3  10   2   16.30    6.90
   3  10   2   11.20    6.90
   3  10   2   20.20   10.90
   2 -11  -2   24.70    5.40
   2 -11  -2   17.40    9.60
  -2  11   2   18.50    6.70
  -2  11   2   15.90    5.10
   1 -11  -2   27.30    5.20
   1 -11  -2   22.10    8.30
   1 -11  -2   13.50    6.10
  -1  11   2   22.90    9.90
  -1  11   2    1.00    9.60
  -1  11   2    8.90    6.20
  -1  11   2   19.10    7.60
   0 -11  -2   82.89   11.70
   0  11   2   46.50   12.40
   0  11   2   55.49   10.70
   0  11   2   76.19   15.00
  -1 -11  -2   25.90    6.40
  -1 -11  -2   19.30    4.80
   1  11   2   18.30    6.60
   1  11   2   25.90   11.40
   1  11   2   15.30    6.40
   1  11   2   20.80    8.80
   2  11   2   12.20    5.80
   2  11   2   16.90    9.90
   2  11   2   15.40    7.20
   2  11  -3   71.39   14.20
   2  11  -3   42.90   11.30
   1  11  -3   13.90    8.00
   1  11  -3   -0.10    9.80
   1  11  -3    9.90    8.40
   1  11  -3    5.00    6.50
   1  11  -3    6.10    5.70
  -1 -11   3   10.40    5.70
  -1 -11   3    6.10    6.60
   0  11  -3   32.00    7.40
   0  11  -3   34.40    6.70
   0  11  -3   40.20   10.70
   0  11  -3   21.90    8.80
   0 -11   3   23.50    7.50
   0 -11   3   37.00    8.60
  -1  11  -3    2.30    5.60
  -1  11  -3    9.20    5.60
  -1  11  -3    9.40    8.10
   1 -11   3    5.60    5.00
   1 -11   3   13.00    6.80
   1 -11   3    3.90    5.40
  -2  11  -3   41.30    8.70
  -2  11  -3   55.59    8.90
   2 -11   3   50.19    8.60
   3  10  -3    8.00   11.50
   3  10  -3    6.00    7.10
   2  10  -3   80.09   13.00
   2  10  -3   92.09   22.60
   2  10  -3   79.39   15.70
   2  10  -3   68.89   13.40
   2  10  -3   98.39   17.30
   1  10  -3  153.48   17.40
   1  10  -3  154.18   17.40
   1  10  -3  141.79   20.50
   1  10  -3  142.99   25.70
   1  10  -3  172.78   20.60
  -1 -10   3  129.69   15.90
  -1 -10   3  145.59   17.10
   0  10  -3   39.00   11.50
   0  10  -3   25.70   14.20
   0  10  -3   51.39    9.20
   0  10  -3   23.60    9.80
   0  10  -3   34.80    8.50
   0 -10   3   29.70    7.50
   0 -10   3   34.00    8.70
   0 -10   3   37.80   12.70
   0 -10   3   40.50    7.60
  -1  10  -3  170.98   19.80
  -1  10  -3  183.38   18.00
  -1  10  -3  170.18   17.20
   1 -10   3  139.29   15.80
   1 -10   3  170.08   19.20
   1 -10   3  154.28   21.10
   1 -10   3  112.99   17.80
  -2  10  -3   85.29   16.10
  -2  10  -3  100.79   14.10
   2 -10   3  106.09   12.70
  -3  10  -3    5.50    7.40
  -3  10  -3    6.30    5.10
  -3  10  -3    8.80    6.00
   3 -10   3   14.60    6.30
   3 -10   3    4.80    6.80
  -4  10  -3   19.00    6.10
   4 -10   3   16.50    8.00
   4   9  -3   67.99   14.50
   3   9  -3   28.20    8.20
   3   9  -3   38.90   13.60
   3   9  -3   23.80    8.80
   2   9  -3   15.30   12.00
   2   9  -3   22.70    8.90
   2   9  -3   11.90    8.50
   2   9  -3   18.20   13.40
   2   9  -3   16.30    7.70
  -2  -9   3   27.60    6.00
   1   9  -3  128.59   19.50
   1   9  -3  141.19   16.30
   1   9  -3  128.69   20.50
   1   9  -3  129.59   18.00
   1   9  -3  104.99   25.60
  -1  -9   3  104.59   13.70
  -1  -9   3  110.89   14.10
   0   9  -3   -2.60    8.10
   0   9  -3    2.20   12.10
   0   9  -3   10.30   10.40
   0   9  -3    7.00    7.40
   0   9  -3   -2.20    8.00
   0  -9   3  -13.10    6.30
   0  -9   3   -7.50    6.30
  -1   9  -3  128.59   15.60
  -1   9  -3  116.39   17.90
  -1   9  -3  127.89   16.20
   1  -9   3   94.09   13.80
   1  -9   3  101.99   12.80
   1  -9   3   80.59   15.60
   1  -9   3  107.59   14.50
   1  -9   3  130.49   22.00
  -2   9  -3    6.60    6.90
  -2   9  -3   19.80    9.60
   2  -9   3    6.10   13.80
   2  -9   3    7.50    7.40
   2  -9   3   15.00    6.60
  -3   9  -3   45.50    8.80
  -3   9  -3   46.60   10.10
  -3   9  -3   52.49   11.80
   3  -9   3   48.80   14.60
   3  -9   3   47.50    8.50
  -4   9  -3  106.69   13.80
  -4   9  -3  125.79   13.20
   4  -9   3  107.19   18.70
   4  -9   3  111.09   13.10
   4   8  -3    8.40   15.10
   3   8  -3   21.50    8.80
   3   8  -3   35.20    8.50
   3   8  -3   23.90   13.40
   2   8  -3   23.10    9.40
   2   8  -3   10.70   12.10
   2   8  -3   26.70    8.30
   2   8  -3   30.10   13.40
   2   8  -3    8.30    8.30
  -2  -8   3   33.60    7.20
   1   8  -3  158.48   18.60
   1   8  -3  160.68   21.10
   1   8  -3  161.48   21.40
   1   8  -3  139.49   16.60
   1   8  -3  139.99   25.10
   1   8  -3  159.58   18.70
  -1  -8   3  120.29   14.20
   0   8  -3    8.50   10.60
   0   8  -3   21.70    8.40
   0   8  -3   14.20    8.90
   0   8  -3   -2.40    9.70
   0   8  -3   -3.80   19.80
   0   8  -3   -4.10    6.90
   0   8  -3   14.40   11.90
   0  -8   3    1.50    5.70
   0  -8   3    3.90   16.40
   0  -8   3    5.10    8.20
   0  -8   3   -2.20    5.30
  -1   8  -3  137.19   15.00
  -1   8  -3  177.48   16.30
  -1   8  -3  129.59   16.30
  -1   8  -3  132.99   17.40
  -1   8  -3   84.59   19.20
   1  -8   3  138.69   15.40
   1  -8   3  127.49   16.00
   1  -8   3  124.09   15.70
   1  -8   3  136.89   14.80
  -2   8  -3   37.40   13.10
  -2   8  -3   43.10   10.20
  -2   8  -3   32.90    8.30
  -2   8  -3   68.99   15.20
   2  -8   3   28.00    7.40
   2  -8   3    5.40   13.80
   2  -8   3   18.90    7.50
  -3   8  -3   33.40    8.40
   3  -8   3   27.10   13.90
  -4   8  -3   16.50    7.40
   4  -8   3   26.10    6.50
   4  -8   3   22.00   12.10
  -5   8  -3   27.80    6.60
   5  -8   3   33.90    6.60
   5  -8   3   29.80   10.90
   4   7  -3    5.20    8.30
   3   7  -3   58.49   16.20
   3   7  -3   54.99   10.20
   3   7  -3   58.69   14.70
   2   7  -3   85.29   11.00
   2   7  -3   65.59   12.70
  -2  -7   3   89.59   21.20
  -2  -7   3   75.09   12.90
   1   7  -3    6.30    6.50
  -1  -7   3   17.60    4.10
  -1  -7   3   17.70   15.10
  -1  -7   3   23.40    8.20
   0   7  -3   -1.20    6.50
   0  -7   3   -7.20    4.00
   0  -7   3    3.40    7.30
   0  -7   3    1.60   13.50
   0  -7   3    5.40    4.10
  -1   7  -3   24.50    7.30
  -1   7  -3   16.70    7.30
  -1   7  -3   16.30    8.90
   1  -7   3    4.30   14.60
   1  -7   3   16.20    8.50
   1  -7   3    6.10    5.30
   1  -7   3   11.80    5.70
  -2   7  -3   81.09   16.10
  -2   7  -3   98.39   15.10
   2  -7   3   97.99   14.30
   2  -7   3   46.90   15.30
  -3   7  -3   91.99   15.60
  -3   7  -3   71.29   13.10
  -3   7  -3   66.19   14.00
   3  -7   3   70.89   15.70
   3  -7   3   76.49   12.60
  -4   7  -3   35.70    9.50
  -4   7  -3   35.10    8.30
   4  -7   3   13.60   12.20
   4  -7   3   17.60    6.40
  -5   7  -3   17.80    6.90
  -5   7  -3   31.40    7.20
   5  -7   3   22.50    7.00
   5  -7   3   14.60   11.50
   6  -7   3    1.90    4.70
   6  -7   3    6.00    5.10
   6   6  -3   37.00    6.20
   5   6  -3   20.30    5.10
   4   6  -3  133.59   18.50
   3   6  -3  137.89   13.10
   3   6  -3   93.29   14.80
   2   6  -3  477.85   40.70
   2   6  -3  438.36   40.30
   2   6  -3  482.45   39.70
  -2  -6   3  510.65   40.90
   1   6  -3  664.03   56.19
   1   6  -3  678.33   55.49
  -1  -6   3  730.83   56.79
  -1  -6   3  704.43   57.59
  -1  -6   3  648.34   54.39
   0   6  -3   20.40    6.10
   0   6  -3    9.80    7.30
   0  -6   3   17.80    7.00
   0  -6   3   13.70    5.20
   0  -6   3   31.30   13.50
   0  -6   3   14.80    3.90
  -1   6  -3  691.73   53.89
  -1   6  -3  690.63   54.39
  -1   6  -3  673.13   55.09
   1  -6   3  640.14   54.09
   1  -6   3  632.84   52.99
   1  -6   3  591.54   57.59
   1  -6   3  647.74   54.69
  -2   6  -3  491.45   41.60
  -2   6  -3  525.85   41.10
   2  -6   3  454.75   41.60
   2  -6   3  427.96   40.70
  -3   6  -3  115.09   16.40
  -3   6  -3  129.29   16.90
   3  -6   3   83.69   15.40
   3  -6   3  120.49   16.60
  -4   6  -3  165.08   21.50
  -4   6  -3  188.28   18.80
  -4   6  -3  164.48   19.20
   4  -6   3  209.88   21.00
   4  -6   3  169.88   19.10
   4  -6   3  178.38   24.00
   5  -6   3   31.10    7.60
   5  -6   3   38.80   12.10
  -6   6  -3   38.10    6.30
  -6   6  -3   54.09    9.50
   6  -6   3   49.20    8.90
   6  -6   3   33.00    8.20
   6   5  -3   30.30    7.00
   5   5  -3   72.29   10.20
   5   5  -3   73.79   15.50
   4   5  -3  384.36   31.60
   4   5  -3  353.26   31.70
   4   5  -3  341.07   30.40
   4   5  -3  334.07   38.20
   3   5  -3  246.38   23.30
   3   5  -3  270.07   22.20
  -3  -5   3  230.18   22.90
   2   5  -3  707.43   54.89
   2   5  -3  660.83   55.29
   2   5  -3  665.03   55.69
  -2  -5   3  668.13   55.79
   1   5  -3  188.78   16.90
   1   5  -3  186.48   18.20
   1   5  -3  175.28   17.60
  -1  -5   3  205.98   18.30
  -1  -5   3  185.98   17.00
   0   5  -3  316.97   28.70
   0   5  -3  299.87   26.00
   0   5  -3  277.57   25.00
   0  -5   3  264.37   24.80
   0  -5   3  294.27   25.70
  -1   5  -3  205.78   19.40
  -1   5  -3  221.08   34.70
  -1   5  -3  222.38   18.40
  -1   5  -3  196.48   17.80
   1  -5   3  178.88   18.60
   1  -5   3  185.48   21.80
   1  -5   3  164.58   16.70
   1  -5   3  164.78   17.80
  -2   5  -3  667.93   56.49
  -2   5  -3  665.73   66.49
  -2   5  -3  678.63   55.29
  -2   5  -3  676.33   56.09
   2  -5   3  714.73   56.69
   2  -5   3  664.53   56.19
  -3   5  -3  259.97   25.10
  -3   5  -3  243.78   24.90
   3  -5   3  261.77   25.10
   3  -5   3  247.38   25.30
  -4   5  -3  342.07   32.10
  -4   5  -3  352.16   35.80
  -4   5  -3  400.56   35.90
  -4   5  -3  420.06   34.30
   4  -5   3  374.96   35.90
   4  -5   3  473.35   37.70
   4  -5   3  369.06   33.80
   4  -5   3  347.27   38.10
  -5   5  -3   79.99    9.70
  -5   5  -3   81.49   13.40
   5  -5   3   87.79   12.90
   5  -5   3  103.79   19.90
  -6   5  -3   37.00    6.40
  -6   5  -3   34.30    9.80
   6  -5   3   24.80    8.60
   6  -5   3   41.80    7.40
   7   4  -3   39.30    5.80
   6   4  -3   45.40    8.00
   5   4  -3  104.69   15.40
   5   4  -3   86.39   11.60
   5   4  -3   88.99   16.10
  -5  -4   3  107.49   11.10
   4   4  -3   44.40    8.30
   4   4  -3   62.09    9.10
   4   4  -3   48.00   12.70
  -4  -4   3   41.20    8.20
  -4  -4   3   37.50    8.20
   3   4  -3  166.08   16.00
   3   4  -3  159.58   14.70
   3   4  -3  154.28   16.20
  -3  -4   3  129.29   15.30
  -3  -4   3  153.88   14.80
   2   4  -3  621.54   49.70
   2   4  -3  595.04   49.90
   2   4  -3  708.13   50.49
  -2  -4   3  561.24   49.50
  -2  -4   3  587.24   49.80
   1   4  -3  588.24   44.00
   1   4  -3  513.75   44.30
   1   4  -3  559.44   43.70
  -1  -4   3  519.85   46.50
  -1  -4   3  562.94   43.80
  -1  -4   3  492.75   43.30
   0   4  -3  706.13   55.39
   0   4  -3  642.94   55.89
   0   4  -3  731.23   64.99
   0   4  -3  687.73   55.59
   0  -4   3  683.83   55.69
   0  -4   3  650.83   58.09
   0  -4   3  720.23   56.09
  -1   4  -3  603.24   46.00
  -1   4  -3  568.94   45.60
  -1   4  -3  564.94   46.50
  -1   4  -3  602.24   55.99
   1  -4   3  544.75   46.20
   1  -4   3  538.25   47.90
   1  -4   3  525.15   49.30
   1  -4   3  530.95   46.00
  -2   4  -3  619.54   51.79
  -2   4  -3  625.24   51.49
  -2   4  -3  606.74   50.49
  -2   4  -3  639.74   60.49
   2  -4   3  621.94   51.69
   2  -4   3  626.64   51.69
  -3   4  -3  176.38   18.20
  -3   4  -3  192.38   18.50
   3  -4   3  140.49   17.20
   3  -4   3  146.09   18.00
  -4   4  -3   49.50   12.20
  -4   4  -3   37.40    9.70
   4  -4   3   65.39   11.80
   4  -4   3   41.90   11.90
  -5   4  -3   95.19   14.40
  -5   4  -3   96.89   10.20
   5  -4   3   97.49   13.20
   5  -4   3   85.79   17.90
  -6   4  -3   40.00    7.10
  -6   4  -3   41.40    9.00
   6  -4   3   32.30    9.30
   6  -4   3   31.10    9.10
   6  -4   3   55.49    9.80
  -7   4  -3   37.70    7.90
  -7   4  -3   45.30    5.80
   7  -4   3   36.50    7.10
   7   3  -3   47.90    7.10
   7   3  -3   49.10    6.40
  -7  -3   3   25.40    6.40
   6   3  -3   68.39   11.80
   6   3  -3   46.90    9.20
   6   3  -3   65.79   13.10
  -6  -3   3   49.90    9.20
  -6  -3   3   50.59    9.10
   5   3  -3  296.67   24.80
   5   3  -3  282.27   26.50
   5   3  -3  255.77   26.20
   5   3  -3  249.38   23.50
  -5  -3   3  266.17   23.30
   4   3  -3  156.58   15.50
   4   3  -3  145.79   18.30
   4   3  -3  140.19   16.50
  -4  -3   3  167.78   18.50
  -4  -3   3  170.28   17.00
   3   3  -3   81.29   11.20
   3   3  -3   72.39   11.10
   3   3  -3   81.39    9.70
  -3  -3   3   79.69   12.10
  -3  -3   3   82.69   11.00
   2   3  -3   88.69    9.30
   2   3  -3   84.99   10.00
   2   3  -3   76.49    9.00
   2   3  -3   96.59   10.20
  -2  -3   3   49.70   13.10
   1   3  -3  583.84   48.80
   1   3  -3  638.34   48.70
  -1  -3   3  588.84   51.29
  -1  -3   3  605.54   48.80
   0   3  -3  347.77   30.70
   0   3  -3  387.26   30.10
   0   3  -3  348.27   30.20
   0   3  -3  354.66   38.40
   0  -3   3  387.96   30.40
   0  -3   3  360.96   33.00
   0  -3   3  370.56   29.90
   0  -3   3  388.46   30.70
  -1   3  -3  536.85   48.40
  -1   3  -3  574.34   55.09
  -1   3  -3  549.74   47.70
   1  -3   3  620.74   48.20
   1  -3   3  660.43   48.30
   1  -3   3  577.24   47.50
   1  -3   3  631.24   51.39
  -2   3  -3   47.00    7.80
  -2   3  -3   40.40   10.70
  -2   3  -3   48.00   10.40
  -2   3  -3   51.49   21.50
   2  -3   3   85.09    9.80
   2  -3   3   80.09   18.30
   2  -3   3   72.89    8.40
   2  -3   3   86.09   10.10
  -3   3  -3   97.59   13.20
  -3   3  -3   82.19   12.90
   3  -3   3   75.09   10.80
   3  -3   3   68.29   10.40
   3  -3   3   81.89   12.50
  -4   3  -3  218.68   21.60
  -4   3  -3  245.88   22.70
   4  -3   3  137.69   20.90
  -5   3  -3  288.97   29.90
  -5   3  -3  287.27   26.90
  -5   3  -3  280.37   23.70
  -5   3  -3  274.77   23.60
   5  -3   3  237.28   26.00
   5  -3   3  293.87   25.00
   5  -3   3  288.77   28.60
  -6   3  -3   65.59    8.10
  -6   3  -3   42.40    9.60
  -6   3  -3   38.70    9.10
   6  -3   3   47.00    9.60
   6  -3   3   61.89   10.00
   6  -3   3   31.60    9.70
  -7   3  -3   28.40    7.30
  -7   3  -3   31.00    8.80
  -7   3  -3   31.60    5.90
   7  -3   3   50.59    7.90
   7  -3   3   28.70    5.90
   7   2  -3    9.20    5.10
   7   2  -3   12.80    3.80
  -7  -2   3    2.00    3.70
  -7  -2   3    6.00    5.20
   6   2  -3   20.90    6.70
   6   2  -3   20.80    6.70
   6   2  -3   18.00    5.10
  -6  -2   3   17.50    5.50
  -6  -2   3   19.40    5.90
   5   2  -3   19.00    8.90
   5   2  -3   21.90    6.70
   5   2  -3   15.20    6.10
   5   2  -3    3.50    9.40
   5   2  -3   20.00    5.20
  -5  -2   3   18.90    5.40
   4   2  -3  189.58   19.20
   4   2  -3  188.98   20.30
  -4  -2   3  214.98   20.20
  -4  -2   3  219.28   17.50
  -4  -2   3  204.08   22.00
   3   2  -3  183.38   17.20
   3   2  -3  210.28   17.80
   3   2  -3  188.98   16.20
  -3  -2   3  142.99   18.20
  -3  -2   3  138.39   16.80
   2   2  -3 1537.75  123.79
   2   2  -3 1705.73  124.09
   2   2  -3 1642.94  124.49
  -2  -2   3 1562.84  126.99
  -2  -2   3 1343.27  123.99
   1   2  -3 1595.34  124.59
   1   2  -3 1437.16  123.69
   1   2  -3 1289.77  121.39
   1   2  -3 1596.24  121.19
   1   2  -3 1530.15  121.09
   1   2  -3 1767.32  121.49
  -1  -2   3 1360.76  121.09
  -1  -2   3 1526.35  121.09
  -1  -2   3 1648.94  123.19
   0   2  -3    6.60    4.40
   0   2  -3   -1.70    8.60
   0   2  -3    3.40    2.60
   0   2  -3   -3.20    8.80
   0   2  -3    2.80    2.90
   0  -2   3    4.90    6.50
   0  -2   3    1.60    2.60
   0  -2   3    5.10    3.20
  -1   2  -3 1636.24  129.39
  -1   2  -3 1420.06  125.59
  -1   2  -3 1450.35  127.09
   1  -2   3 1640.54  127.59
   1  -2   3 1587.94  125.09
   1  -2   3 1666.23  125.49
   1  -2   3 1641.64  125.39
  -2   2  -3 1463.05  125.29
  -2   2  -3 1531.15  129.09
  -2   2  -3 1497.15  125.29
   2  -2   3 1597.54  128.39
   2  -2   3 1701.23  125.19
   2  -2   3 1582.24  126.29
   2  -2   3 1584.84  124.79
   2  -2   3 1573.24  124.69
  -3   2  -3  140.09   16.90
  -3   2  -3  159.08   18.30
  -3   2  -3  160.48   18.20
   3  -2   3  191.48   17.60
   3  -2   3  169.98   19.10
   3  -2   3  177.58   16.50
   3  -2   3  163.68   15.80
  -4   2  -3  260.07   23.50
  -4   2  -3  182.28   21.10
  -4   2  -3  221.38   18.60
  -4   2  -3  231.78   22.20
   4  -2   3  179.78   23.30
   4  -2   3  181.88   21.50
  -5   2  -3   16.40    7.60
  -5   2  -3   20.10    4.70
  -5   2  -3   33.60   11.00
  -5   2  -3   19.80    4.60
  -5   2  -3   27.10    6.00
   5  -2   3   20.00    5.90
   5  -2   3   16.70    8.10
  -6   2  -3   17.70    4.20
  -6   2  -3   22.00    8.30
  -6   2  -3   22.50    4.80
   6  -2   3   25.20    5.70
   6  -2   3   12.80    8.20
   6  -2   3   15.40    8.20
  -7   2  -3   10.90    3.50
  -7   2  -3   11.30    6.00
  -7   2  -3    6.60    5.80
   7  -2   3   -3.30    5.20
   7  -2   3    7.90    5.00
   7   1  -3  128.29   12.70
   7   1  -3   97.79   13.60
   7   1  -3  105.89   11.10
   7   1  -3  143.09   12.90
  -7  -1   3  125.39   11.90
  -7  -1   3  103.29   11.50
   6   1  -3   28.40    6.50
   6   1  -3   27.30    7.00
   6   1  -3   23.80    5.20
   6   1  -3   38.20    8.90
  -6  -1   3   29.40    6.00
  -6  -1   3   25.10    6.20
   5   1  -3   31.00    7.70
   5   1  -3   27.20    8.50
  -5  -1   3   41.10    8.00
  -5  -1   3   52.49   12.50
  -5  -1   3   25.90    5.60
  -5  -1   3   41.00    9.00
   4   1  -3  100.89   11.60
   4   1  -3   95.99   12.90
  -4  -1   3   70.89   14.40
  -4  -1   3   64.39   11.80
  -4  -1   3   85.79    9.20
   3   1  -3  748.93   62.39
   3   1  -3  780.52   63.09
  -3  -1   3  777.42   63.49
  -3  -1   3  773.62   62.69
   2   1  -3  114.79   13.60
   2   1  -3  130.89   12.40
   2   1  -3  118.69   11.80
   2   1  -3  113.19   11.80
   2   1  -3  127.29   11.50
  -2  -1   3  110.89   17.10
  -2  -1   3   89.39   12.70
  -2  -1   3   97.49   11.60
   1   1  -3 1938.11  158.38
   1   1  -3 2165.58  158.48
   1   1  -3 2071.39  159.18
  -1  -1   3 1820.22  158.28
  -1  -1   3 1999.50  159.88
   0   1  -3   14.40    5.50
   0  -1   3   28.60    6.80
  -1   1  -3 1978.50  158.78
  -1   1  -3 1679.83  155.98
   1  -1   3 2029.40  155.78
   1  -1   3 1858.71  155.58
   1  -1   3 2079.19  157.58
   1  -1   3 2169.38  156.78
  -2   1  -3  103.99   20.20
  -2   1  -3  119.79   14.10
   2  -1   3  112.09   10.80
   2  -1   3  113.49   11.30
   2  -1   3  111.29   15.20
   2  -1   3  115.29   11.70
   2  -1   3  114.79   11.90
  -3   1  -3  737.53   63.39
  -3   1  -3  881.61   64.29
  -3   1  -3  811.52   63.79
   3  -1   3  652.13   65.39
   3  -1   3  720.63   62.79
   3  -1   3  800.12   64.09
   3  -1   3  792.02   63.29
   3  -1   3  776.92   62.79
  -4   1  -3   92.49   15.50
  -4   1  -3   91.99    9.40
  -4   1  -3   80.29   14.00
  -4   1  -3   84.99   14.60
   4  -1   3   82.79   12.80
   4  -1   3   75.29   15.20
   4  -1   3   83.49   12.90
  -5   1  -3   41.50    7.00
  -5   1  -3   38.00   11.40
  -5   1  -3   25.00    9.30
  -5   1  -3   38.10    7.20
   5  -1   3   22.10    8.60
   5  -1   3   32.80    9.90
  -6   1  -3   31.50    5.40
  -6   1  -3   33.10    8.70
  -6   1  -3   30.10    7.00
  -6   1  -3   36.30    7.40
   6  -1   3   36.60    7.00
   6  -1   3   27.10    8.40
   6  -1   3   44.40    8.80
  -7   1  -3  105.49   13.20
  -7   1  -3  101.89   10.90
  -7   1  -3  104.29   13.40
  -7   1  -3  135.79   10.70
   7  -1   3  117.39   11.90
   7  -1   3  114.39   12.10
   7   0  -3   57.59    9.60
   7   0  -3   79.49   11.00
   7   0  -3   62.69   10.00
  -7   0   3   54.79    7.90
  -7   0   3   52.49    7.90
   6   0  -3    1.10    5.00
   6   0  -3    1.90    6.10
   6   0  -3    7.10    8.00
  -6   0   3    0.60    4.80
  -6   0   3    2.40    4.20
  -6   0   3    5.90    4.70
   5   0  -3   16.70    6.90
   5   0  -3   18.90    8.50
  -5   0   3   26.40    7.90
  -5   0   3   18.50    5.20
  -5   0   3   13.60    8.10
  -5   0   3   25.60    5.60
   4   0  -3  371.46   29.30
   4   0  -3  333.37   29.10
   4   0  -3  302.77   30.00
  -4   0   3  343.37   30.60
  -4   0   3  300.77   29.20
  -4   0   3  326.47   27.50
   3   0  -3  426.26   34.70
   3   0  -3  436.96   34.80
   3   0  -3  405.36   35.60
  -3   0   3  409.26   35.70
  -3   0   3  386.66   34.80
   2   0  -3 2014.60  159.88
   2   0  -3 2014.30  160.68
   2   0  -3 2005.70  159.88
   2   0  -3 2116.89  160.28
  -2   0   3 1965.70  159.88
  -2   0   3 1957.70  160.18
   1   0  -3 3145.29  258.07
   1   0  -3 3153.28  258.17
   1   0  -3 3281.07  258.67
  -1   0   3 3407.56  259.47
  -1   0   3 3324.87  257.97
   0   0  -3    0.00    3.90
   0   0   3    0.20    4.00
  -1   0  -3 2930.81  263.77
  -1   0  -3 3374.86  267.47
  -1   0  -3 3633.54  264.57
   1   0   3 3247.28  263.47
   1   0   3 3467.05  264.87
   1   0   3 3606.74  264.97
   1   0   3 3073.69  263.37
  -2   0  -3 1990.60  164.58
  -2   0  -3 2027.50  161.18
   2   0   3 2093.89  160.58
   2   0   3 1982.20  162.98
   2   0   3 2053.99  160.58
   2   0   3 1980.50  160.78
   2   0   3 2010.00  160.88
  -3   0  -3  447.86   38.00
  -3   0  -3  433.76   38.00
   3   0   3  421.96   37.10
   3   0   3  408.76   36.50
   3   0   3  456.95   36.50
   3   0   3  422.06   36.40
  -4   0  -3  284.37   30.70
  -4   0  -3  359.16   31.80
  -4   0  -3  366.26   27.50
  -4   0  -3  318.77   31.20
   4   0   3  327.67   30.10
   4   0   3  326.87   31.10
   4   0   3  317.67   29.60
  -5   0  -3   28.40   10.30
  -5   0  -3   25.60    5.00
  -5   0  -3   23.20    8.80
  -5   0  -3   24.80    6.50
   5   0   3   23.70    9.40
  -6   0  -3    3.60    3.90
  -6   0  -3    7.10    4.30
  -6   0  -3    7.20    3.90
  -6   0  -3    2.30    6.80
   6   0   3   -2.20    5.10
   6   0   3    2.60    6.70
   6   0   3    4.70    3.40
   6   0   3    3.50    7.10
  -7   0  -3   51.49    7.60
  -7   0  -3   68.59    8.90
  -7   0  -3   51.79    9.70
   7   0   3   58.09    7.80
   7   0   3   46.90    6.20
   7   0   3   46.50    8.60
   7   0   3   62.69    9.90
   7  -1  -3  132.69   13.50
   7  -1  -3  125.49   15.10
  -7   1   3  122.99   12.00
  -7   1   3  120.49   15.30
  -7   1   3  137.29   11.90
   6  -1  -3   43.30    8.20
   6  -1  -3   50.89   10.10
   6  -1  -3   50.49   11.10
  -6   1   3   34.40    8.10
  -6   1   3   30.00    6.30
  -6   1   3   44.80    8.50
  -6   1   3   39.30    7.70
   5  -1  -3   59.29   12.80
   5  -1  -3   61.59   13.70
   5  -1  -3   72.59   11.70
  -5   1   3   49.30   11.60
  -5   1   3   48.60    9.40
  -5   1   3   54.99   12.90
  -5   1   3   64.89    9.20
   4  -1  -3   87.29   11.70
   4  -1  -3   70.79   13.40
   4  -1  -3   74.59   11.10
  -4   1   3   75.99    9.20
  -4   1   3   80.69   11.50
  -4   1   3   71.89   12.70
   3  -1  -3  704.93   56.59
   3  -1  -3  702.13   57.39
   3  -1  -3  720.63   56.69
   3  -1  -3  720.63   56.99
  -3   1   3  690.13   57.09
  -3   1   3  679.73   56.49
  -3   1   3  625.64   56.99
   2  -1  -3   96.19   13.00
   2  -1  -3   93.89   10.50
   2  -1  -3   84.89   11.10
   2  -1  -3   84.49   10.30
   2  -1  -3   73.49   10.10
  -2   1   3   92.79    9.80
  -2   1   3   89.59   11.10
   1  -1  -3 1652.53  141.59
   1  -1  -3 1723.33  142.39
  -1   1   3 1881.41  141.39
  -1   1   3 1875.21  141.59
   0  -1  -3   49.20    9.10
   0  -1  -3   29.60    8.20
   0   1   3   43.00    8.30
  -1  -1  -3 1959.30  147.49
  -1  -1  -3 1990.40  150.38
   1   1   3 1933.41  148.69
   1   1   3 1724.53  146.69
   1   1   3 1732.33  146.89
   1   1   3 1773.22  146.69
  -2  -1  -3   80.59   11.80
  -2  -1  -3   96.19   18.40
   2   1   3   88.49   15.10
   2   1   3   78.09   10.00
   2   1   3   75.89    8.80
   2   1   3   76.59    9.70
   2   1   3   81.89   10.20
  -3  -1  -3  631.14   57.39
  -3  -1  -3  702.33   57.59
   3   1   3  689.53   56.69
   3   1   3  747.43   56.19
   3   1   3  669.23   56.79
  -4  -1  -3   82.09   16.10
  -4  -1  -3   75.39   14.50
  -4  -1  -3   76.99   13.90
  -4  -1  -3   78.89    8.20
   4   1   3   63.49   12.00
   4   1   3   54.89   12.90
  -5  -1  -3   30.30   10.40
  -5  -1  -3   65.49    8.30
  -5  -1  -3   44.90   12.00
  -5  -1  -3   66.79    8.10
   5   1   3   66.89   13.10
   5   1   3   54.39   13.10
  -6  -1  -3   48.30    8.50
  -6  -1  -3   42.00    7.70
  -6  -1  -3   42.20    7.50
   6   1   3   58.19   10.40
   6   1   3   48.40    7.70
   6   1   3   51.49   10.00
   6   1   3   55.09   12.30
  -7  -1  -3  131.99   12.40
  -7  -1  -3  121.79   12.20
   7   1   3  141.39   13.50
   7   1   3  120.59   11.70
   7   1   3  140.09   12.50
   7  -2  -3    9.00    5.60
   7  -2  -3    7.20    6.90
  -7   2   3    7.70    3.30
  -7   2   3    8.00    7.10
   6  -2  -3   24.60    7.90
   6  -2  -3   46.60    7.40
   6  -2  -3   38.50    6.90
   6  -2  -3   33.50   10.10
  -6   2   3   38.70    7.30
  -6   2   3   35.50    7.90
   5  -2  -3   24.80    6.60
   5  -2  -3   41.30    9.50
   5  -2  -3   20.30    7.10
   5  -2  -3   34.20    9.40
  -5   2   3   24.30    5.60
  -5   2   3   16.60    4.60
  -5   2   3   13.70    5.00
   4  -2  -3  122.09   14.80
   4  -2  -3  121.29   14.00
   4  -2  -3  126.09   15.50
   4  -2  -3  124.49   14.40
  -4   2   3   90.99   11.30
  -4   2   3  104.69   14.30
  -4   2   3  101.39   12.70
   3  -2  -3  205.48   19.10
   3  -2  -3  211.98   19.00
   3  -2  -3  181.48   19.00
   3  -2  -3  184.68   19.80
  -3   2   3  201.88   19.20
  -3   2   3  186.98   17.90
  -3   2   3  205.78   18.50
   2  -2  -3 1450.55  117.29
   2  -2  -3 1218.58  115.99
   2  -2  -3 1423.06  116.09
   2  -2  -3 1444.66  115.99
  -2   2   3 1467.85  115.49
  -2   2   3 1681.13  116.09
  -2   2   3 1475.45  115.69
   1  -2  -3 1646.84  126.99
   1  -2  -3 1653.53  128.09
   1  -2  -3 1511.55  129.39
  -1   2   3 1729.43  126.69
  -1   2   3 1468.95  126.29
  -1   2   3 1563.04  126.69
   0  -2  -3   -0.60    7.50
   0  -2  -3    3.90    9.30
   0   2   3    8.20    3.50
   0   2   3   13.90    3.70
   0   2   3    5.30    3.60
  -1  -2  -3 1704.23  135.39
  -1  -2  -3 1648.83  133.99
   1   2   3 1721.23  133.19
   1   2   3 1522.45  130.69
   1   2   3 1717.93  131.19
   1   2   3 1581.04  130.99
   1   2   3 1636.54  130.79
  -2  -2  -3 1340.87  113.99
  -2  -2  -3 1468.65  116.59
   2   2   3 1205.28  110.99
   2   2   3 1443.56  114.99
   2   2   3 1477.75  111.99
   2   2   3 1442.76  111.19
  -3  -2  -3  201.88   20.40
   3   2   3  214.78   19.30
   3   2   3  160.18   17.80
  -4  -2  -3   79.09   17.20
  -4  -2  -3  118.39   17.20
  -4  -2  -3  111.89   10.80
   4   2   3  119.49   15.40
   4   2   3  138.99   14.40
  -5  -2  -3   23.40    4.70
  -5  -2  -3   18.60    4.80
  -5  -2  -3   11.90    9.80
   5   2   3   24.90    5.60
   5   2   3   29.40    7.00
   5   2   3   31.60    7.70
   5   2   3   30.10    5.20
  -6  -2  -3   41.20    7.30
  -6  -2  -3   34.80    7.90
   6   2   3   43.20    9.50
   6   2   3   43.20    7.90
   6   2   3   29.90    5.50
   6   2   3   46.80    9.60
  -7  -2  -3    4.70    3.40
   7   2   3    9.40    4.00
   7   2   3   12.00    4.80
   7  -3  -3   49.80    9.10
   7  -3  -3   32.30    8.30
  -7   3   3   39.20    6.20
  -7   3   3   47.80    9.50
   6  -3  -3   68.19   11.40
   6  -3  -3   48.90   11.50
   6  -3  -3   59.49   10.90
   6  -3  -3   48.70    9.30
  -6   3   3   66.39   13.30
  -6   3   3   59.79    9.00
   5  -3  -3  294.07   27.10
   5  -3  -3  268.67   25.70
   5  -3  -3  260.17   24.80
   5  -3  -3  278.17   24.80
  -5   3   3  247.38   23.80
  -5   3   3  287.07   23.40
   4  -3  -3  168.58   17.80
   4  -3  -3  161.28   16.80
   4  -3  -3  158.38   17.60
   4  -3  -3  151.18   18.40
  -4   3   3  124.39   16.00
  -4   3   3  126.79   15.80
   3  -3  -3   72.49   11.00
   3  -3  -3   62.39   12.10
   3  -3  -3   63.19   10.70
   3  -3  -3   63.89   15.50
  -3   3   3   57.39    9.80
  -3   3   3   75.69   10.10
   2  -3  -3   83.29   11.00
   2  -3  -3   91.29   12.10
   2  -3  -3   76.19   15.10
   2  -3  -3   64.39   11.70
  -2   3   3  111.79   11.10
  -2   3   3  125.59   11.30
  -2   3   3  116.89   11.70
   1  -3  -3  516.75   49.70
   1  -3  -3  634.54   52.39
   1  -3  -3  594.84   50.39
   1  -3  -3  568.64   54.29
  -1   3   3  639.94   49.60
  -1   3   3  644.14   50.49
  -1   3   3  722.03   49.99
   0  -3  -3  515.45   44.80
   0  -3  -3  502.95   42.50
   0  -3  -3  496.95   47.60
   0   3   3  505.95   42.40
   0   3   3  486.25   43.70
   0   3   3  555.54   42.60
   0   3   3  584.34   42.50
  -1  -3  -3  635.84   49.80
  -1  -3  -3  660.83   53.79
   1   3   3  616.44   48.40
   1   3   3  568.84   48.70
   1   3   3  640.64   49.00
   1   3   3  512.85   48.10
   1   3   3  571.74   47.60
   1   3   3  577.14   51.29
  -2  -3  -3   79.09   17.50
  -2  -3  -3   97.89   22.10
   2   3   3   80.59   16.30
   2   3   3   82.49   11.40
   2   3   3   90.79   10.50
  -3  -3  -3   77.39   14.60
   3   3   3   83.69   12.20
   3   3   3   67.29   10.90
  -4  -3  -3  101.19   23.50
  -4  -3  -3  126.39   19.30
  -4  -3  -3  134.39   12.20
   4   3   3  176.58   18.30
  -5  -3  -3  280.07   25.20
   5   3   3  314.97   26.50
   5   3   3  289.97   26.00
   5   3   3  314.77   26.60
   5   3   3  318.97   27.10
  -6  -3  -3   56.99    8.10
  -6  -3  -3   42.40    8.40
   6   3   3   64.49    9.80
   6   3   3   70.79   11.40
   6   3   3   71.39    9.00
   6   3   3   60.09   10.30
  -7  -3  -3   33.40    6.30
   7   3   3   45.00    5.50
   7   3   3   30.80    7.20
   7   3   3   39.70    6.50
   7  -4  -3   21.10    7.00
  -7   4   3   18.60    3.80
   6  -4  -3   62.99   10.70
   6  -4  -3   54.29   11.50
  -6   4   3   48.70    8.40
  -6   4   3   43.40   11.80
   5  -4  -3   66.69   11.10
   5  -4  -3   57.79   12.40
   5  -4  -3   72.29   15.70
  -5   4   3   76.99   13.80
  -5   4   3   62.99    9.90
   4  -4  -3   35.10    9.00
   4  -4  -3   36.20    9.00
   4  -4  -3   28.10    8.80
  -4   4   3   50.09   11.30
  -4   4   3   43.00    8.90
   3  -4  -3  115.39   14.20
   3  -4  -3  131.49   15.50
   3  -4  -3  126.29   20.70
  -3   4   3  125.49   14.40
  -3   4   3  128.19   13.30
   2  -4  -3  574.44   47.00
   2  -4  -3  488.45   48.30
   2  -4  -3  584.14   49.80
  -2   4   3  545.25   46.60
  -2   4   3  576.24   45.80
  -2   4   3  579.14   46.30
   1  -4  -3  557.54   51.29
   1  -4  -3  610.94   48.60
   1  -4  -3  555.04   45.50
  -1   4   3  515.45   44.60
  -1   4   3  598.64   45.50
  -1   4   3  487.35   44.70
  -1   4   3  557.14   46.00
   0  -4  -3  627.44   51.09
   0  -4  -3  600.94   54.69
   0  -4  -3  576.24   48.00
   0   4   3  582.94   48.10
   0   4   3  615.04   47.90
   0   4   3  544.95   48.40
   0   4   3  583.14   48.00
  -1  -4  -3  550.84   52.89
  -1  -4  -3  549.85   48.30
   1   4   3  575.44   46.70
   1   4   3  655.63   47.70
   1   4   3  499.85   48.70
   1   4   3  510.15   46.10
   1   4   3  607.54   46.30
  -2  -4  -3  563.94   56.29
  -2  -4  -3  526.35   52.29
   2   4   3  567.94   45.90
   2   4   3  560.34   46.90
  -3  -4  -3  167.58   29.10
  -3  -4  -3  125.99   19.30
   3   4   3  127.59   15.10
   3   4   3  135.09   17.00
  -4  -4  -3   45.90   11.30
   4   4   3   38.50   10.50
  -5  -4  -3   57.39    7.70
   5   4   3   67.89   10.40
   5   4   3   66.19   10.00
   5   4   3   65.29    9.20
   5   4   3   75.99   11.20
  -6  -4  -3   45.80    7.60
  -6  -4  -3   41.50    9.20
   6   4   3   56.59    9.20
   6   4   3   64.09   10.40
   6   4   3   55.29    7.60
   7   4   3   33.90    4.70
   6  -5  -3   14.00    9.90
   6  -5  -3   12.20    6.50
  -6   5   3   13.40    6.60
  -6   5   3   16.90    4.50
   5  -5  -3   54.69   12.50
   5  -5  -3   83.79   14.00
  -5   5   3   62.29   11.00
  -5   5   3   63.99    9.20
   4  -5  -3  279.47   30.50
   4  -5  -3  314.57   33.60
   4  -5  -3  311.77   28.90
   4  -5  -3  349.07   31.30
  -4   5   3  305.87   29.60
  -4   5   3  317.27   27.60
  -4   5   3  325.97   27.70
   3  -5  -3  287.87   26.80
   3  -5  -3  287.67   34.60
  -3   5   3  272.07   26.10
   2  -5  -3  734.03   66.89
   2  -5  -3  724.73   63.99
  -2   5   3  796.92   64.29
  -2   5   3  834.42   63.79
   1  -5  -3  167.18   26.20
   1  -5  -3  179.48   16.20
   1  -5  -3  151.18   16.20
   1  -5  -3  195.18   22.40
  -1   5   3  157.58   18.50
  -1   5   3  140.59   14.80
  -1   5   3  146.49   16.70
   0  -5  -3  434.66   44.60
   0  -5  -3  414.66   39.50
   0  -5  -3  407.06   35.30
   0   5   3  402.76   35.30
   0   5   3  418.06   35.50
   0   5   3  446.56   36.30
  -1  -5  -3  153.88   27.00
  -1  -5  -3  168.28   21.60
   1   5   3  158.08   17.50
   1   5   3  196.58   17.30
   1   5   3  200.28   20.00
  -2  -5  -3  811.02   72.99
   2   5   3  757.72   65.39
   2   5   3  790.62   64.29
  -3  -5  -3  251.57   29.60
  -3  -5  -3  306.27   43.80
   3   5   3  281.27   25.70
   3   5   3  284.87   27.80
  -4  -5  -3  278.87   33.60
   4   5   3  345.17   27.80
   4   5   3  304.77   32.40
  -5  -5  -3   60.39    7.90
   5   5   3   86.79    9.40
   5   5   3   74.59   10.60
   5   5   3   69.19   11.40
   6   5   3   22.50    5.70
   6   5   3   20.00    4.00
   6  -6  -3   29.00    9.40
   6  -6  -3   44.80    7.40
  -6   6   3   42.50    6.10
   5  -6  -3   11.60    7.40
   5  -6  -3   14.80   10.10
  -5   6   3    7.70    4.20
  -5   6   3   16.80    7.00
   4  -6  -3  192.78   20.70
   4  -6  -3  180.48   22.40
  -4   6   3  194.08   18.20
  -4   6   3  171.68   21.60
  -4   6   3  231.78   20.50
  -4   6   3  209.48   19.50
   3  -6  -3  133.39   17.20
  -3   6   3  142.19   17.30
   2  -6  -3  448.46   43.80
   2  -6  -3  480.85   39.30
  -2   6   3  407.66   38.70
  -2   6   3  457.35   40.40
   1  -6  -3  625.74   52.39
   1  -6  -3  612.94   56.69
   1  -6  -3  650.93   50.89
   1  -6  -3  667.83   62.09
  -1   6   3  579.84   52.19
   0  -6  -3   16.10   13.10
   0  -6  -3    4.70    2.80
   0  -6  -3   17.60   15.80
   0  -6  -3    9.60    6.40
   0   6   3   14.00    7.20
   0   6   3   13.20    5.90
  -1  -6  -3  594.74   54.49
  -1  -6  -3  615.04   61.69
  -1  -6  -3  590.24   48.30
   1   6   3  637.74   50.59
  -2  -6  -3  505.95   56.59
   2   6   3  468.95   42.70
   2   6   3  492.35   41.60
  -3  -6  -3  147.29   22.60
  -3  -6  -3  262.27   66.59
   3   6   3  154.48   19.70
   3   6   3  142.99   17.20
   4   6   3  218.38   20.60
   5   6   3    9.80    6.00
   6   6   3   45.90    6.50
   6   6   3   66.09    8.60
   6  -7  -3    9.40    4.70
   5  -7  -3   14.70    9.20
   5  -7  -3   20.20    7.40
  -5   7   3   11.10    6.90
  -5   7   3   23.90    6.60
   4  -7  -3   25.20    9.80
   4  -7  -3   30.90    7.30
   4  -7  -3   13.70   10.30
  -4   7   3   19.20    7.50
  -4   7   3   21.60    7.10
   3  -7  -3   70.79   16.30
   3  -7  -3   49.20   11.20
   3  -7  -3   59.89   16.10
  -3   7   3   48.40    9.30
  -3   7   3   54.69   14.30
  -3   7   3   45.50   10.70
  -3   7   3   43.20    8.20
   2  -7  -3   59.79   13.20
   2  -7  -3  106.99   22.20
  -2   7   3   96.39   15.60
   1  -7  -3   19.90    4.90
   1  -7  -3   48.70   19.70
   1  -7  -3   43.40   16.00
   1  -7  -3   17.90    7.50
   1  -7  -3   26.10    5.40
  -1   7   3   13.70    8.00
   0  -7  -3    3.70    3.50
   0  -7  -3    0.60    2.90
   0  -7  -3    9.80   17.70
   0  -7  -3    8.00   13.60
   0   7   3    2.30    6.10
   0   7   3   -2.90    8.00
  -1  -7  -3   32.50   21.10
  -1  -7  -3   15.00   13.80
  -1  -7  -3   19.00    3.50
   1   7   3   20.10    7.50
  -2  -7  -3   80.19    8.00
  -2  -7  -3  135.79   46.50
  -2  -7  -3  158.18   45.00
   2   7   3  101.09   15.10
   3   7   3   72.79   18.30
   3   7   3   61.59   11.90
   5   7   3   13.30    6.20
   5  -8  -3   26.70    6.40
  -5   8   3   15.50    5.90
  -5   8   3   22.00    6.10
   4  -8  -3   18.50    6.70
  -4   8   3   27.20    7.40
  -4   8   3   22.30    7.70
   3  -8  -3   44.90   13.60
   3  -8  -3   23.60    7.50
  -3   8   3   37.80    8.80
  -3   8   3   38.20    8.50
  -3   8   3   31.80    7.90
   2  -8  -3   23.60    6.40
   2  -8  -3   27.50    7.50
  -2   8   3   42.60    7.90
  -2   8   3   15.70    7.20
  -2   8   3   15.90    7.50
  -2   8   3   22.50    9.80
  -2   8   3   41.90   13.40
   1  -8  -3   82.09   13.20
   1  -8  -3   88.79   12.30
   1  -8  -3   86.09   10.40
   1  -8  -3   74.29   11.70
  -1   8   3   98.09   13.30
  -1   8   3   98.99   19.20
  -1   8   3   92.99   11.90
  -1   8   3  110.99   16.70
  -1   8   3  104.19   21.60
  -1   8   3  109.39   13.70
  -1   8   3  114.29   19.70
   0  -8  -3   25.00   22.40
   0  -8  -3    5.40    4.10
   0  -8  -3   14.40   16.20
   0  -8  -3    7.50    5.00
   0   8   3   13.10    7.00
   0   8   3    4.60    7.60
   0   8   3   17.30    9.70
   0   8   3   10.10   10.30
   0   8   3   13.00    9.90
   0   8   3   11.60   12.60
  -1  -8  -3  111.59   11.10
  -1  -8  -3  103.09   10.20
   1   8   3   90.89   15.20
   1   8   3  105.69   18.80
   1   8   3  101.29   17.00
   1   8   3  110.19   16.00
   1   8   3  119.59   24.10
  -2  -8  -3   28.30    6.10
   2   8   3   28.40    9.40
   2   8   3   17.40   13.50
   2   8   3   59.89   12.70
   2   8   3   31.40    9.30
  -3  -8  -3   49.00    7.80
   3   8   3   48.20    9.00
   3   8   3   34.60   10.30
   4   8   3   22.00    8.40
   4   8   3   26.90    7.50
   5   8   3   22.00    6.10
   4  -9  -3  104.19   11.30
  -4   9   3   85.59   12.70
  -4   9   3   85.79   11.80
   3  -9  -3   38.70   12.70
   3  -9  -3   42.40    7.90
  -3   9   3   41.20    8.80
  -3   9   3   28.30    8.30
  -3   9   3   24.50    7.80
   2  -9  -3   20.30    7.30
   2  -9  -3   31.70   13.80
   2  -9  -3   44.00   10.60
  -2   9   3   10.50    7.90
  -2   9   3   11.60    7.60
  -2   9   3   20.30    7.10
  -2   9   3   19.00   13.00
   1  -9  -3   52.59   11.70
   1  -9  -3   57.99    9.90
   1  -9  -3   56.69   11.60
  -1   9   3  109.09   19.60
  -1   9   3   69.49   13.30
  -1   9   3   96.99   14.60
  -1   9   3   83.99   14.70
  -1   9   3   68.19   13.00
  -1   9   3  104.49   21.90
   0  -9  -3    5.80    5.60
   0  -9  -3   12.50    4.70
   0  -9  -3    0.20    4.70
   0   9   3   26.30   16.10
   0   9   3   13.30   12.80
   0   9   3    1.50    7.60
   0   9   3    0.50    8.10
   0   9   3   12.10    8.40
   0   9   3   12.50   10.20
  -1  -9  -3   94.29   11.30
  -1  -9  -3   78.69    9.60
   1   9   3   91.09   18.40
   1   9   3   72.29   15.50
   1   9   3   82.19   13.90
   1   9   3  103.99   16.20
   1   9   3  102.99   22.40
  -2  -9  -3   18.60    5.20
   2   9   3    3.90    8.30
   2   9   3   18.90    8.60
   2   9   3   10.10   13.20
   2   9   3    9.50    8.70
  -3  -9  -3   39.60    6.90
   3   9   3   39.90    8.90
   3   9   3   47.30   14.80
   3   9   3   31.20   17.80
   4   9   3   94.39   14.60
   4   9   3   94.19   11.90
  -4  10   3    4.60    4.30
  -4  10   3    4.10    5.30
   3 -10  -3    3.10    5.70
   3 -10  -3   13.20    9.90
  -3  10   3   -1.20    6.30
  -3  10   3    1.60    4.90
  -3  10   3    1.00    6.00
  -3  10   3    2.60    5.30
   2 -10  -3   64.39   11.50
   2 -10  -3   83.59   19.40
  -2  10   3   86.29   10.30
  -2  10   3   87.69   17.30
  -2  10   3   62.79   11.40
  -2  10   3   70.69   12.70
   1 -10  -3   94.29   12.60
   1 -10  -3   75.89   12.60
  -1  10   3  114.29   19.80
  -1  10   3  143.39   14.40
  -1  10   3  118.39   15.40
  -1  10   3   98.49   21.40
  -1  10   3  134.69   15.30
   0 -10  -3   19.60    7.20
   0 -10  -3   58.09    9.30
   0 -10  -3   23.80    5.80
   0  10   3   36.60    8.50
   0  10   3   42.20   11.90
   0  10   3   32.60   12.40
   0  10   3   28.50    8.90
  -1 -10  -3  125.69   13.10
  -1 -10  -3  130.49   13.50
   1  10   3   99.39   23.40
   1  10   3  128.99   17.70
   1  10   3   91.39   17.40
   1  10   3  112.79   14.60
   1  10   3  109.59   16.40
  -2 -10  -3   75.19    9.60
   2  10   3   69.69   13.50
   2  10   3   84.09   13.90
   2  10   3   87.59   22.00
   2  10   3   68.29   14.40
   3  10   3   -1.40   12.20
   3  10   3    5.70    6.60
   3  10   3    0.10    6.00
   2 -11  -3   45.60   10.50
   2 -11  -3   45.00    7.80
  -2  11   3   29.20    6.00
  -2  11   3   37.40    7.40
   1 -11  -3   12.60    4.80
   1 -11  -3   -1.70    5.30
   1 -11  -3   10.80    8.40
  -1  11   3    0.30    9.50
  -1  11   3   -5.70    6.50
  -1  11   3    6.00    5.90
  -1  11   3    5.60    9.30
   0  11   3   52.69   11.10
   0  11   3   47.90   11.60
   0  11   3   43.90    8.50
   0  11   3   61.19    9.90
  -1 -11  -3    2.00    4.30
  -1 -11  -3   14.20    5.90
   1  11   3    6.70    8.60
   1  11   3   -1.30   10.50
   1  11   3    4.30    5.40
   1  11   3    4.40    5.60
  -2 -11  -3   56.39    9.20
   2  11   3   35.60   10.60
   2  11   3   32.60    8.20
   2  11   3   49.10   10.30
   2  11  -4   18.30    8.50
   2  11  -4    9.00    5.00
   2  11  -4   18.20   10.10
   1  11  -4    5.10    8.80
   1  11  -4    6.10   10.10
   1  11  -4    3.70    7.50
   1  11  -4    1.40    6.70
   1  11  -4    4.40    5.50
  -1 -11   4    9.30    8.50
  -1 -11   4    1.40    6.00
   0  11  -4   -3.30    8.00
   0  11  -4    4.30    6.10
   0  11  -4    3.10    5.50
   0  11  -4   -4.00    9.40
   0 -11   4   -1.10    6.80
   0 -11   4    2.10    8.10
  -1  11  -4    9.70    8.10
  -1  11  -4    1.20    5.40
  -1  11  -4    2.90    5.30
   1 -11   4    6.70    6.70
   1 -11   4   -6.50    5.30
   1 -11   4    3.50    4.30
  -2  11  -4    3.50    6.90
  -2  11  -4    8.40    5.10
   2 -11   4    4.00    4.20
   2 -11   4    8.90    5.30
   3  10  -4   10.90   12.10
   3  10  -4    8.60    7.90
   3  10  -4    2.40    6.00
   2  10  -4   -2.90    9.10
   2  10  -4    2.60   11.80
   2  10  -4   10.10    8.50
   2  10  -4    4.30    6.60
   1  10  -4   17.70    9.50
   1  10  -4   33.00    8.70
   1  10  -4   12.90   12.90
   1  10  -4   22.00    7.30
   1  10  -4   22.40   11.30
  -1 -10   4    8.60    6.90
  -1 -10   4   18.00    7.20
   0  10  -4   14.20   10.80
   0  10  -4    4.20   12.80
   0  10  -4    4.20    8.10
   0  10  -4    8.10    9.80
   0  10  -4    9.10    7.20
   0 -10   4   -4.70    6.30
   0 -10   4    1.10    6.70
   0 -10   4   -5.20    8.10
  -1  10  -4   33.00   10.90
  -1  10  -4   12.10    7.30
  -1  10  -4   15.20    7.90
   1 -10   4   15.30   10.00
   1 -10   4   22.30    6.60
   1 -10   4   13.00    8.90
   1 -10   4    4.90    7.50
  -2  10  -4    9.90    8.90
  -2  10  -4    1.30    6.40
   2 -10   4    4.80    6.50
   2 -10   4    7.40    7.70
  -3  10  -4   -0.80    7.00
  -3  10  -4   11.40    6.10
  -3  10  -4    0.00    5.00
   3 -10   4   20.80    6.60
   3 -10   4   11.10    6.10
   4   9  -4   12.80   12.20
   3   9  -4   17.60    7.50
   3   9  -4   -0.10    7.70
   3   9  -4   19.20   13.00
   2   9  -4   40.50    9.80
   2   9  -4   42.30   14.50
   2   9  -4   52.09   16.30
   2   9  -4   23.20   12.50
   2   9  -4   32.70    8.70
  -2  -9   4   42.40    7.20
   1   9  -4   33.60   12.50
   1   9  -4   34.20    9.40
   1   9  -4   40.70   13.90
   1   9  -4   30.20    8.70
   1   9  -4   18.50    9.30
  -1  -9   4   31.10    6.90
  -1  -9   4   32.10    7.30
   0   9  -4  203.58   28.30
   0   9  -4  164.28   22.70
   0   9  -4  196.38   19.50
   0   9  -4  170.68   19.90
   0   9  -4  176.78   23.50
   0  -9   4  155.78   18.60
   0  -9   4  179.08   18.20
   0  -9   4  163.98   17.60
  -1   9  -4   18.90   10.70
  -1   9  -4   15.10    8.50
  -1   9  -4   31.80    8.30
   1  -9   4   21.50    6.90
   1  -9   4   29.90   13.70
   1  -9   4   29.90    6.90
   1  -9   4   16.00    8.30
  -2   9  -4   35.10    8.50
  -2   9  -4   51.99   11.10
  -2   9  -4   62.19   11.30
   2  -9   4   53.79   14.70
   2  -9   4   30.70    8.70
   2  -9   4   49.50    8.20
  -3   9  -4    6.60    7.10
  -3   9  -4   14.50    8.50
  -3   9  -4    7.00    6.90
   3  -9   4   23.80   12.80
   3  -9   4   10.60    6.90
  -4   9  -4   14.10    6.40
   4  -9   4   18.40    9.90
   4  -9   4   27.00    6.40
   4   8  -4   -2.20   13.60
   4   8  -4   13.60    6.70
   3   8  -4   23.50   13.30
   3   8  -4   23.60    8.70
   3   8  -4   48.60   15.30
   2   8  -4  104.89   23.00
   2   8  -4   65.49   10.80
   2   8  -4   56.59   14.60
   2   8  -4   79.59   17.60
   2   8  -4   76.09   13.70
  -2  -8   4   70.19    9.90
   1   8  -4  150.08   15.90
   1   8  -4   99.59   23.90
   1   8  -4  140.39   20.40
   1   8  -4  122.59   19.30
   1   8  -4  116.29   17.20
  -1  -8   4  113.79   12.50
  -1  -8   4  103.89   12.70
   0   8  -4  555.24   46.90
   0   8  -4  563.14   48.50
   0   8  -4  581.64   51.39
   0   8  -4  528.65   46.80
   0   8  -4  538.35   49.40
   0  -8   4  560.64   46.00
   0  -8   4  560.04   46.00
  -1   8  -4  124.09   15.80
  -1   8  -4  103.19   14.70
  -1   8  -4  121.59   17.20
  -1   8  -4  110.49   12.90
   1  -8   4  114.99   14.70
   1  -8   4   85.49   20.80
   1  -8   4   80.19   14.40
   1  -8   4  107.29   13.20
   1  -8   4  104.89   12.80
  -2   8  -4   89.49   13.40
  -2   8  -4   72.09   15.90
  -2   8  -4   63.69   15.30
   2  -8   4   80.69   12.30
   2  -8   4   76.19   13.80
   2  -8   4  105.49   22.50
  -3   8  -4   19.00    9.60
  -3   8  -4   44.40    8.70
   3  -8   4   30.80    7.10
   3  -8   4   25.90   13.30
  -4   8  -4   16.60    6.60
  -4   8  -4    8.10    7.20
   4  -8   4   21.80    6.90
   4  -8   4   15.20   11.50
  -5   8  -4  125.49   12.40
  -5   8  -4   89.99   11.80
   5  -8   4   93.99   16.40
   5  -8   4   89.29   11.80
   4   7  -4  213.28   33.70
   4   7  -4  206.08   23.00
   3   7  -4    7.30   12.70
   3   7  -4   10.40    7.70
   3   7  -4    2.20    8.20
   2   7  -4  148.99   14.00
   2   7  -4  118.99   15.20
  -2  -7   4  125.49   11.70
  -2  -7   4   95.59   15.30
  -2  -7   4   88.69   23.30
   1   7  -4    7.20    6.90
  -1  -7   4    3.90    4.00
  -1  -7   4    8.20    7.60
  -1  -7   4   13.80   15.40
   0   7  -4  164.18   18.10
   0  -7   4  165.78   18.80
   0  -7   4  169.68   16.10
   0  -7   4  177.18   16.30
   0  -7   4  166.88   25.60
  -1   7  -4    2.60    6.20
  -1   7  -4    2.00    8.10
   1  -7   4    5.30    6.30
   1  -7   4   -0.70    5.90
   1  -7   4    0.80    5.50
   1  -7   4    3.60   13.50
   1  -7   4   -2.50    7.80
  -2   7  -4   97.59   16.00
  -2   7  -4  114.59   17.60
   2  -7   4  125.99   16.50
   2  -7   4  124.39   15.30
  -3   7  -4    3.10    7.20
  -3   7  -4   10.70    6.40
  -3   7  -4    7.60    7.90
   3  -7   4   18.30   12.40
   3  -7   4    2.50    5.90
  -4   7  -4  268.47   24.50
  -4   7  -4  247.08   24.50
   4  -7   4  278.57   29.60
   4  -7   4  256.07   23.80
  -5   7  -4   -3.40    6.00
  -5   7  -4    5.00    5.90
   5  -7   4    6.70    6.30
   5  -7   4    6.30   11.00
   6  -7   4   99.29   13.40
   6  -7   4  127.19   12.30
   6   6  -4    5.80    3.50
   5   6  -4   19.60    5.10
   5   6  -4   16.20    7.80
   4   6  -4   25.90    5.50
   4   6  -4   15.50    8.70
   3   6  -4   43.30    8.40
   3   6  -4   34.30    8.40
  -3  -6   4   53.49   11.90
   2   6  -4   27.50    7.30
  -2  -6   4   34.80    9.30
  -2  -6   4   34.60    8.20
   1   6  -4   41.20    7.90
   1   6  -4   45.30    7.90
  -1  -6   4   36.80    8.20
  -1  -6   4   58.89   10.70
  -1  -6   4   37.90    5.80
   0   6  -4   47.40   12.30
   0   6  -4   54.39   10.10
   0  -6   4   55.49    7.60
   0  -6   4   58.19   10.70
   0  -6   4   47.50    9.30
   0  -6   4   68.49   18.20
  -1   6  -4   39.10    7.40
  -1   6  -4   34.50    8.50
  -1   6  -4   52.09   10.90
   1  -6   4   42.70    9.70
   1  -6   4   37.10    6.20
   1  -6   4   31.40    8.60
   1  -6   4   48.00   13.60
  -2   6  -4   40.70    9.10
  -2   6  -4   57.19   11.10
  -2   6  -4   32.20    9.10
   2  -6   4   40.90    9.80
   2  -6   4   41.10    8.90
  -3   6  -4   50.49    9.60
  -3   6  -4   37.40    9.10
   3  -6   4   25.70    9.60
   3  -6   4   46.30   10.60
  -4   6  -4   15.40    8.30
  -4   6  -4   19.00    7.60
  -4   6  -4   25.00    7.40
   4  -6   4   29.80    7.80
   4  -6   4   15.00   10.90
   4  -6   4   28.80    9.50
  -5   6  -4   18.80    4.50
  -5   6  -4   27.20    7.70
   5  -6   4   28.60    7.60
   5  -6   4   10.90   11.50
  -6   6  -4    2.90    3.40
  -6   6  -4    8.70    5.70
   6  -6   4    5.00    5.50
   6  -6   4   -3.10    6.30
   6  -6   4    0.70    8.00
   6   5  -4    3.50    4.10
   5   5  -4   65.89   14.00
   5   5  -4  108.69   11.50
   5   5  -4   86.89   16.20
   4   5  -4  153.88   15.30
   4   5  -4  157.98   19.70
   3   5  -4  537.45   41.30
   3   5  -4  525.15   42.40
  -3  -5   4  432.66   41.20
   2   5  -4   56.19    9.60
   2   5  -4   71.09    9.00
  -2  -5   4   79.99    9.40
   1   5  -4  238.88   20.00
   1   5  -4  232.28   20.90
   1   5  -4  221.38   19.40
  -1  -5   4  207.58   19.60
  -1  -5   4  206.08   20.60
   0   5  -4   57.69   19.40
   0   5  -4   51.29    8.80
   0   5  -4   38.20    7.60
   0  -5   4   46.40    6.60
   0  -5   4   37.70    8.40
   0  -5   4   56.99    9.80
  -1   5  -4  204.28   34.50
  -1   5  -4  195.88   21.20
  -1   5  -4  212.48   19.80
  -1   5  -4  254.77   20.40
   1  -5   4  216.58   23.80
   1  -5   4  199.88   19.10
   1  -5   4  230.78   20.80
   1  -5   4  224.18   20.40
  -2   5  -4   86.69   10.90
  -2   5  -4   80.39   12.90
  -2   5  -4   74.29   11.90
  -2   5  -4   95.19   29.40
   2  -5   4   83.09   12.80
   2  -5   4   76.29   12.10
  -3   5  -4  443.16   42.20
  -3   5  -4  483.65   42.50
   3  -5   4  488.25   42.60
   3  -5   4  542.45   43.20
  -4   5  -4  182.18   18.90
  -4   5  -4  168.28   15.70
  -4   5  -4  176.88   21.20
   4  -5   4  182.38   23.00
   4  -5   4  158.18   18.50
  -5   5  -4  114.99   11.30
  -5   5  -4  104.39   14.70
   5  -5   4  114.59   14.30
   5  -5   4  107.49   21.20
  -6   5  -4   15.70    4.20
  -6   5  -4   11.80    6.30
   6  -5   4    9.00    6.10
   6  -5   4   12.20    7.40
   6  -5   4    4.80    9.50
   7   4  -4   13.40    3.20
   6   4  -4   21.20    7.80
   6   4  -4   37.30    8.00
   5   4  -4   90.39   11.30
   5   4  -4   92.79   15.00
   5   4  -4  106.49   16.20
  -5  -4   4   79.69   11.00
   4   4  -4  120.09   13.80
   4   4  -4  109.99   15.20
  -4  -4   4  120.49   15.00
  -4  -4   4  162.48   14.00
   3   4  -4  415.56   36.50
   3   4  -4  423.16   35.60
  -3  -4   4  442.56   35.70
   2   4  -4  314.67   28.20
   2   4  -4  300.97   27.60
   2   4  -4  339.67   27.50
  -2  -4   4  342.47   27.70
  -2  -4   4  334.57   27.30
   1   4  -4  991.10   79.69
   1   4  -4  935.31   80.29
   1   4  -4  926.21   79.89
  -1  -4   4 1019.40   82.89
  -1  -4   4 1063.69   79.99
  -1  -4   4 1044.80   79.59
   0   4  -4  276.07   33.90
   0   4  -4  231.58   20.10
   0   4  -4  223.88   21.00
   0   4  -4  241.98   20.50
   0  -4   4  224.78   24.30
   0  -4   4  234.18   20.60
   0  -4   4  220.78   19.60
   0  -4   4  240.88   21.10
  -1   4  -4 1037.00   80.99
  -1   4  -4 1107.79   81.49
  -1   4  -4 1102.49   89.79
  -1   4  -4 1069.49   80.79
   1  -4   4  983.70   81.29
   1  -4   4  874.21   80.39
   1  -4   4  974.50   81.29
   1  -4   4  918.31   82.59
  -2   4  -4  322.77   28.90
  -2   4  -4  348.97   29.60
  -2   4  -4  314.27   39.70
  -2   4  -4  350.26   28.10
   2  -4   4  327.87   29.20
   2  -4   4  314.57   29.30
  -3   4  -4  437.16   36.50
  -3   4  -4  439.66   36.50
   3  -4   4  399.06   36.40
   3  -4   4  366.56   35.50
  -4   4  -4  158.78   17.80
  -4   4  -4  131.39   18.80
   4  -4   4   82.99   20.50
   4  -4   4  137.39   18.40
  -5   4  -4  100.29   14.50
  -5   4  -4   68.99   17.50
  -5   4  -4   94.49   14.40
  -5   4  -4   96.59   10.50
   5  -4   4  103.19   13.20
   5  -4   4  119.49   18.60
  -6   4  -4   37.60    9.40
  -6   4  -4   27.60    8.00
  -6   4  -4   45.00    6.70
   6  -4   4   28.80    6.80
   6  -4   4   21.10    9.20
   6  -4   4   27.00    8.50
  -7   4  -4   17.90    5.40
  -7   4  -4   19.20    3.60
   7  -4   4   14.60    4.70
   7   3  -4  103.09   10.50
   7   3  -4  108.19   10.00
  -7  -3   4   91.99   10.10
   6   3  -4    8.70    4.70
   6   3  -4    2.40    6.20
   6   3  -4    4.60    6.60
  -6  -3   4    8.00    4.90
  -6  -3   4    3.70    5.20
   5   3  -4   65.59    9.90
   5   3  -4   72.99   11.60
   5   3  -4   48.50   10.80
   5   3  -4   66.59   14.70
  -5  -3   4   53.99    9.70
   4   3  -4  149.29   15.80
   4   3  -4  169.88   17.20
  -4  -3   4  163.78   13.80
  -4  -3   4  136.79   16.60
   3   3  -4  119.39   12.60
   3   3  -4  101.19   11.30
   3   3  -4  105.89   13.00
  -3  -3   4   87.19   12.10
   2   3  -4  434.26   37.90
   2   3  -4  495.45   37.60
   2   3  -4  456.45   37.40
  -2  -3   4  452.85   37.70
  -2  -3   4  447.16   37.40
   1   3  -4  537.05   46.70
   1   3  -4  619.34   47.30
   1   3  -4  562.14   46.70
   1   3  -4  556.44   52.99
  -1  -3   4  632.84   47.00
  -1  -3   4  552.84   49.60
   0   3  -4 1303.17  106.29
   0   3  -4 1323.67  100.09
   0   3  -4 1160.68  100.39
   0   3  -4 1211.38  100.29
   0  -3   4 1285.07  100.59
   0  -3   4 1255.77  100.09
   0  -3   4 1280.47  100.49
   0  -3   4 1258.17  102.59
  -1   3  -4  623.04   54.49
  -1   3  -4  561.24   47.40
   1  -3   4  564.84   47.00
   1  -3   4  518.25   46.40
   1  -3   4  576.64   50.39
   1  -3   4  618.64   47.30
  -2   3  -4  518.65   47.30
  -2   3  -4  471.55   39.70
  -2   3  -4  405.06   39.20
  -2   3  -4  497.65   38.50
   2  -3   4  462.55   39.20
   2  -3   4  423.06   38.60
   2  -3   4  519.35   39.70
  -3   3  -4  118.19   15.20
  -3   3  -4  112.69   14.90
   3  -3   4  120.99   14.70
   3  -3   4  109.79   13.00
   3  -3   4  107.19   14.10
  -4   3  -4  173.58   19.40
  -4   3  -4  197.68   20.30
   4  -3   4  128.59   18.70
   4  -3   4  146.39   21.60
  -5   3  -4   78.39    8.70
  -5   3  -4   74.49    8.60
  -5   3  -4   56.89   13.30
  -5   3  -4   56.69   13.00
   5  -3   4   79.59   11.20
   5  -3   4   63.49   13.50
   5  -3   4   71.19   12.70
  -6   3  -4   -0.30    7.00
  -6   3  -4    1.40    6.70
  -6   3  -4    0.80    3.90
   6  -3   4    4.30    5.80
   6  -3   4    0.40    7.60
   6  -3   4    4.90    7.90
  -7   3  -4   83.29   10.80
  -7   3  -4   71.09    9.30
   7  -3   4   81.49    9.40
   7  -3   4   90.09    9.90
   7   2  -4   70.99    8.90
   7   2  -4   46.20    9.50
   7   2  -4   57.09    7.80
  -7  -2   4   58.39    8.40
   6   2  -4   89.29   12.80
   6   2  -4   61.99   13.10
   6   2  -4   74.09   10.60
  -6  -2   4   85.19   11.20
  -6  -2   4   78.29   11.10
   5   2  -4  109.59   17.30
   5   2  -4  112.29   14.50
   5   2  -4  124.79   15.80
   5   2  -4  119.99   13.70
  -5  -2   4  118.09   13.30
  -5  -2   4  146.09   13.70
   4   2  -4   52.09    9.30
   4   2  -4   41.30    9.80
  -4  -2   4   44.70   10.30
  -4  -2   4   59.39   12.20
  -4  -2   4   43.60    6.50
   3   2  -4  581.24   45.50
   3   2  -4  611.84   46.30
  -3  -2   4  529.55   45.90
  -3  -2   4  490.55   46.50
   2   2  -4 3137.69  223.48
   2   2  -4 2737.23  223.38
   2   2  -4 2951.40  223.08
  -2  -2   4 2742.63  225.78
  -2  -2   4 2495.45  223.08
   1   2  -4 2174.18  164.88
   1   2  -4 2151.18  168.08
   1   2  -4 2035.00  164.78
   1   2  -4 1952.60  167.58
  -1  -2   4 2176.88  166.98
  -1  -2   4 1999.90  164.88
  -1  -2   4 2076.09  164.78
   0   2  -4 3276.27  249.48
   0   2  -4 3072.09  252.27
   0   2  -4 3173.78  253.17
   0   2  -4 3219.18  249.68
   0   2  -4 2688.83  249.58
   0  -2   4 3606.74  249.78
   0  -2   4 2933.81  249.48
   0  -2   4 3274.27  251.37
  -1   2  -4 2240.48  170.18
  -1   2  -4 1992.20  167.68
  -1   2  -4 1870.51  165.68
   1  -2   4 2090.39  165.28
   1  -2   4 1841.12  165.08
   1  -2   4 2204.68  165.48
   1  -2   4 2227.68  166.38
   1  -2   4 2156.28  167.98
   1  -2   4 2158.68  165.68
  -2   2  -4 2606.34  215.98
  -2   2  -4 2702.23  220.38
  -2   2  -4 2751.32  216.08
   2  -2   4 2722.93  215.48
   2  -2   4 2583.34  219.08
   2  -2   4 2841.02  215.98
   2  -2   4 2791.42  215.48
  -3   2  -4  560.24   49.20
  -3   2  -4  561.04   49.10
   3  -2   4  604.14   50.09
   3  -2   4  577.24   48.10
   3  -2   4  602.94   48.90
  -4   2  -4   54.19    7.20
  -4   2  -4   49.00   13.10
  -4   2  -4   45.00   10.50
   4  -2   4   56.19   10.60
   4  -2   4   24.30    9.60
  -5   2  -4  123.59   12.10
  -5   2  -4  122.39   12.40
  -5   2  -4  120.99   21.20
  -5   2  -4  109.19   15.60
  -5   2  -4  117.39   12.00
   5  -2   4  122.09   16.10
   5  -2   4  126.39   13.40
   5  -2   4  153.98   18.00
  -6   2  -4   96.89    9.80
  -6   2  -4   82.09   13.40
  -6   2  -4  101.39    9.70
   6  -2   4   89.79   14.00
   6  -2   4   58.49   13.20
   6  -2   4   72.89   11.30
  -7   2  -4   55.39    9.40
  -7   2  -4   77.69    7.60
  -7   2  -4   57.49   10.00
   7  -2   4   56.99    8.80
   7  -2   4   69.29    8.60
   7   1  -4   23.30    5.40
   7   1  -4   23.10    6.00
   7   1  -4   37.70    6.40
  -7  -1   4   21.30    4.90
   6   1  -4  576.24   48.70
   6   1  -4  581.74   47.90
   6   1  -4  636.24   49.60
   6   1  -4  594.94   48.80
  -6  -1   4  548.75   47.70
  -6  -1   4  580.94   48.20
   5   1  -4  661.03   55.79
   5   1  -4  714.53   57.79
   5   1  -4  636.24   58.89
   5   1  -4  689.63   56.39
   5   1  -4  686.53   57.49
   5   1  -4  699.33   56.49
  -5  -1   4  693.43   55.69
  -5  -1   4  684.43   59.99
  -5  -1   4  680.13   55.49
   4   1  -4  432.36   37.50
   4   1  -4  403.36   38.20
  -4  -1   4  427.36   38.00
  -4  -1   4  459.55   39.10
  -4  -1   4  473.85   36.20
   3   1  -4  223.58   17.40
   3   1  -4  191.08   18.10
   3   1  -4  188.58   19.80
  -3  -1   4  148.29   17.30
  -3  -1   4  165.38   18.70
   2   1  -4  330.77   26.40
   2   1  -4  287.87   27.40
   2   1  -4  267.87   28.40
   2   1  -4  303.17   25.80
  -2  -1   4  361.86   30.30
  -2  -1   4  313.57   25.90
  -2  -1   4  298.37   26.50
   1   1  -4 2865.61  214.08
   1   1  -4 2615.04  216.18
   1   1  -4 2571.84  213.88
   1   1  -4 2743.03  214.88
  -1  -1   4 2706.93  213.78
  -1  -1   4 2740.33  213.98
  -1  -1   4 2670.13  215.48
   0   1  -4 5404.46  452.75
   0   1  -4 5847.02  453.45
   0  -1   4 5411.26  450.55
   0  -1   4 5683.33  451.85
   0  -1   4 6174.38  450.75
  -1   1  -4 2464.75  213.18
  -1   1  -4 2704.93  216.38
  -1   1  -4 2653.13  214.78
   1  -1   4 2612.54  212.68
   1  -1   4 2601.84  212.78
   1  -1   4 2988.40  214.28
   1  -1   4 2652.63  214.68
   1  -1   4 2819.92  212.68
  -2   1  -4  254.07   26.20
  -2   1  -4  349.96   27.00
  -2   1  -4  302.67   32.40
   2  -1   4  284.17   24.70
   2  -1   4  303.47   25.00
   2  -1   4  285.07   25.10
   2  -1   4  278.27   28.10
   2  -1   4  285.47   29.80
  -3   1  -4  142.59   18.90
  -3   1  -4  146.19   20.10
  -3   1  -4  176.38   20.10
   3  -1   4  199.38   18.00
   3  -1   4  203.48   18.70
   3  -1   4  200.38   20.20
   3  -1   4  242.18   18.40
  -4   1  -4  438.26   38.40
  -4   1  -4  348.17   36.90
  -4   1  -4  418.76   38.00
  -4   1  -4  467.35   34.40
   4  -1   4  416.06   37.00
   4  -1   4  415.56   38.30
  -5   1  -4  746.93   56.99
  -5   1  -4  745.83   56.89
  -5   1  -4  754.72   57.09
  -5   1  -4  713.63   56.79
  -5   1  -4  704.43   61.69
  -5   1  -4  619.94   58.69
   5  -1   4  647.14   59.69
   5  -1   4  741.03   58.09
   5  -1   4  755.22   58.69
   5  -1   4  682.83   58.29
   5  -1   4  702.13   58.49
   5  -1   4  560.94   61.59
  -6   1  -4  635.84   49.50
  -6   1  -4  601.74   49.70
  -6   1  -4  539.85   51.39
  -6   1  -4  627.04   49.60
   6  -1   4  604.94   51.19
   6  -1   4  627.84   50.99
   6  -1   4  638.04   50.29
  -7   1  -4   27.90    7.00
  -7   1  -4   24.10    6.30
  -7   1  -4   36.10    5.50
  -7   1  -4   24.30    5.30
   7  -1   4   25.10    5.20
   7  -1   4   27.40    6.20
   7   0  -4    8.30    5.90
   7   0  -4   11.30    5.10
   7   0  -4    0.20    5.90
  -7   0   4    3.70    3.50
   6   0  -4   75.39   11.70
   6   0  -4   64.89   10.90
   6   0  -4   66.29   12.50
  -6   0   4   58.09    9.80
  -6   0   4   54.69    9.10
  -6   0   4   62.09    9.70
   5   0  -4    2.10    6.50
   5   0  -4    8.10    6.60
   5   0  -4   10.20    6.10
   5   0  -4   14.90    9.70
   5   0  -4    4.90    6.90
  -5   0   4    4.80    4.70
  -5   0   4    5.70    4.90
  -5   0   4   11.50    7.20
  -5   0   4    6.80    7.30
   4   0  -4   66.99   10.80
   4   0  -4   49.00   10.10
   4   0  -4   46.30   11.20
  -4   0   4   57.99   10.50
  -4   0   4   59.19   12.00
  -4   0   4   51.89    8.00
   3   0  -4  210.38   19.60
   3   0  -4  201.68   18.70
   3   0  -4  195.48   18.80
   3   0  -4  196.88   20.80
  -3   0   4  204.08   19.90
  -3   0   4  196.38   18.80
   2   0  -4  471.25   40.90
   2   0  -4  505.95   42.40
   2   0  -4  493.05   41.10
   2   0  -4  507.85   41.30
  -2   0   4  524.35   41.00
  -2   0   4  496.95   44.60
   1   0  -4   29.10    6.40
   1   0  -4   42.30   13.90
   1   0  -4   37.40   10.00
   1   0  -4   18.70    4.40
  -1   0   4   32.20    5.30
  -1   0   4   28.80    6.10
  -1   0   4   31.50    4.80
  -1   0   4   33.70    7.90
   0   0  -4 2903.61  232.88
   0   0  -4 2837.12  228.08
   0   0   4 2878.61  227.78
  -1   0  -4   56.09   20.20
  -1   0  -4   20.80    6.20
   1   0   4   34.00    7.80
   1   0   4   33.00    6.20
   1   0   4   26.50    5.20
   1   0   4   46.80    9.20
  -2   0  -4  413.96   40.30
  -2   0  -4  531.55   47.40
  -2   0  -4  490.25   40.60
   2   0   4  496.45   39.80
   2   0   4  482.05   42.70
   2   0   4  497.85   39.10
   2   0   4  439.86   39.30
   2   0   4  466.35   39.40
   2   0   4  476.35   39.20
  -3   0  -4  217.28   21.50
  -3   0  -4  203.48   22.10
   3   0   4  193.28   19.40
   3   0   4  218.18   20.70
   3   0   4  199.48   19.60
   3   0   4  215.98   19.30
  -4   0  -4   54.19   10.80
  -4   0  -4   49.40   10.60
  -4   0  -4   53.39    6.70
  -4   0  -4   34.40    9.20
   4   0   4   51.59   10.80
   4   0   4   46.70    9.90
   4   0   4   52.29   12.80
  -5   0  -4    6.20    3.80
  -5   0  -4   -2.30    9.30
  -5   0  -4   -1.30    7.10
  -5   0  -4    6.20    4.00
   5   0   4    3.40    4.70
   5   0   4    6.40    6.70
   5   0   4    3.40    7.20
   5   0   4    5.50    7.80
   5   0   4    7.30    7.90
  -6   0  -4   68.69    8.80
  -6   0  -4   67.29    8.60
  -6   0  -4   72.39    9.00
  -6   0  -4   52.49   11.70
   6   0   4   65.69   10.70
   6   0   4   62.69    8.30
   6   0   4   59.39   11.50
   6   0   4   76.99   11.90
  -7   0  -4    9.90    6.20
  -7   0  -4    2.50    3.00
   7   0   4    6.80    5.30
   7   0   4    7.20    4.30
   7   0   4    2.20    2.30
   7  -1  -4   41.50    8.30
   7  -1  -4   29.90    7.50
  -7   1   4   37.90   10.40
  -7   1   4   21.20    5.60
  -7   1   4   30.40    5.70
   6  -1  -4  548.95   48.00
   6  -1  -4  582.64   49.20
   6  -1  -4  552.54   47.80
  -6   1   4  577.04   46.70
  -6   1   4  577.04   46.70
  -6   1   4  584.34   47.00
   5  -1  -4  627.14   56.09
   5  -1  -4  664.23   57.09
   5  -1  -4  672.53   55.99
   5  -1  -4  633.24   54.89
   5  -1  -4  651.63   54.69
   5  -1  -4  705.13   57.49
  -5   1   4  688.03   54.19
  -5   1   4  675.23   54.09
  -5   1   4  648.84   56.39
  -5   1   4  700.33   54.49
  -5   1   4  632.74   54.19
   4  -1  -4  546.15   42.50
   4  -1  -4  526.45   42.50
   4  -1  -4  526.45   43.30
  -4   1   4  495.25   43.00
  -4   1   4  439.56   41.90
  -4   1   4  466.35   40.70
   3  -1  -4  195.28   18.40
   3  -1  -4  198.48   18.60
   3  -1  -4  153.48   18.70
   3  -1  -4  158.08   20.80
  -3   1   4  213.48   18.30
  -3   1   4  240.68   19.20
   2  -1  -4  327.37   25.90
   2  -1  -4  266.57   25.70
   2  -1  -4  310.27   28.10
   2  -1  -4  308.17   25.80
  -2   1   4  300.27   25.40
  -2   1   4  298.47   26.00
   1  -1  -4 2626.94  205.88
   1  -1  -4 2632.94  204.98
   1  -1  -4 2437.86  207.08
   1  -1  -4 2501.15  204.88
  -1   1   4 2490.95  205.98
  -1   1   4 2853.01  204.78
  -1   1   4 2265.47  204.58
  -1   1   4 2885.81  204.98
   0  -1  -4 5958.50  491.75
   0  -1  -4 5382.16  490.65
   0   1   4 6845.62  488.65
   0   1   4 6543.54  488.45
  -1  -1  -4 2625.34  216.08
  -1  -1  -4 2899.21  219.78
  -1  -1  -4 2695.93  218.08
   1   1   4 2975.10  215.88
   1   1   4 2735.23  217.48
   1   1   4 2405.56  215.38
   1   1   4 2710.73  215.58
   1   1   4 2731.43  215.78
  -2  -1  -4  284.57   33.00
  -2  -1  -4  310.07   26.80
   2   1   4  270.07   25.00
   2   1   4  295.57   29.60
   2   1   4  294.37   25.40
   2   1   4  311.97   25.10
   2   1   4  277.17   24.40
   2   1   4  303.07   25.60
  -3  -1  -4  235.38   20.80
  -3  -1  -4  192.78   34.20
  -3  -1  -4  243.78   21.50
   3   1   4  150.88   18.60
   3   1   4  199.78   18.70
   3   1   4  189.08   18.90
   3   1   4  160.38   17.30
  -4  -1  -4  488.95   43.10
  -4  -1  -4  471.95   43.10
  -4  -1  -4  515.45   38.70
  -4  -1  -4  394.16   41.70
   4   1   4  456.35   41.40
   4   1   4  511.25   41.80
  -5  -1  -4  672.83   63.09
  -5  -1  -4  775.32   58.69
  -5  -1  -4  770.42   58.79
   5   1   4  716.63   58.79
   5   1   4  716.33   59.39
   5   1   4  771.52   59.99
   5   1   4  723.33   60.29
   5   1   4  637.64   61.69
  -6  -1  -4  660.63   49.70
  -6  -1  -4  531.85   49.20
  -6  -1  -4  629.24   49.40
   6   1   4  586.14   49.99
   6   1   4  587.64   49.30
   6   1   4  672.83   50.39
   6   1   4  588.24   50.79
  -7  -1  -4   29.40    6.90
  -7  -1  -4   25.30    6.60
   7   1   4   23.10    4.90
   7   1   4   37.40    8.40
   7   1   4   30.00    5.00
   7  -2  -4   40.90    8.40
   7  -2  -4   43.10    9.40
  -7   2   4   44.90    6.10
  -7   2   4   37.40    9.80
   6  -2  -4   90.79   12.60
   6  -2  -4   83.99   12.50
   6  -2  -4   86.69   13.40
   6  -2  -4   65.59   12.20
  -6   2   4   61.99   10.00
  -6   2   4   77.79    9.50
   5  -2  -4  150.28   15.70
   5  -2  -4  139.89   17.30
   5  -2  -4  135.49   18.10
   5  -2  -4  147.29   15.40
  -5   2   4  146.99   14.20
  -5   2   4  146.49   14.50
  -5   2   4  135.69   14.60
   4  -2  -4   53.59   12.90
   4  -2  -4   56.39   11.60
   4  -2  -4   68.79   11.30
  -4   2   4   57.29    8.40
  -4   2   4   57.79    8.70
  -4   2   4   72.49   11.50
  -4   2   4   64.89    9.70
   3  -2  -4  501.85   42.60
   3  -2  -4  464.45   42.80
   3  -2  -4  467.05   44.90
   3  -2  -4  524.95   42.80
   3  -2  -4  503.85   42.60
  -3   2   4  564.74   42.80
  -3   2   4  517.05   41.80
   2  -2  -4 2571.14  210.28
   2  -2  -4 2652.63  211.68
   2  -2  -4 2739.03  210.58
  -2   2   4 2630.84  209.88
   1  -2  -4 2084.39  158.78
   1  -2  -4 1789.92  157.88
   1  -2  -4 1936.21  160.38
   1  -2  -4 2057.69  157.48
  -1   2   4 2019.10  157.28
  -1   2   4 1996.20  156.88
   0  -2  -4 3339.87  270.17
   0  -2  -4 2974.20  271.97
   0   2   4 3496.55  268.87
   0   2   4 3742.23  269.17
   0   2   4 3253.27  268.97
   0   2   4 3585.74  269.27
  -1  -2  -4 2185.68  174.88
  -1  -2  -4 2189.88  171.88
  -1  -2  -4 2214.18  176.18
   1   2   4 2027.90  171.18
   1   2   4 2165.68  171.58
   1   2   4 2219.98  171.68
   1   2   4 2083.79  173.58
   1   2   4 2179.08  171.28
  -2  -2  -4 2625.04  219.48
  -2  -2  -4 2796.02  214.98
  -2  -2  -4 2492.15  216.78
   2   2   4 2920.91  214.78
   2   2   4 2607.94  217.68
   2   2   4 2895.71  213.98
   2   2   4 2530.95  213.78
  -3  -2  -4  488.15   50.69
  -3  -2  -4  541.45   43.80
   3   2   4  518.35   42.60
   3   2   4  448.96   41.40
  -4  -2  -4   68.09    7.50
  -4  -2  -4   59.79   12.00
  -4  -2  -4   61.39   12.40
   4   2   4   65.49   12.80
  -5  -2  -4  163.18   14.80
  -5  -2  -4  117.99   22.30
  -5  -2  -4  170.98   14.60
   5   2   4  154.18   15.10
   5   2   4  166.98   16.20
   5   2   4  155.28   17.20
   5   2   4  165.18   16.70
  -6  -2  -4   66.29   10.00
  -6  -2  -4   62.09    9.40
   6   2   4   88.49    9.70
   6   2   4   82.79   11.50
   6   2   4  105.39   12.90
   6   2   4  110.49   11.60
  -7  -2  -4   26.00    6.80
  -7  -2  -4   42.70    8.00
   7   2   4   54.69    8.00
   7   2   4   47.20    5.90
   7   2   4   58.39    7.20
   7  -3  -4   61.89   10.90
  -7   3   4   59.19    9.60
  -7   3   4   53.89    7.00
   6  -3  -4   -8.80    6.90
   6  -3  -4    8.50    9.50
   6  -3  -4    8.20    5.40
   6  -3  -4    2.40    5.90
  -6   3   4   -3.80    7.40
  -6   3   4    0.90    4.80
   5  -3  -4   72.19   14.80
   5  -3  -4   62.99   11.10
   5  -3  -4   61.29   11.50
   5  -3  -4   43.60    9.50
  -5   3   4   62.59   12.60
  -5   3   4   57.69    9.90
  -5   3   4   58.59    8.50
   4  -3  -4  159.78   19.50
   4  -3  -4  159.58   18.60
   4  -3  -4  197.88   22.00
  -4   3   4  181.48   18.10
   3  -3  -4   93.29   13.50
   3  -3  -4   98.69   13.00
   3  -3  -4  113.29   12.80
   3  -3  -4   89.69   13.10
   3  -3  -4  100.49   17.00
  -3   3   4  105.49   11.80
  -3   3   4  106.39   12.10
   2  -3  -4  523.65   46.00
   2  -3  -4  597.44   49.10
   2  -3  -4  595.44   46.80
  -2   3   4  545.75   46.20
  -2   3   4  638.74   46.30
  -2   3   4  488.75   45.90
   1  -3  -4  573.64   51.99
   1  -3  -4  577.54   47.10
   1  -3  -4  663.33   49.80
  -1   3   4  548.85   47.20
  -1   3   4  497.55   46.80
  -1   3   4  602.54   46.70
   0  -3  -4 1489.15  119.39
   0  -3  -4 1310.57  114.29
   0  -3  -4 1441.06  116.19
   0   3   4 1583.14  114.69
   0   3   4 1331.77  114.09
   0   3   4 1406.66  114.39
   0   3   4 1649.73  114.59
   0   3   4 1290.67  115.79
  -1  -3  -4  568.44   53.09
  -1  -3  -4  581.04   48.90
   1   3   4  608.34   48.30
   1   3   4  587.94   48.00
   1   3   4  550.94   50.59
   1   3   4  554.04   47.30
   1   3   4  620.64   47.60
  -2  -3  -4  542.45   53.69
  -2  -3  -4  574.44   56.99
   2   3   4  624.64   49.70
   2   3   4  629.34   48.70
  -3  -3  -4  149.59   26.30
  -3  -3  -4  118.69   17.70
   3   3   4  117.49   15.60
  -4  -3  -4  190.88   23.60
  -4  -3  -4  177.58   23.70
  -4  -3  -4  187.98   16.10
   4   3   4  197.88   21.90
  -5  -3  -4   62.09   13.80
  -5  -3  -4   69.49    8.20
   5   3   4   72.59   11.30
   5   3   4   56.99    8.90
   5   3   4   62.59   10.40
   5   3   4   70.09   10.40
  -6  -3  -4    3.60    3.70
  -6  -3  -4    1.60    4.40
   6   3   4    6.50    3.80
   6   3   4    9.50    5.90
   6   3   4    1.40    5.00
  -7  -3  -4   50.49    7.10
   7   3   4   63.29    6.40
   7   3   4   62.09    7.60
   7   3   4   55.79    7.90
   7  -4  -4    9.60    6.60
  -7   4   4   19.00    3.60
   6  -4  -4   39.00    7.70
   6  -4  -4   35.80   10.90
  -6   4   4   32.80    8.90
  -6   4   4   38.70    7.80
   5  -4  -4   93.89   17.20
   5  -4  -4   70.19   14.40
   5  -4  -4   98.49   12.90
   5  -4  -4  116.39   18.80
  -5   4   4  102.09   14.50
  -5   4   4   88.39   11.60
  -5   4   4   97.89   12.50
   4  -4  -4  115.89   19.30
   4  -4  -4  148.09   17.70
   4  -4  -4  160.78   16.60
  -4   4   4  104.69   13.80
  -4   4   4  109.09   16.10
   3  -4  -4  317.97   32.80
   3  -4  -4  337.57   30.00
  -3   4   4  338.87   29.00
  -3   4   4  324.27   28.60
   2  -4  -4  375.06   33.80
   2  -4  -4  366.16   30.10
  -2   4   4  317.07   28.70
  -2   4   4  321.37   30.00
  -2   4   4  344.37   29.30
   1  -4  -4 1045.90   74.79
   1  -4  -4  977.60   71.79
   1  -4  -4  876.31   77.19
  -1   4   4  739.53   71.39
  -1   4   4  823.62   70.99
   0  -4  -4  284.17   27.90
   0  -4  -4  241.08   23.60
   0  -4  -4  281.77   32.80
   0   4   4  308.77   24.30
   0   4   4  261.47   23.80
   0   4   4  261.67   24.90
   0   4   4  300.47   23.90
  -1  -4  -4  851.41   80.09
  -1  -4  -4  854.11   75.69
   1   4   4 1031.40   73.99
   1   4   4  802.42   76.69
   1   4   4  923.21   74.19
   1   4   4 1018.90   74.79
  -2  -4  -4  317.67   37.80
  -2  -4  -4  322.67   42.00
   2   4   4  381.66   31.80
   2   4   4  380.76   30.50
  -3  -4  -4  322.07   42.40
  -3  -4  -4  296.17   33.00
   3   4   4  377.46   32.00
   3   4   4  339.47   29.80
  -4  -4  -4  110.99   11.00
  -4  -4  -4  110.09   21.00
  -4  -4  -4  154.68   21.20
   4   4   4  163.98   19.20
  -5  -4  -4   99.29    9.60
  -5  -4  -4   56.79   17.60
   5   4   4  103.39   12.10
   5   4   4   89.89   10.90
   5   4   4  101.29   12.40
  -6  -4  -4   33.40    7.40
   6   4   4   53.89    7.40
   6   4   4   47.40    9.90
   6   4   4   57.29    9.00
   7   4   4   21.30    3.70
   6  -5  -4    7.20    9.60
   6  -5  -4    7.10    6.30
  -6   5   4   -0.20    4.00
   5  -5  -4   95.99   19.10
   5  -5  -4   92.89   15.00
  -5   5   4  114.89   11.90
  -5   5   4   97.89   13.50
   4  -5  -4  142.29   19.50
   4  -5  -4  137.19   16.80
  -4   5   4  155.38   14.90
  -4   5   4  119.29   17.30
  -4   5   4  144.59   14.50
   3  -5  -4  420.56   38.20
   3  -5  -4  390.96   41.80
  -3   5   4  409.16   38.10
  -3   5   4  503.55   38.20
   2  -5  -4  144.09   14.40
   2  -5  -4  137.39   21.40
  -2   5   4  135.29   16.10
  -2   5   4  103.89   13.40
  -2   5   4   81.49   11.20
   1  -5  -4  226.28   26.60
   1  -5  -4  226.68   19.90
   1  -5  -4  234.48   31.60
   1  -5  -4  208.08   21.40
  -1   5   4  250.77   20.50
  -1   5   4  240.68   22.00
  -1   5   4  235.58   20.70
   0  -5  -4   35.70    4.60
   0  -5  -4   43.60   12.90
   0  -5  -4   29.70   14.90
   0   5   4   38.00    8.70
   0   5   4   38.80    6.60
   0   5   4   28.60    7.60
   0   5   4   35.30    7.70
  -1  -5  -4  252.77   32.40
  -1  -5  -4  226.88   18.90
  -1  -5  -4  259.87   25.90
   1   5   4  234.88   21.50
   1   5   4  219.48   22.30
  -2  -5  -4  135.09   33.30
  -2  -5  -4  136.69   27.40
   2   5   4  150.18   15.90
   2   5   4  152.88   17.50
  -3  -5  -4  485.75   42.50
   3   5   4  434.16   40.40
   3   5   4  418.36   38.30
  -4  -5  -4  145.19   24.10
   4   5   4  149.29   15.20
   4   5   4  143.99   15.10
   5   5   4   86.39   11.90
   5   5   4   86.29   12.70
   5   5   4   96.99   10.40
  -6  -5  -4   -0.90    4.20
   6   5   4    5.20    3.10
   6   5   4   -2.40    5.20
   6  -6  -4    3.90    5.70
   6  -6  -4    6.80    8.20
  -6   6   4    7.30    3.40
   5  -6  -4   11.50    7.60
   5  -6  -4   10.70   10.30
  -5   6   4   15.90    7.00
  -5   6   4   24.20    5.00
   4  -6  -4   12.90    7.80
   4  -6  -4   -0.50   10.40
  -4   6   4   17.60    6.60
  -4   6   4   12.20    5.20
  -4   6   4    6.00    7.30
  -4   6   4   17.80    7.70
   3  -6  -4   28.00    8.40
  -3   6   4   30.20    8.80
   2  -6  -4   18.90    7.70
   2  -6  -4   20.10   14.00
  -2   6   4   16.50    7.70
   1  -6  -4   63.99   23.80
   1  -6  -4   36.00    7.90
   1  -6  -4   59.79   15.00
   1  -6  -4   39.00    7.00
  -1   6   4   36.90    7.90
   0  -6  -4   87.59   26.60
   0  -6  -4   87.19    8.60
   0  -6  -4   92.89   19.70
   0   6   4   89.79   11.80
   0   6   4  107.89   16.90
   0   6   4   74.79   14.00
  -1  -6  -4   55.99   14.40
  -1  -6  -4   70.09   27.10
  -1  -6  -4   46.30    5.00
   1   6   4   45.20    8.00
   1   6   4   32.10    8.90
  -2  -6  -4   42.90   20.40
  -2  -6  -4   26.70   20.40
  -2  -6  -4   15.80    2.60
   2   6   4   17.30    8.70
   2   6   4   22.20    7.60
  -3  -6  -4   36.20   11.10
   3   6   4   20.80    9.20
   3   6   4   40.40    9.20
  -4  -6  -4    0.20   11.10
   4   6   4   18.40    6.20
  -5  -6  -4   12.60    3.90
   5   6   4   19.00    6.40
   6   6   4    4.80    5.00
   6  -7  -4  126.49   12.60
   5  -7  -4    6.20    8.80
   5  -7  -4    6.40    7.00
  -5   7   4    3.50    5.70
  -5   7   4    0.60    6.30
   4  -7  -4  252.07   23.70
   4  -7  -4  199.38   25.20
   4  -7  -4  214.18   22.20
  -4   7   4  252.87   22.20
  -4   7   4  234.88   22.50
   3  -7  -4    7.90    6.60
   3  -7  -4   -2.10    9.40
  -3   7   4    9.00    7.40
  -3   7   4    8.10    6.70
  -3   7   4    8.90   12.30
  -3   7   4   12.60    6.30
  -3   7   4    5.50    8.40
   2  -7  -4  145.89   24.80
   2  -7  -4  119.49   16.30
  -2   7   4  152.18   19.20
   1  -7  -4   17.70    5.20
   1  -7  -4   18.90    4.90
   1  -7  -4   17.10    9.50
   1  -7  -4   25.40   15.90
   1  -7  -4   44.90   19.70
  -1   7   4   15.70    7.80
   0  -7  -4  154.28   13.60
   0  -7  -4  158.48   13.90
   0  -7  -4  170.58   36.50
   0  -7  -4  130.49   24.00
   0   7   4  124.29   19.80
   0   7   4  144.19   16.30
  -1  -7  -4   29.80   22.50
  -1  -7  -4    7.80   13.20
  -1  -7  -4    9.00    3.10
   1   7   4   22.10    7.30
  -2  -7  -4  165.18   13.90
  -2  -7  -4  194.28   50.69
   2   7   4  145.49   19.10
  -3  -7  -4    4.80    3.00
   3   7   4    6.40    6.70
   3   7   4    9.60    8.70
   4   7   4  265.87   23.20
   4   7   4  212.68   31.50
   5   7   4   -3.90    5.80
   5  -8  -4  113.39   16.10
   5  -8  -4   89.09   12.10
  -5   8   4  121.39   12.10
  -5   8   4  102.19   12.10
   4  -8  -4   14.60    9.70
   4  -8  -4   25.30    6.80
  -4   8   4   20.20    7.30
  -4   8   4   12.60    6.80
   3  -8  -4   38.20    7.90
   3  -8  -4   21.70   13.00
  -3   8   4   26.40    7.70
  -3   8   4   12.00    7.10
  -3   8   4   17.20    7.60
   2  -8  -4   81.39   12.10
   2  -8  -4   59.99   11.80
  -2   8   4   67.39   10.00
  -2   8   4   72.89   11.70
  -2   8   4   60.29   12.50
  -2   8   4   66.99   12.70
  -2   8   4   82.39   20.30
  -2   8   4   53.69   14.50
   1  -8  -4  106.19   12.70
   1  -8  -4   89.79   12.90
   1  -8  -4   87.89   11.20
   1  -8  -4   98.59   11.50
  -1   8   4   89.59   16.40
  -1   8   4   50.99   11.80
  -1   8   4   94.19   18.80
  -1   8   4   82.49   13.40
  -1   8   4  117.29   22.50
  -1   8   4   84.99   14.60
  -1   8   4  100.79   13.10
   0  -8  -4  584.44   49.10
   0  -8  -4  594.04   49.50
   0   8   4  601.74   51.89
   0   8   4  657.53   54.29
   0   8   4  576.24   51.89
   0   8   4  635.14   54.59
   0   8   4  573.64   53.89
   0   8   4  638.94   50.59
  -1  -8  -4   94.79    9.80
  -1  -8  -4  100.39   10.60
   1   8   4   87.39   15.40
   1   8   4  115.19   14.40
   1   8   4   96.99   24.10
   1   8   4  105.29   19.60
   1   8   4  108.99   16.60
  -2  -8  -4   67.29    7.90
   2   8   4   66.49   15.00
   2   8   4   66.19   15.40
   2   8   4   58.79   16.90
   2   8   4   60.09   10.70
  -3  -8  -4   30.40    5.70
   3   8   4   38.10    8.40
   3   8   4   33.80    9.80
   4   8   4   15.40    7.70
   4   8   4   14.70    7.10
   5   8   4  102.79   11.80
   4  -9  -4    3.30    5.10
  -4   9   4    8.70    6.10
  -4   9   4    9.60    6.40
   3  -9  -4   17.70    6.80
   3  -9  -4   24.50   11.60
  -3   9   4   13.20    7.40
  -3   9   4   18.10    7.10
  -3   9   4   10.80    7.20
   2  -9  -4   53.49   11.10
   2  -9  -4   74.99   11.20
   2  -9  -4   66.49   14.80
  -2   9   4   38.80    8.90
  -2   9   4   28.40   13.40
  -2   9   4   46.40   13.30
  -2   9   4   33.50    8.80
  -2   9   4   54.79   11.00
   1  -9  -4   16.40    6.50
   1  -9  -4   14.80    5.10
   1  -9  -4   19.10    6.80
  -1   9   4   25.90    8.80
  -1   9   4    5.40   16.70
  -1   9   4   29.00   12.00
  -1   9   4   11.10    7.80
  -1   9   4   24.00   12.50
  -1   9   4   30.00    8.00
   0  -9  -4  199.48   18.30
   0  -9  -4  203.98   18.80
   0  -9  -4  217.88   19.20
   0   9   4  203.18   23.80
   0   9   4  165.48   22.10
   0   9   4  205.18   27.80
   0   9   4  190.28   20.40
  -1  -9  -4   19.10    4.50
  -1  -9  -4   18.80    5.60
   1   9   4   37.30   13.40
   1   9   4   28.30    9.30
   1   9   4   27.30    9.70
   1   9   4   11.00    8.00
   1   9   4   18.90    9.10
  -2  -9  -4   42.60    6.40
  -2  -9  -4   61.89    8.60
   2   9   4   47.70   10.00
   2   9   4   42.70   10.00
   2   9   4   32.00    9.50
   2   9   4   44.50   14.30
   3   9   4   13.00    7.80
   3   9   4    4.40    7.50
   4   9   4   11.80    6.20
   4   9   4    4.50    6.10
   3 -10  -4   10.90    5.90
   3 -10  -4   -2.70    9.00
  -3  10   4    4.10    4.90
  -3  10   4    6.90    6.30
  -3  10   4    1.80    4.60
   2 -10  -4   15.30   11.40
   2 -10  -4    4.20    6.10
  -2  10   4    3.10    5.00
  -2  10   4   -0.30    6.80
  -2  10   4   -1.60   10.70
  -2  10   4    9.60    6.70
   1 -10  -4   -0.30    5.10
   1 -10  -4   17.00    6.10
   1 -10  -4   44.40   11.00
  -1  10   4   18.70    8.00
  -1  10   4   20.70    7.50
  -1  10   4   25.60   11.70
  -1  10   4   15.40    7.90
  -1  10   4   14.10   11.90
   0 -10  -4   19.40    5.80
   0 -10  -4   -1.50    6.30
   0 -10  -4   -2.90    4.30
   0  10   4   -4.00   11.10
   0  10   4    4.30    7.50
   0  10   4    0.50    7.70
   0  10   4    6.50   10.60
  -1 -10  -4   27.90    5.90
  -1 -10  -4   18.70    4.80
  -1 -10  -4   18.40    5.30
   1  10   4    3.80    9.60
   1  10   4   13.50    7.60
   1  10   4   15.20   12.30
   1  10   4    5.60    7.30
   1  10   4   12.70    8.20
  -2 -10  -4    5.20    4.20
   2  10   4    7.90    8.20
   2  10   4   -2.60   11.90
   2  10   4    6.80    6.90
   2  10   4    3.40    7.30
   3  10   4    8.40    6.80
   3  10   4    2.40    6.00
   2 -11  -4   -2.70    8.70
   2 -11  -4    4.20    4.60
  -2  11   4    4.30    5.70
  -2  11   4    4.30    4.70
   1 -11  -4    6.10    5.10
   1 -11  -4    4.80    4.70
   1 -11  -4   11.80   10.10
  -1  11   4    8.60    5.90
  -1  11   4    7.00    9.00
  -1  11   4    3.80    6.40
  -1  11   4    7.40    9.30
   0 -11  -4   23.80    7.00
   0  11   4    2.10    5.70
   0  11   4   12.60    9.50
   0  11   4    8.20    9.70
   0  11   4   -3.40    6.20
  -1 -11  -4    5.70    7.00
  -1 -11  -4    0.80    3.90
   1  11   4    0.50    6.50
   1  11   4    2.30    5.10
   1  11   4   11.60   10.30
   1  11   4   -0.70    5.40
   1  11   4   14.20    8.40
   2  11   4    0.80    4.70
   2  11   4    2.40    8.90
   2  11   4   -3.20    6.70
   2  11  -5   24.30    5.60
   2  11  -5   23.90   10.50
   2  11  -5   49.80   16.10
   1  11  -5    7.50   10.00
   1  11  -5   13.50    5.70
   1  11  -5    1.80    7.60
   1  11  -5   27.60   10.10
  -1 -11   5    9.70    6.50
   0  11  -5   35.00    6.70
   0  11  -5   32.30    9.10
   0  11  -5   37.50    7.50
   0 -11   5   48.40    8.30
  -1  11  -5    3.10    5.60
  -1  11  -5    8.90    7.90
  -1  11  -5    2.90    5.30
   1 -11   5    8.80    6.50
   1 -11   5    0.30    5.20
  -2  11  -5   12.20    6.80
  -2  11  -5   23.50    5.40
   2 -11   5   26.70    5.80
   3  10  -5   11.80    9.10
   3  10  -5   36.50   12.50
   3  10  -5   14.70    6.10
   2  10  -5   21.20    9.60
   2  10  -5    4.20   11.60
   2  10  -5   -1.00    9.40
   2  10  -5   -1.10    6.60
  -2 -10   5   10.60    6.10
   1  10  -5   14.60   11.40
   1  10  -5   21.10   12.20
   1  10  -5   60.19   18.50
   1  10  -5   11.60    8.80
   1  10  -5   29.90    7.80
  -1 -10   5   70.19   13.70
   0  10  -5   -4.10   10.60
   0  10  -5    9.10    8.00
   0  10  -5    0.20   10.80
   0  10  -5   -7.50    7.00
   0  10  -5    4.20   10.30
   0 -10   5   -7.90    8.60
   0 -10   5   -8.00    7.20
  -1  10  -5   32.20    7.80
  -1  10  -5   17.60   10.50
  -1  10  -5   28.50    8.20
   1 -10   5   27.00    8.40
   1 -10   5    8.80    8.30
   1 -10   5   29.70    9.70
   1 -10   5   37.40    7.30
  -2  10  -5    5.20    8.80
  -2  10  -5    9.40    6.20
   2 -10   5   -1.60    6.50
   2 -10   5    0.10    6.90
  -3  10  -5   12.60    5.10
  -3  10  -5   13.40    6.30
  -3  10  -5   11.50    7.10
   3 -10   5   18.80    6.50
   3 -10   5    7.70    5.20
   4   9  -5   46.60    9.10
   4   9  -5   15.20   12.20
   3   9  -5  172.98   25.40
   3   9  -5  145.99   20.60
   3   9  -5  143.89   17.90
   2   9  -5   56.69   17.50
   2   9  -5   54.59   10.10
   2   9  -5   59.39   15.00
   2   9  -5   63.79   10.90
   2   9  -5   59.09   13.30
  -2  -9   5   61.39    8.90
   1   9  -5   17.10   13.00
   1   9  -5   29.90   12.20
   1   9  -5   26.70    8.60
   1   9  -5   24.60    9.10
   1   9  -5   25.50   10.00
  -1  -9   5   36.20    7.70
  -1  -9   5   38.40    8.00
   0   9  -5    7.20    8.30
   0   9  -5    1.40    9.80
   0   9  -5   11.60   10.90
   0   9  -5   -4.50   12.10
   0   9  -5    1.20    7.70
   0  -9   5    8.80    6.20
   0  -9   5   -8.40    7.50
   0  -9   5    2.50    7.20
  -1   9  -5   34.60    8.50
  -1   9  -5   30.40   11.20
  -1   9  -5   43.30    8.90
   1  -9   5   32.90    7.10
   1  -9   5   26.30    9.10
   1  -9   5   33.00   13.70
   1  -9   5   17.40    7.50
  -2   9  -5   41.90   11.60
  -2   9  -5   67.99   11.80
  -2   9  -5   74.39   13.10
   2  -9   5   48.60    9.70
   2  -9   5   57.09   14.40
   2  -9   5   60.79   11.50
  -3   9  -5  102.49   17.00
  -3   9  -5  136.29   15.70
  -3   9  -5  154.48   16.20
   3  -9   5  118.29   19.40
   3  -9   5  168.28   16.10
  -4   9  -5   50.09    9.80
  -4   9  -5   46.40   10.30
   4  -9   5   54.29    8.30
   4   8  -5   -7.10    6.40
   4   8  -5   23.80   13.40
   3   8  -5   54.09   14.00
   3   8  -5   64.49   15.80
   3   8  -5   78.99   17.00
   3   8  -5  131.09   24.40
   2   8  -5   40.00   13.70
   2   8  -5   33.80    9.40
   2   8  -5   35.60   13.20
   2   8  -5   71.39   17.60
   2   8  -5   36.30    9.10
  -2  -8   5   36.50    6.80
   1   8  -5   26.80    8.70
   1   8  -5   42.00   13.70
   1   8  -5   25.10    9.60
   1   8  -5   32.80    9.20
   1   8  -5   32.80   12.40
  -1  -8   5   38.60    7.00
  -1  -8   5   41.50    9.20
   0   8  -5  540.75   54.39
   0   8  -5  597.54   50.99
   0   8  -5  616.64   53.99
   0   8  -5  648.84   50.99
   0   8  -5  570.24   52.69
   0  -8   5  615.94   50.39
   0  -8   5  637.24   50.39
  -1   8  -5   39.50    8.60
  -1   8  -5   38.40    8.80
  -1   8  -5   36.60    7.50
  -1   8  -5   55.69   11.30
   1  -8   5   33.30    8.20
   1  -8   5   26.40    6.80
   1  -8   5   25.90    8.30
   1  -8   5   32.60    7.30
   1  -8   5   40.80   13.40
  -2   8  -5   20.00    9.90
  -2   8  -5   28.50    7.80
  -2   8  -5   37.80    8.50
   2  -8   5   37.90   13.70
   2  -8   5   58.99   10.60
   2  -8   5   31.50    8.00
  -3   8  -5   76.59   13.90
  -3   8  -5   93.09   16.50
  -3   8  -5   98.39   13.10
   3  -8   5   77.79   15.50
   3  -8   5   97.99   13.00
  -4   8  -5   -3.70    6.60
  -4   8  -5    6.20    6.30
   4  -8   5   -4.60    6.10
   4  -8   5   10.30   11.60
  -5   8  -5   20.90    5.80
  -5   8  -5   13.20    5.30
  -5   8  -5   24.50    5.90
   5  -8   5   31.30    9.50
   5  -8   5   15.50    5.60
   5   7  -5    2.10    6.50
   4   7  -5   12.60    8.40
   4   7  -5    8.80   14.30
   3   7  -5   33.00    9.30
   3   7  -5   25.00    8.80
   3   7  -5   29.60   13.20
   3   7  -5   12.40   12.30
   2   7  -5   89.79   13.30
   2   7  -5   95.59   11.90
   2   7  -5  150.68   33.30
  -2  -7   5   94.99   10.60
  -2  -7   5   99.49   23.50
  -2  -7   5   80.59   13.70
   1   7  -5    8.50    7.00
  -1  -7   5    8.70    4.80
  -1  -7   5   10.20    8.20
  -1  -7   5    4.10   14.90
   0   7  -5   43.30    8.90
   0  -7   5   50.19   17.20
   0  -7   5   54.09    9.00
   0  -7   5   43.60   10.10
   0  -7   5   52.09    9.60
   0  -7   5   45.10    9.80
  -1   7  -5   11.10    8.00
  -1   7  -5   16.70    6.80
   1  -7   5    6.70   13.80
   1  -7   5    6.20    6.70
   1  -7   5   -3.00    6.30
   1  -7   5    4.30    8.60
   1  -7   5   -3.50    5.90
  -2   7  -5   92.99   17.70
  -2   7  -5   87.09   16.20
   2  -7   5   92.79   15.20
   2  -7   5   90.39   14.10
   2  -7   5  101.69   16.70
  -3   7  -5   36.60   10.40
  -3   7  -5   40.60    9.70
  -3   7  -5   31.70    8.40
   3  -7   5   39.90    7.50
   3  -7   5   23.90   13.00
  -4   7  -5    8.00    7.50
  -4   7  -5   19.90    7.10
   4  -7   5   23.30    7.00
   4  -7   5   22.40   12.20
  -5   7  -5    5.50    6.30
  -5   7  -5    9.30    6.30
   5  -7   5    8.10    6.30
   5  -7   5   -2.90   10.80
   6   6  -5   87.19    9.10
   5   6  -5   25.30    5.30
   5   6  -5   15.60    8.00
   4   6  -5   34.60    6.20
   4   6  -5   40.50   16.00
   4   6  -5   32.30    9.50
   3   6  -5  275.17   24.30
   3   6  -5  262.37   26.30
  -3  -6   5  292.07   25.90
   2   6  -5   35.00    7.60
   2   6  -5   45.40    8.10
   2   6  -5   45.30   10.60
  -2  -6   5   38.80    8.70
  -2  -6   5   32.40    6.90
  -2  -6   5   32.40    7.10
   1   6  -5  341.97   27.20
   1   6  -5  345.37   28.10
  -1  -6   5  315.17   26.20
  -1  -6   5  286.07   27.50
  -1  -6   5  290.07   28.50
   0   6  -5  401.96   33.90
   0   6  -5  377.36   34.70
   0  -6   5  399.46   39.20
   0  -6   5  383.46   33.90
   0  -6   5  398.76   32.60
   0  -6   5  402.06   34.50
  -1   6  -5  305.57   27.90
  -1   6  -5  276.07   44.40
  -1   6  -5  309.77   29.00
   1  -6   5  333.87   28.60
   1  -6   5  320.67   26.90
   1  -6   5  290.07   31.80
   1  -6   5  354.56   29.20
  -2   6  -5   20.20   19.10
  -2   6  -5   30.50    7.50
  -2   6  -5   26.80    7.00
  -2   6  -5   33.50    8.50
   2  -6   5   42.80    9.00
   2  -6   5   40.10    9.30
  -3   6  -5  285.67   27.00
  -3   6  -5  269.47   26.60
   3  -6   5  261.77   26.90
   3  -6   5  255.27   26.90
  -4   6  -5   27.00    9.60
  -4   6  -5   46.40   10.90
  -4   6  -5   53.39   11.40
   4  -6   5   46.80   11.70
   4  -6   5   36.90    8.40
   4  -6   5   50.59   11.60
  -5   6  -5   36.50    8.60
  -5   6  -5   24.70    5.00
   5  -6   5   22.60   11.90
   5  -6   5   33.10    7.50
  -6   6  -5  110.59   11.50
  -6   6  -5   77.89    8.60
   6  -6   5   68.49   10.60
   6  -6   5   89.29   10.90
   6  -6   5   82.79   13.40
   6   5  -5    9.60    4.20
   6   5  -5   16.90    6.90
   5   5  -5   64.59   10.80
   5   5  -5   66.69    9.90
   5   5  -5   58.29   11.10
  -5  -5   5   65.39   10.10
   4   5  -5   72.49   15.80
   4   5  -5   78.99   16.80
   4   5  -5   70.69   16.40
   4   5  -5   63.79    9.40
   3   5  -5  290.87   23.70
   3   5  -5  288.27   25.40
  -3  -5   5  228.48   23.60
   2   5  -5  370.36   29.80
   2   5  -5  341.77   30.20
   2   5  -5  320.57   30.90
  -2  -5   5  373.26   30.20
   1   5  -5  447.26   38.50
   1   5  -5  481.05   38.10
  -1  -5   5  476.65   39.20
  -1  -5   5  439.76   37.20
  -1  -5   5  471.35   38.60
   0   5  -5    7.10    5.20
   0   5  -5    3.60    5.50
   0   5  -5   14.40   16.10
   0  -5   5    1.20    3.50
   0  -5   5    5.40    6.10
   0  -5   5    6.00    5.20
  -1   5  -5  470.95   51.69
  -1   5  -5  466.95   39.50
  -1   5  -5  467.25   38.60
   1  -5   5  458.45   39.30
   1  -5   5  483.45   39.30
   1  -5   5  431.86   37.80
   1  -5   5  458.45   41.90
  -2   5  -5  320.77   44.70
  -2   5  -5  375.06   31.20
  -2   5  -5  344.47   31.80
  -2   5  -5  362.86   30.50
   2  -5   5  344.67   31.80
   2  -5   5  372.96   32.00
  -3   5  -5  236.98   24.90
  -3   5  -5  242.98   25.00
   3  -5   5  256.77   24.90
   3  -5   5  275.37   25.80
  -4   5  -5   70.39   16.10
  -4   5  -5   82.39    9.40
  -4   5  -5   80.79   12.70
   4  -5   5   93.29   13.00
   4  -5   5  102.79   18.90
  -5   5  -5   52.99    8.00
  -5   5  -5   62.89   11.90
   5  -5   5   67.99   13.60
   5  -5   5   85.09   12.80
  -6   5  -5   16.60    4.20
  -6   5  -5   15.00    6.40
   6  -5   5    2.70    8.40
   6  -5   5    7.40    6.80
   6  -5   5   13.90    6.00
   6   4  -5   18.50    7.80
   6   4  -5   25.20    5.20
  -6  -4   5   20.00    5.50
   5   4  -5   13.00    5.00
   5   4  -5   -1.40    7.80
   5   4  -5    9.90    8.50
  -5  -4   5    7.60    5.30
   4   4  -5   92.29   13.50
   4   4  -5   97.69   12.20
  -4  -4   5  144.29   17.10
  -4  -4   5  100.79   12.00
   3   4  -5  290.97   24.80
   3   4  -5  269.27   23.70
  -3  -4   5  255.07   23.70
   2   4  -5  530.35   41.70
   2   4  -5  475.35   41.10
   2   4  -5  530.25   41.10
  -2  -4   5  484.25   41.20
  -2  -4   5  478.95   40.80
   1   4  -5  928.81   69.49
   1   4  -5  886.21   68.79
   1   4  -5  849.02   68.49
   1   4  -5  847.92   76.19
  -1  -4   5  739.03   68.29
  -1  -4   5  882.91   68.89
   0   4  -5   38.50    8.00
   0   4  -5   47.20    7.10
   0   4  -5   44.30    8.70
   0   4  -5   36.20   15.00
   0  -4   5   48.30    8.10
   0  -4   5   56.09    8.90
   0  -4   5   49.60    6.30
  -1   4  -5  895.71   70.29
  -1   4  -5  962.90   80.09
  -1   4  -5  783.72   70.69
  -1   4  -5  834.32   70.49
   1  -4   5  902.01   70.89
   1  -4   5  799.22   69.89
   1  -4   5  951.10   70.99
  -2   4  -5  540.05   43.50
  -2   4  -5  502.45   42.70
  -2   4  -5  507.55   43.90
  -2   4  -5  514.95   54.09
   2  -4   5  541.95   43.80
   2  -4   5  473.15   42.60
   2  -4   5  551.14   44.00
  -3   4  -5  245.18   24.50
  -3   4  -5  255.07   24.90
   3  -4   5  285.97   25.40
   3  -4   5  234.98   23.50
  -4   4  -5   67.29   16.50
  -4   4  -5  103.89   15.70
   4  -4   5  105.99   16.70
   4  -4   5   84.29   19.40
  -5   4  -5    6.90    7.00
  -5   4  -5   12.00    9.40
  -5   4  -5    9.60    4.20
  -5   4  -5   17.90    8.40
   5  -4   5    2.20    6.60
   5  -4   5   15.90   10.20
  -6   4  -5   23.40    6.90
  -6   4  -5   26.20    7.30
  -6   4  -5   33.10    6.50
   6  -4   5   21.50    6.50
   6  -4   5   19.90    8.90
   6  -4   5   16.00    7.90
   7   3  -5   67.69    7.40
   7   3  -5   48.20   10.30
  -7  -3   5   60.09    7.40
   6   3  -5   53.79   11.20
   6   3  -5   63.19    9.70
   6   3  -5   58.49    9.10
  -6  -3   5   62.79    9.90
  -6  -3   5   49.30    9.90
   5   3  -5   73.19   14.50
   5   3  -5   79.29   11.20
   5   3  -5   63.69   10.40
  -5  -3   5   51.99   10.60
   4   3  -5  967.30   74.59
   4   3  -5  922.41   75.29
  -4  -3   5  916.81   74.59
  -4  -3   5  808.22   74.79
  -4  -3   5  959.00   73.19
   3   3  -5  296.07   25.00
   3   3  -5  267.17   24.00
  -3  -3   5  268.87   24.60
  -3  -3   5  274.57   24.00
   2   3  -5 1496.45  113.59
   2   3  -5 1319.47  113.79
   2   3  -5 1448.06  113.09
  -2  -3   5 1467.45  113.09
  -2  -3   5 1349.96  113.09
   1   3  -5   27.10   11.10
   1   3  -5   28.10    6.20
   1   3  -5   27.00    5.90
   1   3  -5   27.20   12.40
   1   3  -5   37.10    7.90
  -1  -3   5   49.70   11.30
  -1  -3   5   46.20    5.70
  -1  -3   5   53.79    7.10
  -1  -3   5   46.00    5.90
   0   3  -5   18.40   11.50
   0   3  -5   10.80   11.20
   0   3  -5   22.00    4.90
   0   3  -5   24.20    5.10
   0   3  -5   15.70    4.70
   0  -3   5   15.70    3.70
   0  -3   5   17.40    5.10
   0  -3   5   21.90    8.90
   0  -3   5   20.70    4.90
  -1   3  -5   59.49   20.90
  -1   3  -5   42.60   16.50
  -1   3  -5   47.10    7.80
  -1   3  -5   42.80    9.70
   1  -3   5   39.00    7.70
   1  -3   5   26.50   10.10
   1  -3   5   33.30    6.70
   1  -3   5   29.60    6.60
  -2   3  -5 1373.96  112.59
  -2   3  -5 1209.28  105.69
  -2   3  -5 1420.96  106.19
   2  -3   5 1178.18  105.49
   2  -3   5 1385.06  106.09
   2  -3   5 1334.27  105.39
  -3   3  -5  269.87   25.50
  -3   3  -5  268.17   25.50
   3  -3   5  258.87   24.30
   3  -3   5  270.27   25.40
  -4   3  -5 1015.00   76.59
  -4   3  -5  979.20   76.09
   4  -3   5  921.01   75.09
   4  -3   5  802.32   77.09
   4  -3   5  822.12   75.99
  -5   3  -5   68.99    8.30
  -5   3  -5   49.40   13.20
  -5   3  -5   59.69   12.70
  -5   3  -5   58.39   13.20
  -5   3  -5   60.99    8.30
   5  -3   5   72.39   16.60
   5  -3   5   80.19   11.70
  -6   3  -5   58.89   11.90
  -6   3  -5   86.09    8.60
  -6   3  -5   58.99   11.70
   6  -3   5   60.99   10.70
   6  -3   5   67.49   13.90
   6  -3   5   55.19   11.90
   6  -3   5   45.80   10.10
  -7   3  -5   60.59    9.10
  -7   3  -5   54.39    8.00
  -7   3  -5   83.09    7.50
   7  -3   5   59.69    8.10
   7   2  -5   10.40    5.10
   7   2  -5    6.90    5.00
   7   2  -5    7.80    3.60
  -7  -2   5    4.80    3.70
   6   2  -5   17.20    7.00
   6   2  -5   32.70    7.20
   6   2  -5   42.60   10.40
   6   2  -5   24.20    5.50
  -6  -2   5    7.50    5.40
  -6  -2   5   16.60    6.00
   5   2  -5    6.60    6.50
   5   2  -5   11.20    6.50
   5   2  -5   16.20    5.40
   5   2  -5   14.90    8.80
  -5  -2   5   14.60    5.50
  -5  -2   5    5.40    4.50
   4   2  -5  150.58   16.70
   4   2  -5  133.49   15.70
  -4  -2   5  164.68   14.00
  -4  -2   5  163.28   17.90
  -4  -2   5  151.88   16.70
   3   2  -5  189.48   17.40
   3   2  -5  198.88   18.30
  -3  -2   5  172.98   18.60
  -3  -2   5  188.68   15.90
  -3  -2   5  193.28   18.10
   2   2  -5  568.94   55.59
   2   2  -5  643.54   52.19
   2   2  -5  681.73   52.59
  -2  -2   5  571.24   52.29
  -2  -2   5  685.63   52.39
  -2  -2   5  714.73   52.09
   1   2  -5   15.80    4.50
   1   2  -5   13.70    3.30
   1   2  -5   15.40    9.90
   1   2  -5   14.90    3.70
   1   2  -5   13.90    8.30
  -1  -2   5   14.70    3.50
  -1  -2   5   12.50    7.50
  -1  -2   5   14.90    3.60
   0   2  -5  995.10   85.79
   0   2  -5 1018.70   84.59
   0   2  -5 1067.09   80.49
   0   2  -5  944.71   80.79
   0  -2   5  952.80   80.49
   0  -2   5 1046.80   80.69
   0  -2   5  995.50   82.99
   0  -2   5 1073.89   80.89
  -1   2  -5    9.60    5.50
  -1   2  -5    8.30   10.80
  -1   2  -5   11.20    9.50
   1  -2   5   10.60    4.60
   1  -2   5   11.70    3.70
   1  -2   5   15.00    6.20
   1  -2   5   14.90    4.40
   1  -2   5   19.20    9.30
   1  -2   5   11.00    3.80
  -2   2  -5  652.63   57.29
  -2   2  -5  526.95   50.29
  -2   2  -5  671.43   50.79
   2  -2   5  607.84   49.70
   2  -2   5  589.24   50.29
  -3   2  -5  197.98   32.50
  -3   2  -5  208.68   21.30
  -3   2  -5  243.38   21.90
   3  -2   5  174.58   20.00
   3  -2   5  220.28   22.30
   3  -2   5  178.98   19.40
  -4   2  -5  201.08   21.00
  -4   2  -5  163.38   20.00
  -4   2  -5  172.48   14.90
   4  -2   5  128.29   18.40
   4  -2   5  147.49   20.40
   4  -2   5  148.99   18.30
  -5   2  -5   13.50    4.30
  -5   2  -5   15.70    7.30
  -5   2  -5   12.10    4.30
  -5   2  -5   10.90   10.60
  -5   2  -5    6.10    3.90
   5  -2   5   20.90    9.30
   5  -2   5   13.40    8.20
   5  -2   5    9.40    5.70
   5  -2   5    9.40    7.40
  -6   2  -5   19.40    7.50
  -6   2  -5   24.80    6.40
  -6   2  -5   17.10    8.30
  -6   2  -5   20.30    4.80
   6  -2   5   27.90    9.10
   6  -2   5   33.70    8.20
   6  -2   5   27.30    6.10
   6  -2   5   26.80    8.10
  -7   2  -5    1.10    5.00
  -7   2  -5    7.00    5.00
  -7   2  -5    8.70    3.50
   7  -2   5    6.30    4.30
   7  -2   5    9.20    4.30
   7   1  -5   48.10    9.10
   7   1  -5   43.00    7.40
  -7  -1   5   51.09    8.30
   6   1  -5   61.99   11.80
   6   1  -5   38.50    8.90
   6   1  -5   42.80   10.70
   6   1  -5   36.50    8.20
  -6  -1   5   52.49    8.60
  -6  -1   5   39.70    9.30
  -6  -1   5   46.40    9.70
   5   1  -5  208.88   21.80
   5   1  -5  215.98   21.50
   5   1  -5  196.58   19.90
   5   1  -5  228.58   22.90
  -5  -1   5  230.28   19.70
  -5  -1   5  220.58   20.00
   4   1  -5   62.79   11.20
   4   1  -5   77.39   10.90
  -4  -1   5   68.79   10.80
  -4  -1   5   52.69   12.20
  -4  -1   5   50.59    8.20
   3   1  -5   68.89    8.70
   3   1  -5   68.49    9.80
   3   1  -5   61.79   13.20
  -3  -1   5   48.70   10.80
  -3  -1   5   43.20    6.30
  -3  -1   5   38.90    9.00
   2   1  -5 1551.84  125.89
   2   1  -5 1575.04  127.09
   2   1  -5 1580.84  125.79
   2   1  -5 1444.96  128.19
  -2  -1   5 1733.83  125.89
  -2  -1   5 1667.43  128.89
  -2  -1   5 1503.95  125.89
   1   1  -5  496.15   43.60
   1   1  -5  574.24   45.80
   1   1  -5  556.84   48.20
   1   1  -5  613.54   44.20
   1   1  -5  534.05   44.10
  -1  -1   5  561.64   44.00
  -1  -1   5  556.94   43.90
  -1  -1   5  533.65   46.20
  -1  -1   5  489.95   43.90
   0   1  -5  987.10   86.99
   0   1  -5 1088.29   88.09
   0   1  -5 1099.69   84.69
   0  -1   5 1079.49   85.29
   0  -1   5  984.80   83.39
   0  -1   5 1025.80   83.49
   0  -1   5 1081.49   83.39
  -1   1  -5  527.75   47.70
  -1   1  -5  543.35   50.39
  -1   1  -5  504.85   45.10
   1  -1   5  545.95   47.00
   1  -1   5  582.94   46.60
   1  -1   5  554.34   44.20
   1  -1   5  501.35   44.00
   1  -1   5  603.74   44.20
  -2   1  -5 1608.04  125.09
  -2   1  -5 1688.23  120.29
  -2   1  -5 1504.05  119.99
   2  -1   5 1445.66  121.89
   2  -1   5 1541.55  119.19
   2  -1   5 1488.25  122.89
   2  -1   5 1364.26  118.99
   2  -1   5 1550.14  119.39
   2  -1   5 1263.07  119.09
  -3   1  -5   34.80   14.60
  -3   1  -5   56.99   13.20
  -3   1  -5   44.90    9.40
  -3   1  -5   47.10    7.40
   3  -1   5   60.09   12.20
   3  -1   5   62.39    9.60
   3  -1   5   61.09   10.00
  -4   1  -5   45.90   10.60
  -4   1  -5   47.50   12.20
  -4   1  -5   75.69   15.30
  -4   1  -5   60.09    7.50
  -4   1  -5   58.99    7.70
   4  -1   5   70.39   14.40
   4  -1   5   77.69   11.90
   4  -1   5   75.49   12.60
  -5   1  -5  246.58   20.30
  -5   1  -5  227.58   27.50
  -5   1  -5  246.68   20.20
  -5   1  -5  238.28   20.10
  -5   1  -5  243.28   20.40
  -5   1  -5  200.88   22.60
   5  -1   5  210.08   22.30
   5  -1   5  255.57   24.60
   5  -1   5  222.18   21.90
   5  -1   5  211.68   22.30
   5  -1   5  246.88   20.90
   5  -1   5  217.48   19.90
  -6   1  -5   54.79    7.50
  -6   1  -5   43.60    7.30
  -6   1  -5   46.80    7.20
  -6   1  -5   39.10   10.80
   6  -1   5   42.90    9.20
   6  -1   5   48.40    6.60
   6  -1   5   45.50    8.70
   6  -1   5   38.00    8.80
  -7   1  -5   35.70    8.20
  -7   1  -5   42.70    8.70
  -7   1  -5   45.80    5.80
  -7   1  -5   26.60    5.10
   7  -1   5   49.60    6.90
   7  -1   5   38.40    8.20
   7   0  -5   14.10    6.10
   7   0  -5    6.10    5.00
   7   0  -5    9.60    5.80
  -7   0   5    6.40    3.50
   6   0  -5   65.99   11.80
   6   0  -5   75.99   14.40
   6   0  -5   46.10    8.70
  -6   0   5   46.30    9.00
  -6   0   5   44.70    9.10
  -6   0   5   57.89    9.60
   5   0  -5   65.89   12.60
   5   0  -5   89.69   14.60
   5   0  -5   64.79   12.40
   5   0  -5   80.59   15.10
  -5   0   5   68.79   10.50
  -5   0   5   73.59   10.70
  -5   0   5  104.49   12.00
   4   0  -5  299.47   28.80
   4   0  -5  288.27   28.60
   4   0  -5  294.87   28.00
  -4   0   5  320.17   29.20
  -4   0   5  344.97   27.20
  -4   0   5  305.37   28.10
  -4   0   5  320.27   26.60
   3   0  -5   41.80   11.70
   3   0  -5   37.70    9.00
   3   0  -5   38.00    7.60
   3   0  -5   27.10    6.10
  -3   0   5   27.20    6.00
  -3   0   5   38.60    6.70
  -3   0   5   28.00    6.90
   2   0  -5  114.39   12.00
   2   0  -5  109.39   19.30
   2   0  -5  105.49   14.50
   2   0  -5  127.09   12.30
   2   0  -5   90.39   11.60
  -2   0   5  113.09   11.70
  -2   0   5  117.79   12.40
  -2   0   5  121.19   16.80
   1   0  -5 2779.42  233.78
   1   0  -5 2837.72  236.48
   1   0  -5 2982.90  234.98
   1   0  -5 2529.15  233.68
   1   0  -5 3041.10  233.98
  -1   0   5 3093.09  233.88
  -1   0   5 3132.29  235.38
  -1   0   5 3177.88  233.78
  -1   0   5 3009.50  233.58
   0   0  -5   19.70    7.30
   0   0  -5   59.09   20.30
   0   0  -5    7.90    5.90
   0   0   5   14.80    3.20
   0   0   5   14.20    4.00
   0   0   5   16.90    5.90
   0   0   5   12.80    2.90
  -1   0  -5 3092.79  237.68
  -1   0  -5 2638.74  233.28
  -1   0  -5 2884.71  235.48
   1   0   5 2754.92  232.78
   1   0   5 3061.69  233.08
   1   0   5 2912.01  232.78
   1   0   5 3167.68  234.68
   1   0   5 2798.92  234.88
   1   0   5 3157.98  232.98
  -2   0  -5  105.79   25.30
  -2   0  -5   94.09   14.40
  -2   0  -5  114.29   15.40
   2   0   5  100.49   11.70
   2   0   5  117.39   12.90
   2   0   5   96.89   16.80
   2   0   5  105.79   12.10
   2   0   5  105.39   11.00
   2   0   5  119.69   11.80
  -3   0  -5   21.70   14.70
  -3   0  -5   27.00    8.50
  -3   0  -5   32.90    5.10
  -3   0  -5   28.10    8.70
   3   0   5   48.80   10.40
   3   0   5   31.80    6.60
   3   0   5   33.70    6.40
   3   0   5   28.10    6.80
  -4   0  -5  323.77   24.60
  -4   0  -5  313.17   30.30
  -4   0  -5  236.58   27.90
  -4   0  -5  325.37   24.80
  -4   0  -5  277.07   29.80
   4   0   5  277.67   27.30
   4   0   5  290.37   26.90
   4   0   5  279.07   28.40
  -5   0  -5   81.29    9.40
  -5   0  -5   38.30   13.90
  -5   0  -5   82.49   15.60
  -5   0  -5   78.29    9.40
  -5   0  -5   76.19    8.90
   5   0   5   80.39    9.10
   5   0   5   90.99   14.50
   5   0   5   83.29   11.00
   5   0   5   75.89   12.40
   5   0   5   78.19   12.50
  -6   0  -5   53.99    8.20
  -6   0  -5   60.29    8.30
  -6   0  -5   47.40    7.70
   6   0   5   48.80   10.80
   6   0   5   49.60   11.90
   6   0   5   52.99    7.30
   6   0   5   62.69   10.30
  -7   0  -5    5.20    5.80
  -7   0  -5    5.90    2.80
   7   0   5    8.10    4.20
   7   0   5    3.30    2.30
   7  -1  -5   58.39    9.00
   7  -1  -5   50.49   10.00
   7  -1  -5   54.99   10.00
  -7   1   5   45.50   10.60
  -7   1   5   38.90    6.30
  -7   1   5   45.80    6.20
   6  -1  -5   76.39   12.50
   6  -1  -5   81.69   15.50
   6  -1  -5   72.79   13.20
  -6   1   5   64.29    9.60
  -6   1   5   71.39    9.30
  -6   1   5   52.09    9.60
   5  -1  -5  177.28   17.80
   5  -1  -5  178.38   18.30
   5  -1  -5  187.58   21.40
   5  -1  -5  186.68   19.40
   5  -1  -5  176.68   20.30
  -5   1   5  200.18   17.50
  -5   1   5  166.98   17.50
  -5   1   5  183.28   17.10
  -5   1   5  180.58   17.20
   4  -1  -5   80.89   12.90
   4  -1  -5   88.89   13.40
   4  -1  -5   88.09   13.30
  -4   1   5   95.39   13.70
  -4   1   5   96.79   10.70
  -4   1   5  106.39   12.40
  -4   1   5   96.59   10.30
   3  -1  -5   49.70   11.70
   3  -1  -5   37.80    9.90
   3  -1  -5   63.89   10.10
   3  -1  -5   47.70    9.30
  -3   1   5   54.79    7.90
  -3   1   5   52.39   10.10
  -3   1   5   61.49    9.00
   2  -1  -5 1301.57  116.69
   2  -1  -5 1465.05  116.89
   2  -1  -5 1531.85  116.99
   2  -1  -5 1448.76  118.49
  -2   1   5 1546.55  116.99
  -2   1   5 1379.36  119.19
  -2   1   5 1561.14  116.59
   1  -1  -5  528.05   45.80
   1  -1  -5  537.05   44.10
   1  -1  -5  503.25   44.10
   1  -1  -5  507.05   48.80
  -1   1   5  533.05   45.50
  -1   1   5  630.44   44.10
  -1   1   5  591.74   43.70
  -1   1   5  506.95   43.40
   0  -1  -5  877.31   83.69
   0  -1  -5 1003.50   81.29
   0  -1  -5  985.80   84.79
   0   1   5 1144.69   80.69
   0   1   5 1102.89   80.09
   0   1   5  918.51   79.99
  -1  -1  -5  546.45   49.90
  -1  -1  -5  523.75   44.50
  -1  -1  -5  509.95   47.60
   1   1   5  569.64   43.80
   1   1   5  513.05   46.10
   1   1   5  527.65   43.40
   1   1   5  551.74   43.90
   1   1   5  538.35   45.00
   1   1   5  519.55   43.00
  -2  -1  -5 1448.76  121.69
  -2  -1  -5 1434.56  116.09
   2   1   5 1268.77  114.89
   2   1   5 1462.95  114.99
   2   1   5 1449.95  118.89
   2   1   5 1504.65  115.19
   2   1   5 1516.15  115.59
  -3  -1  -5   53.79    5.90
  -3  -1  -5   26.40   16.30
  -3  -1  -5   72.89   14.40
  -3  -1  -5   50.89   10.20
   3   1   5   46.80   10.10
   3   1   5   39.50    9.50
   3   1   5   48.10   10.20
  -4  -1  -5  107.19    9.20
  -4  -1  -5   74.89   17.80
  -4  -1  -5   97.99   10.10
  -4  -1  -5   85.59   16.80
   4   1   5   85.09   13.50
   4   1   5   61.99   13.90
  -5  -1  -5  179.98   17.70
  -5  -1  -5  202.58   17.50
  -5  -1  -5  167.58   25.30
   5   1   5  219.88   21.20
   5   1   5  219.08   19.80
   5   1   5  208.38   18.90
   5   1   5  191.98   17.90
   5   1   5  220.28   20.10
  -6  -1  -5   65.89    9.20
  -6  -1  -5   68.49    9.00
  -6  -1  -5   65.59    8.90
   6   1   5   82.49    8.80
   6   1   5   65.39   11.00
   6   1   5   73.19   11.30
   6   1   5   79.89   10.80
  -7  -1  -5   34.40    6.60
  -7  -1  -5   41.50    8.80
   7   1   5   47.40    8.10
   7   1   5   44.50    7.10
   7   1   5   48.40    5.70
   7  -2  -5   10.00    6.40
   7  -2  -5   11.40    6.70
  -7   2   5    3.90    3.10
  -7   2   5    4.00    6.30
   6  -2  -5   18.80    7.80
   6  -2  -5    8.80    7.50
   6  -2  -5   12.10    9.10
   6  -2  -5    6.80    5.60
  -6   2   5    9.30    5.10
  -6   2   5    8.50    3.90
   5  -2  -5   23.50    6.60
   5  -2  -5   19.00    8.70
   5  -2  -5   12.90    5.50
   5  -2  -5   14.30    7.60
  -5   2   5   18.20    7.20
  -5   2   5   17.20    4.80
  -5   2   5   19.90    5.50
  -5   2   5   31.30    8.10
   4  -2  -5  144.59   16.40
   4  -2  -5  141.29   15.90
   4  -2  -5  134.79   16.20
  -4   2   5  147.19   15.80
  -4   2   5  122.79   14.20
  -4   2   5  129.99   13.40
   3  -2  -5  184.38   17.30
   3  -2  -5  135.29   17.10
   3  -2  -5  171.78   21.30
   3  -2  -5  172.58   17.10
  -3   2   5  186.28   17.10
  -3   2   5  163.98   15.70
   2  -2  -5  623.14   53.29
   2  -2  -5  665.83   52.89
   2  -2  -5  638.44   52.79
   2  -2  -5  754.62   55.09
  -2   2   5  592.74   55.39
  -2   2   5  653.93   52.49
  -2   2   5  596.44   51.89
   1  -2  -5   30.60    7.10
   1  -2  -5   27.40   11.10
   1  -2  -5   34.70   15.60
   1  -2  -5   33.10    9.70
  -1   2   5   36.80    6.80
  -1   2   5   29.40    4.90
  -1   2   5   30.50    8.50
   0  -2  -5 1207.68  112.49
   0  -2  -5 1285.17  112.19
   0  -2  -5 1310.97  109.39
   0   2   5 1520.35  108.19
   0   2   5 1404.56  107.79
   0   2   5 1462.85  108.19
   0   2   5 1284.17  107.89
  -1  -2  -5   24.30   11.60
  -1  -2  -5   36.00    8.00
  -1  -2  -5   29.80   12.00
   1   2   5   26.80    8.20
   1   2   5   30.20    5.40
   1   2   5   37.80    6.20
   1   2   5   34.80    8.40
   1   2   5   30.50    6.80
   1   2   5   31.20    7.00
  -2  -2  -5  591.54   49.60
  -2  -2  -5  561.04   56.09
  -2  -2  -5  563.34   52.19
   2   2   5  605.54   47.60
   2   2   5  593.84   48.10
  -3  -2  -5  164.08   14.40
  -3  -2  -5  169.38   20.90
  -3  -2  -5  180.38   31.50
   3   2   5  182.88   18.50
  -4  -2  -5  147.49   21.10
  -4  -2  -5  136.69   20.80
  -4  -2  -5  130.19   12.30
   4   2   5  152.58   17.90
  -5  -2  -5   14.20   11.50
  -5  -2  -5   18.70    4.50
  -5  -2  -5   21.20    4.20
   5   2   5   17.60    6.20
   5   2   5   24.40    7.10
   5   2   5   17.30    5.60
   5   2   5   11.70    4.30
   5   2   5   17.50    8.30
  -6  -2  -5    7.40    3.90
  -6  -2  -5    9.50    4.10
  -6  -2  -5   13.90    4.70
   6   2   5   16.10    4.10
   6   2   5    7.40    5.30
   6   2   5   13.00    6.40
   6   2   5   11.90    5.40
  -7  -2  -5    5.50    2.90
  -7  -2  -5    4.60    4.70
   7   2   5    4.10    4.10
   7   2   5    5.50    3.80
   7   2   5    5.50    2.60
   7  -3  -5   14.50    5.40
   7  -3  -5   16.80    7.20
  -7   3   5   25.60    6.20
  -7   3   5   32.40    5.30
   6  -3  -5   80.29   12.20
   6  -3  -5   97.79   13.90
   6  -3  -5   96.79   12.80
   6  -3  -5   72.29   16.10
  -6   3   5   79.49   10.80
  -6   3   5   69.89   13.50
   5  -3  -5   27.60    6.30
   5  -3  -5   39.90   10.30
   5  -3  -5   25.20    7.80
   5  -3  -5   26.50    8.50
  -5   3   5   54.99    9.90
  -5   3   5   39.60    7.50
  -5   3   5   20.60    6.20
   4  -3  -5  968.20   80.89
   4  -3  -5  992.20   80.89
  -4   3   5  977.90   80.19
   3  -3  -5  286.67   25.60
   3  -3  -5  267.97   25.10
   3  -3  -5  286.37   29.60
   3  -3  -5  264.97   25.70
  -3   3   5  285.87   24.90
   2  -3  -5 1461.85  112.79
   2  -3  -5 1454.85  114.99
  -2   3   5 1194.78  111.89
  -2   3   5 1512.05  112.29
   1  -3  -5   56.19    8.10
   1  -3  -5   59.59   14.50
   1  -3  -5   50.19   17.30
  -1   3   5   37.20    5.20
  -1   3   5   35.10    8.30
  -1   3   5   36.20    7.30
   0  -3  -5    4.40   11.30
   0  -3  -5    9.20    8.90
   0  -3  -5   12.70    4.60
   0   3   5   10.50    4.30
   0   3   5    7.00    6.00
   0   3   5   12.10    4.70
   0   3   5    3.30    5.60
   0   3   5    6.90    4.20
   0   3   5    8.60    3.20
  -1  -3  -5   43.80   11.60
  -1  -3  -5   28.50   13.20
  -1  -3  -5   34.00   13.00
   1   3   5   47.90   13.20
   1   3   5   58.19    9.20
   1   3   5   51.99    7.90
   1   3   5   66.89    9.90
   1   3   5   38.80    9.90
  -2  -3  -5 1299.97  118.19
  -2  -3  -5 1247.08  120.69
   2   3   5 1569.74  114.89
   2   3   5 1556.14  113.69
  -3  -3  -5  313.47   37.40
  -3  -3  -5  296.17   28.90
  -3  -3  -5  247.98   22.60
   3   3   5  303.67   27.20
  -4  -3  -5 1061.89   89.79
  -4  -3  -5 1044.40   84.29
  -4  -3  -5 1070.59   89.19
   4   3   5 1064.79   88.49
  -5  -3  -5   29.90    6.30
  -5  -3  -5   30.40   12.40
  -5  -3  -5   35.70    6.80
   5   3   5   34.30    6.50
   5   3   5   23.20    6.00
   5   3   5   33.40    7.30
   5   3   5   31.40    7.40
  -6  -3  -5   71.29    9.70
   6   3   5  100.29   10.00
   6   3   5  100.19   12.60
   6   3   5  104.19   11.50
  -7  -3  -5   34.40    5.50
   7   3   5   41.60    6.10
   7   3   5   32.30    4.80
   6  -4  -5   22.60    7.00
   6  -4  -5    4.60    7.10
   6  -4  -5   24.40   10.40
  -6   4   5   22.70    5.60
  -6   4   5   32.00    8.50
   5  -4  -5   18.60    5.70
   5  -4  -5   19.80    7.80
   5  -4  -5   18.50    8.20
   5  -4  -5   27.60   10.50
  -5   4   5   12.20    5.60
  -5   4   5   16.10    6.70
   4  -4  -5  153.08   18.60
   4  -4  -5  154.88   17.60
  -4   4   5  135.69   15.70
   3  -4  -5  225.98   27.20
   3  -4  -5  232.48   23.50
  -3   4   5  252.27   22.50
  -3   4   5  254.87   22.20
   2  -4  -5  510.85   44.50
   2  -4  -5  465.45   41.00
  -2   4   5  496.85   40.20
  -2   4   5  467.75   40.50
   1  -4  -5  752.02   72.09
   1  -4  -5  855.01   69.19
   1  -4  -5  737.83   66.09
  -1   4   5  888.91   65.89
  -1   4   5  835.12   66.29
   0  -4  -5   13.40   10.20
   0  -4  -5   25.20   14.40
   0   4   5   22.20    6.90
   0   4   5   14.60    5.00
   0   4   5   22.50    5.20
   0   4   5   21.70    5.70
  -1  -4  -5  809.92   69.19
  -1  -4  -5  817.92   63.59
   1   4   5  636.74   64.69
   1   4   5  754.92   62.29
   1   4   5  797.32   61.49
   1   4   5  715.73   61.79
  -2  -4  -5  510.65   49.40
  -2  -4  -5  509.55   53.49
   2   4   5  503.25   41.70
   2   4   5  468.05   42.80
  -3  -4  -5  225.58   25.60
  -3  -4  -5  196.88   17.30
   3   4   5  243.38   23.40
  -4  -4  -5  193.68   25.50
  -4  -4  -5  167.38   14.60
  -4  -4  -5  176.08   24.20
   4   4   5  166.38   21.20
  -5  -4  -5   13.90    4.00
  -5  -4  -5    1.80   11.40
   5   4   5   19.30    6.30
   5   4   5   19.50    4.80
   5   4   5   28.80    6.10
  -6  -4  -5   25.70    6.50
   6   4   5   24.60    5.70
   6   4   5   19.10    6.20
   6   4   5   20.40    5.80
   6  -5  -5    2.40    9.70
   6  -5  -5   -5.70    6.10
  -6   5   5   -1.40    3.80
   5  -5  -5   50.59   12.50
   5  -5  -5   59.29   10.00
  -5   5   5   49.50   10.70
  -5   5   5   61.79    9.30
   4  -5  -5   94.69   16.10
   4  -5  -5   52.69   11.40
  -4   5   5   55.59    9.80
  -4   5   5   43.70    9.70
   3  -5  -5  368.96   33.60
   3  -5  -5  334.47   37.40
  -3   5   5  366.46   32.00
  -3   5   5  411.36   33.30
   2  -5  -5  383.16   37.70
   2  -5  -5  392.16   32.70
  -2   5   5  392.46   32.80
  -2   5   5  328.17   31.20
   1  -5  -5  531.45   44.70
   1  -5  -5  537.05   48.80
   1  -5  -5  522.85   53.19
   1  -5  -5  531.85   43.30
  -1   5   5  526.95   45.00
  -1   5   5  539.25   44.30
  -1   5   5  548.95   44.00
   0  -5  -5    4.20    2.20
   0  -5  -5   11.70   13.70
   0  -5  -5   -0.50   10.60
   0   5   5    5.70    5.60
   0   5   5   -1.70    4.90
   0   5   5   -0.20    4.70
   0   5   5   -2.60    6.60
  -1  -5  -5  536.75   42.00
  -1  -5  -5  519.65   46.80
  -1  -5  -5  545.85   53.59
   1   5   5  533.15   44.00
   1   5   5  550.14   45.10
   1   5   5  479.05   44.10
  -2  -5  -5  358.46   32.40
  -2  -5  -5  446.96   46.20
  -2  -5  -5  419.46   51.19
   2   5   5  429.56   35.20
   2   5   5  417.96   36.60
  -3  -5  -5  422.46   37.40
  -3  -5  -5  458.05   53.19
  -3  -5  -5  316.37   29.10
   3   5   5  348.57   34.60
   3   5   5  359.36   32.70
  -4  -5  -5   37.10   13.90
  -4  -5  -5   53.09    6.60
   4   5   5   66.59   10.90
   4   5   5   66.09   13.00
   4   5   5   72.79   10.20
  -5  -5  -5   67.29    7.50
   5   5   5   68.99   10.80
   5   5   5   61.89    8.90
  -6  -5  -5    4.10    3.10
   6   5   5    6.50    3.00
   6   5   5    5.70    5.20
   6  -6  -5   83.99   10.50
   6  -6  -5   73.79   14.00
  -6   6   5   69.89    7.70
   5  -6  -5   15.90   10.80
   5  -6  -5   22.80    8.20
  -5   6   5   25.60    7.10
  -5   6   5   11.40    4.70
   4  -6  -5   33.70   11.80
   4  -6  -5   38.50    8.90
  -4   6   5   36.90    6.90
  -4   6   5   32.80    8.60
  -4   6   5   36.50    7.60
   3  -6  -5  231.28   24.40
   3  -6  -5  250.27   29.70
  -3   6   5  260.07   26.20
  -3   6   5  250.17   25.80
   2  -6  -5   26.20    8.20
   2  -6  -5   29.20   14.40
  -2   6   5   30.20    8.10
   1  -6  -5  301.17   34.20
   1  -6  -5  275.97   28.10
   1  -6  -5  347.67   40.70
   1  -6  -5  309.47   26.70
  -1   6   5  356.66   29.30
   0  -6  -5  370.86   39.50
   0  -6  -5  417.86   32.80
   0  -6  -5  427.96   47.50
   0   6   5  400.16   36.00
   0   6   5  392.76   34.50
   0   6   5  402.66   35.20
  -1  -6  -5  392.96   45.80
  -1  -6  -5  342.57   49.80
  -1  -6  -5  354.66   28.00
  -1  -6  -5  316.57   34.40
   1   6   5  346.27   30.60
   1   6   5  328.87   31.60
  -2  -6  -5   48.90    5.10
  -2  -6  -5   46.20   23.80
  -2  -6  -5  113.09   38.20
   2   6   5   31.50    9.10
   2   6   5   23.40    9.80
  -3  -6  -5  266.57   30.10
  -3  -6  -5  253.77   20.50
   3   6   5  233.18   25.00
   3   6   5  229.18   26.70
  -4  -6  -5   39.20    5.50
  -4  -6  -5   21.80   12.70
   4   6   5   37.70    7.60
   4   6   5   54.59   11.40
  -5  -6  -5   15.60    3.20
   5   6   5   29.50    6.90
   6   6   5  111.99   12.00
   5  -7  -5    1.20    8.70
   5  -7  -5    5.00    6.80
  -5   7   5   10.20    6.50
  -5   7   5   -0.60    5.50
   4  -7  -5    3.70    7.80
   4  -7  -5    9.30    6.60
   4  -7  -5   10.50   10.30
  -4   7   5    3.80    7.00
  -4   7   5    5.20    6.40
   3  -7  -5   24.30   10.80
   3  -7  -5   38.60    7.90
  -3   7   5   34.00    8.40
  -3   7   5    5.90   11.60
  -3   7   5   23.40    7.00
  -3   7   5   29.20    9.50
  -3   7   5   27.10    7.10
   2  -7  -5   59.99   14.30
   2  -7  -5  106.99   22.00
   2  -7  -5   75.89   13.50
  -2   7   5  116.39   15.40
  -2   7   5   75.99   16.20
  -2   7   5  117.09   15.90
  -2   7   5  102.69   19.20
  -2   7   5  100.99   18.60
   1  -7  -5   79.39   31.80
   1  -7  -5   17.10    4.90
   1  -7  -5   16.80    5.30
  -1   7   5   13.00    8.40
   0  -7  -5   42.90    6.60
   0  -7  -5   64.49   23.90
   0  -7  -5   55.99   16.50
   0  -7  -5   45.60    7.30
   0   7   5   38.50   10.70
   0   7   5   44.90    8.60
  -1  -7  -5   26.30   21.00
  -1  -7  -5   26.10   24.10
  -1  -7  -5   16.30    3.50
  -1  -7  -5   16.50    4.20
  -1  -7  -5   21.90   14.30
   1   7   5   25.60    7.50
  -2  -7  -5  221.48   47.20
  -2  -7  -5  156.78   48.30
  -2  -7  -5  107.79   10.50
   2   7   5  147.19   17.70
   2   7   5   91.79   16.70
   2   7   5  116.39   20.90
  -3  -7  -5   22.50    4.80
   3   7   5   41.10    9.20
   3   7   5   30.40   10.00
   3   7   5   52.19   11.50
  -4  -7  -5    7.00    2.40
   4   7   5   10.70    6.70
   4   7   5    5.00    8.10
   5   7   5   13.10    6.50
   5  -8  -5   15.50    6.70
   5  -8  -5   22.50    5.90
  -5   8   5   13.60    5.60
  -5   8   5   14.00    5.50
   4  -8  -5    3.80    9.10
   4  -8  -5    0.00    5.90
  -4   8   5   12.70    6.80
  -4   8   5    5.80    6.50
   3  -8  -5   65.29   11.50
   3  -8  -5   55.09   11.70
  -3   8   5   44.20    8.90
  -3   8   5   57.19   11.90
  -3   8   5   50.69   11.10
   2  -8  -5   22.30    9.90
   2  -8  -5   49.20   11.00
   2  -8  -5   32.00    8.10
  -2   8   5   33.90    7.80
  -2   8   5   30.40   12.70
  -2   8   5   54.49   11.00
  -2   8   5   35.50   10.80
  -2   8   5   35.70    7.70
  -2   8   5   17.10   12.00
   1  -8  -5   44.50    8.10
   1  -8  -5   51.89    9.00
   1  -8  -5   32.70    8.20
  -1   8   5   44.00   12.00
  -1   8   5   58.69    8.70
  -1   8   5   55.19   11.00
  -1   8   5   34.00    7.60
  -1   8   5   30.80   11.80
  -1   8   5   32.20   13.00
  -1   8   5   39.00    9.70
   0  -8  -5  775.52   64.99
   0  -8  -5  897.61   65.39
   0  -8  -5  806.02   64.89
   0   8   5  759.02   65.99
   0   8   5  803.02   67.39
   0   8   5  799.42   67.39
   0   8   5  795.82   70.09
  -1  -8  -5   36.10    6.50
  -1  -8  -5   48.60    7.50
   1   8   5   35.40   13.60
   1   8   5   50.39    9.20
   1   8   5   42.10   10.30
   1   8   5   40.70   10.00
   1   8   5   43.00    9.60
  -2  -8  -5   36.70    6.40
   2   8   5   30.70    9.70
   2   8   5   28.70    9.30
   2   8   5   32.10    9.00
   2   8   5   27.80   13.30
  -3  -8  -5   55.39    7.00
   3   8   5   63.99   12.70
   3   8   5   60.69   16.10
   4   8   5    2.00    7.00
   4   8   5    2.80    6.60
   5   8   5   22.40    5.90
   4  -9  -5   45.30    8.50
  -4   9   5   32.80    7.20
  -4   9   5   52.59    9.80
   3  -9  -5  140.39   14.70
   3  -9  -5  109.69   26.50
  -3   9   5  118.49   15.10
  -3   9   5  124.89   14.40
  -3   9   5  128.99   14.60
   2  -9  -5   63.39   11.30
  -2   9   5   41.70   12.90
  -2   9   5   54.19   10.30
  -2   9   5   43.70    8.50
  -2   9   5   57.59   13.70
  -2   9   5   32.80    8.70
   1  -9  -5   42.60    7.80
   1  -9  -5   25.90    5.60
   1  -9  -5   62.29    9.80
  -1   9   5   15.90   12.70
  -1   9   5   28.10    8.50
  -1   9   5   26.30    8.00
  -1   9   5   30.80   11.80
  -1   9   5   28.10    9.00
   0  -9  -5    4.40    5.40
   0  -9  -5    2.80    4.70
   0  -9  -5    5.90    4.40
   0   9   5   17.30   12.40
   0   9   5    4.50    7.50
   0   9   5   12.30    8.50
   0   9   5   12.10    9.90
  -1  -9  -5   43.30    9.00
  -1  -9  -5   27.20    6.90
   1   9   5   38.40    9.80
   1   9   5   28.20    9.30
   1   9   5   45.70   13.80
   1   9   5   32.60    8.70
   1   9   5   53.09   10.50
  -2  -9  -5   54.79    9.10
  -2  -9  -5   56.79    7.60
   2   9   5   70.39   14.20
   2   9   5   64.09   14.50
   2   9   5   72.19   15.10
   2   9   5   49.50   14.60
   3   9   5  124.09   15.90
   3   9   5  136.99   18.30
   4   9   5   40.50    9.00
   4   9   5   36.10   11.70
   3 -10  -5   18.10    6.00
  -3  10   5   12.50    5.00
  -3  10   5    8.80    5.10
  -3  10   5   16.00    6.30
   2 -10  -5    3.70    5.90
   2 -10  -5    5.10   10.70
  -2  10   5    3.50    5.60
  -2  10   5    9.30   10.40
  -2  10   5   -9.20   10.40
  -2  10   5   10.80    7.00
  -2  10   5    3.70    6.20
   1 -10  -5   26.70    6.50
   1 -10  -5   15.00    5.40
  -1  10   5   25.60   11.80
  -1  10   5   22.90    7.40
  -1  10   5   27.20    8.00
  -1  10   5   28.90   11.50
  -1  10   5   21.20    7.70
   0 -10  -5    5.50    6.40
   0 -10  -5    4.70    7.80
   0 -10  -5   -1.40    4.20
   0  10   5    8.20   10.60
   0  10   5    5.40    7.20
   0  10   5   14.10   11.40
   0  10   5   -1.80    7.30
  -1 -10  -5   35.70    7.20
  -1 -10  -5   20.40    5.50
   1  10   5   37.70   10.20
   1  10   5   17.50    7.30
   1  10   5   21.90    8.00
   1  10   5   21.70    8.20
   1  10   5   16.40   12.00
  -2 -10  -5    2.70    4.20
   2  10   5   -2.70    6.30
   2  10   5    8.70    7.20
   2  10   5    5.10    8.00
   2  10   5    5.00   11.30
   3  10   5    5.50    6.80
   3  10   5    8.30    6.20
   2 -11  -5   29.40    6.60
   2 -11  -5   34.50    9.00
  -2  11   5   20.20    6.00
   1 -11  -5   16.10    5.00
   1 -11  -5   12.50    4.80
   1 -11  -5    8.80   10.60
  -1  11   5    1.50    8.80
  -1  11   5   13.80    5.70
  -1  11   5   18.60    9.30
   0 -11  -5   35.60    6.20
   0  11   5   48.20   10.80
   0  11   5   43.50   10.40
   0  11   5   43.30    7.10
   0  11   5   48.30   10.10
  -1 -11  -5    2.70    4.20
   1  11   5    4.70    5.00
   1  11   5   17.80    9.90
   1  11   5    0.80    5.20
   1  11   5    9.80    6.30
   1  11   5   -1.90    8.10
  -2 -11  -5   39.90    5.60
   2  11   5   22.60    8.60
   2  11   5   17.80    5.60
   2  11   5   20.00    7.20
   2  11  -6   17.30    9.00
   2  11  -6   13.50    5.50
   2  11  -6   22.60    9.60
   1  11  -6   80.69   18.50
   1  11  -6   78.59   13.10
   1  11  -6  111.89   12.40
   1  11  -6  121.89   20.70
  -1 -11   6  122.39   14.00
   0  11  -6   13.50    5.40
   0  11  -6    4.60    8.00
   0 -11   6   16.00    7.40
  -1  11  -6   84.49   13.10
  -1  11  -6  101.79   12.00
   1 -11   6  100.19   12.70
  -2  11  -6    1.50    4.80
   3  10  -6   18.80   10.10
   3  10  -6   46.90    9.00
   3  10  -6   42.60   12.10
   2  10  -6    0.90    9.40
   2  10  -6   15.60   12.00
   2  10  -6   21.90    7.10
  -2 -10   6   10.50    6.80
   1  10  -6  214.88   25.70
   1  10  -6  155.08   17.30
   1  10  -6  124.79   23.60
   1  10  -6  127.69   19.40
   1  10  -6  144.89   17.50
  -1 -10   6  136.89   18.20
  -1 -10   6  161.48   18.80
   0  10  -6   39.50   13.60
   0  10  -6   60.49   12.70
   0  10  -6   63.59   12.30
   0  10  -6   75.09   12.50
   0 -10   6   67.29   16.20
   0 -10   6   68.99   15.10
  -1  10  -6   92.49   14.90
  -1  10  -6  124.09   16.20
  -1  10  -6   97.99   17.50
   1 -10   6  162.38   15.00
   1 -10   6  172.48   18.40
  -2  10  -6   22.50    6.70
  -2  10  -6   12.50    8.60
   2 -10   6    9.30    6.30
   2 -10   6   14.00    7.00
  -3  10  -6   31.60    5.80
  -3  10  -6   40.80    6.80
   3 -10   6   54.49    9.30
   4   9  -6   15.00   11.10
   4   9  -6   16.20    5.90
   3   9  -6   18.80   13.80
   3   9  -6    7.10    7.30
   3   9  -6   -9.90    9.40
   2   9  -6  170.98   26.80
   2   9  -6  193.88   24.10
   2   9  -6  109.59   22.30
   2   9  -6  131.09   19.50
  -2  -9   6  165.48   16.70
   1   9  -6  154.58   22.50
   1   9  -6  152.68   25.40
   1   9  -6  171.78   19.60
   1   9  -6  177.58   24.20
   1   9  -6  148.19   18.90
  -1  -9   6  140.09   17.50
  -1  -9   6  165.98   17.90
   0   9  -6  644.64   60.39
   0   9  -6  747.93   58.69
   0   9  -6  644.34   67.19
   0   9  -6  682.53   62.39
   0   9  -6  720.93   58.99
   0  -9   6  701.53   58.59
   0  -9   6  754.82   58.49
   0  -9   6  711.13   58.19
  -1   9  -6  136.89   17.50
  -1   9  -6  148.19   21.40
  -1   9  -6  163.58   17.90
   1  -9   6  156.58   16.10
   1  -9   6  172.58   26.90
   1  -9   6  148.69   18.50
   1  -9   6  145.29   18.90
  -2   9  -6  164.28   17.40
  -2   9  -6  185.88   20.60
  -2   9  -6  155.58   18.30
   2  -9   6  164.98   22.90
   2  -9   6  125.89   23.20
   2  -9   6  174.08   17.60
  -3   9  -6   13.80    7.10
  -3   9  -6    4.20    6.90
   3  -9   6   11.20    7.40
   3  -9   6    7.60    8.30
  -4   9  -6   34.50    6.60
  -4   9  -6   25.70    6.50
   4  -9   6   21.50    6.70
   4  -9   6   13.30    7.20
   5   8  -6  103.59   11.80
   4   8  -6   36.70    7.90
   4   8  -6   35.60   13.80
   3   8  -6  125.59   24.60
   3   8  -6   56.29   16.60
   3   8  -6   52.09   10.20
  -3  -8   6   53.49   10.20
   2   8  -6   14.50   12.40
   2   8  -6   30.50   13.20
   2   8  -6   25.00    9.30
   2   8  -6   24.70    8.40
   2   8  -6   22.20    9.70
  -2  -8   6   32.10    7.30
   1   8  -6   57.09    9.20
   1   8  -6   19.10   12.20
   1   8  -6   19.10    8.40
   1   8  -6   22.20    9.60
   1   8  -6    9.90   11.20
  -1  -8   6   13.50    6.60
  -1  -8   6   11.20    6.20
   0   8  -6   32.00    8.70
   0   8  -6   38.70   11.00
   0   8  -6   41.30   11.80
   0  -8   6   31.10    8.20
   0  -8   6   37.60    8.20
   0  -8   6   66.79   13.40
  -1   8  -6    8.80    6.80
  -1   8  -6    9.20    7.40
  -1   8  -6   11.70    7.50
  -1   8  -6    5.30    9.70
   1  -8   6   13.90    7.20
   1  -8   6    5.90    8.20
   1  -8   6   12.20    8.10
   1  -8   6    8.70   14.00
   1  -8   6   17.10    6.50
  -2   8  -6   37.10    8.10
  -2   8  -6   47.00   11.50
  -2   8  -6   21.50    7.80
  -2   8  -6   34.80   10.90
   2  -8   6   32.00   13.10
   2  -8   6   20.70    7.90
   2  -8   6   24.90    7.20
  -3   8  -6   60.99   13.40
  -3   8  -6   69.59   12.40
  -3   8  -6   70.49   13.50
   3  -8   6   64.19   14.20
   3  -8   6   63.39   12.10
  -4   8  -6   59.19   11.70
  -4   8  -6   59.29   10.70
  -4   8  -6   38.70    8.00
   4  -8   6   44.40   12.40
   4  -8   6   53.19   10.80
  -5   8  -6   88.99   11.20
  -5   8  -6  115.59   11.70
   5  -8   6   85.29   11.40
   5  -8   6  105.19   14.30
   5   7  -6   11.20    5.10
   5   7  -6   16.70    6.90
   4   7  -6  114.09   26.00
   4   7  -6   76.99   15.60
   3   7  -6  133.99   18.80
   3   7  -6  116.39   22.30
   3   7  -6  166.18   25.40
   3   7  -6  127.79   20.20
   2   7  -6   35.10    8.70
   2   7  -6   56.89   17.00
   2   7  -6   44.60    9.80
   2   7  -6   17.00   12.60
   2   7  -6   23.10   12.10
  -2  -7   6   52.29    8.90
   1   7  -6  175.58   19.50
  -1  -7   6  176.28   20.30
  -1  -7   6  176.28   17.30
  -1  -7   6  209.88   30.60
  -1  -7   6  172.08   18.60
  -1  -7   6  200.78   17.30
   0   7  -6   -0.90    6.60
   0  -7   6   -0.20    5.90
   0  -7   6   -3.40   13.50
   0  -7   6    2.10    6.00
   0  -7   6   -4.10    5.80
   0  -7   6    4.50    7.60
  -1   7  -6  172.78   18.00
  -1   7  -6  146.99   19.50
   1  -7   6  144.69   24.50
   1  -7   6  154.28   19.30
   1  -7   6  184.38   17.80
   1  -7   6  175.58   17.60
   1  -7   6  150.98   18.10
  -2   7  -6   63.79   11.70
  -2   7  -6   38.60   10.30
  -2   7  -6   27.70   13.20
  -2   7  -6   65.29   11.90
   2  -7   6   37.40    8.60
   2  -7   6   57.29   10.40
   2  -7   6   45.90   14.10
  -3   7  -6  159.18   16.70
  -3   7  -6  148.69   16.70
  -3   7  -6  119.99   18.20
   3  -7   6  120.09   22.40
   3  -7   6  139.29   15.70
  -4   7  -6  101.89   13.50
  -4   7  -6  124.99   14.20
   4  -7   6   97.19   21.10
   4  -7   6   68.59   13.60
  -5   7  -6   22.50    6.70
  -5   7  -6   21.20    6.50
   5  -7   6    8.80    6.40
   5  -7   6   23.80   10.90
   6   6  -6   10.60    3.60
   6   6  -6    8.20    5.20
   5   6  -6   70.19   14.70
   5   6  -6   80.29    9.90
   4   6  -6    3.70    4.70
   4   6  -6    0.50   13.00
   4   6  -6   -6.90   13.90
   4   6  -6    3.70    8.40
   3   6  -6   74.29   18.40
   3   6  -6   92.09   16.10
   3   6  -6  117.19   20.40
   3   6  -6   92.39   15.70
  -3  -6   6   85.29   11.40
  -3  -6   6   81.19   14.10
   2   6  -6   54.79   10.80
   2   6  -6   61.39    9.10
  -2  -6   6   56.39    9.60
  -2  -6   6   64.99    8.30
  -2  -6   6   57.99   11.40
   1   6  -6  120.49   13.80
   1   6  -6  118.39   12.40
  -1  -6   6  103.89   13.00
  -1  -6   6  110.39   11.60
  -1  -6   6  121.39   14.60
   0   6  -6  105.79   12.90
   0  -6   6   85.39   10.70
   0  -6   6  101.09   13.30
   0  -6   6   86.49   12.20
  -1   6  -6  107.19   14.90
  -1   6  -6  110.39   13.90
  -1   6  -6   94.79   34.30
   1  -6   6  111.29   13.40
   1  -6   6  112.59   15.00
   1  -6   6  123.39   12.90
   1  -6   6  110.99   18.80
   1  -6   6  126.09   14.60
  -2   6  -6   53.89   21.60
  -2   6  -6   61.59   12.80
  -2   6  -6   59.99   10.90
   2  -6   6   67.39   12.60
   2  -6   6   67.89   13.20
  -3   6  -6   93.99   12.20
  -3   6  -6   88.79   14.40
   3  -6   6   63.69   11.80
   3  -6   6   98.89   19.90
  -4   6  -6    5.30    6.40
  -4   6  -6    7.70    7.30
  -4   6  -6    3.70    7.60
   4  -6   6   12.40    7.10
   4  -6   6   -0.40   10.80
  -5   6  -6   73.99    9.30
  -5   6  -6   91.59   12.80
   5  -6   6   90.69   12.70
   5  -6   6   94.39   19.70
  -6   6  -6    4.60    3.10
  -6   6  -6   20.60    5.80
   6  -6   6   13.40    5.00
   6  -6   6   12.40    5.40
   6  -6   6    9.00    7.30
   6   5  -6  112.39   11.40
   5   5  -6  195.98   20.80
   5   5  -6  184.08   16.20
   5   5  -6  179.18   19.70
  -5  -5   6  134.89   16.00
   4   5  -6   68.29   17.30
   4   5  -6   84.99   15.60
   4   5  -6   85.29   17.80
   4   5  -6   85.89   17.30
   4   5  -6   67.29   10.20
  -4  -5   6   93.39   11.60
   3   5  -6  555.24   50.39
   3   5  -6  586.94   49.20
  -3  -5   6  592.14   49.70
  -3  -5   6  658.83   49.80
   2   5  -6  226.88   19.20
   2   5  -6  203.38   19.80
   2   5  -6  211.88   21.10
  -2  -5   6  221.78   19.50
  -2  -5   6  191.58   19.50
  -2  -5   6  221.48   18.20
   1   5  -6  639.94   49.00
   1   5  -6  621.44   48.40
  -1  -5   6  590.14   47.80
  -1  -5   6  547.95   49.30
  -1  -5   6  568.64   48.90
   0   5  -6  631.74   63.99
   0   5  -6  669.93   52.39
   0   5  -6  605.04   51.79
   0  -5   6  648.54   52.69
   0  -5   6  616.44   51.39
   0  -5   6  661.53   52.99
  -1   5  -6  600.84   49.99
  -1   5  -6  625.44   49.40
  -1   5  -6  577.84   61.69
   1  -5   6  567.74   52.29
   1  -5   6  614.84   50.09
   1  -5   6  583.44   48.60
   1  -5   6  608.24   49.99
  -2   5  -6  189.08   36.20
  -2   5  -6  213.38   20.30
  -2   5  -6  201.48   20.60
  -2   5  -6  226.68   22.10
   2  -5   6  250.87   22.30
   2  -5   6  233.58   22.20
  -3   5  -6  668.83   51.69
  -3   5  -6  570.84   50.89
   3  -5   6  553.44   51.99
  -4   5  -6   92.19   12.90
  -4   5  -6   76.59    9.10
  -4   5  -6   64.39   16.20
   4  -5   6   94.09   19.20
   4  -5   6   77.49   11.90
  -5   5  -6  253.47   22.60
  -5   5  -6  219.88   19.70
   5  -5   6  228.48   26.50
   5  -5   6  200.28   21.70
  -6   5  -6  108.29   10.40
  -6   5  -6  112.19   12.80
   6  -5   6  122.29   12.60
   6  -5   6   92.69   15.60
   6  -5   6   73.89   11.90
   6   4  -6   24.30    5.30
   6   4  -6   23.30    7.90
  -6  -4   6   15.80    5.60
   5   4  -6   55.29   13.30
   5   4  -6   48.50   10.40
   5   4  -6   39.10    9.40
   5   4  -6   40.80    8.70
  -5  -4   6   42.80    9.40
   4   4  -6  134.29   14.00
   4   4  -6  125.99   15.60
  -4  -4   6  137.59   13.70
  -4  -4   6  124.69   12.30
   3   4  -6   70.99   10.20
   3   4  -6   91.59   12.10
  -3  -4   6   90.89   10.30
   2   4  -6   89.69   10.90
   2   4  -6   95.89   12.10
   2   4  -6  108.19   10.70
  -2  -4   6   89.49    9.40
  -2  -4   6  103.19   10.30
  -2  -4   6   94.99   11.00
   1   4  -6  701.73   54.79
   1   4  -6  743.63   55.69
   1   4  -6  710.23   54.59
   1   4  -6  624.24   62.69
  -1  -4   6  662.53   54.99
  -1  -4   6  610.64   54.39
   0   4  -6 1674.63  149.99
   0   4  -6 1696.63  143.29
   0   4  -6 1776.92  142.29
   0   4  -6 1860.91  142.69
   0  -4   6 1897.61  142.39
   0  -4   6 1848.62  142.99
   0  -4   6 1772.52  142.99
  -1   4  -6  642.44   66.49
  -1   4  -6  658.93   56.89
  -1   4  -6  664.53   57.39
   1  -4   6  748.73   57.69
   1  -4   6  720.63   56.69
   1  -4   6  759.42   57.59
  -2   4  -6  100.49   13.80
  -2   4  -6  100.89   27.80
  -2   4  -6   90.69   12.80
  -2   4  -6   90.89   11.30
   2  -4   6   82.39   11.00
   2  -4   6  103.89   12.50
   2  -4   6   91.49   13.20
  -3   4  -6   82.39   13.90
  -3   4  -6   95.29   31.80
  -3   4  -6   92.49   13.90
   3  -4   6   67.29   11.70
   3  -4   6   57.69   13.70
  -4   4  -6  106.39   17.00
  -4   4  -6  115.89   18.50
  -4   4  -6  141.69   18.80
   4  -4   6  102.09   17.30
   4  -4   6  105.89   20.50
  -5   4  -6   63.09   12.00
  -5   4  -6   57.39    8.10
  -5   4  -6   48.50   14.00
  -5   4  -6   65.29   12.40
   5  -4   6   62.89   11.70
   5  -4   6   59.89   12.30
  -6   4  -6   24.50    6.70
  -6   4  -6   31.50    9.10
  -6   4  -6   26.70    4.90
   6  -4   6   19.10    8.80
   6  -4   6   24.10    6.30
   6  -4   6   15.10    7.00
   7   3  -6   54.89    6.40
  -7  -3   6   35.70    7.50
   6   3  -6   71.09   13.00
   6   3  -6   82.89   10.00
   6   3  -6   77.09   14.40
  -6  -3   6   55.89   10.30
  -6  -3   6   65.39   10.60
   5   3  -6   95.09   13.30
   5   3  -6  100.69   16.90
   5   3  -6  116.49   17.30
   5   3  -6  102.19   20.50
  -5  -3   6  159.78   16.20
  -5  -3   6  122.09   13.80
   4   3  -6  211.78   21.00
   4   3  -6  209.88   19.90
  -4  -3   6  190.88   20.40
  -4  -3   6  217.58   18.30
  -4  -3   6  213.38   19.80
   3   3  -6   44.00    8.80
   3   3  -6   44.00    8.20
  -3  -3   6   35.80    6.60
  -3  -3   6   37.30    8.60
  -3  -3   6   51.29    7.80
   2   3  -6  291.47   29.20
   2   3  -6  316.97   28.90
  -2  -3   6  406.76   28.90
  -2  -3   6  364.46   29.00
   1   3  -6  596.74   50.89
   1   3  -6  648.14   57.79
   1   3  -6  648.84   57.09
   1   3  -6  640.64   51.79
   1   3  -6  644.04   50.99
  -1  -3   6  619.14   50.79
  -1  -3   6  579.14   50.89
  -1  -3   6  688.93   51.39
   0   3  -6  958.50   81.39
   0   3  -6 1027.40   80.99
   0   3  -6 1121.29   81.49
   0   3  -6 1005.50   88.19
   0   3  -6  996.70   86.19
   0  -3   6  983.40   81.09
   0  -3   6 1017.60   81.69
   0  -3   6 1087.99   81.59
   0  -3   6  939.31   83.99
  -1   3  -6  688.63   52.19
  -1   3  -6  664.93   60.49
  -1   3  -6  628.24   52.79
  -1   3  -6  598.14   56.99
   1  -3   6  612.54   52.69
   1  -3   6  637.94   52.09
   1  -3   6  665.33   52.49
  -2   3  -6  364.56   38.20
  -2   3  -6  311.27   27.50
   2  -3   6  263.67   27.50
   2  -3   6  310.47   26.80
  -3   3  -6   51.19    9.60
  -3   3  -6   52.39   12.40
  -3   3  -6   29.40   15.00
   3  -3   6   47.20    8.80
   3  -3   6   57.29    9.80
  -4   3  -6  246.68   24.70
  -4   3  -6  211.98   23.30
   4  -3   6  186.38   23.00
   4  -3   6  227.88   22.10
   4  -3   6  189.18   25.20
  -5   3  -6  124.29   20.60
  -5   3  -6  113.89   15.20
  -5   3  -6  103.69   16.00
  -5   3  -6  112.89   11.50
   5  -3   6  121.99   14.30
   5  -3   6  129.89   18.20
  -6   3  -6   60.39   12.10
  -6   3  -6   58.59   11.40
  -6   3  -6   87.59    8.90
   6  -3   6   84.49   14.20
   6  -3   6   66.59   11.60
  -7   3  -6   71.49    7.00
  -7   3  -6   56.69    8.10
  -7   3  -6   66.09   11.30
   7  -3   6   55.59    7.60
   7   2  -6   55.09    7.20
   7   2  -6   57.39    9.80
   7   2  -6   56.89    8.00
  -7  -2   6   50.19    8.00
   6   2  -6   17.80    7.10
   6   2  -6   26.40    5.60
   6   2  -6   21.60   10.00
   6   2  -6   27.70    7.30
  -6  -2   6   19.20    5.70
  -6  -2   6   16.50    6.20
   5   2  -6    9.90    5.50
   5   2  -6   12.00    6.70
   5   2  -6    7.50    8.70
   5   2  -6   10.80   11.80
   5   2  -6   12.00    6.70
  -5  -2   6   12.10    5.80
  -5  -2   6   14.70    5.00
   4   2  -6  269.87   24.00
   4   2  -6  254.07   23.00
  -4  -2   6  251.67   21.40
  -4  -2   6  238.88   24.30
  -4  -2   6  242.08   22.50
  -4  -2   6  240.08   23.30
   3   2  -6  508.75   38.40
   3   2  -6  507.55   38.90
  -3  -2   6  434.66   38.40
  -3  -2   6  417.76   38.70
  -3  -2   6  434.96   37.00
  -3  -2   6  455.35   38.00
   2   2  -6  264.77   20.40
   2   2  -6  236.38   24.30
   2   2  -6  256.87   20.70
   2   2  -6  245.38   26.30
  -2  -2   6  185.08   20.00
  -2  -2   6  204.08   19.80
   1   2  -6   24.00    4.40
   1   2  -6   35.20   12.00
   1   2  -6   24.10    9.30
   1   2  -6   31.50    5.60
   1   2  -6   25.30    5.00
  -1  -2   6   37.50    5.60
  -1  -2   6   42.60    6.10
  -1  -2   6   24.60    8.90
  -1  -2   6   26.70    5.50
   0   2  -6 1957.10  141.69
   0   2  -6 1629.64  135.49
   0   2  -6 1616.84  135.79
   0   2  -6 1694.03  139.49
   0  -2   6 1630.44  137.99
   0  -2   6 1753.82  135.59
   0  -2   6 1773.72  135.99
   0  -2   6 1628.34  135.69
  -1   2  -6   27.00   11.10
  -1   2  -6   28.10    6.40
  -1   2  -6   33.70   12.90
   1  -2   6   24.40    4.50
   1  -2   6   19.00    4.90
   1  -2   6   15.70    5.10
   1  -2   6   13.20    9.70
   1  -2   6   23.40    4.60
  -2   2  -6  181.78   20.90
  -2   2  -6  184.18   29.60
   2  -2   6  251.37   19.40
   2  -2   6  239.08   20.00
   2  -2   6  196.68   19.00
  -3   2  -6  421.96   47.30
  -3   2  -6  354.86   38.80
  -3   2  -6  474.45   39.50
   3  -2   6  472.45   38.70
   3  -2   6  506.15   38.40
  -4   2  -6  259.87   27.70
  -4   2  -6  239.48   26.80
  -4   2  -6  276.67   22.40
   4  -2   6  226.58   27.40
   4  -2   6  253.57   25.70
   4  -2   6  295.67   25.90
  -5   2  -6   18.10    4.40
  -5   2  -6    8.40   10.60
  -5   2  -6   17.60    7.20
  -5   2  -6   12.60    3.90
   5  -2   6   24.60    9.40
   5  -2   6    8.60    7.60
   5  -2   6   19.70    8.20
   5  -2   6   18.50    6.00
  -6   2  -6   25.70    8.60
  -6   2  -6   24.50    5.90
  -6   2  -6   36.70    6.80
  -6   2  -6   27.20    7.40
   6  -2   6   22.00    7.80
   6  -2   6   26.40    8.20
   6  -2   6   21.40    5.90
   6  -2   6   26.40    8.70
  -7   2  -6   53.59    8.50
  -7   2  -6   56.49    8.50
  -7   2  -6   65.69    7.00
   7  -2   6   53.99    7.70
   7  -2   6   60.99    7.40
   7   1  -6   26.60    6.00
   7   1  -6   34.00    6.10
  -7  -1   6   16.80    4.30
   6   1  -6   66.59   13.30
   6   1  -6   80.79   10.80
   6   1  -6   89.59   13.70
   6   1  -6   71.89   16.30
  -6  -1   6   84.59   10.60
  -6  -1   6   67.39   11.10
  -6  -1   6   93.09   11.50
   5   1  -6   40.30    7.00
   5   1  -6   29.50    7.80
   5   1  -6   32.50   10.20
   5   1  -6   40.30    7.80
  -5  -1   6   45.00    8.80
  -5  -1   6   49.40    9.50
   4   1  -6  278.87   25.50
   4   1  -6  306.87   25.20
  -4  -1   6  263.37   25.70
  -4  -1   6  248.98   24.80
  -4  -1   6  259.37   23.00
  -4  -1   6  277.97   23.30
   3   1  -6 1469.95  122.59
   3   1  -6 1492.65  122.89
   3   1  -6 1501.35  124.69
  -3  -1   6 1566.64  123.09
  -3  -1   6 1582.34  122.39
  -3  -1   6 1609.14  122.79
  -3  -1   6 1501.05  121.59
   2   1  -6  674.63   58.99
   2   1  -6  743.33   57.19
   2   1  -6  663.63   56.89
   2   1  -6  668.93   60.59
  -2  -1   6  666.83   57.09
  -2  -1   6  734.63   56.69
  -2  -1   6  748.23   57.09
  -2  -1   6  731.83   60.89
   1   1  -6  227.48   19.80
   1   1  -6  200.48   19.10
   1   1  -6  206.68   22.50
   1   1  -6  190.58   24.90
   1   1  -6  225.48   25.80
   1   1  -6  210.78   19.60
  -1  -1   6  292.67   23.40
  -1  -1   6  261.27   19.60
  -1  -1   6  269.17   19.60
   0   1  -6  476.25   44.30
   0   1  -6  476.25   39.20
   0   1  -6  406.06   36.90
   0   1  -6  467.15   43.00
   0  -1   6  492.15   37.30
   0  -1   6  444.36   37.40
   0  -1   6  473.75   37.30
   0  -1   6  464.75   39.60
  -1   1  -6  254.17   21.70
  -1   1  -6  254.37   26.10
  -1   1  -6  248.68   30.20
   1  -1   6  211.38   19.60
   1  -1   6  206.48   19.40
   1  -1   6  222.68   19.70
   1  -1   6  212.38   23.30
  -2   1  -6  737.33   56.59
  -2   1  -6  555.24   55.79
  -2   1  -6  684.43   62.99
   2  -1   6  685.23   55.09
   2  -1   6  719.43   59.69
   2  -1   6  650.33   55.09
   2  -1   6  637.44   58.29
   2  -1   6  748.23   55.19
  -3   1  -6 1709.93  129.19
  -3   1  -6 1517.15  135.19
  -3   1  -6 1633.64  128.99
  -3   1  -6 1715.73  126.49
   3  -1   6 1480.85  128.59
   3  -1   6 1539.65  128.09
   3  -1   6 1544.05  127.89
  -4   1  -6  268.47   22.60
  -4   1  -6  278.67   28.20
  -4   1  -6  206.28   25.60
  -4   1  -6  279.57   22.80
  -4   1  -6  254.07   27.60
   4  -1   6  296.17   27.50
   4  -1   6  300.97   26.30
   4  -1   6  265.67   25.60
  -5   1  -6   50.69    7.00
  -5   1  -6   52.89    7.70
  -5   1  -6   35.70   10.50
  -5   1  -6   53.99   13.70
  -5   1  -6   50.99    7.80
   5  -1   6   35.30    7.10
   5  -1   6   44.50    8.90
   5  -1   6   28.00    9.70
   5  -1   6   36.60    6.40
   5  -1   6   41.10    8.90
  -6   1  -6   77.89   12.30
  -6   1  -6   85.59    9.70
  -6   1  -6   63.49    9.00
  -6   1  -6   99.89    9.90
  -6   1  -6  102.79   14.10
   6  -1   6   76.49   12.80
   6  -1   6  101.19   15.00
   6  -1   6   83.09    8.70
   6  -1   6   71.19   12.00
  -7   1  -6   31.20    4.80
  -7   1  -6   23.90    6.10
   7  -1   6   24.30    4.80
   7  -1   6   22.00    5.00
   7   0  -6   10.50    6.00
   7   0  -6   14.70    5.10
  -7   0   6    8.40    3.30
   6   0  -6  170.98   20.60
   6   0  -6  166.28   18.10
   6   0  -6  188.78   18.90
   6   0  -6  170.48   21.20
  -6   0   6  155.88   16.60
  -6   0   6  176.48   16.80
  -6   0   6  174.88   16.40
   5   0  -6  153.78   18.70
   5   0  -6  181.98   18.10
   5   0  -6  171.48   20.00
  -5   0   6  155.58   18.80
  -5   0   6  173.78   16.70
  -5   0   6  165.18   16.10
  -5   0   6  166.68   16.40
   4   0  -6  113.99   14.40
   4   0  -6  124.79   14.50
  -4   0   6  104.89   13.50
  -4   0   6  110.59   11.90
  -4   0   6  115.89   14.80
  -4   0   6  115.79   12.30
   3   0  -6  174.18   16.70
   3   0  -6  186.48   17.60
   3   0  -6  134.09   16.60
   3   0  -6  148.59   19.80
  -3   0   6  191.28   17.50
  -3   0   6  179.08   16.60
  -3   0   6  171.28   15.10
   2   0  -6  283.57   25.30
   2   0  -6  319.97   26.20
   2   0  -6  287.27   25.70
   2   0  -6  277.07   30.50
   2   0  -6  311.07   28.20
  -2   0   6  317.67   24.90
  -2   0   6  280.97   29.10
  -2   0   6  310.27   25.40
  -2   0   6  293.57   25.80
   1   0  -6   46.90   16.80
   1   0  -6   53.49   12.00
   1   0  -6   33.90    6.10
   1   0  -6   25.80   11.20
   1   0  -6   50.09    7.40
   1   0  -6   47.90    8.30
  -1   0   6   45.10    6.20
  -1   0   6   57.99   11.10
  -1   0   6   57.19    7.00
  -1   0   6   58.39    5.80
   0   0  -6  418.76   42.10
   0   0  -6  415.66   40.50
   0   0  -6  414.46   36.20
   0   0   6  405.56   34.10
   0   0   6  457.25   34.50
   0   0   6  395.06   34.10
   0   0   6  428.06   35.90
   0   0   6  444.26   34.30
  -1   0  -6   46.40   13.10
  -1   0  -6   53.99   11.00
  -1   0  -6   60.39   23.50
   1   0   6   47.90    9.40
   1   0   6   34.40    6.50
   1   0   6   48.30    8.50
   1   0   6   39.70    6.00
   1   0   6   30.20    8.80
   1   0   6   45.00    7.50
   1   0   6   37.80    6.90
  -2   0  -6  286.77   27.20
  -2   0  -6  292.17   27.80
  -2   0  -6  354.36   38.60
   2   0   6  290.27   24.80
   2   0   6  282.97   25.10
   2   0   6  298.47   25.50
   2   0   6  301.27   25.80
   2   0   6  262.27   29.50
   2   0   6  280.67   29.80
   2   0   6  271.67   25.20
  -3   0  -6  180.48   14.40
  -3   0  -6  162.88   19.70
  -3   0  -6  113.59   30.40
  -3   0  -6  187.68   20.80
   3   0   6  136.09   17.50
   3   0   6  169.58   17.00
   3   0   6  192.78   17.40
   3   0   6  161.78   16.40
  -4   0  -6   98.29   16.50
  -4   0  -6  124.49   11.50
  -4   0  -6  131.49   11.40
  -4   0  -6  119.39   19.10
  -4   0  -6  107.79   19.20
   4   0   6  110.49   16.90
   4   0   6  115.59   15.90
  -5   0  -6  176.88   16.70
  -5   0  -6  185.58   16.40
  -5   0  -6  173.38   16.30
  -5   0  -6  199.18   16.90
  -5   0  -6  222.88   27.00
   5   0   6  186.18   17.80
   5   0   6  164.98   18.50
   5   0   6  209.38   20.90
   5   0   6  165.48   18.70
   5   0   6  189.38   16.50
  -6   0  -6  160.28   16.50
  -6   0  -6  181.88   16.60
  -6   0  -6  158.88   16.70
  -6   0  -6  231.58   17.40
   6   0   6  199.08   18.30
   6   0   6  188.08   18.30
   6   0   6  191.78   18.50
   6   0   6  210.58   20.40
   6   0   6  173.28   16.20
  -7   0  -6    5.40    2.40
  -7   0  -6    6.20    5.40
   7   0   6    8.70    2.40
   7   0   6   14.00    4.90
   7   0   6   11.30    3.90
   7  -1  -6   15.50    6.70
   7  -1  -6   19.30    6.50
   7  -1  -6   25.60    5.30
  -7   1   6   19.20    4.90
  -7   1   6   22.20    7.10
  -7   1   6   31.50    5.60
   6  -1  -6   84.79   15.10
   6  -1  -6  115.69   14.40
   6  -1  -6  109.39   16.60
  -6   1   6   84.19   11.40
  -6   1   6  100.89   11.40
  -6   1   6   97.59   11.00
   5  -1  -6   30.20    9.10
   5  -1  -6   50.49   10.20
   5  -1  -6   28.00    7.90
   5  -1  -6   24.30    9.40
   5  -1  -6   36.30    6.70
  -5   1   6   12.30    5.00
  -5   1   6   27.20    6.00
  -5   1   6   34.10    7.80
  -5   1   6   19.80    5.80
  -5   1   6   27.30    5.90
   4  -1  -6  236.08   24.80
   4  -1  -6  218.88   24.80
   4  -1  -6  235.98   24.90
  -4   1   6  287.97   22.90
  -4   1   6  282.57   24.20
  -4   1   6  264.47   23.00
  -4   1   6  298.97   25.40
   3  -1  -6 1515.65  126.59
   3  -1  -6 1650.93  128.89
   3  -1  -6 1593.24  126.59
   3  -1  -6 1640.64  126.89
  -3   1   6 1600.14  126.29
  -3   1   6 1617.04  126.79
  -3   1   6 1446.46  125.59
   2  -1  -6  711.63   59.69
   2  -1  -6  636.14   57.19
   2  -1  -6  688.33   57.49
  -2   1   6  667.83   56.49
  -2   1   6  673.93   59.79
  -2   1   6  798.12   57.49
  -2   1   6  751.82   56.99
   1  -1  -6  271.77   21.80
   1  -1  -6  282.57   21.90
   1  -1  -6  280.47   25.10
   1  -1  -6  242.88   30.10
  -1   1   6  229.58   20.80
  -1   1   6  253.77   21.70
  -1   1   6  244.88   21.10
  -1   1   6  243.28   23.40
   0  -1  -6  452.05   39.80
   0  -1  -6  425.46   45.00
   0  -1  -6  425.96   44.20
   0   1   6  495.95   37.90
   0   1   6  534.55   38.30
   0   1   6  422.06   37.50
   0   1   6  503.45   38.80
  -1  -1  -6  225.28   33.00
  -1  -1  -6  229.88   24.60
  -1  -1  -6  216.68   29.60
   1   1   6  292.77   23.90
   1   1   6  257.57   22.90
   1   1   6  289.57   22.30
   1   1   6  254.07   26.30
   1   1   6  319.57   23.60
   1   1   6  276.37   25.10
  -2  -1  -6  626.44   64.79
  -2  -1  -6  637.74   66.19
  -2  -1  -6  730.53   56.79
   2   1   6  688.33   55.49
   2   1   6  679.83   54.79
   2   1   6  664.23   61.89
   2   1   6  674.43   55.09
  -3  -1  -6 1489.95  124.69
  -3  -1  -6 1517.25  124.89
  -3  -1  -6 1390.26  131.99
  -3  -1  -6 1484.65  121.79
   3   1   6 1623.14  124.19
   3   1   6 1709.13  123.59
  -4  -1  -6  238.68   29.70
  -4  -1  -6  305.77   30.30
  -4  -1  -6  285.47   23.30
  -4  -1  -6  304.67   23.10
   4   1   6  230.88   26.30
  -5  -1  -6   27.20    5.30
  -5  -1  -6   23.00    4.80
  -5  -1  -6   29.90   12.50
   5   1   6   39.90    7.40
   5   1   6   51.39   12.50
   5   1   6   37.80    6.80
   5   1   6   40.20    6.70
   5   1   6   33.80    8.10
  -6  -1  -6   93.29   10.60
  -6  -1  -6   89.89   10.40
  -6  -1  -6  105.89   11.00
   6   1   6  107.19   10.40
   6   1   6   91.19   13.20
   6   1   6  112.29   12.40
  -7  -1  -6   20.70    5.30
  -7  -1  -6   20.30    5.80
   7   1   6   27.20    5.90
   7   1   6   25.70    5.50
   7   1   6   21.50    4.30
   7  -2  -6   51.19    9.50
   7  -2  -6   34.50    7.50
  -7   2   6   68.49    9.80
  -7   2   6   49.70    6.30
   6  -2  -6   33.70    6.60
   6  -2  -6   28.90    9.80
   6  -2  -6   30.10    8.50
  -6   2   6   20.50    5.70
  -6   2   6   13.80    4.10
   5  -2  -6   18.50    8.70
   5  -2  -6    7.50    5.30
   5  -2  -6   13.10    7.70
   5  -2  -6    9.10    6.50
  -5   2   6   17.20    6.90
  -5   2   6    3.20    5.00
  -5   2   6    4.60    4.30
  -5   2   6    6.90    4.80
   4  -2  -6  270.97   26.90
   4  -2  -6  266.77   27.00
  -4   2   6  300.27   24.80
  -4   2   6  305.07   26.80
  -4   2   6  276.67   25.30
   3  -2  -6  424.86   41.10
   3  -2  -6  387.56   37.60
   3  -2  -6  420.76   37.80
  -3   2   6  495.45   37.70
  -3   2   6  465.35   36.70
   2  -2  -6  237.98   27.10
   2  -2  -6  241.88   23.50
   2  -2  -6  236.78   23.70
  -2   2   6  317.57   22.50
   1  -2  -6   19.30   11.20
   1  -2  -6   28.00    5.40
   1  -2  -6   48.00   21.10
   1  -2  -6   34.90   10.00
  -1   2   6   24.20    4.90
  -1   2   6   20.20    4.70
   0  -2  -6 1385.26  127.39
   0  -2  -6 1499.95  124.29
   0  -2  -6 1520.75  128.29
   0   2   6 1665.23  122.99
   0   2   6 1535.45  122.99
   0   2   6 1642.64  122.69
  -1  -2  -6   18.40   12.60
  -1  -2  -6   23.80    8.20
  -1  -2  -6   21.20   12.50
   1   2   6   30.00    6.70
   1   2   6   25.90    5.10
   1   2   6   14.30    7.70
   1   2   6   22.20    4.10
   1   2   6   24.60    6.60
  -2  -2  -6  264.37   34.70
  -2  -2  -6  290.87   29.30
   2   2   6  225.78   23.00
   2   2   6  226.18   22.10
   2   2   6  271.27   24.00
  -3  -2  -6  383.16   49.99
  -3  -2  -6  463.65   39.90
  -3  -2  -6  430.96   34.70
   3   2   6  428.76   36.80
   3   2   6  445.26   38.30
  -4  -2  -6  271.17   31.60
  -4  -2  -6  282.87   24.70
  -4  -2  -6  333.87   32.30
  -4  -2  -6  315.27   24.60
   4   2   6  289.97   29.20
  -5  -2  -6   13.30    4.20
  -5  -2  -6   -5.30   11.60
  -5  -2  -6   13.20    3.90
   5   2   6   10.30    5.30
   5   2   6    9.50    4.10
   5   2   6   11.50    6.20
   5   2   6   13.50    5.80
   5   2   6   10.30    7.80
  -6  -2  -6   23.20    4.90
  -6  -2  -6   18.30    4.20
  -6  -2  -6   14.90    4.20
   6   2   6   36.70    6.20
   6   2   6   22.20    5.80
   6   2   6   28.10    6.50
  -7  -2  -6   39.90    6.50
  -7  -2  -6   41.50    7.60
   7   2   6   60.49    6.90
   7   2   6   49.30    7.50
   7   2   6   60.69    5.90
   7  -3  -6   41.60    8.00
  -7   3   6   52.39    6.20
   6  -3  -6   91.69   12.20
   6  -3  -6   66.79   13.90
   6  -3  -6   82.69   11.80
   6  -3  -6   56.09   12.20
  -6   3   6   71.09   13.10
  -6   3   6   77.49    9.90
   5  -3  -6  104.39   15.90
   5  -3  -6  102.99   13.40
   5  -3  -6  104.99   14.70
   5  -3  -6  118.99   18.00
  -5   3   6   82.09   13.00
  -5   3   6  102.69   10.80
  -5   3   6   81.59   11.90
   4  -3  -6  293.47   27.90
   4  -3  -6  307.47   27.70
  -4   3   6  269.97   26.30
   3  -3  -6   65.29   11.00
   3  -3  -6   56.69   11.50
   3  -3  -6   63.89   17.90
  -3   3   6   59.49    9.70
   2  -3  -6  415.46   33.30
  -2   3   6  280.17   27.50
  -2   3   6  274.27   28.30
  -2   3   6  382.26   28.30
   1  -3  -6  626.64   57.99
   1  -3  -6  627.24   51.29
   1  -3  -6  680.93   57.89
   1  -3  -6  688.13   54.29
  -1   3   6  541.85   50.99
  -1   3   6  620.54   50.49
  -1   3   6  642.44   51.49
   0  -3  -6 1235.38  103.49
   0  -3  -6 1148.99  103.89
   0  -3  -6 1184.98   99.39
   0   3   6 1336.97   97.59
   0   3   6 1127.69   97.79
   0   3   6 1176.48   97.29
   0   3   6 1178.08   96.99
   0   3   6 1345.97   97.69
  -1  -3  -6  700.83   61.69
  -1  -3  -6  664.53   58.99
  -1  -3  -6  682.83   53.69
   1   3   6  547.15   55.29
   1   3   6  631.94   52.89
   1   3   6  575.94   52.49
   1   3   6  631.14   51.99
   1   3   6  679.73   52.29
  -2  -3  -6  321.57   36.40
  -2  -3  -6  358.06   32.20
  -2  -3  -6  295.37   41.00
   2   3   6  390.16   30.10
  -3  -3  -6  109.49   27.10
  -3  -3  -6   84.09   17.90
  -3  -3  -6   57.69    6.60
   3   3   6   63.89   13.60
  -4  -3  -6  314.87   33.80
  -4  -3  -6  311.87   33.10
  -4  -3  -6  296.77   25.10
   4   3   6  309.27   30.60
  -5  -3  -6   81.39   17.40
  -5  -3  -6   88.99   10.60
  -5  -3  -6  100.09   11.20
   5   3   6  123.69   13.00
   5   3   6  112.89   11.40
   5   3   6  120.49   15.40
   5   3   6  125.89   13.20
  -6  -3  -6   81.59    9.40
   6   3   6   85.69    9.50
   6   3   6   86.19   12.10
   6   3   6   90.79   11.10
  -7  -3  -6   47.70    6.60
   7   3   6   69.09    6.30
   7   3   6   76.79    7.70
   6  -4  -6   29.20    7.20
   6  -4  -6   17.20    7.60
   6  -4  -6   21.20   10.20
  -6   4   6   31.40    5.70
  -6   4   6   12.90    6.10
   5  -4  -6   49.80   10.30
   5  -4  -6   47.10    9.10
   5  -4  -6   35.70   11.70
   5  -4  -6   43.10    9.70
  -5   4   6   41.40    9.30
  -5   4   6   37.50    7.90
   4  -4  -6  144.29   19.50
   4  -4  -6  149.79   18.70
   4  -4  -6  174.58   29.90
  -4   4   6  162.88   16.80
  -4   4   6  173.28   18.30
   3  -4  -6   98.49   13.50
   3  -4  -6   88.19   13.90
   3  -4  -6  115.29   19.80
  -3   4   6   72.39   10.80
   2  -4  -6  108.19   19.90
   2  -4  -6  111.39   13.70
  -2   4   6  115.39   13.60
  -2   4   6  120.89   12.60
   1  -4  -6  671.83   62.79
   1  -4  -6  674.23   58.99
   1  -4  -6  611.04   62.39
   1  -4  -6  632.04   55.29
  -1   4   6  792.82   55.29
  -1   4   6  670.03   55.69
   0  -4  -6 1768.02  140.99
   0  -4  -6 1588.34  136.19
   0  -4  -6 1598.64  141.69
   0   4   6 1826.02  134.19
   0   4   6 1531.05  134.39
   0   4   6 1815.82  134.39
   0   4   6 1616.24  133.79
  -1  -4  -6  749.03   66.09
  -1  -4  -6  723.03   56.29
  -1  -4  -6  756.42   68.89
  -1  -4  -6  705.23   59.69
   1   4   6  666.43   57.69
   1   4   6  644.64   58.09
   1   4   6  713.33   58.69
  -2  -4  -6  144.49   24.90
  -2  -4  -6  120.39   29.40
  -2  -4  -6  120.89   10.60
   2   4   6  114.19   15.90
   2   4   6  119.79   14.80
  -3  -4  -6   80.89    8.20
  -3  -4  -6  146.99   30.00
  -3  -4  -6   86.49   19.90
   3   4   6   92.59   16.10
  -4  -4  -6  202.38   27.80
  -4  -4  -6  181.98   15.60
  -4  -4  -6  184.58   25.90
   4   4   6  171.08   22.20
  -5  -4  -6   36.50    7.10
  -5  -4  -6   23.60   22.90
  -5  -4  -6   46.60    7.90
   5   4   6   68.79   13.30
   5   4   6   64.19    9.90
   5   4   6   68.49   11.10
   5   4   6   60.89    8.30
  -6  -4  -6   23.70    6.30
   6   4   6   36.20    6.10
   6   4   6   35.30    8.10
   6  -5  -6   70.59   15.50
   6  -5  -6  102.39   11.80
  -6   5   6   70.09   10.10
  -6   5   6   89.69    9.40
   5  -5  -6  192.28   25.00
   5  -5  -6  231.38   21.60
  -5   5   6  197.78   19.80
  -5   5   6  199.48   18.90
   4  -5  -6   90.49   17.20
   4  -5  -6   63.99   12.50
  -4   5   6   75.89   11.40
  -4   5   6   75.69   10.60
   3  -5  -6  655.13   53.79
   3  -5  -6  587.74   57.29
   3  -5  -6  679.33   53.89
  -3   5   6  605.34   53.19
   2  -5  -6  231.08   22.70
   2  -5  -6  213.08   28.40
  -2   5   6  247.68   21.40
  -2   5   6  240.18   23.00
   1  -5  -6  600.34   48.10
   1  -5  -6  591.34   57.99
   1  -5  -6  576.24   53.59
   1  -5  -6  489.45   49.50
  -1   5   6  597.04   49.90
  -1   5   6  650.83   49.40
  -1   5   6  639.44   48.90
   0  -5  -6  698.33   65.29
   0  -5  -6  664.23   59.09
   0  -5  -6  673.63   67.69
   0  -5  -6  677.83   54.29
   0   5   6  714.53   56.39
   0   5   6  692.03   55.49
   0   5   6  651.23   55.69
   0   5   6  661.03   56.69
  -1  -5  -6  639.34   64.79
  -1  -5  -6  640.94   60.99
  -1  -5  -6  587.54   53.59
  -1  -5  -6  647.74   49.20
   1   5   6  568.04   51.29
   1   5   6  610.04   51.09
   1   5   6  625.44   52.19
  -2  -5  -6  289.87   37.00
  -2  -5  -6  252.57   21.30
  -2  -5  -6  274.87   42.70
   2   5   6  254.67   24.60
   2   5   6  252.37   26.00
  -3  -5  -6  693.43   72.49
  -3  -5  -6  647.94   60.39
  -3  -5  -6  678.43   53.89
   3   5   6  674.53   58.89
  -4  -5  -6   92.29    8.80
  -4  -5  -6   50.99   17.00
   4   5   6   96.99   14.70
   4   5   6   91.29   11.80
  -5  -5  -6  195.38   19.50
   5   5   6  277.87   21.90
   5   5   6  251.57   23.00
   5   5   6  235.08   20.20
  -6  -5  -6   61.99    8.70
   6   5   6  109.39   10.50
   6   5   6   85.59    7.90
   6  -6  -6    3.90    5.30
   6  -6  -6    9.50    8.30
  -6   6   6    6.80    4.10
  -6   6   6    8.40    3.00
   5  -6  -6   58.29   13.00
   5  -6  -6   67.09   12.40
  -5   6   6   68.19   11.20
  -5   6   6   69.09    8.80
   4  -6  -6    2.50    7.30
   4  -6  -6    3.20   10.60
  -4   6   6    9.10    6.40
  -4   6   6    8.20    6.20
  -4   6   6   -6.80    7.30
   3  -6  -6  116.79   14.30
   3  -6  -6  112.79   18.70
   3  -6  -6   64.09   25.30
  -3   6   6   65.39   14.40
  -3   6   6  110.99   12.40
  -3   6   6  100.29   14.70
  -3   6   6  106.29   12.50
  -3   6   6   95.79   15.60
   2  -6  -6   89.59   20.10
   2  -6  -6   60.09   11.80
  -2   6   6   67.09   13.30
   1  -6  -6  152.38   29.30
   1  -6  -6  104.99   11.30
   1  -6  -6   91.59   21.90
   1  -6  -6  107.89   11.60
  -1   6   6  111.49   15.70
  -1   6   6  120.39   13.30
   0  -6  -6  153.88   31.40
   0  -6  -6  122.39   22.10
   0  -6  -6  128.89   40.40
   0  -6  -6  144.79   12.40
   0  -6  -6  132.79   12.70
   0   6   6  129.89   16.00
   0   6   6  153.28   16.10
   0   6   6  129.89   17.80
   0   6   6  129.79   14.90
  -1  -6  -6  138.79   40.00
  -1  -6  -6  127.59   10.20
  -1  -6  -6  111.69   19.20
  -1  -6  -6   93.79   11.10
  -1  -6  -6  148.89   33.70
   1   6   6   98.69   15.40
   1   6   6  117.99   14.60
  -2  -6  -6   82.69    7.90
  -2  -6  -6  159.48   39.30
  -2  -6  -6  135.69   42.50
   2   6   6   61.99   15.00
   2   6   6   68.39   14.20
  -3  -6  -6  105.79   11.50
   3   6   6  167.28   16.40
   3   6   6  162.38   22.00
   3   6   6  145.69   15.10
  -4  -6  -6    5.80   12.10
  -4  -6  -6    2.30    2.90
   4   6   6    6.00    6.30
   4   6   6    5.70    7.40
   5   6   6   98.89   12.80
   6   6   6   10.80    5.10
   5  -7  -6   -4.00    6.50
   5  -7  -6    7.20    8.70
  -5   7   6    4.40    5.70
  -5   7   6   12.30    6.30
   4  -7  -6   85.19   11.90
   4  -7  -6   76.89   12.90
   4  -7  -6   90.19   18.20
  -4   7   6   59.19   12.80
  -4   7   6   54.39   11.70
   3  -7  -6  129.09   15.20
   3  -7  -6  129.39   19.40
  -3   7   6  120.09   14.10
  -3   7   6   93.09   17.10
  -3   7   6  128.19   14.10
  -3   7   6  131.49   15.80
  -3   7   6   92.49   20.40
   2  -7  -6   95.19   11.20
   2  -7  -6   76.29   11.80
   2  -7  -6   64.19   14.50
  -2   7   6   51.29   10.60
  -2   7   6   59.09   13.40
  -2   7   6   55.69    9.90
  -2   7   6   57.89   10.00
  -2   7   6   62.29   11.90
   1  -7  -6  217.08   22.10
   1  -7  -6  223.18   19.90
   1  -7  -6  192.88   30.20
   1  -7  -6  285.17   39.90
  -1   7   6  213.98   24.60
   0  -7  -6   14.70   18.90
   0  -7  -6   13.80   24.30
   0  -7  -6    5.70    4.00
   0  -7  -6   -0.60    3.30
   0  -7  -6    1.50   13.90
   0   7   6    6.30    8.70
  -1  -7  -6  218.68   19.00
  -1  -7  -6  276.47   54.19
  -1  -7  -6  219.58   19.20
  -1  -7  -6  288.87   46.30
   1   7   6  236.88   30.50
   1   7   6  226.38   22.70
  -2  -7  -6   75.39    7.70
   2   7   6   67.59   12.60
   2   7   6   87.29   17.80
   2   7   6   51.79   11.10
  -3  -7  -6  135.99   12.30
   3   7   6  142.49   17.20
   3   7   6  154.38   22.00
   3   7   6  139.29   16.30
  -4  -7  -6   68.79    7.60
   4   7   6  105.09   13.10
   4   7   6  110.79   18.40
   5   7   6   -0.40    6.00
   5  -8  -6   79.39   10.40
   5  -8  -6   68.49   11.00
  -5   8   6   83.69   10.50
  -5   8   6   83.79    9.70
   4  -8  -6   50.29    9.70
   4  -8  -6   25.00    9.50
  -4   8   6   48.10   10.00
  -4   8   6   32.80    7.60
   3  -8  -6   59.29   11.50
   3  -8  -6   58.89   11.40
  -3   8   6   42.90    8.40
  -3   8   6   38.70    9.10
  -3   8   6   53.59   10.80
   2  -8  -6   24.10    7.60
   2  -8  -6   37.50   10.10
   2  -8  -6   44.30   10.30
  -2   8   6   13.50   11.70
  -2   8   6   19.00    7.30
  -2   8   6   12.60    6.90
  -2   8   6   24.30   10.00
  -2   8   6   18.30    6.90
  -2   8   6    6.00   11.50
   1  -8  -6   12.90    6.50
   1  -8  -6   15.00    8.60
   1  -8  -6    8.80    5.20
   1  -8  -6    9.90    4.60
  -1   8   6    2.60    7.90
  -1   8   6   20.50    6.90
  -1   8   6   16.80   10.80
  -1   8   6   17.70   10.90
  -1   8   6   16.20   12.10
  -1   8   6   12.50    6.40
  -1   8   6   24.40    7.60
   0  -8  -6   76.79   10.20
   0  -8  -6   81.99    9.70
   0  -8  -6   75.59   13.60
   0  -8  -6   89.29   10.70
   0   8   6   67.69   15.60
   0   8   6   74.29   15.40
   0   8   6   77.99   12.70
   0   8   6   81.89   15.30
  -1  -8  -6   19.90    4.50
  -1  -8  -6   13.50    3.90
   1   8   6   15.30    9.00
   1   8   6   11.90   12.90
   1   8   6   17.10    8.60
   1   8   6    8.50    7.90
  -2  -8  -6   19.80    5.00
  -2  -8  -6   21.20    4.30
   2   8   6   15.00    8.70
   2   8   6   40.10    9.60
   2   8   6   23.30    8.40
   2   8   6   35.40   13.90
  -3  -8  -6   41.60    6.80
   3   8   6   50.89   15.60
   3   8   6   52.49    9.50
   4   8   6   49.00   13.80
   4   8   6   44.20   10.60
   5   8   6   98.39   11.10
   4  -9  -6   47.50    7.80
   4  -9  -6   17.40    7.70
  -4   9   6   38.00    7.10
  -4   9   6   25.90    6.40
   3  -9  -6    5.80    8.50
   3  -9  -6    8.20    6.20
  -3   9   6   16.00    6.40
  -3   9   6    5.50    6.20
  -3   9   6   -1.40    6.10
   2  -9  -6  143.59   21.10
   2  -9  -6   96.39   18.80
   2  -9  -6  145.49   15.60
  -2   9   6  127.99   15.20
  -2   9   6  127.99   15.70
  -2   9   6  141.19   14.60
  -2   9   6  127.49   24.40
  -2   9   6  122.69   20.60
   1  -9  -6  142.49   15.00
   1  -9  -6  156.58   16.00
   1  -9  -6  152.68   16.70
  -1   9   6  146.79   24.80
  -1   9   6  153.68   16.90
  -1   9   6  168.58   19.70
  -1   9   6  164.48   22.10
   0  -9  -6  729.53   59.39
   0  -9  -6  748.73   59.79
   0  -9  -6  754.72   59.39
   0   9   6  759.62   64.49
   0   9   6  709.93   61.59
   0   9   6  729.53   60.39
   0   9   6  689.43   61.99
  -1  -9  -6  175.28   15.90
  -1  -9  -6  164.38   15.00
   1   9   6  158.48   20.00
   1   9   6  128.39   17.60
   1   9   6  162.48   21.80
   1   9   6  178.18   20.50
   1   9   6  150.28   26.80
  -2  -9  -6  137.79   14.10
  -2  -9  -6  136.49   13.10
   2   9   6  139.19   24.60
   2   9   6  163.78   18.20
   2   9   6  147.99   18.50
   2   9   6  150.08   19.20
  -3  -9  -6    2.80    3.10
   3   9   6    6.80    7.60
   3   9   6    5.90    6.70
   4   9   6   40.40    8.90
   4   9   6   36.30   11.40
   3 -10  -6   39.30    8.10
  -3  10   6   34.20    6.90
  -3  10   6   25.30    6.50
  -3  10   6   19.70    5.40
   2 -10  -6   28.40    6.40
   2 -10  -6   14.50    9.70
  -2  10   6   27.20   10.30
  -2  10   6   21.50    8.00
  -2  10   6   15.30    6.40
  -2  10   6    5.80   10.20
  -2  10   6    4.80    6.60
   1 -10  -6  111.89   12.70
   1 -10  -6   94.69   12.20
  -1  10   6  105.49   21.10
  -1  10   6  107.39   17.80
  -1  10   6  116.19   13.50
  -1  10   6  104.09   14.30
   0 -10  -6  116.49   13.60
   0 -10  -6   97.59   10.80
   0  10   6   82.39   17.60
   0  10   6   92.09   14.40
   0  10   6  115.49   21.50
   0  10   6  107.69   13.40
  -1 -10  -6  122.19   12.50
  -1 -10  -6  113.09   11.90
   1  10   6  123.09   17.30
   1  10   6  123.79   21.00
   1  10   6  107.99   15.90
   1  10   6   89.39   13.20
   1  10   6  101.29   17.10
  -2 -10  -6   18.10    4.60
   2  10   6   10.30    8.30
   2  10   6    9.70   11.30
   2  10   6   16.50    7.00
   2  10   6    5.40    7.10
   3  10   6   24.90    6.70
   3  10   6   27.80    7.30
   2 -11  -6    9.90    4.40
  -2  11   6    9.60    4.40
   1 -11  -6  131.59   16.50
   1 -11  -6  115.39   11.30
  -1  11   6  100.79   12.40
  -1  11   6  114.49   15.10
  -1  11   6  102.09   16.10
  -1  11   6  112.69   11.80
   0 -11  -6   10.50    4.70
   0  11   6   15.20    9.80
   0  11   6   13.70    6.20
   0  11   6    7.50    5.40
   0  11   6   23.30    9.10
  -1 -11  -6  114.09   11.40
   1  11   6  102.69   14.20
   1  11   6  121.29   12.80
   1  11   6   96.39   13.10
   1  11   6  104.39   17.70
   2  11   6    6.00    5.70
   2  11   6    4.10    4.60
   1  11  -7  106.29   10.90
   1  11  -7   90.59   19.40
   1  11  -7   60.49   12.20
   1  11  -7   69.09   11.80
  -1 -11   7   91.09   12.10
   0  11  -7  100.99   14.20
   0  11  -7   83.89   18.50
   0  11  -7  136.19   13.00
   0 -11   7  145.39   15.10
  -1  11  -7  110.49   11.40
  -1  11  -7   82.09   12.90
   3  10  -7   35.50   11.40
   3  10  -7   32.80   11.20
   3  10  -7   33.20    6.30
   2  10  -7   -1.50    8.60
   2  10  -7   25.90   12.50
   2  10  -7   13.50    6.50
  -2 -10   7    4.50    6.10
   1  10  -7   34.10   12.60
   1  10  -7   54.39   11.60
   1  10  -7   45.70    8.40
  -1 -10   7   65.09   14.00
  -1 -10   7   73.99   15.10
   0  10  -7   -8.30    9.60
   0  10  -7    4.60    6.30
   0  10  -7    5.20    7.70
   0  10  -7    5.30   12.70
   0 -10   7   -5.20    8.40
   0 -10   7    6.70    9.90
  -1  10  -7   66.39   13.80
  -1  10  -7   44.20    8.90
  -1  10  -7   61.59   11.00
   1 -10   7   49.10    8.80
   1 -10   7   68.69   14.60
  -2  10  -7   12.70    6.10
  -2  10  -7    8.10    8.00
   2 -10   7    6.10    5.00
  -3  10  -7   37.60    6.50
  -3  10  -7   34.20    6.20
   4   9  -7   28.20   10.60
   4   9  -7   23.80    5.90
   3   9  -7    3.10   10.80
   3   9  -7   13.70    7.30
   3   9  -7   19.00   13.50
   2   9  -7   33.10   13.50
   2   9  -7   74.79   20.30
   2   9  -7   21.50    8.00
   2   9  -7   25.80   11.60
  -2  -9   7   18.80    7.20
  -2  -9   7   26.00    7.90
   1   9  -7   71.09   14.00
   1   9  -7   57.49   13.90
   1   9  -7   65.59   14.20
   1   9  -7   88.99   22.50
   1   9  -7   79.49   11.40
  -1  -9   7   46.70   10.30
   0   9  -7   15.80   13.10
   0   9  -7   19.70   11.00
   0   9  -7    4.70    8.00
   0  -9   7   18.50    9.20
   0  -9   7    7.10    7.60
  -1   9  -7   60.29   12.70
  -1   9  -7   51.69    9.30
  -1   9  -7   59.89    9.90
   1  -9   7   66.39   15.30
   1  -9   7   53.79    9.00
   1  -9   7   58.89   11.10
  -2   9  -7   34.40    8.10
  -2   9  -7   33.60    7.40
  -2   9  -7   12.40   10.20
   2  -9   7   29.80   11.10
   2  -9   7   39.70    8.50
  -3   9  -7   16.10    7.00
  -3   9  -7    9.90    6.70
  -3   9  -7   12.10    6.90
   3  -9   7   14.90    7.30
   3  -9   7   13.00    7.20
  -4   9  -7   26.80    6.10
  -4   9  -7   29.20    6.20
  -4   9  -7   21.40    5.10
   4  -9   7   23.40    6.50
   4  -9   7   24.50    5.50
   5   8  -7    2.90    5.30
   4   8  -7   52.89   12.00
   4   8  -7   40.10   13.70
   3   8  -7   19.80   11.20
   3   8  -7   55.89   15.60
   3   8  -7   33.30    8.90
   2   8  -7    5.10   12.60
   2   8  -7    9.60   11.60
   2   8  -7   13.10    9.70
   2   8  -7    1.30    7.50
  -2  -8   7   13.70    6.30
   1   8  -7  240.48   23.00
   1   8  -7  198.78   23.20
   1   8  -7  234.38   25.70
   1   8  -7  250.17   29.50
   1   8  -7  203.68   26.90
  -1  -8   7  210.88   21.60
  -1  -8   7  256.67   21.70
   0   8  -7   21.10    7.80
   0   8  -7    6.40   10.90
   0   8  -7   25.70    8.20
   0   8  -7   10.00   12.00
   0  -8   7   29.80    8.10
   0  -8   7   25.60    7.10
   0  -8   7   13.10    8.10
  -1   8  -7  200.98   23.10
  -1   8  -7  255.37   25.60
  -1   8  -7  249.68   21.60
  -1   8  -7  249.18   25.00
   1  -8   7  218.48   23.40
   1  -8   7  215.58   24.00
   1  -8   7  231.98   21.80
  -2   8  -7    7.80    9.90
  -2   8  -7   12.60    7.00
  -2   8  -7   11.90    7.50
  -2   8  -7   14.90    7.80
   2  -8   7   17.30   11.50
   2  -8   7   11.20    7.10
   2  -8   7   -4.40    7.30
  -3   8  -7   24.10    8.00
  -3   8  -7   38.10    8.80
  -3   8  -7   30.50    8.80
   3  -8   7   51.59    8.80
   3  -8   7   47.00   12.50
  -4   8  -7   60.09   11.30
  -4   8  -7   68.19   11.00
  -4   8  -7   55.89   11.20
   4  -8   7   51.89   10.60
   4  -8   7   26.00    9.20
  -5   8  -7   -1.10    4.50
  -5   8  -7   -4.50    4.60
   5  -8   7    9.40    7.00
   5   7  -7   39.70    8.10
   5   7  -7   42.50    6.80
   4   7  -7  -10.10   13.10
   4   7  -7    0.80    7.60
  -4  -7   7   -2.10    4.50
   3   7  -7  251.17   32.80
   3   7  -7  252.47   33.10
   3   7  -7  287.57   26.60
   3   7  -7  362.96   34.60
  -3  -7   7  235.68   23.60
   2   7  -7  498.45   47.30
   2   7  -7  480.75   44.80
   2   7  -7  482.75   42.80
   2   7  -7  494.15   45.70
  -2  -7   7  529.05   41.40
   1   7  -7  600.14   51.49
  -1  -7   7  558.64   51.99
  -1  -7   7  666.73   49.99
  -1  -7   7  564.84   51.19
  -1  -7   7  630.04   49.99
   0   7  -7  157.78   18.20
   0  -7   7  151.78   18.50
   0  -7   7  190.98   17.00
   0  -7   7  137.89   17.20
   0  -7   7  169.28   26.60
   0  -7   7  156.88   17.70
  -1   7  -7  580.54   48.20
   1  -7   7  534.15   49.30
   1  -7   7  534.75   48.80
   1  -7   7  613.94   47.80
  -2   7  -7  566.84   42.30
  -2   7  -7  470.45   42.00
  -2   7  -7  576.64   43.70
   2  -7   7  520.35   45.90
   2  -7   7  484.05   41.90
   2  -7   7  405.96   42.10
  -3   7  -7  297.37   27.90
  -3   7  -7  308.07   28.50
   3  -7   7  302.47   31.70
   3  -7   7  315.67   27.80
  -4   7  -7    1.30    6.40
  -4   7  -7   -3.30    7.00
   4  -7   7   -2.30    7.10
   4  -7   7   11.60   11.80
  -5   7  -7   52.39   10.00
  -5   7  -7   44.20    7.80
   5  -7   7   54.19   11.60
   5  -7   7   41.60    7.80
   6   6  -7   14.70    5.20
   6   6  -7   24.70    5.00
   5   6  -7   -7.40    7.30
   5   6  -7    3.40    4.30
   4   6  -7   48.20   14.50
   4   6  -7   35.50    8.80
   4   6  -7   29.00    6.00
   4   6  -7   42.90   14.50
  -4  -6   7   26.70    5.50
   3   6  -7  138.39   18.10
   3   6  -7  105.19   23.90
   3   6  -7  172.68   26.40
  -3  -6   7  148.89   14.50
   2   6  -7   72.29   10.20
   2   6  -7   93.29   12.30
  -2  -6   7   74.79   10.90
  -2  -6   7   85.59   10.30
  -2  -6   7   65.99   12.40
   1   6  -7  158.08   17.70
   1   6  -7  172.88   19.00
  -1  -6   7  222.58   17.40
  -1  -6   7  194.08   20.10
  -1  -6   7  191.38   17.60
  -1  -6   7  187.88   18.70
   0   6  -7   33.70    8.00
   0  -6   7   24.90    7.90
   0  -6   7   49.00   10.00
   0  -6   7   40.60    8.90
   0  -6   7   41.50    8.80
  -1   6  -7  190.68   17.90
  -1   6  -7  200.08   39.60
  -1   6  -7  190.48   18.70
   1  -6   7  145.49   16.90
   1  -6   7  165.88   17.80
   1  -6   7  151.28   18.20
   1  -6   7  152.88   18.50
  -2   6  -7   80.59   34.40
  -2   6  -7   78.19   11.90
  -2   6  -7   71.09   13.30
   2  -6   7   90.89   14.20
   2  -6   7   68.49   13.60
  -3   6  -7  128.59   19.10
  -3   6  -7  174.68   17.70
  -3   6  -7  182.58   17.90
   3  -6   7  175.98   22.30
   3  -6   7  136.09   16.80
  -4   6  -7   40.20    8.80
  -4   6  -7   47.80   11.30
   4  -6   7   44.80   12.80
   4  -6   7   47.80    9.00
  -5   6  -7    3.90    6.10
  -5   6  -7    5.70    4.70
   5  -6   7    1.10   10.40
   5  -6   7    8.30    6.70
  -6   6  -7   44.30    8.00
   6  -6   7   18.50    7.10
   6  -6   7   22.40    5.40
   6  -6   7   18.80    5.20
   6   5  -7   18.20    4.60
   6   5  -7   15.40    6.80
   5   5  -7   72.09   14.50
   5   5  -7   93.49   16.40
   5   5  -7   98.49   11.50
   4   5  -7   71.89   13.90
   4   5  -7   41.70    9.20
   4   5  -7   56.89   16.10
   4   5  -7   56.39   15.10
   4   5  -7   47.60   12.90
  -4  -5   7   42.90    7.90
   3   5  -7  158.28   17.20
   3   5  -7  161.58   15.00
  -3  -5   7  133.69   14.80
  -3  -5   7  133.19   15.30
  -3  -5   7  160.78   14.70
   2   5  -7   58.09    8.80
   2   5  -7   69.99   11.80
   2   5  -7   76.39   13.60
  -2  -5   7   58.19    8.40
  -2  -5   7   67.89    8.70
  -2  -5   7   64.69    9.80
   1   5  -7  622.54   51.59
   1   5  -7  606.24   50.99
  -1  -5   7  606.14   50.59
  -1  -5   7  661.73   52.39
  -1  -5   7  629.54   50.99
  -1  -5   7  645.74   51.79
   0   5  -7   29.30    6.70
   0   5  -7   24.10   17.10
   0  -5   7   15.90    6.90
   0  -5   7   25.70    6.60
   0  -5   7   29.10    5.30
   0  -5   7   28.40    7.30
  -1   5  -7  632.34   64.39
  -1   5  -7  649.24   51.19
  -1   5  -7  640.24   51.79
   1  -5   7  597.34   51.79
   1  -5   7  576.64   51.79
  -2   5  -7   69.59   12.80
  -2   5  -7   56.89   10.40
  -2   5  -7   73.49   29.60
   2  -5   7   63.69   12.80
   2  -5   7   85.09   12.30
  -3   5  -7  143.59   42.30
  -3   5  -7  142.69   18.10
  -3   5  -7  139.89   18.10
   3  -5   7  176.08   19.80
  -4   5  -7   42.60   10.50
  -4   5  -7   47.20   10.60
  -4   5  -7   40.40   10.20
  -4   5  -7   35.10    7.00
   4  -5   7   41.00    8.50
   4  -5   7   64.49   12.90
  -5   5  -7   89.39   10.30
  -5   5  -7  100.19   13.10
  -5   5  -7  110.19   13.80
   5  -5   7   89.19   19.10
   5  -5   7   90.39   13.60
  -6   5  -7   31.00    6.80
  -6   5  -7   18.90    4.30
   6  -5   7   23.00    5.80
   6  -5   7   22.60    6.10
   6  -5   7   24.10    8.40
   6   4  -7   15.10    4.90
   6   4  -7    7.00    7.50
  -6  -4   7    1.80    5.00
   5   4  -7    5.70    8.60
   5   4  -7   16.30    8.20
   5   4  -7   14.70    5.50
   5   4  -7   11.40   11.70
  -5  -4   7   13.20    6.00
   4   4  -7   55.99   13.00
   4   4  -7   58.19   13.40
   4   4  -7   57.89   12.90
   4   4  -7   51.99   14.50
   4   4  -7   39.70    8.60
   4   4  -7   27.00   15.50
   3   4  -7  537.25   46.10
   3   4  -7  575.34   45.20
  -3  -4   7  493.45   44.30
  -3  -4   7  590.94   45.20
  -3  -4   7  542.65   45.50
   2   4  -7   24.90    6.40
   2   4  -7   26.80    5.40
  -2  -4   7   50.89    6.90
  -2  -4   7   52.49    8.00
   1   4  -7   19.40    4.90
   1   4  -7   12.40   12.20
   1   4  -7   16.50    6.10
   1   4  -7   11.90    3.90
  -1  -4   7   25.20    5.50
  -1  -4   7   15.00    4.10
  -1  -4   7   19.00    4.30
   0   4  -7  740.43   65.79
   0   4  -7  634.44   54.69
   0   4  -7  726.83   55.39
   0  -4   7  676.53   54.89
   0  -4   7  633.74   55.49
   0  -4   7  727.53   55.69
   0  -4   7  634.84   54.59
  -1   4  -7   19.30   14.30
  -1   4  -7   20.50    6.00
  -1   4  -7   22.50    6.30
   1  -4   7   15.00    6.30
   1  -4   7   11.70    4.70
   1  -4   7    7.90    5.80
  -2   4  -7   57.89   18.40
  -2   4  -7   49.60    9.00
  -2   4  -7   50.39   11.50
  -2   4  -7   50.59   10.70
   2  -4   7   26.00    8.30
   2  -4   7   19.80    8.60
  -3   4  -7  498.65   59.09
  -3   4  -7  555.44   46.80
  -3   4  -7  594.64   47.20
   3  -4   7  469.05   47.00
   3  -4   7  582.44   46.40
  -4   4  -7   72.79    8.50
  -4   4  -7   64.79   16.20
  -4   4  -7   72.79   12.00
  -4   4  -7   79.19   12.60
   4  -4   7   53.79   12.90
   4  -4   7   50.79   10.90
  -5   4  -7   24.10    7.50
  -5   4  -7   17.70    4.70
  -5   4  -7   12.90    7.40
   5  -4   7   10.70   10.20
   5  -4   7   14.70    7.00
  -6   4  -7   18.90    4.50
  -6   4  -7   14.20    6.20
  -6   4  -7   17.00    6.10
   6  -4   7   15.60    8.40
   6  -4   7   16.50    6.30
   6  -4   7   21.70    6.20
   6   3  -7   84.19   14.40
   6   3  -7   71.99   10.50
   6   3  -7   80.09   13.60
  -6  -3   7   66.99   11.10
   5   3  -7  153.78   19.00
   5   3  -7  171.78   23.50
   5   3  -7  135.89   15.90
   5   3  -7  157.28   18.90
  -5  -3   7  157.98   16.10
  -5  -3   7  155.28   15.40
   4   3  -7  365.66   36.30
   4   3  -7  396.36   35.70
  -4  -3   7  446.06   35.70
  -4  -3   7  470.85   34.70
  -4  -3   7  398.66   36.00
   3   3  -7  155.68   15.20
   3   3  -7  136.89   14.20
  -3  -3   7  140.69   14.30
  -3  -3   7  135.29   12.90
  -3  -3   7  135.39   13.80
   2   3  -7  134.39   12.90
   2   3  -7  125.69   12.30
  -2  -3   7  111.89   11.90
  -2  -3   7  121.39   12.00
  -2  -3   7  111.69   12.10
  -2  -3   7  116.79   11.70
   1   3  -7  283.37   32.20
   1   3  -7  285.27   32.10
   1   3  -7  277.37   23.30
   1   3  -7  268.57   23.40
   1   3  -7  272.57   24.40
  -1  -3   7  273.47   23.10
  -1  -3   7  291.97   23.90
  -1  -3   7  266.57   23.40
   0   3  -7  297.77   23.00
   0   3  -7  243.58   22.00
   0   3  -7  266.27   31.40
   0  -3   7  293.17   23.10
   0  -3   7  239.78   22.30
   0  -3   7  255.77   23.10
  -1   3  -7  260.27   24.20
  -1   3  -7  237.88   30.40
  -1   3  -7  289.57   34.50
  -1   3  -7  289.67   23.30
   1  -3   7  269.17   23.50
   1  -3   7  265.67   23.10
   1  -3   7  255.07   23.90
  -2   3  -7   94.29   13.20
  -2   3  -7  128.19   26.60
  -2   3  -7  116.89   14.90
   2  -3   7  123.89   12.70
   2  -3   7   93.49   13.60
  -3   3  -7  127.19   17.00
  -3   3  -7  123.19   28.40
  -3   3  -7  127.29   17.20
   3  -3   7  144.69   15.90
   3  -3   7  144.69   16.50
  -4   3  -7  432.06   37.60
  -4   3  -7  468.45   38.70
   4  -3   7  427.96   36.70
   4  -3   7  363.06   37.10
   4  -3   7  337.07   38.50
  -5   3  -7  144.79   21.40
  -5   3  -7  151.28   17.80
  -5   3  -7  151.68   16.60
  -5   3  -7  135.19   13.60
   5  -3   7  178.78   20.00
   5  -3   7  114.99   16.60
   5  -3   7  140.39   15.60
  -6   3  -7   76.49   11.60
  -6   3  -7   79.19    8.60
  -6   3  -7   59.69   10.50
   6  -3   7   49.80   10.70
   6  -3   7   65.09   10.40
   6  -3   7   73.79   13.80
   7   2  -7  138.19   14.20
  -7  -2   7  139.59   13.00
   6   2  -7   12.50    9.50
   6   2  -7    9.00    5.00
   6   2  -7   19.30    7.00
   6   2  -7   13.90    6.80
  -6  -2   7    7.80    5.80
  -6  -2   7    7.60    5.00
  -6  -2   7    8.50    4.60
   5   2  -7   24.40    6.20
   5   2  -7   24.30    7.40
   5   2  -7   27.10    7.60
   5   2  -7   20.40    9.40
   5   2  -7   27.20   13.20
  -5  -2   7   16.00    6.10
  -5  -2   7   19.70    5.50
   4   2  -7  300.37   26.70
   4   2  -7  293.67   27.30
  -4  -2   7  311.37   25.20
  -4  -2   7  320.27   26.20
  -4  -2   7  286.57   24.90
  -4  -2   7  258.67   26.50
   3   2  -7  220.28   20.00
   3   2  -7  221.28   19.40
  -3  -2   7  198.38   19.40
  -3  -2   7  205.78   17.90
  -3  -2   7  205.38   18.90
   2   2  -7  815.02   71.59
   2   2  -7  881.61   66.59
   2   2  -7  829.32   69.29
   2   2  -7  872.21   66.89
  -2  -2   7  797.82   66.29
  -2  -2   7  754.82   66.39
   1   2  -7 1156.88   99.79
   1   2  -7 1170.48   95.29
   1   2  -7 1093.19   94.79
   1   2  -7 1159.88   99.69
   1   2  -7 1081.39   94.79
   1   2  -7 1185.58   97.09
  -1  -2   7 1159.88   97.79
  -1  -2   7 1273.67   94.89
  -1  -2   7 1238.78   94.89
  -1  -2   7 1366.96   95.19
   0   2  -7  574.84   53.79
   0   2  -7  566.94   51.79
   0   2  -7  531.55   45.60
   0  -2   7  573.74   46.30
   0  -2   7  608.24   46.00
   0  -2   7  531.25   48.90
   0  -2   7  588.04   45.90
  -1   2  -7 1131.99   88.99
  -1   2  -7 1117.49   91.89
  -1   2  -7 1095.29   84.99
   1  -2   7 1125.79   84.29
   1  -2   7  920.81   84.39
   1  -2   7 1035.30   84.69
   1  -2   7  928.71   87.59
  -2   2  -7  747.03   62.39
  -2   2  -7  702.53   69.79
   2  -2   7  827.02   61.59
   2  -2   7  681.33   61.09
   2  -2   7  817.42   61.89
  -3   2  -7  210.08   21.80
  -3   2  -7  174.88   31.70
  -3   2  -7  166.98   21.30
   3  -2   7  221.28   20.10
   3  -2   7  225.58   20.50
  -4   2  -7  304.97   29.40
  -4   2  -7  286.67   29.90
   4  -2   7  236.48   28.80
   4  -2   7  281.37   27.60
   4  -2   7  324.47   28.10
  -5   2  -7   25.00    6.50
  -5   2  -7   25.60   12.00
  -5   2  -7   30.30    8.90
  -5   2  -7   24.00    7.40
  -5   2  -7   25.40    5.00
   5  -2   7   23.10    8.40
   5  -2   7   22.10    6.60
   5  -2   7   19.60    9.50
  -6   2  -7   20.30    4.90
  -6   2  -7   21.80    7.00
  -6   2  -7   18.20    8.00
   6  -2   7   18.50    6.80
   6  -2   7   14.20    5.20
   6  -2   7   12.30    8.10
   6  -2   7   18.60    8.80
  -7   2  -7  113.39   12.50
  -7   2  -7  147.89   11.70
   7  -2   7  127.79   11.90
   7   1  -7   74.29   10.10
   7   1  -7   63.69    9.70
  -7  -1   7   74.09    8.80
   6   1  -7   13.10    9.80
   6   1  -7   28.50    7.40
   6   1  -7    6.80    4.90
   6   1  -7   10.00    6.50
  -6  -1   7    8.50    4.80
  -6  -1   7   19.10    5.50
  -6  -1   7   16.00    5.70
   5   1  -7   25.20    6.60
   5   1  -7   42.50   13.20
   5   1  -7   29.50    9.80
   5   1  -7   32.00    8.10
   5   1  -7   25.60    7.50
  -5  -1   7   48.40    9.40
  -5  -1   7   41.90    8.40
   4   1  -7    7.10    5.90
   4   1  -7   10.60    6.10
  -4  -1   7   10.40    4.10
  -4  -1   7    9.90    6.00
  -4  -1   7    8.40    6.60
  -4  -1   7   12.60    4.60
  -4  -1   7    8.40    5.10
   3   1  -7  842.32   75.49
   3   1  -7  831.52   72.79
   3   1  -7  837.22   72.99
  -3  -1   7  909.51   71.89
  -3  -1   7  963.50   72.59
  -3  -1   7  954.00   73.39
  -3  -1   7  948.61   72.99
   2   1  -7   29.90    7.60
   2   1  -7   32.70    6.20
   2   1  -7   48.00   11.10
   2   1  -7   37.30   15.40
  -2  -1   7   60.29    7.70
  -2  -1   7   64.79    6.90
  -2  -1   7   56.99    8.10
   1   1  -7 1626.04  136.59
   1   1  -7 1597.84  136.69
   1   1  -7 1749.92  138.59
   1   1  -7 1719.43  141.29
   1   1  -7 1797.82  136.99
  -1  -1   7 1725.33  136.69
  -1  -1   7 1746.83  139.29
  -1  -1   7 1854.41  136.89
  -1  -1   7 1675.43  136.69
   0   1  -7   14.80   11.60
   0   1  -7   26.90    8.50
   0   1  -7   15.40   11.00
   0   1  -7   10.70    3.50
   0  -1   7   17.30    3.80
   0  -1   7    7.50    3.40
   0  -1   7   14.80    3.70
   0  -1   7    8.50    7.20
   0  -1   7    7.70    3.80
  -1   1  -7 1510.95  131.59
  -1   1  -7 1629.34  135.09
  -1   1  -7 1722.63  137.39
   1  -1   7 1745.53  131.09
   1  -1   7 1671.23  130.99
   1  -1   7 1651.23  133.79
   1  -1   7 1584.84  130.99
  -2   1  -7   48.90   11.50
  -2   1  -7   70.99   13.40
  -2   1  -7   63.09   24.60
   2  -1   7   19.00    9.20
   2  -1   7   38.60    7.80
   2  -1   7   38.60    8.00
   2  -1   7   40.20    7.30
  -3   1  -7  917.81   83.09
  -3   1  -7  932.61   74.89
  -3   1  -7  946.71   71.69
  -3   1  -7 1002.00   75.09
   3  -1   7  828.42   74.19
   3  -1   7  782.42   73.19
   3  -1   7  881.91   73.39
  -4   1  -7   10.10    3.70
  -4   1  -7    2.00    8.90
  -4   1  -7    1.10    9.10
  -4   1  -7    9.00    3.60
   4  -1   7    2.60    7.70
   4  -1   7    7.10    9.20
   4  -1   7    6.10    7.60
  -5   1  -7   40.20   13.50
  -5   1  -7   45.60    7.00
  -5   1  -7   49.70    7.60
  -5   1  -7   42.90    7.10
   5  -1   7   34.80    8.60
   5  -1   7   33.40    7.20
   5  -1   7   37.20   10.00
   5  -1   7   27.20    6.10
   5  -1   7   35.30    8.10
  -6   1  -7   12.40    3.50
  -6   1  -7   18.90    4.80
  -6   1  -7   23.70    8.20
   6  -1   7   13.90    8.20
   6  -1   7   11.70    6.30
   6  -1   7   18.90    7.10
   6  -1   7   15.90    3.30
  -7   1  -7   48.70    8.40
  -7   1  -7   61.09    6.60
  -7   1  -7   52.29    6.50
   7  -1   7   69.19    7.20
   7  -1   7   54.29    7.50
   7   0  -7    7.10    5.70
   7   0  -7    1.70    4.70
  -7   0   7   -2.40    2.60
   6   0  -7   29.60    7.00
   6   0  -7   15.30    7.50
   6   0  -7   14.00    9.40
  -6   0   7   16.00    4.90
  -6   0   7   12.30    5.10
  -6   0   7   21.80    5.70
   5   0  -7   32.10    8.40
   5   0  -7   46.00    7.80
   5   0  -7   33.80   10.20
  -5   0   7   44.60    9.70
  -5   0   7   40.30    9.00
  -5   0   7   43.90    8.10
   4   0  -7  150.08   16.50
   4   0  -7  124.99   15.80
  -4   0   7  129.89   13.70
  -4   0   7  141.79   15.40
  -4   0   7  158.28   14.40
  -4   0   7  135.39   16.30
  -4   0   7  155.08   14.50
   3   0  -7  176.88   18.60
   3   0  -7  174.18   17.40
   3   0  -7  164.58   17.30
   3   0  -7  184.38   21.70
  -3   0   7  193.28   17.00
  -3   0   7  175.58   16.20
  -3   0   7  170.48   16.00
  -3   0   7  182.98   18.10
   2   0  -7  605.94   50.89
   2   0  -7  572.04   53.49
   2   0  -7  620.24   48.90
   2   0  -7  571.64   48.00
   2   0  -7  528.65   48.20
  -2   0   7  594.04   48.30
  -2   0   7  564.04   53.49
  -2   0   7  604.14   47.70
  -2   0   7  635.94   48.00
   1   0  -7  115.59   13.70
   1   0  -7  156.88   23.40
   1   0  -7  151.58   13.30
   1   0  -7  166.68   18.30
  -1   0   7  138.19   13.10
  -1   0   7  147.59   13.60
  -1   0   7  175.08   13.50
  -1   0   7  158.68   17.00
   0   0  -7    1.00   11.10
   0   0  -7    3.10    7.50
   0   0  -7    1.50    5.10
   0   0  -7    6.60   12.00
   0   0   7    2.80    5.50
   0   0   7    4.60    3.20
   0   0   7    2.60    2.60
   0   0   7    2.00    3.80
   0   0   7   -1.30    2.70
  -1   0  -7  130.59   15.90
  -1   0  -7  157.28   23.50
   1   0   7  134.09   13.30
   1   0   7  170.28   17.10
   1   0   7  119.39   13.80
   1   0   7  117.89   13.40
   1   0   7  148.49   12.50
   1   0   7  129.09   12.70
  -2   0  -7  669.33   59.29
  -2   0  -7  592.34   48.90
  -2   0  -7  516.95   48.10
   2   0   7  559.34   46.80
   2   0   7  567.34   51.09
   2   0   7  591.94   47.40
   2   0   7  522.85   47.00
  -3   0  -7  151.58   20.80
  -3   0  -7  191.88   15.20
  -3   0  -7  146.99   32.60
  -3   0  -7  168.38   21.90
   3   0   7  183.68   18.30
  -4   0  -7  136.89   22.00
  -4   0  -7  168.48   14.30
  -4   0  -7  160.48   14.40
  -4   0  -7  162.28   22.30
   4   0   7  138.19   18.50
  -5   0  -7   50.09    7.80
  -5   0  -7   47.40    7.50
  -5   0  -7   35.70   13.90
  -5   0  -7   54.29    8.30
  -5   0  -7   52.29    7.40
   5   0   7   44.90    8.70
   5   0   7   47.40    7.20
   5   0   7   69.69   14.20
   5   0   7   49.60   11.10
   5   0   7   69.49    9.90
  -6   0  -7   19.90    4.50
  -6   0  -7   25.70    8.00
  -6   0  -7   28.30    5.10
  -6   0  -7   16.70    4.10
   6   0   7   23.70    6.20
   6   0   7   24.10    5.70
   6   0   7   21.90    6.80
   6   0   7   34.50    8.40
  -7   0  -7   -0.40    1.80
  -7   0  -7   -0.60    4.70
   7   0   7    1.70    2.20
   7   0   7   -0.40    3.40
   7   0   7    1.50    4.20
   7  -1  -7   73.19    9.30
   7  -1  -7   75.19   10.30
  -7   1   7   59.49    6.90
  -7   1   7   74.69   10.60
  -7   1   7   61.29    8.00
   6  -1  -7   10.30    6.10
   6  -1  -7   12.00    8.80
   6  -1  -7    5.60    7.60
  -6   1   7    3.90    4.10
  -6   1   7    7.80    4.70
  -6   1   7    8.40    5.20
   5  -1  -7   36.60    7.00
   5  -1  -7   49.20    9.80
   5  -1  -7   32.60    9.70
   5  -1  -7   50.19    9.00
   5  -1  -7   46.20   10.40
  -5   1   7   27.90    6.10
  -5   1   7   19.70    5.90
  -5   1   7   40.70    8.20
  -5   1   7   16.10    5.90
  -5   1   7   21.50    5.60
   4  -1  -7   11.10    8.20
   4  -1  -7   25.80    7.50
  -4   1   7   16.90    5.70
  -4   1   7   14.00    5.10
  -4   1   7   16.10    5.10
  -4   1   7   17.40    7.00
  -4   1   7   18.90    5.00
   3  -1  -7  730.23   57.79
   3  -1  -7  730.43   60.79
   3  -1  -7  742.73   58.09
  -3   1   7  639.04   56.49
  -3   1   7  720.83   57.79
  -3   1   7  686.83   57.09
  -3   1   7  675.43   56.69
   2  -1  -7   65.39   10.10
   2  -1  -7   71.89   10.00
   2  -1  -7   69.29   20.50
   2  -1  -7   74.09   15.40
  -2   1   7   51.89   12.60
  -2   1   7   56.49    9.20
  -2   1   7   56.19    7.90
  -2   1   7   58.49    7.10
   1  -1  -7 1578.24  128.09
   1  -1  -7 1632.04  131.49
   1  -1  -7 1460.55  125.79
   1  -1  -7 1518.55  125.99
  -1   1   7 1522.35  127.09
  -1   1   7 1759.52  125.79
  -1   1   7 1697.93  125.99
  -1   1   7 1479.55  125.39
   0  -1  -7   19.70   12.60
   0  -1  -7   14.00    5.60
   0  -1  -7   13.80   13.40
   0  -1  -7   13.40    9.00
   0   1   7    8.50    4.30
   0   1   7   12.20    5.50
   0   1   7    8.80    2.90
   0   1   7   10.30    4.40
   0   1   7   18.20    3.70
  -1  -1  -7 1792.92  135.69
  -1  -1  -7 1591.84  132.39
  -1  -1  -7 1517.35  127.89
   1   1   7 1654.03  127.19
   1   1   7 1583.54  127.39
   1   1   7 1559.94  126.79
   1   1   7 1462.25  129.79
   1   1   7 1589.64  127.49
  -2  -1  -7   59.29   17.90
  -2  -1  -7   42.10   18.20
  -2  -1  -7   58.49   15.20
   2   1   7   68.39   10.80
   2   1   7   72.09   10.60
   2   1   7   72.89    9.40
  -3  -1  -7  686.53   57.09
  -3  -1  -7  616.14   70.49
  -3  -1  -7  678.23   61.09
  -3  -1  -7  737.53   61.19
   3   1   7  770.52   59.99
   3   1   7  797.32   59.29
  -4  -1  -7   13.10    3.70
  -4  -1  -7   16.80    3.60
  -4  -1  -7    8.30   10.70
  -4  -1  -7   18.50   10.60
   4   1   7   11.30    7.40
  -5  -1  -7   30.00    6.90
  -5  -1  -7   19.20    4.90
  -5  -1  -7   31.30    7.20
  -5  -1  -7   19.50   12.90
   5   1   7   42.90    9.30
   5   1   7   37.10    6.40
   5   1   7   43.30    7.90
   5   1   7   46.50    7.00
   5   1   7   44.70    9.70
  -6  -1  -7    5.50    3.40
  -6  -1  -7    8.20    6.90
  -6  -1  -7    8.30    3.90
  -6  -1  -7    5.00    3.50
   6   1   7   16.60    8.00
   6   1   7   10.50    3.40
   6   1   7    8.80    5.40
   6   1   7    8.40    5.90
  -7  -1  -7   68.89    8.50
  -7  -1  -7   61.19    7.10
   7   1   7   67.09    8.40
   7   1   7   70.69    6.90
   7   1   7   73.69    7.90
   7  -2  -7   93.99   13.20
   7  -2  -7   55.59   10.50
  -7   2   7  111.39   11.90
  -7   2   7   80.19    8.30
   6  -2  -7   11.70    5.80
   6  -2  -7    9.40    9.20
   6  -2  -7    5.70    7.80
  -6   2   7    8.10    3.60
  -6   2   7    9.20    6.00
  -6   2   7   11.20    5.40
   5  -2  -7   50.19    9.40
   5  -2  -7   41.30   10.30
   5  -2  -7   34.20    6.90
   5  -2  -7   41.90    8.20
  -5   2   7   38.10    8.60
  -5   2   7   32.30    8.10
  -5   2   7   20.30    6.80
  -5   2   7   46.80    8.30
   4  -2  -7  242.98   24.10
   4  -2  -7  243.58   24.20
  -4   2   7  244.28   21.40
  -4   2   7  229.68   21.80
  -4   2   7  248.18   23.30
   3  -2  -7  137.49   16.40
   3  -2  -7  126.89   21.70
   3  -2  -7  163.18   16.90
  -3   2   7  157.88   14.70
  -3   2   7  166.58   15.90
   2  -2  -7  639.04   60.09
   2  -2  -7  679.93   60.29
   2  -2  -7  712.63   63.29
  -2   2   7  788.02   59.49
  -2   2   7  854.51   60.19
   1  -2  -7 1066.09   90.39
   1  -2  -7 1155.58   96.59
   1  -2  -7 1185.58   92.99
   1  -2  -7 1140.39   90.49
  -1   2   7 1109.09   89.99
   0  -2  -7  612.94   59.99
   0  -2  -7  618.94   55.29
   0  -2  -7  644.44   61.39
   0   2   7  673.83   53.49
   0   2   7  700.33   53.49
   0   2   7  688.33   53.09
  -1  -2  -7  931.11   85.19
   1   2   7  967.70   79.89
  -2  -2  -7  716.63   63.49
  -2  -2  -7  708.23   68.59
  -2  -2  -7  785.92   59.59
   2   2   7  626.94   57.49
   2   2   7  686.73   56.99
   2   2   7  697.93   58.49
  -3  -2  -7  121.29   34.40
  -3  -2  -7  164.78   13.50
  -3  -2  -7  173.58   22.00
  -3  -2  -7  169.88   20.80
   3   2   7  150.58   18.40
   3   2   7  142.19   16.30
  -4  -2  -7  211.98   29.50
  -4  -2  -7  254.97   29.60
  -4  -2  -7  283.57   21.50
  -4  -2  -7  252.47   21.60
   4   2   7  234.68   26.20
  -5  -2  -7   42.50    7.30
  -5  -2  -7   37.20    6.70
  -5  -2  -7   28.10   13.70
   5   2   7   43.40    6.80
   5   2   7   34.90    7.10
   5   2   7   45.30    9.70
   5   2   7   54.19   10.50
  -6  -2  -7    9.90    3.60
  -6  -2  -7    2.50    3.40
  -6  -2  -7    3.40    3.80
  -6  -2  -7   12.00    6.70
   6   2   7    9.00    5.20
   6   2   7   15.70    5.90
   6   2   7   10.60    3.60
   6   2   7    7.90    7.60
   7   2   7  107.09   10.80
   7   2   7  118.69   10.10
   6  -3  -7   59.49   10.70
   6  -3  -7   31.00    9.30
   6  -3  -7   65.19   10.50
   6  -3  -7   53.29   11.30
  -6   3   7   67.79    9.30
  -6   3   7   48.20    9.40
  -6   3   7   53.09   11.90
   5  -3  -7  132.49   18.50
   5  -3  -7  138.29   19.40
   5  -3  -7  156.98   16.20
   5  -3  -7  133.09   16.80
  -5   3   7  141.99   13.90
  -5   3   7  135.39   14.90
  -5   3   7  147.79   16.00
   4  -3  -7  423.86   35.60
   4  -3  -7  369.46   35.30
  -4   3   7  382.36   34.30
   3  -3  -7   93.69   22.60
   3  -3  -7  140.89   15.90
   3  -3  -7  144.69   16.30
  -3   3   7  147.69   14.70
   2  -3  -7  120.99   13.50
   2  -3  -7  113.79   14.20
   2  -3  -7  132.09   19.30
  -2   3   7  108.09   11.10
  -2   3   7  128.29   12.70
   1  -3  -7  265.87   26.40
   1  -3  -7  224.78   30.70
   1  -3  -7  221.98   21.50
  -1   3   7  260.07   21.40
  -1   3   7  226.28   21.90
  -1   3   7  259.47   20.50
   0  -3  -7  196.68   31.20
   0  -3  -7  259.47   24.70
   0  -3  -7  243.08   32.60
   0   3   7  269.37   20.50
   0   3   7  238.98   21.10
   0   3   7  242.38   21.20
   0   3   7  200.98   22.10
  -1  -3  -7  270.37   36.10
  -1  -3  -7  232.48   32.10
   1   3   7  230.88   23.20
   1   3   7  260.67   23.60
   1   3   7  262.87   22.20
  -2  -3  -7  132.09   29.10
  -2  -3  -7  126.29   23.20
  -2  -3  -7  118.69   10.40
  -2  -3  -7  121.09   18.50
   2   3   7  109.89   15.60
   2   3   7  110.69   14.00
  -3  -3  -7  164.58   33.20
  -3  -3  -7  144.89   12.70
  -3  -3  -7  149.29   22.70
   3   3   7  129.39   18.60
  -4  -3  -7  403.76   33.60
  -4  -3  -7  427.76   33.50
  -4  -3  -7  382.06   41.10
  -4  -3  -7  376.76   41.20
   4   3   7  442.56   39.20
  -5  -3  -7  149.29   14.50
  -5  -3  -7  136.49   26.10
  -5  -3  -7  156.68   15.00
   5   3   7  156.48   14.70
   5   3   7  177.78   16.30
   5   3   7  167.98   16.50
   5   3   7  182.78   19.60
  -6  -3  -7   49.30    7.60
  -6  -3  -7   56.79    7.70
   6   3   7   63.79    9.40
   6   3   7   65.89    7.70
   6   3   7   40.40   13.70
   6   3   7   62.89   10.50
   6  -4  -7    6.90    6.40
   6  -4  -7    6.90    7.30
   6  -4  -7    3.30    9.60
  -6   4   7   -0.30    5.30
  -6   4   7    3.20    4.70
   5  -4  -7    2.90   10.10
   5  -4  -7   24.80    8.00
   5  -4  -7   10.00    8.40
   5  -4  -7   19.60    5.80
  -5   4   7   16.30    6.80
  -5   4   7   13.80    6.10
   4  -4  -7   51.99    9.20
   4  -4  -7   52.99    9.90
   4  -4  -7   57.09   11.80
   4  -4  -7   47.40    9.70
  -4   4   7   46.00    9.40
  -4   4   7   26.70    6.60
   3  -4  -7  573.24   56.39
   3  -4  -7  637.34   52.49
   3  -4  -7  648.64   52.49
  -3   4   7  612.54   51.49
   2  -4  -7   44.10    9.40
   2  -4  -7   62.89   17.20
  -2   4   7   34.80    8.10
  -2   4   7   22.80    5.90
   1  -4  -7   14.10   12.90
   1  -4  -7   12.00   11.20
  -1   4   7   16.00    4.60
  -1   4   7   11.10    6.00
   0  -4  -7  447.36   35.40
   0  -4  -7  448.16   46.40
   0  -4  -7  420.36   40.30
   0  -4  -7  465.25   48.50
   0   4   7  501.95   37.40
   0   4   7  422.36   36.70
   0   4   7  447.36   36.90
   0   4   7  357.56   37.60
  -1  -4  -7   12.10    2.30
  -1  -4  -7    5.20   13.50
  -1  -4  -7   10.20   13.40
   1   4   7   13.10    6.50
   1   4   7   13.50    6.70
   1   4   7   18.00    7.20
   1   4   7   17.00    7.10
  -2  -4  -7   26.30    4.70
  -2  -4  -7   24.10    9.20
  -2  -4  -7   36.00   17.60
  -2  -4  -7   36.20   15.00
   2   4   7   51.59   12.10
  -3  -4  -7  620.74   69.19
  -3  -4  -7  685.63   53.79
  -3  -4  -7  706.73   60.09
   3   4   7  668.73   58.49
  -4  -4  -7   23.00   13.60
  -4  -4  -7   34.40    6.00
   4   4   7   73.09   13.50
   4   4   7   55.69   10.30
   4   4   7   61.59    9.40
   4   4   7   40.90    7.40
  -5  -4  -7   12.30    4.10
  -5  -4  -7   16.10    3.90
   5   4   7   28.20    6.70
   5   4   7    5.30    5.70
   5   4   7   19.10    8.80
   5   4   7   21.80    4.50
  -6  -4  -7    7.30    3.40
   6   4   7   10.20    5.20
   6   4   7   11.40    3.30
   6  -5  -7    7.60    9.10
   6  -5  -7   21.10    6.40
  -6   5   7    9.60    4.10
  -6   5   7   12.80    5.10
   5  -5  -7  120.29   16.20
   5  -5  -7  114.49   16.90
   5  -5  -7   86.89   16.20
  -5   5   7  135.09   13.00
  -5   5   7  117.79   14.00
   4  -5  -7   42.30   10.30
   4  -5  -7   37.80    9.10
   4  -5  -7   27.00   11.70
  -4   5   7   45.90    9.20
  -4   5   7   48.30    7.90
   3  -5  -7  138.09   23.00
   3  -5  -7  106.09   16.00
   3  -5  -7  127.39   15.40
  -3   5   7  100.99   12.90
   2  -5  -7   50.09   14.90
   2  -5  -7   37.00    8.30
  -2   5   7   43.00    8.40
  -2   5   7   41.10    8.20
   1  -5  -7  666.33   61.39
   1  -5  -7  629.94   55.99
  -1   5   7  622.04   51.49
  -1   5   7  579.84   52.19
  -1   5   7  625.24   51.19
   0  -5  -7   16.60   14.40
   0  -5  -7    9.50   11.60
   0  -5  -7   14.00   15.20
   0  -5  -7   11.30    2.90
   0   5   7   18.30    7.90
   0   5   7    8.90    6.70
   0   5   7   15.50    6.20
   0   5   7   11.10    5.60
  -1  -5  -7  619.64   50.29
  -1  -5  -7  628.74   62.69
  -1  -5  -7  611.84   66.19
   1   5   7  678.73   53.59
   1   5   7  589.94   52.49
   1   5   7  656.43   52.39
  -2  -5  -7   49.80    5.60
  -2  -5  -7   89.09   27.90
  -2  -5  -7  109.69   34.80
   2   5   7   30.00    9.60
   2   5   7   31.70    9.50
  -3  -5  -7  180.08   25.60
  -3  -5  -7  152.48   13.10
   3   5   7  111.79   20.00
  -4  -5  -7   45.00   15.50
  -4  -5  -7   48.10    6.20
   4   5   7   31.60    9.50
   4   5   7   33.80    7.30
  -5  -5  -7  115.49   12.40
  -5  -5  -7  133.39   12.40
   5   5   7  148.79   15.00
   5   5   7  153.98   12.80
   5   5   7  137.19   16.20
   6   5   7   17.70    4.00
   6   5   7   19.70    5.80
   6  -6  -7   10.10    4.60
   6  -6  -7   10.70    7.80
  -6   6   7   12.30    4.90
  -6   6   7   20.40    5.80
   5  -6  -7   -3.10    7.00
   5  -6  -7   -8.80   10.40
  -5   6   7    4.30    6.00
  -5   6   7    0.00    4.10
   4  -6  -7   32.50    9.00
   4  -6  -7   31.70   11.70
  -4   6   7   34.80    8.80
  -4   6   7   44.20    7.90
   3  -6  -7  158.98   17.90
   3  -6  -7  156.88   21.20
  -3   6   7  148.29   16.00
  -3   6   7  155.08   17.70
  -3   6   7  161.68   16.20
   2  -6  -7   46.90   14.80
   2  -6  -7   97.39   20.50
  -2   6   7   57.19   13.30
  -2   6   7   69.29   10.40
  -2   6   7   64.89   10.40
   1  -6  -7  200.88   31.60
   1  -6  -7  180.98   25.30
   1  -6  -7  185.08   14.80
  -1   6   7  141.99   19.20
  -1   6   7  136.09   16.60
  -1   6   7  129.39   16.00
   0  -6  -7   38.90   14.70
   0  -6  -7   36.70   21.20
   0  -6  -7   27.70    5.10
   0  -6  -7   26.10    5.20
   0  -6  -7   33.00   18.70
   0   6   7   23.00    8.80
   0   6   7   23.10    8.00
   0   6   7   18.90    6.70
  -1  -6  -7  156.88   14.00
  -1  -6  -7  168.28   44.40
  -1  -6  -7  157.88   14.00
  -1  -6  -7  184.18   37.50
   1   6   7  186.38   19.40
   1   6   7  172.28   18.00
  -2  -6  -7  146.59   41.50
  -2  -6  -7   80.49    7.40
   2   6   7   47.00   12.70
   2   6   7   53.89   11.90
  -3  -6  -7  184.68   15.60
   3   6   7  195.78   24.70
   3   6   7  178.98   18.40
   3   6   7  174.78   19.50
  -4  -6  -7   40.70    5.80
   4   6   7   35.00   10.90
   4   6   7   44.40    9.50
   4   6   7   47.30   10.40
  -5  -6  -7    2.90    2.80
   5   6   7   -0.80    6.00
   5   6   7    7.10    7.00
   6   6   7   21.40    5.30
   5  -7  -7   63.79   14.40
   5  -7  -7   40.50    8.10
  -5   7   7   52.39   10.10
  -5   7   7   46.60    9.00
   4  -7  -7   -6.00    7.20
   4  -7  -7   13.60   10.80
  -4   7   7    2.80    7.20
  -4   7   7   -6.10    6.10
   3  -7  -7  254.37   27.40
   3  -7  -7  236.48   24.00
  -3   7   7  251.07   28.40
  -3   7   7  244.78   23.10
  -3   7   7  233.28   27.30
  -3   7   7  267.77   23.00
  -3   7   7  268.17   24.40
   2  -7  -7  474.35   39.70
   2  -7  -7  461.05   38.90
   2  -7  -7  466.75   40.90
  -2   7   7  409.86   41.50
  -2   7   7  440.86   38.30
  -2   7   7  462.25   38.80
  -2   7   7  451.15   41.60
  -2   7   7  464.75   38.20
   1  -7  -7  629.94   51.99
   1  -7  -7  593.14   58.89
   1  -7  -7  744.93   69.99
  -1   7   7  610.84   55.69
   0  -7  -7  137.59   13.10
   0  -7  -7  197.98   38.40
   0  -7  -7  129.59   23.90
   0  -7  -7  167.48   48.70
   0  -7  -7  134.49   13.60
   0   7   7  133.99   21.30
  -1  -7  -7  670.83   53.99
  -1  -7  -7  741.53   54.19
  -1  -7  -7  765.82   76.29
  -1  -7  -7  635.14   79.89
   1   7   7  625.54   56.59
   1   7   7  595.64   57.69
  -2  -7  -7  543.25   42.60
  -2  -7  -7  521.85   42.50
   2   7   7  525.45   45.00
   2   7   7  522.95   45.80
   2   7   7  522.45   48.30
  -3  -7  -7  288.37   22.80
   3   7   7  278.97   30.10
   3   7   7  252.47   25.70
   3   7   7  269.27   26.60
  -4  -7  -7   -0.50    2.50
   4   7   7   -2.70    7.80
   4   7   7    4.80    6.90
   4   7   7    3.30    7.50
   5   7   7   50.09    9.90
   5  -8  -7    0.50    6.20
   5  -8  -7    1.10    5.30
  -5   8   7    8.80    4.60
  -5   8   7   -1.60    4.80
   4  -8  -7   41.60    9.50
   4  -8  -7   33.20    7.00
  -4   8   7   39.20    7.60
  -4   8   7   44.20    9.10
   3  -8  -7   21.60   10.00
   3  -8  -7   20.90    7.30
  -3   8   7   29.00    8.10
  -3   8   7   17.00    6.90
  -3   8   7   24.70    7.10
   2  -8  -7   10.00    9.20
   2  -8  -7   15.20    6.90
  -2   8   7   10.20   11.90
  -2   8   7   16.20    6.50
  -2   8   7   -5.50   10.30
  -2   8   7    2.40    7.00
  -2   8   7   14.40    6.70
  -2   8   7    4.30   10.70
   1  -8  -7  213.98   19.70
   1  -8  -7  204.88   20.30
   1  -8  -7  234.88   22.50
   1  -8  -7  211.98   19.30
  -1   8   7  235.88   20.50
  -1   8   7  236.88   28.40
  -1   8   7  176.88   25.30
  -1   8   7  230.18   22.90
  -1   8   7  216.98   24.70
  -1   8   7  185.18   20.00
   0  -8  -7   47.20    8.90
   0  -8  -7   51.19   10.50
   0  -8  -7   37.30    7.60
   0  -8  -7   47.00    9.90
   0  -8  -7   33.80    8.00
   0   8   7   43.70    8.50
   0   8   7   41.70   10.40
   0   8   7   44.60    9.70
   0   8   7   53.79   14.20
  -1  -8  -7  235.08   20.80
  -1  -8  -7  244.48   21.20
   1   8   7  250.57   24.70
   1   8   7  273.77   25.60
   1   8   7  263.97   31.80
   1   8   7  224.68   27.80
  -2  -8  -7    9.30    4.00
  -2  -8  -7    7.80    3.30
   2   8   7    0.50   16.20
   2   8   7    6.80    7.90
   2   8   7   13.50    8.60
   2   8   7    4.80    7.70
  -3  -8  -7   37.20    6.20
  -3  -8  -7   32.10    5.40
   3   8   7   21.70    8.80
   3   8   7   18.60    8.30
  -4  -8  -7   43.30    6.00
   4   8   7   53.89   10.50
   4   8   7   30.10    8.40
   5   8   7    0.60    5.00
   4  -9  -7   26.10    5.10
   4  -9  -7    9.40    4.90
  -4   9   7   31.90    5.90
  -4   9   7   24.00    6.10
   3  -9  -7    2.70    7.30
   3  -9  -7    6.50    6.10
  -3   9   7   17.40    6.30
  -3   9   7    9.90    6.10
  -3   9   7   20.90    6.50
   2  -9  -7   33.10   11.60
   2  -9  -7   37.50    7.70
   2  -9  -7   25.90    9.20
  -2   9   7   23.60   12.10
  -2   9   7   19.00    7.50
  -2   9   7   21.60    6.50
  -2   9   7   19.80    7.40
  -2   9   7   30.00   11.30
   1  -9  -7   41.60    8.70
   1  -9  -7   41.00    8.20
   1  -9  -7   43.10    9.90
  -1   9   7   54.29    8.90
  -1   9   7   52.09   13.50
  -1   9   7   55.79    9.90
  -1   9   7   41.20   11.90
   0  -9  -7   30.50    6.10
   0  -9  -7   18.90    5.30
   0  -9  -7   21.00    4.90
   0  -9  -7   24.80    9.20
   0   9   7   10.80    7.60
   0   9   7   12.70   12.50
   0   9   7   29.30   10.70
   0   9   7   20.60    8.70
  -1  -9  -7   53.09    8.00
  -1  -9  -7   55.99    8.90
  -1  -9  -7   59.59    9.30
   1   9   7   32.30    9.50
   1   9   7   72.89   15.10
   1   9   7   74.29   14.50
   1   9   7   49.10   10.90
  -2  -9  -7   26.60    6.70
  -2  -9  -7   38.20    8.00
   2   9   7   34.50    9.30
   2   9   7   37.10    9.70
   2   9   7   32.90   12.60
   2   9   7   44.70   13.20
  -3  -9  -7   19.20    3.70
   3   9   7   13.00    7.80
   3   9   7    5.40    6.90
   4   9   7   45.80    8.90
   3 -10  -7   38.80    7.70
  -3  10   7   35.70    6.40
  -3  10   7   29.40    6.20
  -3  10   7   22.50    5.30
   2 -10  -7   21.30    6.10
   2 -10  -7   13.70    9.80
  -2  10   7   23.40    6.20
  -2  10   7   21.00    9.60
  -2  10   7   11.80    9.80
  -2  10   7    1.60    6.10
   1 -10  -7   42.50    9.00
   1 -10  -7   36.90    7.00
  -1  10   7   52.09   10.90
  -1  10   7   39.40   11.20
  -1  10   7   28.40   11.60
  -1  10   7   37.40    7.70
   0 -10  -7    5.40    4.20
   0 -10  -7   18.20    6.60
   0  10   7   12.90    7.00
   0  10   7    0.10   10.00
   0  10   7   11.90   10.90
   0  10   7    8.50    6.70
  -1 -10  -7   35.90    8.20
  -1 -10  -7   29.70    7.30
   1  10   7   69.69   11.60
   1  10   7   59.39   12.40
   1  10   7   24.50    7.70
   1  10   7   47.30   10.40
  -2 -10  -7   17.10    4.40
  -2 -10  -7   12.10    4.00
   2  10   7   26.80    8.60
   2  10   7   26.50    7.10
   2  10   7   19.10   10.50
   3  10   7   34.00    7.40
   3  10   7   32.70   10.00
   1 -11  -7   94.79   10.10
   1 -11  -7   99.09   14.40
  -1  11   7   87.39   14.10
  -1  11   7   95.59   10.00
  -1  11   7   83.59   14.40
   0 -11  -7  140.09   12.80
   0  11   7  103.89   12.30
   0  11   7  142.59   16.40
   0  11   7  122.19   13.60
   0  11   7  136.09   17.30
  -1 -11  -7   83.39   10.40
   1  11   7  109.29   16.30
   1  11   7  116.49   11.80
   1  11   7  107.19   16.20
   1  11   7   94.69   13.40
   1  11  -8   13.90    4.70
   1  11  -8    5.80    8.60
   1  11  -8   -1.40    5.80
  -1 -11   8   19.80    6.10
   0  11  -8    5.60    4.70
   0  11  -8    6.60    6.80
   0  11  -8   12.90    8.60
   0 -11   8    9.40    5.80
  -1  11  -8   15.00    7.10
  -1  11  -8   11.90    4.60
   3  10  -8   13.90    5.00
   3  10  -8   24.30    9.70
   2  10  -8   -1.20    6.00
  -2 -10   8  -18.10    8.70
  -2 -10   8  -13.70    6.60
   1  10  -8   68.49   15.30
   1  10  -8  111.79   13.60
   1  10  -8   79.29   19.70
  -1 -10   8  104.09   15.50
  -1 -10   8  122.39   16.50
   0  10  -8    2.50   12.80
   0  10  -8    7.50    6.30
   0  10  -8    3.70    9.90
   0 -10   8   15.50    8.20
   0 -10   8    8.90   10.00
  -1  10  -8   99.89   15.40
  -1  10  -8   95.59   13.90
   1 -10   8  116.69   14.50
  -2  10  -8    3.00    5.80
  -2  10  -8  -10.10    6.90
   3 -10   8    7.30    4.70
   4   9  -8   89.79   16.30
   4   9  -8   74.59   10.20
   3   9  -8   26.30    7.40
   3   9  -8   37.30   13.50
   3   9  -8   20.20   11.90
   2   9  -8   81.89   13.80
   2   9  -8   61.79   12.90
   2   9  -8  105.99   23.90
  -2  -9   8   36.40   11.40
  -2  -9   8   58.89   11.70
   1   9  -8  106.69   18.80
   1   9  -8  114.09   16.10
   1   9  -8  105.59   22.90
  -1  -9   8  105.89   15.10
  -1  -9   8  102.89   17.80
  -1  -9   8  127.79   17.40
   0   9  -8  250.97   25.00
   0   9  -8  228.78   27.60
   0   9  -8  234.98   24.60
   0   9  -8  289.57   35.70
   0  -9   8  285.27   26.70
   0  -9   8  246.18   24.80
   0  -9   8  257.07   26.50
  -1   9  -8   79.39   17.20
  -1   9  -8  119.09   15.40
  -1   9  -8  106.29   18.10
   1  -9   8  144.39   18.20
   1  -9   8   64.89   17.60
   1  -9   8  136.99   14.40
  -2   9  -8   47.30   13.10
  -2   9  -8   49.60   11.00
  -2   9  -8   58.09   12.10
  -2   9  -8   46.50   11.00
   2  -9   8   88.99   12.50
   2  -9   8   73.59   13.60
  -3   9  -8   30.30    7.10
  -3   9  -8   39.30   10.40
  -3   9  -8   42.50    7.10
   3  -9   8   19.20    6.70
   3  -9   8   51.59   10.40
  -4   9  -8   64.89    9.70
  -4   9  -8   77.69   11.10
   4  -9   8   75.99    9.10
   4   8  -8   20.50    7.20
   4   8  -8   40.40   12.40
   3   8  -8   60.69   14.30
   3   8  -8   83.79   16.20
   3   8  -8   33.00   13.30
  -3  -8   8   35.10    7.80
   2   8  -8   51.89    9.80
   2   8  -8   73.59   20.80
   2   8  -8   80.09   13.90
   2   8  -8   52.69   14.60
  -2  -8   8   59.99   12.50
  -2  -8   8   47.70   12.70
   1   8  -8   17.30    9.00
   1   8  -8   21.10   11.90
   1   8  -8   24.40    7.90
   1   8  -8    3.00   11.50
   1   8  -8    9.10   11.30
   1   8  -8   17.10   11.50
  -1  -8   8   19.20    8.30
  -1  -8   8   20.80    7.80
   0   8  -8  310.77   29.60
   0   8  -8  296.87   27.30
   0   8  -8  293.07   27.60
   0   8  -8  273.57   30.80
   0   8  -8  301.07   35.00
   0  -8   8  288.97   27.80
   0  -8   8  275.47   27.60
   0  -8   8  311.27   28.40
  -1   8  -8   29.20   10.10
  -1   8  -8   55.19   12.00
  -1   8  -8   43.10    7.90
  -1   8  -8   28.30   11.40
   1  -8   8   14.80    8.10
   1  -8   8   38.80    7.90
   1  -8   8   22.50    9.80
  -2   8  -8   61.79   13.40
  -2   8  -8   60.39   12.40
  -2   8  -8   60.89   12.50
   2  -8   8   58.39   13.20
   2  -8   8   59.89    9.90
  -3   8  -8   69.39   12.90
  -3   8  -8   95.29   13.60
  -3   8  -8   82.69   13.90
   3  -8   8   74.79   13.20
   3  -8   8   76.49   17.10
  -4   8  -8   37.20    9.50
  -4   8  -8   35.60    7.50
   4  -8   8   15.10    7.90
   5  -8   8   -4.60    9.00
   5   7  -8   16.70    4.10
   5   7  -8   20.10    7.10
   4   7  -8   36.70    8.40
   4   7  -8   22.10   13.40
   4   7  -8   11.30   12.00
  -4  -7   8   27.00    5.40
   3   7  -8  206.58   28.30
   3   7  -8  162.08   18.60
   3   7  -8  137.39   24.30
  -3  -7   8  108.09   15.60
   2   7  -8  587.44   47.60
   2   7  -8  519.85   48.30
   2   7  -8  558.04   49.10
   2   7  -8  531.35   44.80
  -2  -7   8  494.25   44.90
  -2  -7   8  512.95   44.10
   1   7  -8  115.09   19.20
   1   7  -8  104.99   20.90
   1   7  -8   99.29   22.40
   1   7  -8  158.78   22.40
   1   7  -8  134.39   16.80
   1   7  -8  132.89   15.70
  -1  -7   8  113.19   15.00
   0   7  -8  493.55   42.50
   0   7  -8  484.65   46.90
   0   7  -8  510.25   44.10
   0   7  -8  546.85   44.70
   0   7  -8  477.25   41.60
   0  -7   8  439.16   41.30
   0  -7   8  437.36   41.90
   0  -7   8  485.95   41.00
   0  -7   8  476.35   48.10
  -1   7  -8  147.59   19.50
  -1   7  -8  137.89   18.50
  -1   7  -8  118.79   16.50
  -1   7  -8  161.58   16.20
   1  -7   8  146.09   18.00
   1  -7   8  159.98   16.10
   1  -7   8  129.89   17.80
  -2   7  -8  667.53   50.39
  -2   7  -8  504.45   48.20
  -2   7  -8  605.84   48.60
   2  -7   8  597.74   51.09
   2  -7   8  545.55   48.50
  -3   7  -8  172.98   19.20
  -3   7  -8  178.88   19.30
   3  -7   8  189.58   23.40
   3  -7   8  175.18   18.80
  -4   7  -8   40.20    8.40
  -4   7  -8   37.90    8.30
   4  -7   8   44.00   12.70
  -5   7  -8   27.30    6.70
  -5   7  -8   12.40    6.00
   5  -7   8   14.70    8.20
   5  -7   8   12.50    6.40
   5   6  -8  148.69   17.50
   5   6  -8  132.99   13.70
   4   6  -8  131.69   17.00
   4   6  -8  108.09   23.60
   4   6  -8  104.99   12.80
   4   6  -8  104.69   19.30
   4   6  -8  129.49   26.40
  -4  -6   8  121.29   12.20
   3   6  -8   46.20   14.80
   3   6  -8   16.20    5.90
   3   6  -8   32.20    8.20
   3   6  -8   22.60   14.40
  -3  -6   8   28.40    6.80
   2   6  -8  947.01   81.29
  -2  -6   8  951.90   81.99
  -2  -6   8 1122.89   81.09
  -2  -6   8  997.30   82.79
   1   6  -8  218.78   22.20
   1   6  -8  223.88   21.00
  -1  -6   8  222.88   22.10
  -1  -6   8  231.98   23.30
  -1  -6   8  254.77   21.20
   0   6  -8   31.30    8.00
   0   6  -8   41.70   21.10
   0  -6   8   47.70   10.70
   0  -6   8   43.00    9.10
   0  -6   8   42.20   10.70
  -1   6  -8  255.07   21.80
  -1   6  -8  208.08   42.30
   1  -6   8  204.48   23.40
   1  -6   8  202.48   21.70
   1  -6   8  230.58   22.30
   1  -6   8  226.48   22.50
  -2   6  -8  915.41   75.89
  -2   6  -8 1017.40   75.29
  -2   6  -8  883.21   90.79
   2  -6   8  855.11   77.59
   2  -6   8  905.41   76.59
  -3   6  -8   25.90    8.20
  -3   6  -8   49.00   10.90
   3  -6   8   34.30   11.50
   3  -6   8   29.60    8.20
  -4   6  -8  134.19   16.60
  -4   6  -8  155.78   16.90
   4  -6   8  138.69   16.60
   4  -6   8  134.99   22.60
  -5   6  -8  143.09   15.60
   5  -6   8  127.49   19.70
   5  -6   8  145.79   15.40
  -6   6  -8   21.80    6.00
   6  -6   8   15.00    4.80
   6   5  -8   23.40    6.50
   6   5  -8   19.40    4.50
   5   5  -8    7.50    8.20
   5   5  -8   14.00    5.30
   5   5  -8   22.20    8.40
   5   5  -8   22.10   11.30
  -5  -5   8    5.90    5.40
   4   5  -8  106.69   20.60
   4   5  -8  176.08   18.90
   4   5  -8  126.99   27.10
   4   5  -8  159.88   26.70
   4   5  -8  167.98   16.10
   4   5  -8  169.88   23.10
  -4  -5   8  168.08   15.20
   3   5  -8   26.30    5.60
   3   5  -8   25.50    7.50
  -3  -5   8   28.60    6.80
  -3  -5   8   17.50    5.70
  -3  -5   8   23.20    5.60
   2   5  -8   31.10    7.70
   2   5  -8   27.90    5.60
  -2  -5   8   30.90    7.00
  -2  -5   8   40.10    9.00
   1   5  -8   37.20    7.40
   1   5  -8   26.40    6.70
  -1  -5   8   47.10    7.10
  -1  -5   8   51.49   10.00
  -1  -5   8   40.50    8.50
   0   5  -8    5.70    5.80
   0   5  -8   -0.40   15.90
   0  -5   8    6.30    6.40
   0  -5   8   -1.70    5.50
   0  -5   8    6.60    4.10
  -1   5  -8   38.30    7.70
  -1   5  -8   29.20   17.60
  -1   5  -8   49.99   11.40
   1  -5   8   28.70    8.00
   1  -5   8   42.90    8.30
   1  -5   8   29.90    8.60
   1  -5   8   29.40    8.90
  -2   5  -8   31.40    7.00
  -2   5  -8   36.50    8.00
  -2   5  -8   27.80   18.00
   2  -5   8   20.10    8.60
  -3   5  -8   22.30    8.10
  -3   5  -8   23.90   18.80
  -3   5  -8   26.20    8.80
   3  -5   8   21.10    9.90
  -4   5  -8  193.08   18.80
  -4   5  -8  126.89   21.50
  -4   5  -8  158.88   15.70
  -4   5  -8  167.98   18.00
   4  -5   8  190.58   18.50
   4  -5   8  204.08   24.30
  -5   5  -8   17.00    6.80
  -5   5  -8   18.70    6.50
  -5   5  -8    9.00    4.40
   5  -5   8   11.60    7.20
   5  -5   8   13.20    7.40
   5  -5   8   11.60   10.30
  -6   5  -8   22.20    4.70
  -6   5  -8   23.00    4.20
  -6   5  -8   28.40    6.40
   6  -5   8   27.70    5.70
   6  -5   8   20.00    5.20
   6  -5   8   29.40    8.10
   6   4  -8  121.99   14.60
   6   4  -8  133.79   14.70
   6   4  -8  118.09   12.00
  -6  -4   8   88.09   11.90
   5   4  -8    4.20    7.80
   5   4  -8    1.70    8.40
   5   4  -8   10.50    5.30
   5   4  -8   12.30   12.00
  -5  -4   8    9.10    5.10
  -5  -4   8    8.60    5.90
   4   4  -8   69.49   13.10
   4   4  -8   87.49   18.40
   4   4  -8   82.49   15.50
   4   4  -8   81.89   10.90
   4   4  -8   78.29   18.80
   4   4  -8   70.89   14.10
  -4  -4   8   85.69   10.00
   3   4  -8  296.17   27.80
   3   4  -8  293.77   26.40
  -3  -4   8  297.57   26.90
  -3  -4   8  297.27   26.40
  -3  -4   8  327.67   25.80
   2   4  -8   34.20    7.60
   2   4  -8   41.20    7.80
  -2  -4   8   50.39    7.80
  -2  -4   8   49.40    8.40
  -2  -4   8   72.79    9.00
   1   4  -8   46.10   15.50
   1   4  -8   60.79    7.50
   1   4  -8   57.69    8.00
  -1  -4   8   46.10    7.40
  -1  -4   8   36.00    6.30
  -1  -4   8   49.00    8.20
   0   4  -8  345.87   42.50
   0   4  -8  348.97   38.30
   0   4  -8  358.06   29.80
   0   4  -8  329.67   29.00
   0  -4   8  348.87   29.30
   0  -4   8  358.66   30.20
   0  -4   8  333.17   29.30
   0  -4   8  365.76   30.10
  -1   4  -8   43.80   10.60
  -1   4  -8   45.60    8.00
  -1   4  -8   44.50   17.30
   1  -4   8   66.89   10.70
   1  -4   8   70.59    9.10
   1  -4   8   68.79   10.10
  -2   4  -8   60.39    9.40
  -2   4  -8   34.90   17.00
  -2   4  -8   59.69   11.90
   2  -4   8   53.29    9.60
   2  -4   8   38.10    9.20
  -3   4  -8  269.37   42.50
  -3   4  -8  283.67   28.50
  -3   4  -8  300.37   26.50
  -3   4  -8  328.07   28.80
   3  -4   8  301.47   27.80
  -4   4  -8   72.09   12.90
  -4   4  -8   68.89    9.00
  -4   4  -8   93.89   12.60
  -4   4  -8   65.39   12.60
   4  -4   8   93.09   12.80
   4  -4   8  103.39   19.10
  -5   4  -8    5.90    4.20
  -5   4  -8    4.60    6.50
  -5   4  -8    2.80    6.40
   5  -4   8    4.50    7.50
   5  -4   8    6.50    7.30
   5  -4   8   10.10    9.60
  -6   4  -8  123.19   12.20
  -6   4  -8  105.99   12.90
  -6   4  -8  113.89   11.00
   6  -4   8   91.09   12.20
   6  -4   8  113.09   15.50
   6  -4   8  125.79   12.60
   6   3  -8    4.60    8.80
   6   3  -8   12.30    6.80
   6   3  -8    8.50    5.00
  -6  -3   8    3.10    5.40
   5   3  -8  184.08   20.00
   5   3  -8  178.48   19.40
   5   3  -8  189.28   25.60
   5   3  -8  173.58   16.60
  -5  -3   8  151.48   16.90
  -5  -3   8  136.79   16.00
   4   3  -8   57.69   10.30
   4   3  -8   53.89   13.40
   4   3  -8   70.29   10.70
   4   3  -8   84.79   20.20
   4   3  -8   75.89   18.60
   4   3  -8   74.39   15.40
   4   3  -8   57.79   11.80
  -4  -3   8   87.59   10.40
  -4  -3   8   67.99   10.40
  -4  -3   8   73.99   10.10
  -4  -3   8   91.19    9.90
   3   3  -8  163.38   17.50
   3   3  -8  172.88   16.70
  -3  -3   8  174.58   16.50
  -3  -3   8  170.28   16.20
  -3  -3   8  176.18   15.50
   2   3  -8 1316.47  112.09
   2   3  -8 1236.78  106.59
   2   3  -8 1397.96  106.19
  -2  -3   8 1335.37  106.39
  -2  -3   8 1409.66  106.09
  -2  -3   8 1237.98  105.69
  -2  -3   8 1351.06  106.09
   1   3  -8  421.56   34.00
   1   3  -8  391.36   34.20
   1   3  -8  404.56   35.10
   1   3  -8  424.96   42.40
   1   3  -8  356.96   42.10
  -1  -3   8  441.36   34.60
  -1  -3   8  443.56   34.30
  -1  -3   8  432.06   34.00
  -1  -3   8  402.06   34.10
   0   3  -8 2486.55  203.28
   0   3  -8 2285.07  197.48
   0   3  -8 2486.05  204.98
   0   3  -8 2627.34  198.08
   0  -3   8 2559.54  198.38
   0  -3   8 2508.55  198.28
   0  -3   8 2505.15  197.88
  -1   3  -8  408.26   40.80
  -1   3  -8  413.86   44.60
  -1   3  -8  434.06   34.70
   1  -3   8  414.96   33.80
   1  -3   8  343.77   34.20
   1  -3   8  397.06   34.00
  -2   3  -8 1255.67  101.79
  -2   3  -8 1288.77  110.69
   2  -3   8 1180.38  101.69
   2  -3   8 1298.67  101.39
  -3   3  -8  145.39   19.30
  -3   3  -8  169.88   19.90
  -3   3  -8  151.18   31.30
   3  -3   8  192.88   18.30
   3  -3   8  151.28   18.40
  -4   3  -8   87.19   13.40
  -4   3  -8   83.79    9.20
  -4   3  -8   73.69   15.10
  -4   3  -8   93.59   18.20
  -4   3  -8   89.09   15.60
   4  -3   8   43.90   12.10
   4  -3   8   76.09   14.30
   4  -3   8   62.49   15.60
   4  -3   8   58.69   14.10
   4  -3   8   80.59   13.70
  -5   3  -8  171.48   17.90
  -5   3  -8  138.49   16.60
  -5   3  -8  139.29   14.30
   5  -3   8  148.59   17.10
   5  -3   8  188.08   20.30
  -6   3  -8    7.70    4.20
  -6   3  -8    8.50    5.60
  -6   3  -8    4.60    6.00
   6  -3   8   11.00    5.30
   6  -3   8    5.30    5.80
   6  -3   8    7.30    7.90
  -7  -2   8   48.60    6.90
   6   2  -8   12.80    6.70
   6   2  -8   10.50    9.40
   6   2  -8    5.70    5.10
   6   2  -8   17.30    6.60
  -6  -2   8    4.20    4.60
  -6  -2   8    9.80    5.60
   5   2  -8  144.59   24.80
   5   2  -8  187.88   20.40
   5   2  -8  154.78   16.90
   5   2  -8  150.18   18.70
   5   2  -8  108.99   20.50
  -5  -2   8  179.98   16.90
  -5  -2   8  174.48   16.10
   4   2  -8    5.90    5.80
   4   2  -8   10.60    5.70
  -4  -2   8   13.10    5.30
  -4  -2   8   13.90    4.60
  -4  -2   8    7.40    4.10
  -4  -2   8    6.80    5.50
   3   2  -8   29.10    6.20
   3   2  -8   27.00    6.50
  -3  -2   8   37.60    7.90
  -3  -2   8   35.20    6.90
  -3  -2   8   37.60    6.30
   2   2  -8  287.37   26.20
   2   2  -8  290.07   25.90
   2   2  -8  293.67   33.20
   2   2  -8  294.27   30.30
  -2  -2   8  313.17   25.80
  -2  -2   8  309.47   25.30
  -2  -2   8  319.17   25.50
   1   2  -8  483.55   41.60
   1   2  -8  474.55   38.10
   1   2  -8  416.36   46.20
   1   2  -8  478.25   45.20
   1   2  -8  507.35   38.80
   1   2  -8  443.76   37.90
  -1  -2   8  467.85   38.10
  -1  -2   8  454.25   38.20
  -1  -2   8  468.15   38.00
   0   2  -8    0.90   10.70
   0   2  -8    3.30   11.00
   0  -2   8   13.70    4.00
   0  -2   8    6.00    4.00
   0  -2   8    4.50    3.50
  -1   2  -8  383.46   36.90
  -1   2  -8  475.05   46.70
  -1   2  -8  409.76   42.20
   1  -2   8  411.76   36.10
   1  -2   8  453.35   36.20
   1  -2   8  503.85   36.80
  -2   2  -8  294.87   26.10
  -2   2  -8  318.37   37.20
  -2   2  -8  254.37   25.50
   2  -2   8  243.58   24.20
   2  -2   8  251.57   24.20
   2  -2   8  298.07   24.70
  -3   2  -8   25.60   16.30
  -3   2  -8   45.30    9.90
  -3   2  -8   32.10    9.50
   3  -2   8   39.40    8.20
   3  -2   8   35.70    8.20
  -4   2  -8    3.10    9.00
  -4   2  -8   -0.80   10.10
   4  -2   8   -1.10    6.50
   4  -2   8   -1.20    7.80
   4  -2   8   13.60    8.40
  -5   2  -8  156.58   19.00
  -5   2  -8  158.48   17.80
  -5   2  -8  179.58   15.30
  -5   2  -8  165.78   15.60
  -5   2  -8  159.78   23.70
   5  -2   8  166.48   17.20
   5  -2   8  180.38   18.40
   5  -2   8  177.88   20.40
  -6   2  -8   15.60    5.70
  -6   2  -8    4.30    4.40
  -6   2  -8    4.50    6.80
   6  -2   8   10.10    4.80
   6  -2   8   11.20    5.90
   6  -2   8   18.50    8.00
  -7   2  -8   60.69    9.20
   7   1  -8    7.50    4.70
   7   1  -8   -4.70    4.80
  -7  -1   8    3.10    2.80
   6   1  -8   20.90    5.50
   6   1  -8    6.50    9.50
   6   1  -8   12.50    6.60
   6   1  -8   26.00    7.40
  -6  -1   8    9.50    4.70
  -6  -1   8   15.10    5.60
  -6  -1   8   10.10    6.90
   5   1  -8   15.50    6.80
   5   1  -8   11.20    7.20
   5   1  -8   16.80    5.90
   5   1  -8    9.30   11.80
   5   1  -8    4.10    8.80
  -5  -1   8   17.70    5.40
  -5  -1   8   13.00    6.00
  -5  -1   8   13.60    4.80
   4   1  -8   53.49   11.10
   4   1  -8   56.19   11.00
  -4  -1   8   87.09    9.60
  -4  -1   8   63.09   10.20
  -4  -1   8   58.59    8.80
  -4  -1   8   70.09    9.40
  -4  -1   8   58.09   11.20
   3   1  -8  648.84   55.09
   3   1  -8  685.83   55.29
   3   1  -8  669.73   58.49
  -3  -1   8  663.33   54.09
  -3  -1   8  659.83   54.59
  -3  -1   8  676.53   54.99
  -3  -1   8  690.83   55.39
   2   1  -8  245.48   21.70
   2   1  -8  257.77   28.80
   2   1  -8  286.07   26.30
   2   1  -8  274.17   21.60
  -2  -1   8  225.18   20.60
  -2  -1   8  234.08   20.80
  -2  -1   8  242.48   21.30
  -2  -1   8  221.78   21.40
   1   1  -8 3043.60  260.27
   1   1  -8 3307.47  262.07
   1   1  -8 3706.53  265.77
   1   1  -8 3061.79  260.07
  -1  -1   8 3063.29  262.57
  -1  -1   8 3552.04  260.27
  -1  -1   8 3211.58  260.17
  -1  -1   8 3338.17  260.17
   0   1  -8  553.34   48.90
   0   1  -8  591.64   53.39
   0   1  -8  559.64   54.49
   0  -1   8  596.14   46.70
   0  -1   8  631.54   46.80
   0  -1   8  526.05   49.10
   0  -1   8  573.94   46.80
  -1   1  -8 3193.98  250.27
  -1   1  -8 3112.89  246.38
  -1   1  -8 3188.88  252.27
   1  -1   8 3288.87  245.78
   1  -1   8 2730.93  245.68
   1  -1   8 3044.50  248.58
   1  -1   8 3133.59  245.78
  -2   1  -8  202.48   23.80
  -2   1  -8  245.88   35.70
  -2   1  -8  252.87   25.20
   2  -1   8  259.57   22.70
   2  -1   8  272.47   21.90
   2  -1   8  229.68   21.80
  -3   1  -8  618.74   64.79
  -3   1  -8  698.73   55.49
  -3   1  -8  670.53   55.39
   3  -1   8  685.13   55.79
   3  -1   8  561.24   54.09
   3  -1   8  634.94   53.69
  -4   1  -8   50.59   13.10
  -4   1  -8   47.90   12.10
  -4   1  -8   71.69    8.00
   4  -1   8   75.69   13.90
  -5   1  -8   15.10    4.00
  -5   1  -8   14.50   12.00
  -5   1  -8   16.30    4.40
  -5   1  -8   24.80    4.90
  -5   1  -8   24.80    8.20
   5  -1   8    6.70    8.30
   5  -1   8   13.00    3.60
   5  -1   8   15.60    8.10
   5  -1   8   11.80    6.10
   5  -1   8   10.70    7.50
  -6   1  -8   14.00    7.60
  -6   1  -8   12.10    3.20
  -6   1  -8   15.00    4.70
   6  -1   8   21.90    6.10
   6  -1   8   25.40    8.20
   6  -1   8   17.00    6.80
   6  -1   8   23.50    5.20
  -7   1  -8    3.50    3.80
   7  -1   8   -0.70    2.90
   7   0  -8    1.10    5.10
   7   0  -8    2.20    4.60
  -7   0   8   -1.10    2.30
   6   0  -8   35.30   10.40
   6   0  -8   52.89   11.70
   6   0  -8   42.50    8.70
  -6   0   8   41.40    8.60
  -6   0   8   42.40    8.40
  -6   0   8   44.00    8.80
   5   0  -8  639.44   53.49
   5   0  -8  598.44   54.79
   5   0  -8  688.33   54.29
  -5   0   8  639.34   52.99
  -5   0   8  647.44   52.89
  -5   0   8  647.24   52.99
  -5   0   8  653.53   52.69
   4   0  -8   34.90    7.80
   4   0  -8   47.10   10.30
  -4   0   8   38.90    7.80
  -4   0   8   34.00    7.80
  -4   0   8   43.30    9.00
  -4   0   8   40.70   10.10
  -4   0   8   35.90    6.60
   3   0  -8  251.87   23.00
   3   0  -8  269.27   27.70
   3   0  -8  244.58   23.40
  -3   0   8  257.27   22.20
  -3   0   8  240.48   21.90
  -3   0   8  258.07   23.60
  -3   0   8  276.47   22.80
   2   0  -8  246.68   30.90
   2   0  -8  253.67   23.90
   2   0  -8  278.47   23.90
   2   0  -8  269.77   27.90
  -2   0   8  283.57   22.90
  -2   0   8  282.87   23.30
  -2   0   8  275.47   23.80
   1   0  -8 4064.99  347.47
   1   0  -8 4722.93  349.57
  -1   0   8 4567.54  347.47
  -1   0   8 4409.56  349.67
  -1   0   8 4206.98  347.67
   0   0  -8  119.19   16.00
   0   0  -8  138.09   26.70
   0   0  -8  145.89   24.40
   0   0   8  110.89   14.60
   0   0   8  128.89   12.60
   0   0   8  135.39   12.30
   0   0   8  131.59   12.30
   0   0   8  109.39   11.90
   0   0   8  124.69   11.80
  -1   0  -8 4501.35  351.06
  -1   0  -8 4533.55  348.67
  -1   0  -8 4194.48  344.67
   1   0   8 4171.68  344.17
   1   0   8 4183.58  344.17
   1   0   8 4427.16  346.17
   1   0   8 3926.91  344.07
   1   0   8 4827.32  344.07
  -2   0  -8  219.88   25.70
  -2   0  -8  314.67   40.20
  -2   0  -8  275.37   26.70
   2   0   8  271.67   23.50
   2   0   8  253.77   24.20
  -3   0  -8  263.17   21.20
  -3   0  -8  221.78   38.60
  -3   0  -8  254.17   27.60
  -3   0  -8  253.47   26.90
   3   0   8  259.97   24.10
  -4   0  -8   21.00   11.40
  -4   0  -8   46.30   12.40
  -4   0  -8   38.60    6.40
  -4   0  -8   40.10    6.30
   4   0   8   40.90    9.80
  -5   0  -8  687.23   55.69
  -5   0  -8  574.14   61.19
  -5   0  -8  704.23   55.79
  -5   0  -8  781.92   55.89
  -5   0  -8  617.94   57.49
  -5   0  -8  695.23   55.79
   5   0   8  751.82   58.19
   5   0   8  634.24   56.69
   5   0   8  688.63   56.79
   5   0   8  705.63   55.59
  -6   0  -8   45.40    6.60
  -6   0  -8   37.40    7.30
  -6   0  -8   48.90    9.00
  -6   0  -8   39.80    6.70
   6   0   8   45.30    8.60
   6   0   8   44.00   10.50
   6   0   8   51.19    9.20
   6   0   8   39.90    6.10
  -7   0  -8    3.90    2.80
  -7   0  -8   -3.50    3.90
   7   0   8    3.00    3.10
   7   0   8    0.20    5.70
   7  -1  -8    6.60    5.60
   7  -1  -8    8.50    4.30
  -7   1   8    4.70    6.20
   6  -1  -8   24.70    6.60
   6  -1  -8   18.80    8.10
  -6   1   8   30.40    7.40
  -6   1   8   20.00    5.80
  -6   1   8   23.50    7.20
   5  -1  -8   17.70    6.40
   5  -1  -8   15.70    7.70
   5  -1  -8   10.60    8.70
   5  -1  -8   11.70    5.70
  -5   1   8    6.40    5.30
  -5   1   8    1.80    4.60
  -5   1   8   18.40    7.50
  -5   1   8    9.30    5.30
   4  -1  -8   58.69   12.40
   4  -1  -8   62.19   12.30
  -4   1   8   47.50   11.00
  -4   1   8   53.99    9.50
  -4   1   8   62.19    9.40
  -4   1   8   53.39    9.00
   3  -1  -8  574.84   50.09
   3  -1  -8  577.04   53.09
   3  -1  -8  599.34   49.80
  -3   1   8  618.84   49.10
  -3   1   8  613.64   48.60
  -3   1   8  551.44   48.40
  -3   1   8  632.14   49.80
   2  -1  -8  199.38   30.50
   2  -1  -8  209.88   22.10
   2  -1  -8  264.27   26.80
   2  -1  -8  226.58   22.40
  -2   1   8  271.37   22.00
  -2   1   8  239.08   20.60
  -2   1   8  286.07   21.30
   1  -1  -8 2980.90  239.18
   1  -1  -8 3064.09  239.08
   1  -1  -8 3201.88  241.38
  -1   1   8 3126.19  238.88
  -1   1   8 2711.33  238.58
   0  -1  -8  575.54   49.60
   0  -1  -8  583.44   57.79
   0  -1  -8  575.64   56.49
   0   1   8  613.24   47.50
   0   1   8  582.34   47.30
   0   1   8  510.25   46.60
   0   1   8  633.64   47.10
  -1  -1  -8 3018.00  247.48
  -1  -1  -8 3182.58  255.27
  -1  -1  -8 2981.40  252.27
   1   1   8 3161.38  246.38
   1   1   8 3060.29  247.08
   1   1   8 3331.47  246.78
   1   1   8 3025.50  246.98
  -2  -1  -8  229.28   33.40
  -2  -1  -8  319.37   42.00
  -2  -1  -8  248.28   25.70
   2   1   8  241.08   21.50
   2   1   8  216.88   22.50
   2   1   8  223.48   22.20
  -3  -1  -8  600.14   53.59
  -3  -1  -8  542.45   64.19
  -3  -1  -8  626.44   48.80
  -3  -1  -8  610.04   53.29
   3   1   8  620.34   51.79
   3   1   8  629.44   50.99
  -4  -1  -8   60.19    7.40
  -4  -1  -8   57.59   13.80
  -4  -1  -8   38.20   13.70
  -4  -1  -8   57.19    7.50
   4   1   8   65.09   12.80
  -5  -1  -8    8.80    3.80
  -5  -1  -8   16.90   12.90
  -5  -1  -8   11.20    4.00
  -5  -1  -8    9.30    3.90
   5   1   8    4.40    6.00
   5   1   8   18.90    8.40
   5   1   8    5.30    5.90
   5   1   8   14.90    3.80
  -6  -1  -8   30.60    6.00
  -6  -1  -8   31.10    6.30
  -6  -1  -8   27.80    7.60
   6   1   8   26.30    8.40
   6   1   8   21.90    6.70
   6   1   8   26.60    6.20
   6   1   8   26.30    5.70
  -7  -1  -8    3.50    1.90
  -7  -1  -8    5.50    2.90
   7   1   8    7.10    2.30
   7   1   8    4.10    3.40
   7  -2  -8   24.50    7.50
   6  -2  -8   12.80    5.60
   6  -2  -8    7.10    8.00
   6  -2  -8   16.50    9.00
  -6   2   8    6.80    5.30
  -6   2   8    7.60    3.30
  -6   2   8   12.90    6.10
   5  -2  -8  191.18   20.40
   5  -2  -8  205.48   22.60
   5  -2  -8  198.28   21.60
   5  -2  -8  195.78   19.60
  -5   2   8  195.98   18.00
  -5   2   8  181.68   18.60
  -5   2   8  213.48   20.10
   4  -2  -8   12.60    6.90
   4  -2  -8    8.20    8.20
  -4   2   8    8.00    6.10
  -4   2   8    8.00    4.60
  -4   2   8    9.40    4.90
   3  -2  -8   29.40    7.80
   3  -2  -8   11.60    6.30
   3  -2  -8   20.60   13.70
  -3   2   8   12.60    5.50
  -3   2   8   17.70    4.70
   2  -2  -8  288.67   39.10
   2  -2  -8  316.17   27.70
   2  -2  -8  335.17   27.80
   2  -2  -8  296.57   32.60
  -2   2   8  321.17   27.20
  -2   2   8  311.67   26.30
   1  -2  -8  401.16   35.80
   1  -2  -8  425.46   46.30
   1  -2  -8  434.16   40.00
  -1   2   8  426.66   35.90
  -1   2   8  469.35   35.40
   0  -2  -8   15.40   14.70
   0  -2  -8   10.10   13.20
   0  -2  -8   18.60    9.70
   0   2   8   23.70    5.20
   0   2   8   28.30    6.10
   0   2   8   32.20    7.00
  -1  -2  -8  474.45   49.50
  -1  -2  -8  467.35   45.90
  -1  -2  -8  466.75   39.00
   1   2   8  416.16   37.30
   1   2   8  359.46   37.00
   1   2   8  461.55   36.50
  -2  -2  -8  308.47   24.90
  -2  -2  -8  324.57   30.70
  -2  -2  -8  303.37   43.00
  -2  -2  -8  286.87   36.40
   2   2   8  297.07   26.90
   2   2   8  323.87   28.70
   2   2   8  300.57   27.40
  -3  -2  -8    5.40   18.60
  -3  -2  -8   21.50   10.00
  -3  -2  -8   21.20    4.40
  -3  -2  -8    8.60    9.50
   3   2   8   24.20    9.40
   3   2   8   22.70    6.80
  -4  -2  -8   -4.00   11.60
  -4  -2  -8   11.90    3.70
  -4  -2  -8   14.20    3.50
  -4  -2  -8   11.60   11.90
   4   2   8   13.70    8.60
  -5  -2  -8  162.68   17.90
  -5  -2  -8  218.48   17.90
  -5  -2  -8  196.88   17.60
  -5  -2  -8  153.18   28.90
   5   2   8  209.78   19.10
   5   2   8  194.98   17.70
   5   2   8  215.88   19.40
   5   2   8  256.37   22.20
  -6  -2  -8   10.00    3.40
  -6  -2  -8    8.20    3.70
   6   2   8    7.20    3.50
   6   2   8   15.00    5.20
   6   2   8    9.40    7.50
   6   2   8    9.60    5.90
  -7  -2  -8   37.60    7.00
   7   2   8   36.70    5.40
   7   2   8   32.00    5.80
   6  -3  -8   -7.00    5.50
   6  -3  -8    2.60    9.00
   6  -3  -8    9.40    7.90
   6  -3  -8    0.10    4.70
  -6   3   8    6.00    5.40
  -6   3   8   -4.60    5.00
   5  -3  -8  184.48   19.20
   5  -3  -8  164.98   21.30
   5  -3  -8  187.58   20.20
   5  -3  -8  152.68   22.50
  -5   3   8  201.58   19.00
  -5   3   8  215.98   18.30
   4  -3  -8   49.99   10.70
   4  -3  -8   53.29   10.30
   4  -3  -8   58.89   18.20
   4  -3  -8   60.49   13.10
  -4   3   8   60.39   10.10
  -4   3   8   52.79    9.60
  -4   3   8   44.20   10.30
   3  -3  -8  190.78   19.90
   3  -3  -8  151.88   26.30
   3  -3  -8  186.98   20.00
  -3   3   8  212.18   18.80
   2  -3  -8 1430.16  111.99
   2  -3  -8 1409.46  108.49
   2  -3  -8 1401.06  108.59
  -2   3   8 1257.07  108.09
  -2   3   8 1260.47  107.39
   1  -3  -8  412.86   39.60
   1  -3  -8  421.76   44.50
  -1   3   8  455.55   35.50
  -1   3   8  407.76   34.80
   0  -3  -8 2384.76  199.28
   0  -3  -8 2429.46  203.78
   0  -3  -8 2489.85  205.18
   0   3   8 2513.35  197.08
   0   3   8 2474.65  197.48
   0   3   8 2597.84  197.68
  -1  -3  -8  420.46   46.00
  -1  -3  -8  450.45   35.40
  -1  -3  -8  425.16   49.90
   1   3   8  443.86   36.90
   1   3   8  473.45   38.20
   1   3   8  423.66   37.70
  -2  -3  -8 1302.47  106.49
  -2  -3  -8 1334.07  111.19
  -2  -3  -8 1307.67  102.99
  -2  -3  -8 1353.76  115.99
   2   3   8 1153.18  105.69
   2   3   8 1338.57  104.79
  -3  -3  -8  201.58   17.50
  -3  -3  -8  220.68   27.20
  -3  -3  -8  223.98   17.40
  -3  -3  -8  179.58   39.00
   3   3   8  181.18   23.10
  -4  -3  -8   37.70   14.70
  -4  -3  -8   47.60    6.90
  -4  -3  -8   41.70    6.40
  -4  -3  -8   22.00   13.00
   4   3   8   62.29   13.50
   4   3   8   53.49   10.80
   4   3   8   62.59   15.40
   4   3   8   73.69   10.00
  -5  -3  -8  206.08   17.60
  -5  -3  -8  212.18   17.50
   5   3   8  179.38   19.50
   5   3   8  185.58   21.90
   5   3   8  205.68   18.80
   5   3   8  190.18   17.40
  -6  -3  -8    2.10    2.90
  -6  -3  -8    0.90    3.20
   6   3   8   17.30    7.40
   6   3   8    2.00    5.10
   6   3   8    8.80    5.10
   6   3   8   10.20    3.20
   6  -4  -8   89.59   12.60
   6  -4  -8   97.39   15.90
   6  -4  -8   96.49   14.00
  -6   4   8  112.99   11.10
  -6   4   8  100.49   11.20
   5  -4  -8    6.50    5.20
   5  -4  -8    3.10    8.40
   5  -4  -8    3.90   10.10
   5  -4  -8    5.70    7.50
  -5   4   8    9.90    5.60
  -5   4   8    6.70    6.50
   4  -4  -8   97.69   15.90
   4  -4  -8   73.69   11.60
   4  -4  -8   95.59   14.70
   4  -4  -8   88.49   18.60
  -4   4   8   92.69   11.30
  -4   4   8  108.59   12.60
   3  -4  -8  248.58   23.90
   3  -4  -8  230.08   30.70
   3  -4  -8  234.98   23.80
  -3   4   8  246.28   22.60
   2  -4  -8   48.30    9.40
   2  -4  -8   33.50    7.60
   2  -4  -8   47.60   13.90
  -2   4   8   38.20    8.00
   1  -4  -8   61.59   22.20
   1  -4  -8   49.80   14.00
  -1   4   8   64.89    9.00
  -1   4   8   59.59    8.70
  -1   4   8   59.29   11.70
   0  -4  -8  356.36   35.50
   0  -4  -8  409.26   43.60
   0  -4  -8  366.66   43.80
   0  -4  -8  366.86   30.60
   0   4   8  405.46   32.70
   0   4   8  370.86   32.30
  -1  -4  -8   68.59    6.00
  -1  -4  -8   75.69   27.60
  -1  -4  -8   69.99   23.80
   1   4   8   42.70    8.80
   1   4   8   41.80   11.20
   1   4   8   52.89    9.60
  -2  -4  -8   70.79   28.80
  -2  -4  -8   38.90    5.10
  -2  -4  -8   34.00   10.40
   2   4   8   35.00    7.90
   2   4   8   35.00    9.60
  -3  -4  -8  313.27   44.40
  -3  -4  -8  288.27   23.20
  -3  -4  -8  283.97   23.20
  -3  -4  -8  276.67   32.80
   3   4   8  229.38   28.60
  -4  -4  -8   98.99   10.00
  -4  -4  -8   92.19   19.50
  -4  -4  -8  102.99   10.00
   4   4   8   95.69   10.50
   4   4   8  106.09   12.40
   4   4   8  112.29   16.00
   4   4   8   96.19   13.30
  -5  -4  -8    5.00    3.70
  -5  -4  -8    8.80    3.70
   5   4   8    7.30    5.80
   5   4   8    9.70    8.70
   5   4   8   11.10    3.90
  -6  -4  -8   92.29    9.70
  -6  -4  -8   96.59    9.80
   6   4   8  121.99   11.80
   6   4   8  107.19   12.90
   6   4   8  106.39    9.60
   6  -5  -8   23.70    9.00
   6  -5  -8    8.50    5.60
  -6   5   8    5.90    4.80
  -6   5   8   10.90    3.80
   5  -5  -8   41.40    8.60
   5  -5  -8   11.50    7.90
   5  -5  -8   11.50   11.00
  -5   5   8   33.60    7.20
  -5   5   8   26.00    5.80
   4  -5  -8  177.58   19.10
   4  -5  -8  105.19   21.40
   4  -5  -8  143.99   19.50
  -4   5   8  167.28   16.30
  -4   5   8  178.88   16.20
   3  -5  -8   19.50   16.00
   3  -5  -8   14.00    7.80
   3  -5  -8   34.90    8.50
  -3   5   8   28.00    6.50
   2  -5  -8   38.80   11.20
   2  -5  -8   45.70   15.30
  -2   5   8   34.10   12.70
  -2   5   8   46.40    8.50
   1  -5  -8   54.09   15.30
   1  -5  -8   99.29   23.90
  -1   5   8   57.99    8.90
  -1   5   8   33.00    9.30
  -1   5   8   56.49    9.50
   0  -5  -8   11.30    2.90
   0  -5  -8   17.70   15.10
   0  -5  -8    5.70   11.00
   0  -5  -8   24.30   15.20
   0   5   8   12.10    5.80
   0   5   8    8.20    6.70
   0   5   8    4.30    7.40
  -1  -5  -8   87.19   26.50
  -1  -5  -8   52.69    6.00
  -1  -5  -8   39.10   18.40
   1   5   8   68.69   10.20
   1   5   8   55.89   10.90
   1   5   8   55.99   11.90
  -2  -5  -8  115.29   35.70
  -2  -5  -8   48.70    5.50
  -2  -5  -8   39.70    5.40
  -2  -5  -8   48.60   12.80
   2   5   8   49.90   13.50
  -3  -5  -8   23.30    4.00
  -3  -5  -8   24.50    5.10
  -3  -5  -8   42.50   12.80
   3   5   8   30.10   11.20
  -4  -5  -8  146.09   28.70
  -4  -5  -8  184.28   15.20
  -4  -5  -8  166.78   15.20
   4   5   8  174.68   20.30
   4   5   8  167.68   17.60
  -5  -5  -8   39.60    5.90
  -5  -5  -8   38.30    6.00
   5   5   8   30.60    8.50
   5   5   8   31.30    7.30
  -6  -5  -8   12.70    2.70
   6   5   8   12.50    2.70
   6   5   8   13.60    5.30
   6  -6  -8   13.90    5.10
   6  -6  -8   10.40    7.80
   5  -6  -8   87.79   19.10
   5  -6  -8  109.89   14.30
  -5   6   8  110.99   11.30
  -5   6   8  122.29   12.90
   4  -6  -8  130.69   20.80
   4  -6  -8  112.59   16.50
  -4   6   8  110.19   15.90
  -4   6   8  129.29   14.40
  -4   6   8  106.49   14.70
   3  -6  -8   48.10    8.70
   3  -6  -8   48.00   11.90
  -3   6   8   37.50    7.40
  -3   6   8   39.60    8.80
  -3   6   8   45.40    7.80
   2  -6  -8  896.21   76.09
  -2   6   8  881.51   71.89
  -2   6   8  827.82   70.79
  -2   6   8  854.21   70.49
   1  -6  -8  313.77   38.50
   1  -6  -8  240.08   20.50
   1  -6  -8  220.78   28.70
  -1   6   8  225.18   22.00
  -1   6   8  204.18   24.60
  -1   6   8  233.68   22.80
   0  -6  -8   83.79   28.50
   0  -6  -8   47.60    6.80
   0  -6  -8  125.69   39.20
   0  -6  -8   41.30    6.60
   0  -6  -8   52.89   15.00
   0   6   8   43.50   10.00
   0   6   8   41.20   11.10
  -1  -6  -8  255.37   21.30
  -1  -6  -8  261.67   21.40
  -1  -6  -8  316.97   43.50
  -1  -6  -8  288.07   49.70
   1   6   8  196.28   25.00
   1   6   8  256.37   25.90
  -2  -6  -8 1171.48   99.09
  -2  -6  -8 1072.29   81.29
  -2  -6  -8 1007.50   81.29
  -2  -6  -8  952.90  101.19
   2   6   8  907.41   85.19
  -3  -6  -8   44.50    5.80
  -3  -6  -8   43.00    5.90
   3   6   8   52.59    9.80
   3   6   8   55.29   17.20
   3   6   8   54.49   10.60
  -4  -6  -8  112.39   11.10
  -4  -6  -8  110.59   11.00
   4   6   8  155.48   20.80
   4   6   8  136.19   16.00
   4   6   8  140.19   14.80
  -5  -6  -8  123.69   11.40
   5   6   8  142.89   14.50
   5   6   8  125.89   15.20
   6   6   8   16.80    5.30
   5  -7  -8   12.20    9.00
   5  -7  -8   11.40    6.20
  -5   7   8   12.70    5.80
  -5   7   8   17.10    5.90
   4  -7  -8   20.40    8.40
   4  -7  -8   15.90   10.60
  -4   7   8   33.10    7.90
  -4   7   8   31.80    6.90
  -4   7   8   28.80    7.20
   3  -7  -8   74.79   17.30
   3  -7  -8   97.39   14.00
  -3   7   8  103.89   12.90
  -3   7   8  126.29   14.90
  -3   7   8  103.19   13.00
   2  -7  -8  490.15   43.70
   2  -7  -8  507.35   41.70
  -2   7   8  526.75   41.40
  -2   7   8  491.85   41.60
  -2   7   8  534.45   41.20
  -2   7   8  428.96   43.60
  -2   7   8  446.46   44.00
   1  -7  -8  170.98   16.40
   1  -7  -8  127.59   14.50
   1  -7  -8  145.79   18.50
   1  -7  -8  165.98   14.60
  -1   7   8  162.68   18.50
  -1   7   8  154.98   22.40
  -1   7   8  145.49   19.60
  -1   7   8  143.49   15.50
  -1   7   8  139.19   16.10
   0  -7  -8  579.64   68.49
   0  -7  -8  417.36   43.80
   0  -7  -8  533.95   42.30
   0  -7  -8  506.35   42.10
   0  -7  -8  437.36   48.30
   0  -7  -8  569.94   64.19
   0  -7  -8  540.65   42.00
   0   7   8  533.25   45.60
   0   7   8  600.14   47.00
   0   7   8  431.86   44.60
   0   7   8  621.74   51.09
  -1  -7  -8  165.78   14.80
  -1  -7  -8  182.88   15.20
   1   7   8  169.98   26.70
   1   7   8  182.68   23.90
   1   7   8  163.28   18.90
   1   7   8  135.59   20.10
  -2  -7  -8  558.24   45.20
  -2  -7  -8  563.34   45.30
   2   7   8  538.35   50.89
   2   7   8  582.44   47.70
   2   7   8  568.14   48.20
  -3  -7  -8  119.49   10.20
   3   7   8   96.49   16.10
   3   7   8   95.99   15.00
   3   7   8  104.99   19.30
  -4  -7  -8   35.40    5.40
  -4  -7  -8   33.80    4.90
   4   7   8   32.90    9.70
   4   7   8   22.30    7.80
   4   7   8   37.20    8.80
   5   7   8    8.50    6.00
   4  -8  -8   24.80    6.80
   4  -8  -8   19.50    8.20
  -4   8   8   17.00    6.70
  -4   8   8   18.30    6.80
  -4   8   8   23.00    6.40
   3  -8  -8   70.19   11.90
   3  -8  -8   67.39   15.90
  -3   8   8   48.40   16.00
  -3   8   8   74.69   11.00
  -3   8   8   58.89    9.80
  -3   8   8   66.59   10.90
   2  -8  -8   44.70   10.80
   2  -8  -8   48.40    8.50
  -2   8   8   30.70   13.10
  -2   8   8   36.80    7.80
  -2   8   8   42.40    8.40
  -2   8   8   34.80    7.90
  -2   8   8   29.10   11.80
   1  -8  -8   44.10    9.90
   1  -8  -8   40.70    8.50
   1  -8  -8   41.40    7.80
   1  -8  -8   49.70   11.40
  -1   8   8   40.90    7.50
  -1   8   8   32.00    9.00
  -1   8   8   40.50    7.90
  -1   8   8   16.80   12.80
  -1   8   8   38.10   11.10
   0  -8  -8  266.17   27.30
   0  -8  -8  334.67   29.20
   0  -8  -8  315.07   26.60
   0  -8  -8  302.47   26.80
   0  -8  -8  318.97   26.40
   0   8   8  292.97   29.70
   0   8   8  311.07   29.30
   0   8   8  357.96   34.50
   0   8   8  329.87   27.90
  -1  -8  -8   46.40    7.00
  -1  -8  -8   51.79    7.00
  -1  -8  -8   34.10    7.80
   1   8   8   55.79   17.90
   1   8   8   31.50   14.10
   1   8   8   26.40    9.40
   1   8   8   29.80    9.20
  -2  -8  -8   43.90    6.40
  -2  -8  -8   33.40    7.10
   2   8   8   65.49   13.10
   2   8   8   34.10    9.60
   2   8   8   51.39   10.10
  -3  -8  -8   64.09    7.60
  -3  -8  -8   73.09    8.10
   3   8   8   70.09   16.00
   3   8   8   68.49   13.50
  -4  -8  -8   37.20    5.00
   4   8   8   29.60    8.00
   4   8   8   28.80    7.80
   5   8   8   -4.00    7.90
  -4   9   8   65.99    8.90
  -4   9   8   70.79    9.10
   3  -9  -8   20.70    7.20
   3  -9  -8   34.70    6.70
  -3   9   8   27.00    6.40
  -3   9   8   19.50    6.60
  -3   9   8   32.70    6.60
   2  -9  -8   42.00    8.20
   2  -9  -8   36.70    9.80
  -2   9   8   41.90    8.10
  -2   9   8   45.30    8.50
  -2   9   8   55.69    9.60
  -2   9   8   53.99   12.90
  -2   9   8   48.00   11.60
   1  -9  -8  126.39   12.90
   1  -9  -8  116.19   14.70
   1  -9  -8  106.79   16.70
  -1   9   8  105.79   22.80
  -1   9   8  135.09   16.80
  -1   9   8  129.49   14.80
  -1   9   8  125.69   19.70
   0  -9  -8  251.17   24.20
   0  -9  -8  285.17   25.80
   0  -9  -8  269.67   23.00
   0  -9  -8  222.48   23.70
   0  -9  -8  294.57   23.60
   0   9   8  279.07   25.10
   0   9   8  263.47   26.40
   0   9   8  274.37   27.50
   0   9   8  289.77   31.60
  -1  -9  -8  143.69   12.90
  -1  -9  -8  141.79   16.60
  -1  -9  -8  114.99   13.40
  -1  -9  -8  136.29   13.50
   1   9   8  126.99   18.20
   1   9   8  136.39   24.70
   1   9   8  123.39   17.90
   1   9   8  124.09   19.30
  -2  -9  -8   47.50    8.80
  -2  -9  -8   69.09   12.80
   2   9   8   48.10    9.80
   2   9   8   29.70   17.60
   2   9   8   37.10    9.90
   2   9   8   42.40   13.50
  -3  -9  -8   28.50    6.00
   3   9   8   36.90    8.10
   3   9   8   41.80   12.20
   4   9   8   49.60    9.30
   4   9   8   66.39   11.10
   3 -10  -8    9.20    4.70
  -3  10   8    6.90    4.50
  -3  10   8    8.50    7.60
   2 -10  -8    7.80    5.70
  -2  10   8    6.20    9.40
  -2  10   8   -1.90    5.50
   1 -10  -8  123.59   13.40
   1 -10  -8  123.49   12.80
  -1  10   8  128.29   13.60
  -1  10   8  130.79   19.90
  -1  10   8  136.59   14.70
  -1  10   8  103.39   17.00
   0 -10  -8   25.10    6.40
   0 -10  -8    5.90    4.20
   0  10   8    9.80    6.50
   0  10   8   11.70    7.00
   0  10   8   20.50   11.20
   0  10   8   12.30    9.70
  -1 -10  -8  115.59   12.30
  -1 -10  -8  137.99   13.00
   1  10   8  117.49   17.00
   1  10   8  139.69   15.60
   1  10   8  122.39   21.10
   1  10   8  106.39   16.10
  -2 -10  -8    6.70    4.50
  -2 -10  -8    6.30    3.40
   2  10   8   17.40    8.00
   2  10   8    4.10    6.10
   2  10   8    8.00   13.50
   3  10   8    7.30    5.00
   3  10   8    5.50    5.90
  -1  11   8   12.60    4.50
  -1  11   8   16.90    8.30
  -1  11   8   24.70    8.30
   0 -11  -8    6.20    3.70
   0  11   8   14.20    8.00
   0  11   8    6.00    7.70
   0  11   8    1.40    4.70
   0  11   8   11.50    5.10
  -1 -11  -8    8.60    3.60
   1  11   8    5.50    8.20
   1  11   8    4.50    4.80
   1  11   8   12.00    7.10
   0  11  -9   58.69   12.00
   0  11  -9   32.90   10.30
   2  10  -9  123.69   12.80
   2  10  -9  100.69   18.90
  -2 -10   9   72.59   12.90
   1  10  -9    2.70    8.80
   1  10  -9   29.40   14.40
   1  10  -9  -18.80   10.30
   1  10  -9    4.30    5.80
  -1 -10   9   10.40    7.30
   0  10  -9   23.50   12.30
   0  10  -9   40.80    7.10
   0  10  -9   27.30    9.70
   0 -10   9   85.89   13.60
  -1  10  -9   11.80    8.40
  -1  10  -9    7.90    5.70
   1 -10   9    6.40    5.50
   1 -10   9    5.70    6.10
  -2  10  -9  106.09   12.60
   2 -10   9  145.09   13.20
   4   9  -9    7.70    7.60
   3   9  -9    9.80   12.50
   3   9  -9   -3.00    6.30
   3   9  -9   23.80   12.10
   2   9  -9   69.39   12.60
   2   9  -9   60.79   14.90
   2   9  -9   57.09   12.40
   1   9  -9   -9.50   12.10
   1   9  -9    6.20    7.00
   1   9  -9    9.80   10.60
  -1  -9   9   15.10   10.00
  -1  -9   9   12.40    8.60
  -1  -9   9   -0.40    7.50
   0   9  -9    7.10    7.10
   0   9  -9    2.50    9.70
   0   9  -9    3.00   15.60
   0   9  -9   -7.40   10.40
   0  -9   9   24.00   10.70
   0  -9   9   10.70    8.80
   0  -9   9   -0.70    7.90
  -1   9  -9   -1.30    8.70
  -1   9  -9   16.60    7.00
  -1   9  -9    0.90    9.80
  -1   9  -9   -5.90   10.90
   1  -9   9   14.80    7.90
  -2   9  -9   53.09   11.70
  -2   9  -9   61.99    9.90
  -2   9  -9   55.19   13.00
  -3   9  -9    1.40    6.40
  -3   9  -9   -2.00    5.40
  -3   9  -9    4.80    7.40
   3  -9   9    1.00    5.00
   3  -9   9    2.50    5.90
  -4   9  -9   11.30    5.40
   4   8  -9   82.19   12.50
   4   8  -9  102.39   18.80
   3   8  -9   -1.00   12.50
   3   8  -9   12.30   14.00
   3   8  -9   -6.40   10.80
   3   8  -9    9.20    7.50
   2   8  -9   11.00   12.70
   2   8  -9   23.10   14.00
   2   8  -9   11.40    7.40
   2   8  -9   22.70   13.30
   2   8  -9    2.90   11.10
  -2  -8   9   17.40    9.00
   1   8  -9   59.89   14.20
   1   8  -9   64.19   13.60
   1   8  -9   47.50   14.20
   1   8  -9  125.49   27.80
   1   8  -9   67.29   13.20
  -1  -8   9   86.29   14.60
  -1  -8   9   77.59   15.20
   0   8  -9   11.60    8.20
   0   8  -9   17.50    7.40
   0   8  -9   13.00   11.20
   0   8  -9   15.20   11.00
   0   8  -9   13.60   14.70
   0  -8   9    6.90    8.30
   0  -8   9    7.60    8.10
   0  -8   9   19.60    9.70
  -1   8  -9   96.29   10.90
  -1   8  -9   65.29   12.90
  -1   8  -9   36.80   16.20
  -1   8  -9   68.09   12.70
  -1   8  -9   80.59   15.90
   1  -8   9   49.40   11.50
   1  -8   9   53.49   12.10
   1  -8   9   67.09   15.10
  -2   8  -9   13.90    8.30
  -2   8  -9   10.30    7.30
  -2   8  -9   23.00    7.30
   2  -8   9   12.00    8.40
  -3   8  -9    1.30    6.90
  -3   8  -9    6.60    7.40
   3  -8   9    6.50    8.00
   3  -8   9   13.30    7.90
  -4   8  -9   56.89    9.20
  -4   8  -9   77.99   11.50
   4  -8   9   77.79   10.00
   5   7  -9   92.09    9.20
   5   7  -9   79.19   12.10
   4   7  -9    2.50   12.20
   4   7  -9   -1.20    5.10
   4   7  -9   -3.30    6.90
   4   7  -9   -1.10   11.40
   3   7  -9    4.50    7.50
   3   7  -9    7.00   14.30
   3   7  -9   11.70   13.40
  -3  -7   9    7.70    6.70
   2   7  -9  104.69   23.80
   2   7  -9  112.09   21.30
   2   7  -9  150.08   26.20
   2   7  -9  172.88   25.90
   2   7  -9  134.99   17.50
  -2  -7   9  194.68   17.90
  -2  -7   9  139.39   17.40
   1   7  -9  220.28   24.80
   1   7  -9  184.98   28.30
   1   7  -9  162.68   26.70
   1   7  -9  211.58   29.40
   1   7  -9  209.48   22.00
  -1  -7   9  251.17   22.40
  -1  -7   9  263.47   22.40
   0   7  -9  198.38   33.10
   0   7  -9  190.18   20.90
   0   7  -9  197.58   20.70
   0   7  -9  193.58   24.60
   0   7  -9  252.97   24.30
   0  -7   9  210.28   20.50
   0  -7   9  214.98   21.60
   0  -7   9  219.68   22.20
   0  -7   9  193.78   22.90
  -1   7  -9  253.57   25.00
  -1   7  -9  297.17   22.70
  -1   7  -9  220.48   22.20
  -1   7  -9  227.88   25.20
   1  -7   9  242.18   22.70
   1  -7   9  193.08   24.20
   1  -7   9  208.88   24.20
  -2   7  -9  206.38   20.30
  -2   7  -9  203.18   21.20
   2  -7   9  170.38   20.20
  -3   7  -9   12.90    7.90
  -3   7  -9   15.70    7.30
   3  -7   9   12.70    8.10
   3  -7   9    8.70   11.40
  -4   7  -9    8.90    6.90
  -4   7  -9   13.50    6.60
   4  -7   9    6.50    6.10
   4  -7   9    4.40    8.10
  -5   7  -9   78.79   10.60
  -5   7  -9   93.49   11.50
   5  -7   9   81.29   10.60
   5  -7   9   82.29   13.40
   5   6  -9    7.20    4.50
   5   6  -9    9.10    7.30
  -5  -6   9    7.70    4.40
   4   6  -9   19.80    7.80
   4   6  -9    3.00   10.60
   4   6  -9   17.90   12.80
   4   6  -9    8.10   14.00
   4   6  -9   14.30    5.40
  -4  -6   9   14.10    5.30
   3   6  -9   35.00   14.70
   3   6  -9   39.80    9.40
   3   6  -9   31.10   11.50
   3   6  -9   21.90   14.30
   3   6  -9   44.30    8.80
  -3  -6   9   43.00    7.60
   2   6  -9   53.29   14.20
   2   6  -9   70.09   16.60
   2   6  -9   49.20    8.80
   2   6  -9   61.29   11.60
   2   6  -9   42.50   14.30
   2   6  -9   23.30   12.50
  -2  -6   9   81.39   12.50
  -2  -6   9   57.89   11.80
   1   6  -9   -0.20    6.30
   1   6  -9    3.20    4.70
  -1  -6   9   -2.90    6.80
  -1  -6   9   10.80    6.70
  -1  -6   9   11.00    8.00
  -1  -6   9    9.50    6.50
   0   6  -9   13.40    7.30
   0   6  -9    4.70   18.40
   0  -6   9   28.90    7.30
   0  -6   9    7.80    6.90
   0  -6   9   25.70    8.20
   0  -6   9   14.30    7.50
  -1   6  -9   19.00   19.90
  -1   6  -9    3.80    6.50
   1  -6   9    5.30    7.20
   1  -6   9    3.80    7.40
   1  -6   9    9.50    8.30
  -2   6  -9   36.00   12.50
  -2   6  -9   71.59   11.50
  -2   6  -9   36.90    9.30
   2  -6   9   56.59    9.30
  -3   6  -9   45.70    9.10
  -3   6  -9   39.50   11.50
   3  -6   9   58.59    9.70
   3  -6   9   53.59   12.70
  -4   6  -9   14.50    7.60
  -4   6  -9   10.60    6.70
   4  -6   9    9.30    7.50
   4  -6   9   20.50   12.00
  -5   6  -9    6.50    8.20
  -5   6  -9    8.10    5.90
   5  -6   9   10.10    6.60
   5  -6   9    5.10    9.20
   6   5  -9   68.59   10.10
   6   5  -9   64.99    8.00
   5   5  -9   53.89   13.10
   5   5  -9   75.99   15.00
   5   5  -9   73.39   10.50
   5   5  -9   65.39   14.10
  -5  -5   9   82.39   10.20
   4   5  -9  228.68   21.90
   4   5  -9  209.58   22.40
   4   5  -9  235.68   19.80
   4   5  -9  220.98   28.50
   4   5  -9  211.68   26.30
   4   5  -9  124.99   29.30
  -4  -5   9  201.48   19.10
   3   5  -9   85.49   14.20
   3   5  -9   46.10   16.50
   3   5  -9  101.89   22.40
   3   5  -9   90.39   17.50
   3   5  -9   90.29   11.60
   2   5  -9  460.15   41.00
   2   5  -9  471.95   42.50
  -2  -5   9  543.85   41.20
  -2  -5   9  505.75   41.80
  -2  -5   9  496.25   41.90
  -2  -5   9  487.35   41.10
   1   5  -9  279.97   25.50
   1   5  -9  240.78   38.90
   1   5  -9  265.97   24.50
  -1  -5   9  288.47   24.60
  -1  -5   9  287.77   25.50
  -1  -5   9  315.17   25.30
  -1  -5   9  289.97   26.20
  -1  -5   9  290.57   25.50
   0   5  -9   27.80    7.10
   0   5  -9   15.10   17.50
   0  -5   9   21.40    5.40
   0  -5   9   18.10    6.20
   0  -5   9   23.10    7.10
   0  -5   9   23.30    7.70
   0  -5   9   21.70    7.50
  -1   5  -9  278.87   43.10
  -1   5  -9  277.57   25.00
   1  -5   9  297.87   24.60
   1  -5   9  281.97   25.50
   1  -5   9  231.58   25.10
   1  -5   9  273.57   25.90
  -2   5  -9  445.66   55.59
  -2   5  -9  447.56   40.50
  -2   5  -9  492.05   39.70
   2  -5   9  485.05   41.60
  -3   5  -9  110.39   15.30
  -3   5  -9  133.59   14.80
  -3   5  -9  147.29   15.70
   3  -5   9  119.69   19.90
   3  -5   9   89.79   15.50
  -4   5  -9  243.28   23.00
  -4   5  -9  227.88   23.00
  -4   5  -9  242.78   22.50
  -4   5  -9  200.48   20.30
   4  -5   9  255.67   22.90
   4  -5   9  270.57   27.70
  -5   5  -9   75.39   11.70
  -5   5  -9   85.19   11.10
  -5   5  -9   66.99    8.80
   5  -5   9   97.39   17.10
   5  -5   9   69.99   12.80
  -6   5  -9   55.79    6.90
  -6   5  -9   50.19    6.60
  -6   5  -9   56.09    8.70
   6  -5   9   64.49    8.20
   6  -5   9   49.80   10.50
   6   4  -9   68.79   11.00
   6   4  -9   56.59    8.20
   6   4  -9   34.40    9.10
   5   4  -9   25.10   12.90
   5   4  -9   15.80    9.40
   5   4  -9   28.50    6.00
   5   4  -9   12.70    8.10
  -5  -4   9   11.20    5.90
  -5  -4   9    7.30    5.40
   4   4  -9   12.10   12.20
   4   4  -9    5.90    6.90
   4   4  -9    8.90    8.50
   4   4  -9    2.80    5.10
   4   4  -9    2.80   11.90
   4   4  -9    3.70   15.20
  -4  -4   9    5.50    4.90
  -4  -4   9    4.60    4.70
   3   4  -9  428.56   38.20
   3   4  -9  411.66   39.40
  -3  -4   9  511.85   37.80
  -3  -4   9  451.45   38.90
  -3  -4   9  468.05   38.40
   2   4  -9  179.58   19.70
   2   4  -9  208.88   18.20
  -2  -4   9  186.88   18.70
  -2  -4   9  208.18   18.20
  -2  -4   9  204.28   18.70
   1   4  -9  197.88   18.40
   1   4  -9  187.48   19.00
   1   4  -9  156.48   33.80
  -1  -4   9  247.48   19.40
  -1  -4   9  223.88   18.90
  -1  -4   9  222.48   19.60
   0   4  -9   43.40    9.20
   0   4  -9   59.09   21.10
   0   4  -9   36.80    7.20
   0   4  -9   33.80   17.20
   0  -4   9   52.39    9.30
   0  -4   9   52.49    7.90
   0  -4   9   46.30    9.50
   0  -4   9   42.10    9.10
  -1   4  -9  207.48   34.40
  -1   4  -9  232.98   19.50
   1  -4   9  171.48   19.80
   1  -4   9  201.48   20.00
   1  -4   9  196.58   19.00
  -2   4  -9  186.28   34.20
  -2   4  -9  198.28   19.90
  -2   4  -9  190.58   18.10
   2  -4   9  143.69   19.50
   2  -4   9  198.28   18.80
  -3   4  -9  479.85   37.50
  -3   4  -9  421.36   35.20
  -3   4  -9  351.56   50.49
   3  -4   9  316.07   36.80
   3  -4   9  459.95   36.80
  -4   4  -9    2.60    6.10
  -4   4  -9    7.40    6.10
  -4   4  -9    5.40    8.60
  -4   4  -9    7.70    4.20
   4  -4   9    4.70    7.20
   4  -4   9    0.60   10.80
  -5   4  -9   11.50    6.70
  -5   4  -9   14.30    4.70
  -5   4  -9    9.70    6.30
   5  -4   9   24.70   10.30
   5  -4   9   21.10    7.40
   5  -4   9   19.70    7.60
  -6   4  -9   48.70    7.70
  -6   4  -9   47.60    6.80
  -6   4  -9   46.10    8.80
   6  -4   9   43.90   10.90
   6  -4   9   45.70    7.50
   6  -4   9   55.19    8.60
   6   3  -9   46.40   11.00
   6   3  -9   33.70    6.30
   6   3  -9   55.29   12.50
  -6  -3   9   39.60    8.80
  -6  -3   9   36.80    8.40
   5   3  -9   65.99   11.10
   5   3  -9   52.89   15.00
   5   3  -9   70.99   13.30
   5   3  -9   65.69   15.60
  -5  -3   9   66.99   10.40
  -5  -3   9   84.29   12.00
   4   3  -9  163.18   16.40
   4   3  -9  155.28   18.50
   4   3  -9  154.38   28.30
   4   3  -9  154.68   19.10
   4   3  -9  156.78   26.80
   4   3  -9  132.29   23.00
  -4  -3   9  181.88   16.00
  -4  -3   9  170.88   15.70
   3   3  -9   99.39   11.80
   3   3  -9  100.89   12.90
  -3  -3   9  110.79   10.80
  -3  -3   9   82.09   11.60
  -3  -3   9   91.79   11.30
  -3  -3   9  118.99   11.50
  -3  -3   9   99.89   11.80
   2   3  -9  112.59   12.10
   2   3  -9  105.59   22.80
   2   3  -9  105.49   13.20
  -2  -3   9  114.49   11.80
  -2  -3   9  117.09   12.30
  -2  -3   9  120.19   12.00
  -2  -3   9  115.99   11.70
   1   3  -9  137.49   14.20
   1   3  -9  140.09   12.20
   1   3  -9  148.09   25.00
   1   3  -9  129.59   12.70
  -1  -3   9  119.99   13.00
  -1  -3   9  114.29   13.30
  -1  -3   9  105.89   12.20
  -1  -3   9  129.19   12.60
   0   3  -9  602.14   45.90
   0   3  -9  553.04   52.99
   0   3  -9  558.64   55.49
   0  -3   9  479.85   45.50
   0  -3   9  579.64   46.10
   0  -3   9  569.94   46.10
   0  -3   9  565.94   45.60
  -1   3  -9   92.39   26.50
  -1   3  -9  130.19   17.00
  -1   3  -9  131.39   23.50
   1  -3   9  133.89   13.30
   1  -3   9  127.69   14.10
  -2   3  -9  117.39   27.70
  -2   3  -9  102.99   14.60
   2  -3   9  102.59   13.70
   2  -3   9   95.49   12.90
  -3   3  -9   91.49   16.00
  -3   3  -9  111.79   15.70
  -3   3  -9   68.19   28.20
   3  -3   9   75.49   13.60
   3  -3   9   88.99   13.80
  -4   3  -9  172.08   22.70
  -4   3  -9  161.68   15.50
  -4   3  -9  164.28   18.20
  -4   3  -9  165.48   17.80
   4  -3   9  177.48   17.90
   4  -3   9  194.68   22.60
  -5   3  -9   67.09    8.80
  -5   3  -9   66.09   12.50
  -5   3  -9   69.99   11.30
   5  -3   9   75.19   16.10
   5  -3   9   67.19   11.90
   5  -3   9   59.99   12.20
  -6   3  -9   46.30    9.20
  -6   3  -9   45.30    8.70
  -6   3  -9   45.90    6.90
   6  -3   9   33.60    8.10
   6  -3   9   44.70   11.20
   6  -3   9   39.50    8.00
   6   2  -9    6.90    6.50
   6   2  -9    4.60   10.10
   6   2  -9    3.10    5.00
   6   2  -9   16.30    9.30
  -6  -2   9   12.20    5.20
  -6  -2   9    4.50    4.60
   5   2  -9   67.49   11.10
   5   2  -9   48.30   14.60
   5   2  -9   76.89   15.50
   5   2  -9   61.29   13.30
  -5  -2   9   74.99   11.40
  -5  -2   9   60.79   10.10
   4   2  -9  197.38   19.70
   4   2  -9  201.58   23.10
   4   2  -9  209.68   20.00
   4   2  -9  217.18   31.70
   4   2  -9  226.98   34.00
   4   2  -9  200.88   22.60
  -4  -2   9  200.78   18.50
  -4  -2   9  198.88   18.80
  -4  -2   9  184.38   19.10
  -4  -2   9  199.28   18.30
   3   2  -9  313.37   25.00
   3   2  -9  283.47   25.10
  -3  -2   9  257.67   23.70
  -3  -2   9  276.87   24.40
  -3  -2   9  280.57   24.00
  -3  -2   9  262.27   23.40
   2   2  -9  758.52   68.99
   2   2  -9  758.22   66.09
   2   2  -9  752.62   65.79
   2   2  -9  793.32   72.59
  -2  -2   9  885.01   65.79
  -2  -2   9  832.82   65.89
  -2  -2   9  823.92   65.29
  -2  -2   9  894.81   65.89
   1   2  -9  134.59   23.90
   1   2  -9  121.19   13.60
   1   2  -9  120.99   13.20
   1   2  -9  131.69   14.60
  -1  -2   9  166.78   13.70
  -1  -2   9  167.08   15.30
  -1  -2   9  160.28   13.90
  -1  -2   9  161.38   13.60
   0   2  -9    3.60   11.30
   0   2  -9   -0.30   11.00
   0  -2   9   -0.40    3.80
   0  -2   9   -0.30    3.60
   0  -2   9   -0.70    3.50
  -1   2  -9  132.99   15.50
  -1   2  -9  162.48   23.00
  -1   2  -9  166.18   28.20
   1  -2   9  127.29   13.70
   1  -2   9  124.89   13.40
   1  -2   9  125.99   13.90
  -2   2  -9  832.72   74.09
  -2   2  -9  776.82   64.19
   2  -2   9  779.02   63.39
   2  -2   9  711.23   63.09
  -3   2  -9  243.18   38.30
  -3   2  -9  252.97   26.30
  -3   2  -9  255.17   26.80
   3  -2   9  233.38   24.30
   3  -2   9  281.27   24.40
  -4   2  -9  209.78   20.50
  -4   2  -9  204.98   18.40
  -4   2  -9  174.78   23.70
  -4   2  -9  178.98   25.60
   4  -2   9  230.98   25.20
   4  -2   9  217.78   28.00
   4  -2   9  193.08   22.30
  -5   2  -9   80.09   12.20
  -5   2  -9   73.69   13.00
  -5   2  -9   93.19    8.90
  -5   2  -9   70.49    9.40
   5  -2   9   57.39   12.30
   5  -2   9   61.29   15.60
   5  -2   9   77.29   11.60
   5  -2   9   72.29    8.70
  -6   2  -9   20.70    6.50
  -6   2  -9   11.30    4.10
  -6   2  -9   10.10    3.70
   6  -2   9    3.00    7.40
   6  -2   9   11.30    5.30
   6  -2   9    4.20    4.40
   6   1  -9  161.08   16.20
   6   1  -9  168.18   16.40
   6   1  -9  116.59   18.00
  -6  -1   9  129.39   14.10
  -6  -1   9  106.39   14.80
  -6  -1   9  141.19   13.80
   5   1  -9   80.89   12.10
   5   1  -9   73.39   13.80
   5   1  -9   73.69   14.70
   5   1  -9   93.29   20.40
   5   1  -9   88.99   16.50
  -5  -1   9   88.39   11.10
  -5  -1   9   88.59   12.10
  -5  -1   9   93.39   11.00
   4   1  -9  164.38   20.30
   4   1  -9  186.68   20.70
  -4  -1   9  210.78   20.10
  -4  -1   9  236.58   19.70
  -4  -1   9  246.58   19.80
  -4  -1   9  218.18   19.30
   3   1  -9  242.98   21.00
   3   1  -9  240.98   26.30
   3   1  -9  211.28   20.60
  -3  -1   9  217.88   20.30
  -3  -1   9  230.08   19.90
  -3  -1   9  210.78   19.60
   2   1  -9  412.56   32.30
   2   1  -9  419.96   39.80
   2   1  -9  370.16   36.30
   2   1  -9  393.26   32.10
  -2  -1   9  365.86   31.60
  -2  -1   9  360.66   31.40
  -2  -1   9  363.36   31.90
   1   1  -9  329.97   36.50
   1   1  -9  319.27   32.00
   1   1  -9  288.37   28.10
   1   1  -9  305.27   27.80
  -1  -1   9  353.16   28.00
  -1  -1   9  371.06   28.00
  -1  -1   9  373.76   28.00
   0   1  -9  284.57   32.70
   0   1  -9  282.67   34.70
   0   1  -9  266.97   26.70
   0  -1   9  249.78   26.60
   0  -1   9  287.37   23.50
   0  -1   9  293.97   23.30
   0  -1   9  263.37   23.20
  -1   1  -9  370.76   40.90
  -1   1  -9  326.97   29.50
  -1   1  -9  356.86   36.40
   1  -1   9  322.77   27.70
   1  -1   9  287.27   27.40
  -2   1  -9  294.17   31.60
  -2   1  -9  348.67   32.80
  -2   1  -9  322.17   43.50
   2  -1   9  395.76   30.40
   2  -1   9  385.56   31.10
  -3   1  -9  220.28   24.20
  -3   1  -9  167.08   23.30
  -3   1  -9  204.08   36.00
   3  -1   9  239.68   21.40
  -4   1  -9  223.38   27.70
  -4   1  -9  236.38   19.10
  -4   1  -9  189.58   25.20
   4  -1   9  204.38   23.50
  -5   1  -9   83.59   13.70
  -5   1  -9   96.59    9.60
  -5   1  -9  100.39   10.30
  -5   1  -9   85.19   21.00
   5  -1   9   81.29   11.70
   5  -1   9   78.29   12.90
   5  -1   9   83.09   15.00
   5  -1   9   83.89    9.50
  -6   1  -9  154.38   13.00
  -6   1  -9  115.49   12.00
  -6   1  -9  134.19   15.50
   6  -1   9  142.29   12.40
   6  -1   9  135.39   13.80
   6  -1   9  153.48   16.00
   6   0  -9  117.99   14.00
   6   0  -9   92.69   15.80
   6   0  -9  133.09   15.10
  -6   0   9   85.19   11.40
  -6   0   9  106.39   12.80
  -6   0   9  102.29   13.60
  -6   0   9  111.49   11.60
   5   0  -9   23.30    9.80
   5   0  -9   46.50   10.80
   5   0  -9   42.80    9.10
  -5   0   9   31.10    9.00
  -5   0   9   38.10    8.50
  -5   0   9   32.60    6.70
  -5   0   9   30.80    6.60
  -5   0   9   28.70    6.60
   4   0  -9  154.18   24.00
   4   0  -9  110.89   14.90
  -4   0   9  106.69   14.30
  -4   0   9  110.59   12.50
  -4   0   9  122.79   12.50
  -4   0   9  117.89   13.40
  -4   0   9  119.59   13.50
   3   0  -9   75.29   16.60
   3   0  -9   64.89   10.70
  -3   0   9   59.39    8.80
  -3   0   9   59.39    7.90
  -3   0   9   44.80    9.70
  -3   0   9   60.09    8.40
   2   0  -9  100.49   17.30
   2   0  -9   69.69   20.30
   2   0  -9   79.39   11.00
  -2   0   9   87.59    9.10
  -2   0   9   94.59   10.80
  -2   0   9   96.59    9.70
  -2   0   9   74.89    9.60
   1   0  -9   82.09   21.90
   1   0  -9   80.19   15.10
  -1   0   9   54.79    8.10
  -1   0   9   60.59    7.50
  -1   0   9   50.89    7.20
  -1   0   9   73.79   11.70
  -1   0   9   55.79    7.00
   0   0  -9   18.70   13.30
   0   0  -9   17.50    9.20
   0   0  -9   11.00   13.70
   0   0   9    9.20    6.50
   0   0   9   12.30    3.50
   0   0   9   11.40    3.90
   0   0   9   14.10    4.30
   0   0   9    6.90    4.30
  -1   0  -9   49.99    9.70
  -1   0  -9   93.49   29.20
  -1   0  -9   61.29   22.80
   1   0   9   48.50    9.40
   1   0   9   57.79    9.10
   1   0   9   57.59    8.10
  -2   0  -9   91.29   31.90
  -2   0  -9   79.89   16.70
  -2   0  -9   74.49   13.60
   2   0   9   80.29   12.10
   2   0   9   72.89   10.50
  -3   0  -9   52.19   12.00
  -3   0  -9   54.29   11.70
  -3   0  -9   50.69    6.10
  -3   0  -9   42.40   20.10
   3   0   9   47.50    9.30
  -4   0  -9  106.39   10.80
  -4   0  -9  101.69   21.20
  -4   0  -9   76.89   20.00
  -4   0  -9  122.89   11.20
   4   0   9  124.59   16.30
  -5   0  -9   41.30   13.70
  -5   0  -9   40.20    7.10
  -5   0  -9   46.30   11.10
  -5   0  -9   34.20    7.50
  -5   0  -9   40.90    7.20
   5   0   9   46.00   10.10
   5   0   9   32.10    9.60
   5   0   9   45.40   10.20
   5   0   9   52.29    7.00
  -6   0  -9  105.09   10.40
  -6   0  -9  113.89   13.20
  -6   0  -9   90.79    9.80
   6   0   9  108.59   13.70
   6   0   9  111.09   12.80
   6   0   9   98.49    9.90
   6   0   9   97.39   11.40
   6  -1  -9  156.58   17.00
   6  -1  -9  166.48   18.50
  -6   1   9  141.99   15.40
  -6   1   9  165.38   14.60
  -6   1   9  153.88   15.90
   5  -1  -9  104.39   13.30
   5  -1  -9  104.19   16.20
   5  -1  -9  118.19   14.10
   5  -1  -9  121.09   18.20
  -5   1   9   84.69   11.40
  -5   1   9   91.29   11.70
  -5   1   9   96.39   14.10
  -5   1   9   95.49   12.20
   4  -1  -9  228.88   29.40
   4  -1  -9  230.28   22.30
  -4   1   9  206.38   20.30
  -4   1   9  216.08   19.90
  -4   1   9  219.78   21.70
   3  -1  -9  304.57   27.60
   3  -1  -9  307.07   26.80
   3  -1  -9  278.67   31.30
  -3   1   9  334.27   26.40
  -3   1   9  258.27   26.10
  -3   1   9  257.37   25.60
  -3   1   9  298.57   25.40
   2  -1  -9  385.76   44.30
   2  -1  -9  371.36   35.90
   2  -1  -9  395.86   36.50
   2  -1  -9  418.26   40.30
  -2   1   9  429.26   34.90
  -2   1   9  491.05   36.10
  -2   1   9  472.95   35.40
   1  -1  -9  499.65   47.00
   1  -1  -9  518.45   40.60
  -1   1   9  413.96   35.70
  -1   1   9  431.96   36.10
  -1   1   9  377.46   35.30
   0  -1  -9  191.28   36.20
   0  -1  -9  253.37   34.40
   0  -1  -9  216.58   23.60
   0   1   9  213.48   19.00
   0   1   9  223.78   19.90
   0   1   9  223.38   20.20
   0   1   9  251.47   19.70
  -1  -1  -9  440.46   40.80
  -1  -1  -9  476.05   50.09
  -1  -1  -9  507.35   55.19
   1   1   9  487.65   38.30
   1   1   9  429.66   39.30
   1   1   9  442.26   39.40
   1   1   9  493.35   38.80
  -2  -1  -9  482.35   39.40
  -2  -1  -9  464.15   54.79
  -2  -1  -9  424.86   34.20
  -2  -1  -9  366.16   37.50
  -2  -1  -9  413.96   48.20
   2   1   9  422.56   35.70
   2   1   9  408.26   36.80
  -3  -1  -9  355.46   31.70
  -3  -1  -9  212.68   43.70
  -3  -1  -9  283.67   24.30
  -3  -1  -9  272.57   30.00
  -3  -1  -9  307.47   24.00
   3   1   9  237.78   28.40
   3   1   9  346.27   27.20
  -4  -1  -9  187.88   28.10
  -4  -1  -9  244.98   19.40
  -4  -1  -9  226.18   19.50
  -4  -1  -9  172.38   28.10
   4   1   9  253.47   23.60
  -5  -1  -9   62.29   16.90
  -5  -1  -9   74.19   10.50
  -5  -1  -9   91.89   10.10
  -5  -1  -9   81.09    9.80
  -5  -1  -9   86.99    9.90
  -5  -1  -9   78.09   13.00
   5   1   9  103.59   12.10
   5   1   9  110.89   10.00
   5   1   9  104.19   15.10
   5   1   9  120.39   12.80
  -6  -1  -9  184.88   14.30
  -6  -1  -9  148.89   14.20
  -6  -1  -9  155.88   16.50
   6   1   9  140.59   16.40
   6   1   9  164.38   18.00
   6   1   9  158.98   15.20
   6   1   9  158.78   14.30
   6  -2  -9   17.10    5.60
   6  -2  -9   16.70    8.60
   6  -2  -9   14.70    7.90
  -6   2   9   10.80    5.90
  -6   2   9   15.40    5.70
   5  -2  -9  116.19   17.10
   5  -2  -9   95.59   15.80
   5  -2  -9   92.39   14.90
   5  -2  -9  116.29   13.60
  -5   2   9   98.89   12.50
  -5   2   9   73.89   13.80
  -5   2   9   93.39   11.30
   4  -2  -9  197.58   24.40
   4  -2  -9  196.08   23.60
   4  -2  -9  246.68   24.40
  -4   2   9  273.27   23.70
  -4   2   9  246.58   23.00
  -4   2   9  285.87   24.00
  -4   2   9  225.98   21.60
   3  -2  -9  292.37   28.70
   3  -2  -9  299.47   28.20
   3  -2  -9  269.17   33.80
  -3   2   9  310.87   26.60
  -3   2   9  357.56   28.00
   2  -2  -9  841.32   66.99
   2  -2  -9  718.03   70.79
   2  -2  -9  771.42   62.49
   2  -2  -9  811.52   62.69
  -2   2   9  724.73   61.59
  -2   2   9  734.63   62.29
   1  -2  -9  186.48   31.20
   1  -2  -9  164.08   21.00
  -1   2   9  122.59   12.90
  -1   2   9  109.29   11.90
   0  -2  -9    9.90   10.70
   0  -2  -9   -7.90   15.90
   0  -2  -9   -5.90   14.00
   0   2   9   -1.80    3.60
   0   2   9    1.70    4.80
   0   2   9    1.90    4.60
  -1  -2  -9  114.39   18.60
  -1  -2  -9  118.89   28.90
  -1  -2  -9   93.19   32.50
   1   2   9  151.48   14.40
   1   2   9  164.88   15.90
   1   2   9  143.79   15.80
  -2  -2  -9  740.73   61.19
  -2  -2  -9  633.94   67.39
  -2  -2  -9  670.13   73.69
  -2  -2  -9  677.13   56.89
   2   2   9  769.02   59.09
   2   2   9  778.82   60.19
  -3  -2  -9  347.17   35.00
  -3  -2  -9  354.56   27.40
  -3  -2  -9  267.57   48.60
  -3  -2  -9  324.87   33.70
  -3  -2  -9  364.26   27.60
   3   2   9  281.67   31.50
  -4  -2  -9  230.68   30.90
  -4  -2  -9  260.17   31.00
  -4  -2  -9  267.17   21.50
  -4  -2  -9  277.37   21.70
   4   2   9  188.58   25.80
   4   2   9  259.37   26.70
  -5  -2  -9   97.99   10.70
  -5  -2  -9  112.89   11.00
  -5  -2  -9   89.29   10.60
  -5  -2  -9   76.29   24.90
   5   2   9  101.99   13.10
   5   2   9  112.59   12.60
   5   2   9  113.39   16.10
   5   2   9  115.19   10.80
  -6  -2  -9   11.70    3.60
  -6  -2  -9   17.00    3.40
   6   2   9   15.80    5.80
   6   2   9   12.20    5.00
   6   2   9   28.90    5.70
   6   2   9   14.10    7.70
   6  -3  -9   32.80    8.80
   6  -3  -9   20.30    6.90
   6  -3  -9   49.70    8.80
   6  -3  -9   55.19   10.00
  -6   3   9   43.00    6.90
  -6   3   9   56.99    8.60
   5  -3  -9   67.59   11.20
   5  -3  -9   44.50   11.40
   5  -3  -9   44.30   10.60
   5  -3  -9   60.69   13.20
  -5   3   9   56.19    9.10
  -5   3   9   49.80    9.70
   4  -3  -9  152.08   16.80
   4  -3  -9  168.28   17.70
   4  -3  -9  161.88   20.20
   4  -3  -9  164.58   18.90
  -4   3   9  162.08   17.60
  -4   3   9  164.68   16.00
  -4   3   9  152.98   18.70
   3  -3  -9  121.29   15.50
   3  -3  -9   96.09   22.50
   3  -3  -9  122.49   15.10
  -3   3   9  125.69   13.90
   2  -3  -9   76.59   17.50
   2  -3  -9   91.39   11.30
  -2   3   9   74.49    8.30
  -2   3   9   62.39    9.80
   1  -3  -9  160.28   29.40
   1  -3  -9  123.29   21.60
  -1   3   9  154.98   14.20
  -1   3   9  172.18   15.20
   0  -3  -9  411.16   39.60
   0  -3  -9  424.96   47.00
   0  -3  -9  443.06   48.10
   0   3   9  462.45   36.20
   0   3   9  434.56   36.90
   0   3   9  440.76   36.80
  -1  -3  -9  152.78   31.90
  -1  -3  -9  160.28   12.80
  -1  -3  -9  188.28   20.50
  -1  -3  -9  175.08   28.60
   1   3   9  129.19   16.50
   1   3   9  120.09   15.00
   1   3   9  145.99   16.60
  -2  -3  -9   74.19   17.70
  -2  -3  -9   79.69    7.50
  -2  -3  -9  101.99   24.30
  -2  -3  -9  100.69   31.00
   2   3   9   42.30   11.70
   2   3   9   71.79   12.00
  -3  -3  -9   81.49   37.30
  -3  -3  -9  128.09   12.00
  -3  -3  -9  142.19   12.00
  -3  -3  -9  159.98   23.60
   3   3   9  129.29   19.10
  -4  -3  -9  188.38   16.40
  -4  -3  -9  175.78   28.90
  -4  -3  -9  186.48   16.50
   4   3   9  184.18   17.80
   4   3   9  191.78   18.40
   4   3   9  176.48   20.20
   4   3   9  194.18   16.60
  -5  -3  -9   57.69    7.90
  -5  -3  -9   50.49    7.70
  -5  -3  -9   56.49    7.90
   5   3   9   62.49    9.70
   5   3   9   62.59    7.90
   5   3   9   62.19   11.00
   5   3   9   73.69   14.10
  -6  -3  -9   49.30    7.00
  -6  -3  -9   40.70    6.40
   6   3   9   70.49   12.10
   6   3   9   67.19    6.70
   6   3   9   56.29    8.30
   6  -4  -9   49.40   11.00
   6  -4  -9   54.49   10.20
   6  -4  -9   54.39   12.70
  -6   4   9   36.50    8.00
  -6   4   9   64.79    8.10
   5  -4  -9    6.00   10.10
   5  -4  -9    9.00    7.70
   5  -4  -9    5.80    5.10
   5  -4  -9   21.30    8.90
  -5   4   9   13.10    6.70
  -5   4   9   16.80    6.10
   4  -4  -9    9.30    5.40
   4  -4  -9    7.20    8.00
   4  -4  -9   10.90   10.30
   4  -4  -9    7.00    8.70
  -4   4   9   11.70    6.50
  -4   4   9   14.70    5.60
  -4   4   9   14.80    5.70
   3  -4  -9  419.36   34.10
   3  -4  -9  407.16   33.90
   3  -4  -9  384.46   40.80
  -3   4   9  318.67   32.60
   2  -4  -9  194.58   27.10
  -2   4   9  217.28   19.80
   1  -4  -9  207.48   24.90
   1  -4  -9  216.78   31.20
  -1   4   9  192.18   18.50
  -1   4   9  198.58   18.90
   0  -4  -9   77.89   26.60
   0  -4  -9   68.09   24.00
   0  -4  -9   56.69   16.00
   0  -4  -9   47.50    6.00
   0   4   9   55.69    9.60
   0   4   9   45.70    9.10
  -1  -4  -9  213.98   36.20
  -1  -4  -9  197.38   31.60
  -1  -4  -9  193.78   16.40
   1   4   9  173.28   19.60
   1   4   9  209.38   19.00
   1   4   9  205.28   20.40
  -2  -4  -9  245.18   40.00
  -2  -4  -9  234.38   20.10
  -2  -4  -9  291.67   33.90
  -2  -4  -9  250.57   28.70
  -2  -4  -9  250.47   20.10
   2   4   9  201.18   25.00
  -3  -4  -9  483.95   46.30
  -3  -4  -9  379.16   56.99
  -3  -4  -9  478.25   37.80
  -3  -4  -9  485.65   37.80
  -4  -4  -9   -4.60   14.20
  -4  -4  -9   16.00    3.80
  -4  -4  -9   14.90    3.70
   4   4   9   11.40    3.90
   4   4   9    8.10    8.70
   4   4   9    9.50    5.90
  -5  -4  -9   15.40    3.90
  -5  -4  -9   10.10    3.60
   5   4   9   11.90    6.00
   5   4   9    9.50    8.70
   5   4   9   11.60    3.70
  -6  -4  -9   68.69    8.90
  -6  -4  -9   57.89    6.80
  -6  -4  -9   60.09    6.70
   6   4   9   52.19    6.40
   6   4   9   55.59   10.30
   6   4   9   66.89    8.80
   6  -5  -9   46.80    8.00
   6  -5  -9   41.80    9.00
   6  -5  -9   32.40    8.60
  -6   5   9   49.20    6.10
  -6   5   9   35.80    7.10
   5  -5  -9   71.99   13.40
   5  -5  -9   75.59   17.80
   5  -5  -9   71.69   13.10
  -5   5   9   66.49    9.60
  -5   5   9   60.79   10.50
   4  -5  -9  211.98   22.00
   4  -5  -9  165.78   24.50
   4  -5  -9  192.38   22.10
  -4   5   9  226.48   19.90
  -4   5   9  230.08   19.90
  -4   5   9  210.18   19.20
   3  -5  -9  148.09   17.40
   3  -5  -9  120.99   19.50
   3  -5  -9  135.09   15.50
   3  -5  -9  120.59   16.10
  -3   5   9  121.99   14.10
  -3   5   9  132.79   16.50
  -3   5   9  140.49   14.20
   2  -5  -9  474.65   46.20
  -2   5   9  464.35   40.60
  -2   5   9  490.25   40.40
   1  -5  -9  296.07   30.70
   1  -5  -9  315.97   36.40
  -1   5   9  234.58   25.70
  -1   5   9  249.78   23.80
  -1   5   9  256.07   24.20
   0  -5  -9   22.60   11.60
   0  -5  -9   13.10    3.30
   0  -5  -9   19.90    3.50
   0  -5  -9   29.70   16.00
   0   5   9   11.60    7.20
   0   5   9   17.60    6.20
  -1  -5  -9  346.47   43.20
  -1  -5  -9  330.77   47.40
  -1  -5  -9  306.07   24.00
  -1  -5  -9  299.57   24.00
   1   5   9  232.78   26.70
   1   5   9  270.87   27.80
  -2  -5  -9  507.95   41.60
  -2  -5  -9  544.45   49.00
  -2  -5  -9  617.34   56.79
  -2  -5  -9  502.05   61.09
  -2  -5  -9  521.85   41.60
   2   5   9  440.66   45.80
  -3  -5  -9  133.99   13.00
  -3  -5  -9  140.69   13.00
   3   5   9  152.48   18.00
   3   5   9  166.28   16.10
   3   5   9  204.08   23.10
  -4  -5  -9  247.28   19.90
  -4  -5  -9  212.48   32.40
  -4  -5  -9  243.38   19.90
   4   5   9  223.08   24.40
   4   5   9  217.28   21.80
  -5  -5  -9   56.79    7.50
   5   5   9   78.29   10.90
   5   5   9   83.29   12.10
  -6  -5  -9   48.50    5.60
   6   5   9   45.30    7.60
   6   5   9   43.90    9.50
   5  -6  -9    1.10    9.00
   5  -6  -9    8.30    7.10
  -5   6   9    2.10    4.00
  -5   6   9   10.40    5.80
   4  -6  -9    3.60    8.10
   4  -6  -9   -0.30   10.40
  -4   6   9   14.30    6.40
  -4   6   9   12.10    6.70
  -4   6   9   22.20    8.30
   3  -6  -9   34.90    8.00
   3  -6  -9   34.90   11.60
  -3   6   9   26.20    8.20
  -3   6   9   24.70    6.80
  -3   6   9   29.10    6.80
   2  -6  -9   90.59   16.40
   2  -6  -9   79.59   11.60
  -2   6   9   87.79   11.10
  -2   6   9   73.29   13.30
  -2   6   9   72.89   10.90
   1  -6  -9   26.20   14.00
  -1   6   9    1.80    5.40
  -1   6   9   -2.10    6.50
  -1   6   9    0.90    9.00
   0  -6  -9    8.60    3.80
   0  -6  -9   35.60   18.10
   0  -6  -9   14.00    3.80
   0  -6  -9   38.70   13.50
   0   6   9   15.10    6.60
   0   6   9   10.80    7.90
  -1  -6  -9  108.69   38.70
   1   6   9    4.50    7.90
  -2  -6  -9   92.59    8.70
  -2  -6  -9   86.39    8.60
   2   6   9   98.99   18.30
   2   6   9  103.79   13.10
   2   6   9   79.29   15.80
   2   6   9   60.39   13.90
  -3  -6  -9   29.90    4.90
  -3  -6  -9   29.60    5.30
   3   6   9   27.30    7.60
   3   6   9   33.50   10.20
   3   6   9   41.70    9.10
  -4  -6  -9   22.80    5.30
  -4  -6  -9   26.50    4.70
   4   6   9   15.70    8.30
   4   6   9   20.50    9.20
   4   6   9   13.90    6.90
  -5  -6  -9    6.00    2.60
   5   6   9    3.50    5.90
   5   6   9   12.90    7.10
   5  -7  -9   98.79   11.10
   5  -7  -9   81.69   13.40
  -5   7   9   80.49   10.60
  -5   7   9   77.99   10.00
   4  -7  -9    3.10   10.00
   4  -7  -9    6.80    7.30
  -4   7   9    6.30    6.70
  -4   7   9   13.50    6.10
  -4   7   9    5.30    5.70
   3  -7  -9   -0.70    6.60
   3  -7  -9    6.50    9.80
  -3   7   9   16.60    7.80
  -3   7   9    0.60    5.90
  -3   7   9    7.30    6.00
   2  -7  -9  191.78   17.10
   2  -7  -9  143.89   20.00
  -2   7   9  150.48   16.20
  -2   7   9  130.19   16.20
  -2   7   9  177.58   17.60
   1  -7  -9  216.58   18.30
   1  -7  -9  235.68   22.20
   1  -7  -9  206.08   19.60
  -1   7   9  191.48   21.60
  -1   7   9  175.38   19.50
  -1   7   9  174.98   25.10
  -1   7   9  193.18   19.20
   0  -7  -9  296.47   25.10
   0  -7  -9  306.67   25.10
   0  -7  -9  288.77   25.50
   0  -7  -9  305.37   26.20
   0   7   9  310.27   28.70
   0   7   9  284.07   26.10
   0   7   9  301.17   26.40
   0   7   9  294.67   28.30
  -1  -7  -9  214.78   18.20
  -1  -7  -9  199.98   17.90
  -1  -7  -9  187.78   17.90
   1   7   9  222.38   21.80
   1   7   9  236.28   26.80
   1   7   9  230.98   22.90
   1   7   9  208.48   28.30
  -2  -7  -9  180.68   16.50
  -2  -7  -9  204.08   16.60
   2   7   9  179.58   23.90
   2   7   9  206.68   21.90
   2   7   9  190.78   20.40
  -3  -7  -9    2.40    2.70
  -3  -7  -9    3.90    3.30
   3   7   9    2.10    8.00
   3   7   9    6.60    7.40
   3   7   9   10.10    8.40
  -4  -7  -9    6.30    2.90
   4   7   9    4.70    6.80
   4   7   9   -2.90    7.30
   5   7   9   91.79   11.40
  -4   8   9   71.39    9.50
  -4   8   9   86.89   10.50
   3  -8  -9    2.50    6.20
   3  -8  -9   -0.10    8.70
  -3   8   9   37.50   12.20
  -3   8   9   16.10    7.20
  -3   8   9    6.00    6.10
  -3   8   9    8.20    6.20
   2  -8  -9   22.80    7.40
   2  -8  -9   17.50    9.40
  -2   8   9   14.30    7.40
  -2   8   9   11.30    6.70
  -2   8   9   10.90   10.70
  -2   8   9    9.00   11.90
  -2   8   9   14.50    6.60
   1  -8  -9   74.49   11.40
   1  -8  -9   68.49    9.50
   1  -8  -9   66.89   14.50
  -1   8   9   59.39   10.80
  -1   8   9   48.80   13.90
  -1   8   9   37.20   12.00
  -1   8   9   62.09   13.70
  -1   8   9   65.79   10.90
   0  -8  -9   23.90    6.30
   0  -8  -9   21.30    5.40
   0  -8  -9   25.70    9.00
   0  -8  -9   15.60    4.80
   0  -8  -9   18.20    4.60
   0   8   9   36.60   13.60
   0   8   9   19.60    9.30
   0   8   9   12.00    7.20
   0   8   9   15.20    8.20
  -1  -8  -9   57.09    8.90
  -1  -8  -9   55.19    7.90
  -1  -8  -9   52.89    8.20
   1   8   9  120.29   23.10
   1   8   9   74.49   18.00
   1   8   9  112.79   14.50
   1   8   9   95.89   14.30
  -2  -8  -9   18.10    4.00
  -2  -8  -9   16.20    4.30
   2   8   9   33.40    8.80
   2   8   9   18.70    8.30
   2   8   9   21.50    8.70
  -3  -8  -9    7.80    3.30
   3   8   9   -1.40    7.10
   3   8   9    2.80    7.50
   4   8   9   58.99   11.10
   4   8   9   72.79   13.20
  -4   9   9    1.50    5.10
   3  -9  -9    0.10    5.60
   3  -9  -9    2.30    6.10
  -3   9   9    3.90    5.60
  -3   9   9    4.70    5.20
  -3   9   9    4.50   14.40
  -3   9   9    1.40    5.50
   2  -9  -9   53.69   10.50
   2  -9  -9   31.60    8.80
  -2   9   9   42.60   12.50
  -2   9   9   36.70   10.70
  -2   9   9   41.50    9.00
  -2   9   9   51.19    7.90
   1  -9  -9   -3.30    7.80
   1  -9  -9   -3.60    6.20
   1  -9  -9    1.30    4.40
  -1   9   9   -8.50    6.30
  -1   9   9  -15.00    9.50
  -1   9   9    2.00   11.70
  -1   9   9   -1.20    7.20
   0  -9  -9   10.40    4.30
   0  -9  -9   14.40    6.10
   0  -9  -9    3.80    7.80
   0  -9  -9   16.40    5.20
   0   9   9    3.50    7.60
   0   9   9   12.80    9.50
   0   9   9   -1.80   11.90
   0   9   9    6.20    7.00
  -1  -9  -9    1.50    4.20
  -1  -9  -9    4.00    4.40
  -1  -9  -9   -0.70    4.00
  -1  -9  -9    8.30    7.40
   1   9   9    3.70    7.00
   1   9   9  -10.50   11.70
   1   9   9   11.70    8.10
   1   9   9    6.20    8.70
  -2  -9  -9   51.79    7.60
  -2  -9  -9   53.39    7.60
   2   9   9   40.70   13.00
   2   9   9   55.09   12.90
   2   9   9   54.89    9.80
  -3  -9  -9    9.70    3.10
  -3  -9  -9    5.90    3.40
   3   9   9   -0.40    5.90
   3   9   9   -1.80    6.80
   4   9   9    1.30    5.50
   2 -10  -9  127.69   12.90
  -2  10   9  117.29   17.80
  -2  10   9  114.79   12.50
   1 -10  -9   15.70    5.50
   1 -10  -9    4.40    3.90
  -1  10   9    3.60    9.90
  -1  10   9   10.00    9.10
  -1  10   9    6.90    5.80
  -1  10   9   13.40    5.90
   0 -10  -9   36.30    7.30
   0  10   9   47.70   10.60
   0  10   9   26.60   11.60
   0  10   9   42.90   10.30
   0  10   9   40.30    7.10
  -1 -10  -9   32.50    7.80
   1  10   9    7.80    6.90
   1  10   9   23.50   10.40
   1  10   9   24.00    9.00
  -2 -10  -9  114.69   11.20
   2  10   9  134.19   15.20
   2  10   9  122.69   13.70
   2  10   9  110.69   14.70
   0  11   9   54.69   14.00
   2  10 -10   20.90    5.60
   2  10 -10   15.40    8.90
   2  10 -10   19.50    9.60
  -2 -10  10   21.90    5.50
   1  10 -10   25.20    9.00
   1  10 -10   21.70   11.80
   1  10 -10   -4.20   13.10
  -1 -10  10   51.89   11.20
   0  10 -10   -1.40    8.50
   0  10 -10   -6.50    8.00
   0  10 -10   -0.90    5.20
   0 -10  10    8.70    6.60
  -1  10 -10   20.20    8.00
  -1  10 -10   39.00    8.30
   1 -10  10   26.80    5.80
  -2  10 -10   19.40    6.50
   2 -10  10   20.90    5.30
   3   9 -10    8.40    5.90
   3   9 -10   21.20   10.60
   3   9 -10   18.80   11.50
   2   9 -10   23.90   17.50
   2   9 -10   47.80   10.90
   2   9 -10   41.40   13.80
  -2  -9  10   37.50    8.00
  -2  -9  10   37.80    8.40
   1   9 -10    7.90   10.70
   1   9 -10   18.40    7.20
   1   9 -10   29.60   10.60
   1   9 -10   11.90   12.40
  -1  -9  10   17.30    8.50
  -1  -9  10   37.00   10.40
   0   9 -10  193.18   32.70
   0   9 -10  164.18   20.50
   0   9 -10  198.38   18.40
   0   9 -10  129.19   21.60
   0  -9  10  184.18   21.70
   0  -9  10  174.08   19.20
  -1   9 -10   58.79   16.70
  -1   9 -10    8.40    9.30
  -1   9 -10   21.40    7.40
  -1   9 -10   19.00    9.80
[truncated: 254,460 more chars]
