# Supplementary material for: Catalytic enantioselective addition of organoboron reagents to fluoroketones controlled by electrostatic interactions
Source: Springer Nature journal article supplement (doi:10.1038/nchem.2523), 2016-05-23
Supplement: 41557_2016_BFnchem2523_MOESM269_ESM.mol [file 41557_2016_BFnchem2523_MOESM269_ESM.mol]

nchem.2523-comp17.mol
  ChemDraw05041616082D

 18 18  0  0  0  0  0  0  0  0999 V2000
   -1.7862    0.1761    0.0000 C   0  0  0  0  0  0  0  0  0  0  0  0
   -1.7862   -0.6489    0.0000 C   0  0  0  0  0  0  0  0  0  0  0  0
   -1.0717   -1.0615    0.0000 C   0  0  0  0  0  0  0  0  0  0  0  0
   -0.3572   -0.6489    0.0000 C   0  0  0  0  0  0  0  0  0  0  0  0
   -0.3572    0.1761    0.0000 C   0  0  0  0  0  0  0  0  0  0  0  0
   -1.0717    0.5886    0.0000 C   0  0  0  0  0  0  0  0  0  0  0  0
    0.3572    0.5886    0.0000 C   0  0  0  0  0  0  0  0  0  0  0  0
    1.0717    0.1761    0.0000 C   0  0  0  0  0  0  0  0  0  0  0  0
    0.7697    1.3031    0.0000 O   0  0  0  0  0  0  0  0  0  0  0  0
   -2.5006    0.5886    0.0000 Cl  0  0  0  0  0  0  0  0  0  0  0  0
   -1.0717   -1.8865    0.0000 Cl  0  0  0  0  0  0  0  0  0  0  0  0
    1.7862    0.5886    0.0000 C   0  0  0  0  0  0  0  0  0  0  0  0
    1.7862    1.4136    0.0000 O   0  0  0  0  0  0  0  0  0  0  0  0
    2.5006    0.1761    0.0000 H   0  0  0  0  0  0  0  0  0  0  0  0
   -0.0553    1.3031    0.0000 C   0  0  0  0  0  0  0  0  0  0  0  0
    0.5281    1.8862    0.0000 F   0  0  0  0  0  0  0  0  0  0  0  0
   -0.6384    1.8865    0.0000 F   0  0  0  0  0  0  0  0  0  0  0  0
   -0.6387    0.7200    0.0000 F   0  0  0  0  0  0  0  0  0  0  0  0
 15 16  1  0      
 15 17  1  0      
 15 18  1  0      
  7 15  1  6      
  1  2  2  0      
  2  3  1  0      
  3  4  2  0      
  4  5  1  0      
  5  6  2  0      
  6  1  1  0      
  5  7  1  0      
  7  8  1  0      
  7  9  1  1      
  1 10  1  0      
  3 11  1  0      
  8 12  1  0      
 12 13  2  0      
 12 14  1  0      
M  STY  1   1 SUP
M  SLB  1   1   1
M  SAL   1  4  15  16  17  18
M  SBL   1  1   4
M  SMT   1 ^CF3
M  SBV   1   4    0.4125   -0.7145
M  END
